# Supplementary material for: Mesocarnivore landscape use along a gradient of urban, rural, and forest cover
Source: PeerJ. 2021 Apr 6;9:e11083. doi: 10.7717/peerj.11083 (PMC8034353; doi:10.7717/peerj.11083)
Supplement: Supplemental Information 1 — Covaraite values (forest, water, urban cover, etc.) of each site along with the temperature and precipitation data during the survey period. [file peerj-09-11083-s001.xlsx]

## Sheet: cameratrap
Station	elevation	Setup_date	Setup_Week	Retrieval_date	Retrival_week	Urban	Rural	Forest	ONROAD	GIS.distance.to.road.unpaved	GIS.distance.to.road.paved	GIS.distance.to.nearest.road	paved.road.nearest	unpaved.road.nearest	USUMRD100M	USUMRD500M	USUMRD1000M	PSUMRD100M	PSUMRD500M	PSUMRD1000M	length.of.roads.100m	length.of.roads.500m	length.of.roads.1000m	GIS.distance.to.stream	Distance.to.human.dwelling	Point.forest.cover	GIS.forest.cover.buffer.100m	GIS.forest.cover.buffer.500m	GIS.forest.cover.buffer.1000m	NOURBAN	URBAN	GIS.urban.cover.buffer.100m	GIS.urban.cover.buffer.500m	GIS.urban.cover.buffer.1000m	NOGRASS	GRASS	GIS.grassland.cover.buffer.100m	GIS.grassland.cover.buffer.500m	GIS.grassland.cover.buffer.1000m	GIS.water.cover.buffer.100m	WATER	NOWATER	GIS.water.cover.buffer.500m	GIS.water.cover.buffer.1000m
Site 001	77.1904	2018-04-18	1	2018-06-21	10	1	0	0	0	4719.24	36.99	36.99	1	0	0	0	0	152.46	7516.3	25126	152.46	7516.3	25126	881	2.9	3	0	0	0	0	1	100	100	96.58	1	0	0	0	3.76	0	0	1	0	0
Site 002	115.214	2018-04-18	1	2019-02-09	43	1	0	0	0	1754.59	43.15	43.15	1	0	0	0	0	72.86	3773.44	14752.2	72.86	3773.44	14752.2	167.81	9.3	33	21.05	2.92	8.26	0	1	21.05	74.61	73.33	1	0	0	0	5.87	4.03	1	0	3.49	1.44
Site 003	130.743	2018-04-18	1	2019-02-09	43	0	1	0	0	899.9	43.78	43.78	1	0	0	0	0	110.07	1863.67	4355.85	110.07	1863.67	4355.85	15.49	20.7	45	5.26	41.57	50.71	0	1	36.84	15.06	8.83	0	1	21.05	31.91	28.32	4.03	1	0	1.12	0.96
Site 004	100.728	2018-04-18	1	2019-02-09	43	1	0	0	0	3615.13	18.84	18.84	1	0	0	0	0	262.15	5472.54	19520.2	262.15	5472.54	19520.2	535.96	18	23	31.58	14.83	13.28	0	1	63.16	84.72	87.29	1	0	0	0	0	0	0	1	0	0.41
Site 005	111.725	2018-04-18	1	2019-02-09	43	0	1	0	0	311.07	132.46	132.46	1	0	0	286.28	769.57	0	365.62	2896.49	0	651.9	3666.06	32.14	276.1	10	0	5.39	23.93	1	0	0	4.04	8.26	0	1	36.84	69.66	55.73	8.06	1	0	4.99	2.98
Site 006	150.807	2018-04-18	1	2019-02-09	43	0	1	0	0	925.18	61.38	61.38	1	0	0	0	0	72.79	2048.38	5041.73	72.79	2048.38	5041.73	273.29	26.7	20	0	7.87	20.28	1	0	0	31.01	19.26	0	1	73.68	58.2	50.03	0	1	0	0.77	0.97
Site 007	133.891	2018-04-20	1	2019-02-09	43	0	1	0	0	864.58	106.73	106.73	1	0	0	0	0	0	2346.27	7489.99	0	2346.27	7489.99	64.52	65.8	87	36.84	57.98	69	0	1	10.53	26.97	20.51	1	0	0	4.72	5.24	1.01	1	0	0.6	0.34
Site 008	93.4053	2018-04-20	1	2019-02-09	43	0	1	0	0	3319.37	59.61	59.61	1	0	0	0	0	90.19	3367.06	10418.5	90.19	3367.06	10418.5	269.95	39.3	25	0	4.27	3.08	0	1	89.47	82.25	57.72	1	0	0	11.69	35.9	0	1	0	1.25	1.17
Site 009	156.738	2018-04-20	1	2019-02-09	43	0	1	0	0	955.62	51.66	51.66	1	0	0	0	0	100.91	1231.86	3811.6	100.91	1231.86	3811.6	113.18	55.4	30	0	11.46	9.8	0	1	31.58	13.03	5.47	0	1	52.63	74.61	47.52	0	1	0	2.19	0.61
Site 010	172.537	2018-04-20	1	2019-02-09	43	0	1	0	0	755.12	84.89	84.89	1	0	0	0	0	0	1807.08	5572.17	0	1807.08	5572.17	124.4	48.9	11	0	45.17	51.51	0	1	15.79	14.16	10.71	0	1	78.95	37.75	28.83	0	1	0	1.38	1.42
Site 011	80.5484	2018-04-21	1	2019-02-09	43	1	0	0	0	2364.56	31.49	31.49	1	0	0	0	0	263.87	3987.73	15250.6	263.87	3987.73	15250.6	18.34	16	4	0	1.57	8.03	0	1	84.21	89.44	41.82	1	0	0	1.12	3.76	5.04	1	0	1.89	1.24
Site 012	85.5396	2018-04-21	1	2019-02-09	43	1	0	0	0	3122.23	38.05	38.05	1	0	0	0	0	354.19	5567.93	17099	354.19	5567.93	17099	104.55	12.1	3	0	0	0.17	0	1	100	98.2	45.24	1	0	0	0	0.06	0	1	0	1.46	0.1
Site 013	174.295	2018-04-21	1	2019-02-09	43	0	1	0	0	1684.63	64.96	64.96	1	0	0	0	0	42.64	1602.89	4058.13	42.64	1602.89	4058.13	214.67	25.5	70	94.74	80	51.23	0	1	15.79	14.61	3.42	1	0	0	2.47	8.49	0	1	0	0.95	0.5
Site 014	155.863	2018-04-21	1	2019-02-09	43	0	1	0	0	1118.07	73.07	73.07	1	0	0	0	0	0	2977.04	6193.98	0	2977.04	6193.98	253.14	39.8	88	63.16	36.85	17.32	0	1	5.26	18.65	4.62	1	0	0	23.37	20.23	0	1	0	2.28	1.08
Site 015	74.1573	2018-04-21	1	2019-02-09	43	1	0	0	0	8620.22	26.09	26.09	1	0	0	0	0	134.56	1694.13	7980.24	134.56	1694.13	7980.24	821.22	37	33	0	0	0.74	0	1	68.42	52.13	51.17	1	0	0	37.08	32.36	3.02	1	0	1.89	2.97
Site 016	129.437	2018-05-06	3	2019-02-09	43	0	1	0	0	751.76	21.27	21.27	1	0	0	0	0	187.31	2204.73	5010.82	187.31	2204.73	5010.82	148.33	20.7	77	36.84	21.35	3.13	0	1	42.11	7.42	0.28	0	1	21.05	13.48	3.93	0	1	0	0.73	0.19
Site 017	102.288	2018-05-06	3	2018-08-11	17	1	0	0	0	3316.81	28.53	28.53	1	0	0	0	0	257.56	3958.36	12999.4	257.56	3958.36	12999.4	291.82	10.8	12	0	16.63	13.5	0	1	84.21	82.7	79.72	1	0	0	0	6.5	0	1	0	0.52	0.52
Site 018	72.7884	2018-05-06	3	2019-02-09	43	1	0	0	0	8841.76	46.22	46.22	1	0	0	0	0	66.88	4518.77	16862.6	66.88	4518.77	16862.6	766.16	17.6	9	0	0	0	0	1	94.74	98.65	78.29	1	0	0	0	1.82	0	0	1	0	0
Site 019	63.9151	2018-05-06	3	2019-02-09	43	1	0	0	0	7664.03	44.05	44.05	1	0	0	0	0	110.81	4824.27	14685.2	110.81	4824.27	14685.2	136.63	19.9	15	0	0	0.85	0	1	100	97.75	66.89	1	0	0	0	1.37	0	1	0	1.2	2.74
Site 020	73.3903	2018-05-06	3	2019-02-09	43	1	0	0	0	8484.23	24.27	24.27	1	0	0	0	0	243.76	4076.29	16218.1	243.76	4076.29	16218.1	755.44	7.8	3	0	0	0	0	1	84.21	73.48	6.72	1	0	0	0	0	0	0	1	0	0
Site 021	90.7491	2018-05-06	3	2019-02-09	43	1	0	0	0	3671.19	36.05	36.05	1	0	0	0	0	178.27	5337.39	20301.8	178.27	5337.39	20301.8	512.75	8	12	0	0	0	0	1	63.16	14.83	5.64	1	0	0	0	0	0	0	1	0	0
Site 022	70.4088	2018-05-06	3	2019-02-09	43	1	0	0	0	5297.52	25.84	25.84	1	0	0	0	0	199.55	2605.29	9024.18	199.55	2605.29	9024.18	134.97	23.4	3	0	3.15	1.94	0	1	89.47	51.46	62.56	1	0	0	28.09	29.57	0	1	0	3.7	1.7
Site 023	61.506	2018-05-06	3	2019-02-09	43	1	0	0	0	5133.34	49.78	49.78	1	0	0	0	0	195.58	4239.39	18304.6	195.58	4239.39	18304.6	200.98	22.4	30	0	0	0	0	1	100	100	100	1	0	0	0	0.57	0	1	0	1.2	0.84
Site 024	154.622	2018-05-10	4	2019-02-09	43	1	0	0	0	2682.71	57.83	57.83	1	0	0	0	0	159.04	5079.19	17206.6	159.04	5079.19	17206.6	397.65	10.8	89	47.37	17.3	6.38	0	1	47.37	80.9	56.81	1	0	0	0	0.74	0	0	1	0	0.19
Site 025	73.236	2018-05-11	4	2018-08-11	17	1	0	0	0	4450.89	29.72	29.72	1	0	0	0	0	296.28	5304.24	23043.3	296.28	5304.24	23043.3	343.88	1	11	0	0	0	0	1	94.74	99.78	62.17	1	0	0	0	0	0	1	0	0.22	0.36
Site 026	260.689	2018-05-16	5	2019-02-09	43	0	1	0	0	1700.68	79.51	79.51	1	0	0	0	0	0	951.61	5442.28	0	951.61	5442.28	488.25	34	68	57.89	57.08	51	1	0	0	9.44	5.75	0	1	21.05	14.38	3.7	0	0	1	0	0.55
Site 027	73.4325	2018-05-16	5	2019-02-09	43	1	0	0	0	3883.19	24.22	24.22	1	0	0	0	0	117.14	4441.95	20260.5	117.14	4441.95	20260.5	56.45	3	18	0	0	0	0	1	94.74	90.56	17.55	1	0	0	0	0	3.02	1	0	1.42	0.97
Site 028	150.575	2018-05-16	5	2019-02-09	43	0	1	0	0	736.15	121.76	121.76	1	0	0	0	0	0	1110.04	2860.92	0	1110.04	2860.92	146.53	14	56	57.89	33.93	35.9	1	0	0	2.02	1.77	0	1	15.79	55.06	53.28	0	1	0	0.43	1.31
Site 029	69.7389	2018-05-22	5	2019-02-09	43	1	0	0	0	6047.03	63.08	63.08	1	0	0	0	0	46.99	3048.22	12553	46.99	3048.22	12553	179.93	26.4	13	0	0	0.06	0	1	84.21	94.16	91.4	1	0	0	4.94	8.89	0	1	0	0.95	1.25
Site 030	136.758	2018-05-30	7	2019-02-09	43	0	1	0	0	1172.22	31.27	31.27	1	0	0	0	0	129.3	1123.59	2292.23	129.3	1123.59	2292.23	1084.27	25.1	78	21.05	13.71	25.36	0	1	21.05	11.69	7.58	0	1	42.11	46.74	36.58	2.02	0	1	0	0.25
Site 031	85.7872	2018-05-31	7	2019-02-09	43	0	1	0	0	4261.39	40.19	40.19	1	0	0	0	0	116.46	1798.09	5709.87	116.46	1798.09	5709.87	397.57	37.7	92	15.79	0.9	0.23	0	1	21.05	28.76	30.88	0	1	36.84	67.87	54.47	0	1	0	0.13	3.54
Site 032	70.4137	2018-05-31	7	2019-02-09	43	1	0	0	0	4638.8	42.11	42.11	1	0	0	0	0	267.38	6408.82	19552.7	267.38	6408.82	19552.7	348.16	10.72	10	0	0	0	0	1	94.74	80	16.98	1	0	0	0	0	2.02	1	0	1.2	1
Site 033	347.703	2018-06-24	10	2019-02-10	43	0	0	1	1	3.51	955.22	3.51	0	1	149.36	1282.36	3620.42	0	0	0	149.36	1282.36	3620.42	456.28	743	86	47.37	53.71	55.67	1	0	0	0	1.17	1	0	0	6.74	13.56	0	0	1	0	0.22
Site 034	284.926	2018-06-24	10	2019-02-10	43	0	0	1	0	26.53	904.84	26.53	0	1	51.75	1409.28	6664.83	0	0	0	51.75	1409.28	6664.83	87.61	750	28	5.26	64.04	68.66	1	0	0	2.02	1.37	1	0	0	0	1.03	0	1	0	1.89	0.94
Site 035	250.75	2018-06-24	10	2019-02-10	43	0	0	1	0	39.99	1337.65	39.99	0	1	31.09	798.92	6452.94	0	0	0	31.09	798.92	6452.94	622.18	1097	29	52.63	66.07	27.86	1	0	0	0	5.65	0	1	21.05	11.01	0.11	0	0	1	0	0
Site 036	382.557	2018-06-24	10	2019-02-10	43	0	0	1	1	6.55	324.31	6.55	0	1	146.28	1421.61	3611.23	0	108.09	2643.31	146.28	1529.7	6254.54	687.85	277	67	89.47	89.66	84.16	1	0	0	6.07	7.98	1	0	0	2.47	1.31	0	0	1	0	0.03
Site 037	168.871	2018-06-24	10	2019-02-10	43	0	0	1	1	3.08	176.41	3.08	0	1	142.83	1414.26	4183.05	0	622.36	1253.31	142.83	2036.62	5436.37	226.55	722	77	89.47	59.55	55.33	1	0	0	12.58	6.32	1	0	0	19.33	24.33	0	1	0	1.33	0.81
Site 038	366.443	2018-06-24	10	2019-02-10	43	0	0	1	0	10.64	1185.02	10.64	0	1	226.42	2273.79	7251.63	0	0	0	226.42	2273.79	7251.63	249.52	2173	70	68.42	77.08	73.11	0	1	21.05	10.56	8.89	1	0	0	0.67	1.25	0	1	0	0.22	0.59
Site 039	427.137	2018-06-24	10	2019-02-10	43	0	0	1	1	22.65	2221.04	22.65	0	1	229.6	1452.66	5537.2	0	0	0	229.61	1452.66	5537.2	175.67	2948	92	57.89	27.19	31.51	0	1	31.58	9.89	9.17	0	1	5.26	28.99	16.41	0	1	0	0.52	0.53
Site 040	238.333	2018-06-24	10	2019-02-10	43	0	0	1	0	178.57	2145.12	178.57	0	1	0	1402.09	5792.39	0	0	0	0	1402.09	5792.39	111.13	2402	45	78.95	47.19	38.23	1	0	0	12.13	8.03	1	0	0	7.87	6.72	0	1	0	1.29	0.89
Site 041	223.338	2018-06-24	10	2019-02-10	43	0	0	1	1	4.6	480.14	4.6	0	1	148.06	1062.43	4090.96	0	0	1136.72	148.06	1062.43	5227.68	595.74	545	78	94.74	80.22	54.59	1	0	0	0	2.62	1	0	0	0	26.61	0	0	1	0	0.6
Site 042	208.229	2018-06-24	10	2019-02-10	43	0	0	1	1	453.03	193.68	193.68	1	0	0	0	1838.05	0	382.25	2410.13	0	382.25	4248.18	704.06	151	85	84.21	93.03	43.53	1	0	0	2.47	0.34	1	0	0	0	0	0	0	1	0	0
Site 043	256.991	2018-06-24	10	2019-02-10	43	0	0	1	1	2.49	423.03	2.49	0	1	142.55	2016.73	3497.51	0	0	1660.62	142.55	2016.73	5158.13	366.81	770	62	84.21	82.02	71.57	1	0	0	6.07	6.21	1	0	0	3.37	1.2	0	0	1	0	0.71
Site 044	305.049	2018-06-24	10	2019-02-10	43	0	0	1	1	45.69	871.1	45.69	0	1	87.53	1262.83	4358.03	0	0	0	87.53	1262.83	4358.03	369.81	822	84	100	92.58	82.62	1	0	0	0	1.71	1	0	0	1.35	3.59	0	0	1	0	0.34
Site 045	421.969	2018-06-24	10	2019-02-10	43	0	0	1	1	24.55	969.34	24.55	0	1	155.68	905.03	1905.12	0	0	0	155.68	905.03	1905.12	645.14	1029	87	84.21	80.67	74.64	1	0	0	2.25	2.22	1	0	0	3.82	5.3	0	0	1	0	0.02
Site 046	252.311	2018-06-24	10	2019-02-10	43	0	0	1	0	233.02	753.87	233.02	0	1	0	545.17	2498.65	0	0	0	0	545.17	2498.65	170.2	780	56	89.47	80	75.61	1	0	0	0	0	1	0	0	0	0.57	0	1	0	0.73	0.82
Site 047	418.68	2018-06-24	10	2019-02-10	43	0	0	1	1	0.04	1841.07	0.04	0	1	197.9	1302.29	2382.98	0	0	0	197.9	1302.29	2382.98	568.31	1863	89	89.47	82.47	74.42	1	0	0	0	0	1	0	0	5.84	2.22		0	1	0	0.31

## Sheet: temp and precip daily
Date	Week	Mean Daily Temperature F	Mean Daily Temperature C	Weekly Average Temperature F	Weekly Average Temperature C	Daily Precip (in) (24hr)	Daily Precip (mm) (24hr)	Weekly ave Precip (in)	Weekly ave Precip (mm)	Weekly sum precip (in)	Weekly sum precip (mm)
2018-04-18	1	48.28	9.04444	53.9329	12.1849	0	0	0	0	0	0
2018-04-19	1	50.84	10.4667	53.9329	12.1849	0	0	0	0	0	0
2018-04-20	1	50.4	10.2222	53.9329	12.1849	0	0	0	0	0	0
2018-04-21	1	52.44	11.3556	53.9329	12.1849	0	0	0	0	0	0
2018-04-22	1	50.91	10.5056	53.9329	12.1849	0	0	0	0	0	0
2018-04-23	1	58.99	14.9944	53.9329	12.1849	0	0	0	0	0	0
2018-04-24	1	65.67	18.7056	53.9329	12.1849	0	0	0	0	0	0
2018-04-25	2	62.76	17.0889	53.4229	11.9016	0	0	0.0514286	1.30629	0.36	9.144
2018-04-26	2	57.33	14.0722	53.4229	11.9016	0	0	0.0514286	1.30629	0.36	9.144
2018-04-27	2	50.69	10.3833	53.4229	11.9016	0.28	7.112	0.0514286	1.30629	0.36	9.144
2018-04-28	2	51.66	10.9222	53.4229	11.9016	0	0	0.0514286	1.30629	0.36	9.144
2018-04-29	2	50.93	10.5167	53.4229	11.9016	0.05	1.27	0.0514286	1.30629	0.36	9.144
2018-04-30	2	49.98	9.98889	53.4229	11.9016	0.03	0.762	0.0514286	1.30629	0.36	9.144
2018-05-01	2	50.61	10.3389	53.4229	11.9016	0	0	0.0514286	1.30629	0.36	9.144
2018-05-02	3	54.19	12.3278	56.5371	13.6317	0	0	0.02	0.508	0.14	3.556
2018-05-03	3	55.4	13	56.5371	13.6317	0	0	0.02	0.508	0.14	3.556
2018-05-04	3	54.53	12.5167	56.5371	13.6317	0	0	0.02	0.508	0.14	3.556
2018-05-05	3	58.83	14.9056	56.5371	13.6317	0	0	0.02	0.508	0.14	3.556
2018-05-06	3	57.23	14.0167	56.5371	13.6317	0.06	1.524	0.02	0.508	0.14	3.556
2018-05-07	3	57.18	13.9889	56.5371	13.6317	0	0	0.02	0.508	0.14	3.556
2018-05-08	3	58.4	14.6667	56.5371	13.6317	0.08	2.032	0.02	0.508	0.14	3.556
2018-05-09	4	59.04	15.0222	58.9443	14.969	0	0	0.00571429	0.145143	0.04	1.016
2018-05-10	4	54.37	12.4278	58.9443	14.969	0.04	1.016	0.00571429	0.145143	0.04	1.016
2018-05-11	4	54.59	12.55	58.9443	14.969	0	0	0.00571429	0.145143	0.04	1.016
2018-05-12	4	60.15	15.6389	58.9443	14.969	0	0	0.00571429	0.145143	0.04	1.016
2018-05-13	4	65.91	18.8389	58.9443	14.969	0	0	0.00571429	0.145143	0.04	1.016
2018-05-14	4	61.77	16.5389	58.9443	14.969	0	0	0.00571429	0.145143	0.04	1.016
2018-05-15	4	56.78	13.7667	58.9443	14.969	0	0	0.00571429	0.145143	0.04	1.016
2018-05-16	5	57.83	14.35	58.4829	14.7127	0	0	0	0	0	0
2018-05-17	5	57.66	14.2556	58.4829	14.7127	0	0	0	0	0	0
2018-05-18	5	57.06	13.9222	58.4829	14.7127	0	0	0	0	0	0
2018-05-19	5	57.69	14.2722	58.4829	14.7127	0	0	0	0	0	0
2018-05-20	5	56.48	13.6	58.4829	14.7127	0	0	0	0	0	0
2018-05-21	5	58.1	14.5	58.4829	14.7127	0	0	0	0	0	0
2018-05-22	5	64.56	18.0889	58.4829	14.7127	0	0	0	0	0	0
2018-05-23	6	60.63	15.9056	58.8386	14.9103	0.01	0.254	0.00142857	0.0362857	0.01	0.254
2018-05-24	6	61.29	16.2722	58.8386	14.9103	0	0	0.00142857	0.0362857	0.01	0.254
2018-05-25	6	58.51	14.7278	58.8386	14.9103	0	0	0.00142857	0.0362857	0.01	0.254
2018-05-26	6	54.61	12.5611	58.8386	14.9103	0	0	0.00142857	0.0362857	0.01	0.254
2018-05-27	6	60.06	15.5889	58.8386	14.9103	0	0	0.00142857	0.0362857	0.01	0.254
2018-05-28	6	59.87	15.4833	58.8386	14.9103	0	0	0.00142857	0.0362857	0.01	0.254
2018-05-29	6	56.9	13.8333	58.8386	14.9103	0	0	0.00142857	0.0362857	0.01	0.254
2018-05-30	7	53.75	12.0833	57.1414	13.9675	0	0	0	0	0	0
2018-05-31	7	54.2	12.3333	57.1414	13.9675	0	0	0	0	0	0
2018-06-01	7	55.47	13.0389	57.1414	13.9675	0	0	0	0	0	0
2018-06-02	7	62.68	17.0444	57.1414	13.9675	0	0	0	0	0	0
2018-06-03	7	59.03	15.0167	57.1414	13.9675	0	0	0	0	0	0
2018-06-04	7	58.15	14.5278	57.1414	13.9675	0	0	0	0	0	0
2018-06-05	7	56.71	13.7278	57.1414	13.9675	0	0	0	0	0	0
2018-06-06	8	58.32	14.6222	57.5743	14.2079	0	0	0.108571	2.75771	0.76	19.304
2018-06-07	8	59.54	15.3	57.5743	14.2079	0	0	0.108571	2.75771	0.76	19.304
2018-06-08	8	57.47	14.15	57.5743	14.2079	0.4	10.16	0.108571	2.75771	0.76	19.304
2018-06-09	8	54.05	12.25	57.5743	14.2079	0.04	1.016	0.108571	2.75771	0.76	19.304
2018-06-10	8	52.11	11.1722	57.5743	14.2079	0.26	6.604	0.108571	2.75771	0.76	19.304
2018-06-11	8	58.33	14.6278	57.5743	14.2079	0.06	1.524	0.108571	2.75771	0.76	19.304
2018-06-12	8	63.2	17.3333	57.5743	14.2079	0	0	0.108571	2.75771	0.76	19.304
2018-06-13	9	58.22	14.5667	64.2186	17.8992	0	0	0.00285714	0.0725714	0.02	0.508
2018-06-14	9	58.73	14.85	64.2186	17.8992	0	0	0.00285714	0.0725714	0.02	0.508
2018-06-15	9	59.82	15.4556	64.2186	17.8992	0	0	0.00285714	0.0725714	0.02	0.508
2018-06-16	9	62.51	16.95	64.2186	17.8992	0	0	0.00285714	0.0725714	0.02	0.508
2018-06-17	9	70.7	21.5	64.2186	17.8992	0.01	0.254	0.00285714	0.0725714	0.02	0.508
2018-06-18	9	68.86	20.4778	64.2186	17.8992	0.01	0.254	0.00285714	0.0725714	0.02	0.508
2018-06-19	9	70.69	21.4944	64.2186	17.8992	0	0	0.00285714	0.0725714	0.02	0.508
2018-06-20	10	67.33	19.6278	65.1457	18.4143	0	0	0	0	0	0
2018-06-21	10	64.54	18.0778	65.1457	18.4143	0	0	0	0	0	0
2018-06-22	10	65	18.3333	65.1457	18.4143	0	0	0	0	0	0
2018-06-23	10	66.17	18.9833	65.1457	18.4143	0	0	0	0	0	0
2018-06-24	10	69.09	20.6056	65.1457	18.4143	0	0	0	0	0	0
2018-06-25	10	62.31	16.8389	65.1457	18.4143	0	0	0	0	0	0
2018-06-26	10	61.58	16.4333	65.1457	18.4143	0	0	0	0	0	0
2018-06-27	11	62.37	16.8722	63.2757	17.3754	0	0	0	0	0	0
2018-06-28	11	60.67	15.9278	63.2757	17.3754	0	0	0	0	0	0
2018-06-29	11	63.62	17.5667	63.2757	17.3754	0	0	0	0	0	0
2018-06-30	11	66.81	19.3389	63.2757	17.3754	0	0	0	0	0	0
2018-07-01	11	67.44	19.6889	63.2757	17.3754	0	0	0	0	0	0
2018-07-02	11	60.76	15.9778	63.2757	17.3754	0	0	0	0	0	0
2018-07-03	11	61.26	16.2556	63.2757	17.3754	0	0	0	0	0	0
2018-07-04	12	64.07	17.8167	64.8586	18.2548	0	0	0	0	0	0
2018-07-05	12	66.46	19.1444	64.8586	18.2548	0	0	0	0	0	0
2018-07-06	12	64.93	18.2944	64.8586	18.2548	0	0	0	0	0	0
2018-07-07	12	64.96	18.3111	64.8586	18.2548	0	0	0	0	0	0
2018-07-08	12	66.15	18.9722	64.8586	18.2548	0	0	0	0	0	0
2018-07-09	12	60.59	15.8833	64.8586	18.2548	0	0	0	0	0	0
2018-07-10	12	66.85	19.3611	64.8586	18.2548	0	0	0	0	0	0
2018-07-11	13	72.41	22.45	75.3557	24.0865	0	0	0	0	0	0
2018-07-12	13	81.12	27.2889	75.3557	24.0865	0	0	0	0	0	0
2018-07-13	13	76.9	24.9444	75.3557	24.0865	0	0	0	0	0	0
2018-07-14	13	73.45	23.0278	75.3557	24.0865	0	0	0	0	0	0
2018-07-15	13	76.81	24.8944	75.3557	24.0865	0	0	0	0	0	0
2018-07-16	13	76.55	24.75	75.3557	24.0865	0	0	0	0	0	0
2018-07-17	13	70.25	21.25	75.3557	24.0865	0	0	0	0	0	0
2018-07-18	14	69.18	20.6556	68.84	20.4667	0	0	0	0	0	0
2018-07-19	14	63.82	17.6778	68.84	20.4667	0	0	0	0	0	0
2018-07-20	14	64.2	17.8889	68.84	20.4667	0	0	0	0	0	0
2018-07-21	14	65.75	18.75	68.84	20.4667	0	0	0	0	0	0
2018-07-22	14	71.52	21.9556	68.84	20.4667	0	0	0	0	0	0
2018-07-23	14	72.53	22.5167	68.84	20.4667	0	0	0	0	0	0
2018-07-24	14	74.88	23.8222	68.84	20.4667	0	0	0	0	0	0
2018-07-25	15	75.94	24.4111	72.4971	22.4984	0	0	0	0	0	0
2018-07-26	15	76.63	24.7944	72.4971	22.4984	0	0	0	0	0	0
2018-07-27	15	69.94	21.0778	72.4971	22.4984	0	0	0	0	0	0
2018-07-28	15	69.44	20.8	72.4971	22.4984	0	0	0	0	0	0
2018-07-29	15	75.72	24.2889	72.4971	22.4984	0	0	0	0	0	0
2018-07-30	15	70.72	21.5111	72.4971	22.4984	0	0	0	0	0	0
2018-07-31	15	69.09	20.6056	72.4971	22.4984	0	0	0	0	0	0
2018-08-01	16	67.17	19.5389	67.9986	19.9992	0	0	0	0	0	0
2018-08-02	16	62.65	17.0278	67.9986	19.9992	0	0	0	0	0	0
2018-08-03	16	65.79	18.7722	67.9986	19.9992	0	0	0	0	0	0
2018-08-04	16	69.54	20.8556	67.9986	19.9992	0	0	0	0	0	0
2018-08-05	16	68.27	20.15	67.9986	19.9992	0	0	0	0	0	0
2018-08-06	16	69.42	20.7889	67.9986	19.9992	0	0	0	0	0	0
2018-08-07	16	73.15	22.8611	67.9986	19.9992	0	0	0	0	0	0
2018-08-08	17	72.71	22.6167	70.16	21.2	0	0	0	0	0	0
2018-08-09	17	73.55	23.0833	70.16	21.2	0	0	0	0	0	0
2018-08-10	17	69.85	21.0278	70.16	21.2	0	0	0	0	0	0
2018-08-11	17	66.61	19.2278	70.16	21.2	0	0	0	0	0	0
2018-08-12	17	66.17	18.9833	70.16	21.2	0	0	0	0	0	0
2018-08-13	17	70.55	21.4167	70.16	21.2	0	0	0	0	0	0
2018-08-14	17	71.68	22.0444	70.16	21.2	0	0	0	0	0	0
2018-08-15	18	67.57	19.7611	68.2629	20.146	0	0	0	0	0	0
2018-08-16	18	65.98	18.8778	68.2629	20.146	0	0	0	0	0	0
2018-08-17	18	65.07	18.3722	68.2629	20.146	0	0	0	0	0	0
2018-08-18	18	67.8	19.8889	68.2629	20.146	0	0	0	0	0	0
2018-08-19	18	67.83	19.9056	68.2629	20.146	0	0	0	0	0	0
2018-08-20	18	64.86	18.2556	68.2629	20.146	0	0	0	0	0	0
2018-08-21	18	78.73	25.9611	68.2629	20.146	0	0	0	0	0	0
2018-08-22	19	72.27	22.3722	65.3929	18.5516	0	0	0	0	0	0
2018-08-23	19	58.83	14.9056	65.3929	18.5516	0	0	0	0	0	0
2018-08-24	19	62.01	16.6722	65.3929	18.5516	0	0	0	0	0	0
2018-08-25	19	62.03	16.6833	65.3929	18.5516	0	0	0	0	0	0
2018-08-26	19	63.57	17.5389	65.3929	18.5516	0	0	0	0	0	0
2018-08-27	19	67.16	19.5333	65.3929	18.5516	0	0	0	0	0	0
2018-08-28	19	71.88	22.1556	65.3929	18.5516	0	0	0	0	0	0
2018-08-29	20	64.29	17.9389	63.8457	17.6921	0	0	0	0	0	0
2018-08-30	20	60.95	16.0833	63.8457	17.6921	0	0	0	0	0	0
2018-08-31	20	62.58	16.9889	63.8457	17.6921	0	0	0	0	0	0
2018-09-01	20	63.43	17.4611	63.8457	17.6921	0	0	0	0	0	0
2018-09-02	20	65.71	18.7278	63.8457	17.6921	0	0	0	0	0	0
2018-09-03	20	65.44	18.5778	63.8457	17.6921	0	0	0	0	0	0
2018-09-04	20	64.52	18.0667	63.8457	17.6921	0	0	0	0	0	0
2018-09-05	21	68.66	20.3667	62.9686	17.2048	0	0	0.0585714	1.48771	0.41	10.414
2018-09-06	21	64.46	18.0333	62.9686	17.2048	0	0	0.0585714	1.48771	0.41	10.414
2018-09-07	21	60.55	15.8611	62.9686	17.2048	0	0	0.0585714	1.48771	0.41	10.414
2018-09-08	21	63.46	17.4778	62.9686	17.2048	0	0	0.0585714	1.48771	0.41	10.414
2018-09-09	21	61.51	16.3944	62.9686	17.2048	0	0	0.0585714	1.48771	0.41	10.414
2018-09-10	21	63.69	17.6056	62.9686	17.2048	0.01	0.254	0.0585714	1.48771	0.41	10.414
2018-09-11	21	58.45	14.6944	62.9686	17.2048	0.4	10.16	0.0585714	1.48771	0.41	10.414
2018-09-12	22	56.89	13.8278	56.4514	13.5841	0.44	11.176	0.0842857	2.14086	0.59	14.986
2018-09-13	22	55.77	13.2056	56.4514	13.5841	0.03	0.762	0.0842857	2.14086	0.59	14.986
2018-09-14	22	55.58	13.1	56.4514	13.5841	0	0	0.0842857	2.14086	0.59	14.986
2018-09-15	22	54.79	12.6611	56.4514	13.5841	0.04	1.016	0.0842857	2.14086	0.59	14.986
2018-09-16	22	58.72	14.8444	56.4514	13.5841	0.08	2.032	0.0842857	2.14086	0.59	14.986
2018-09-17	22	56.62	13.6778	56.4514	13.5841	0	0	0.0842857	2.14086	0.59	14.986
2018-09-18	22	56.79	13.7722	56.4514	13.5841	0	0	0.0842857	2.14086	0.59	14.986
2018-09-19	23	55.89	13.2722	59.5314	15.2952	0	0	0.00285714	0.0725714	0.02	0.508
2018-09-20	23	59.31	15.1722	59.5314	15.2952	0	0	0.00285714	0.0725714	0.02	0.508
2018-09-21	23	60.72	15.9556	59.5314	15.2952	0	0	0.00285714	0.0725714	0.02	0.508
2018-09-22	23	61.81	16.5611	59.5314	15.2952	0.02	0.508	0.00285714	0.0725714	0.02	0.508
2018-09-23	23	55.1	12.8333	59.5314	15.2952	0	0	0.00285714	0.0725714	0.02	0.508
2018-09-24	23	58.26	14.5889	59.5314	15.2952	0	0	0.00285714	0.0725714	0.02	0.508
2018-09-25	23	65.63	18.6833	59.5314	15.2952	0	0	0.00285714	0.0725714	0.02	0.508
2018-09-26	24	67.19	19.55	62.8671	17.1484	0	0	0	0	0	0
2018-09-27	24	65.22	18.4556	62.8671	17.1484	0	0	0	0	0	0
2018-09-28	24	63.83	17.6833	62.8671	17.1484	0	0	0	0	0	0
2018-09-29	24	58.87	14.9278	62.8671	17.1484	0	0	0	0	0	0
2018-09-30	24	61.28	16.2667	62.8671	17.1484	0	0	0	0	0	0
2018-10-01	24	63.45	17.4722	62.8671	17.1484	0	0	0	0	0	0
2018-10-02	24	60.23	15.6833	62.8671	17.1484	0	0	0	0	0	0
2018-10-03	25	52.31	11.2833	54.1057	12.281	0	0	0.0514286	1.30629	0.36	9.144
2018-10-04	25	54.46	12.4778	54.1057	12.281	0	0	0.0514286	1.30629	0.36	9.144
2018-10-05	25	49.03	9.46111	54.1057	12.281	0.23	5.842	0.0514286	1.30629	0.36	9.144
2018-10-06	25	56.49	13.6056	54.1057	12.281	0.05	1.27	0.0514286	1.30629	0.36	9.144
2018-10-07	25	50.44	10.2444	54.1057	12.281	0.05	1.27	0.0514286	1.30629	0.36	9.144
2018-10-08	25	57.58	14.2111	54.1057	12.281	0.03	0.762	0.0514286	1.30629	0.36	9.144
2018-10-09	25	58.43	14.6833	54.1057	12.281	0	0	0.0514286	1.30629	0.36	9.144
2018-10-10	26	52.04	11.1333	56.45	13.5833	0	0	0	0	0	0
2018-10-11	26	57.22	14.0111	56.45	13.5833	0	0	0	0	0	0
2018-10-12	26	54.4	12.4444	56.45	13.5833	0	0	0	0	0	0
2018-10-13	26	56.9	13.8333	56.45	13.5833	0	0	0	0	0	0
2018-10-14	26	59.27	15.15	56.45	13.5833	0	0	0	0	0	0
2018-10-15	26	57.42	14.1222	56.45	13.5833	0	0	0	0	0	0
2018-10-16	26	57.9	14.3889	56.45	13.5833	0	0	0	0	0	0
2018-10-17	27	57.51	14.1722	51.9714	11.0952	0	0	0	0	0	0
2018-10-18	27	52.19	11.2167	51.9714	11.0952	0	0	0	0	0	0
2018-10-19	27	51.72	10.9556	51.9714	11.0952	0	0	0	0	0	0
2018-10-20	27	53.8	12.1111	51.9714	11.0952	0	0	0	0	0	0
2018-10-21	27	50.12	10.0667	51.9714	11.0952	0	0	0	0	0	0
2018-10-22	27	49.25	9.58333	51.9714	11.0952	0	0	0	0	0	0
2018-10-23	27	49.21	9.56111	51.9714	11.0952	0	0	0	0	0	0
2018-10-24	28	53.13	11.7389	53.6543	12.0302	0	0	0.188571	4.78971	1.32	33.528
2018-10-25	28	52.05	11.1389	53.6543	12.0302	0.05	1.27	0.188571	4.78971	1.32	33.528
2018-10-26	28	58.93	14.9611	53.6543	12.0302	0.12	3.048	0.188571	4.78971	1.32	33.528
2018-10-27	28	58.27	14.5944	53.6543	12.0302	0.49	12.446	0.188571	4.78971	1.32	33.528
2018-10-28	28	55.92	13.2889	53.6543	12.0302	0.31	7.874	0.188571	4.78971	1.32	33.528
2018-10-29	28	51.03	10.5722	53.6543	12.0302	0.34	8.636	0.188571	4.78971	1.32	33.528
2018-10-30	28	46.25	7.91667	53.6543	12.0302	0.01	0.254	0.188571	4.78971	1.32	33.528
2018-10-31	29	53.81	12.1167	53.6214	12.0119	0.11	2.794	0.06	1.524	0.42	10.668
2018-11-01	29	58.83	14.9056	53.6214	12.0119	0.05	1.27	0.06	1.524	0.42	10.668
2018-11-02	29	57.78	14.3222	53.6214	12.0119	0.07	1.778	0.06	1.524	0.42	10.668
2018-11-03	29	50.77	10.4278	53.6214	12.0119	0	0	0.06	1.524	0.42	10.668
2018-11-04	29	55.81	13.2278	53.6214	12.0119	0.13	3.302	0.06	1.524	0.42	10.668
2018-11-05	29	50.5	10.2778	53.6214	12.0119	0.06	1.524	0.06	1.524	0.42	10.668
2018-11-06	29	47.85	8.80556	53.6214	12.0119	0	0	0.06	1.524	0.42	10.668
2018-11-07	30	42.45	5.80556	41.8714	5.48413	0.01	0.254	0.00285714	0.0725714	0.02	0.508
2018-11-08	30	42.77	5.98333	41.8714	5.48413	0	0	0.00285714	0.0725714	0.02	0.508
2018-11-09	30	35.74	2.07778	41.8714	5.48413	0.01	0.254	0.00285714	0.0725714	0.02	0.508
2018-11-10	30	41.7	5.38889	41.8714	5.48413	0	0	0.00285714	0.0725714	0.02	0.508
2018-11-11	30	46.55	8.08333	41.8714	5.48413	0	0	0.00285714	0.0725714	0.02	0.508
2018-11-12	30	46.4	8	41.8714	5.48413	0	0	0.00285714	0.0725714	0.02	0.508
2018-11-13	30	37.49	3.05	41.8714	5.48413	0	0	0.00285714	0.0725714	0.02	0.508
2018-11-14	31	44.02	6.67778	43.55	6.41667	0	0	0	0	0	0
2018-11-15	31	47.83	8.79444	43.55	6.41667	0	0	0	0	0	0
2018-11-16	31	46.49	8.05	43.55	6.41667	0	0	0	0	0	0
2018-11-17	31	51.04	10.5778	43.55	6.41667	0	0	0	0	0	0
2018-11-18	31	43.22	6.23333	43.55	6.41667	0	0	0	0	0	0
2018-11-19	31	36.87	2.70556	43.55	6.41667	0	0	0	0	0	0
2018-11-20	31	35.38	1.87778	43.55	6.41667	0	0	0	0	0	0
2018-11-21	32	43.3	6.27778	46.2786	7.93254	0.29	7.366	0.348571	8.85371	2.44	61.976
2018-11-22	32	47.76	8.75556	46.2786	7.93254	0.59	14.986	0.348571	8.85371	2.44	61.976
2018-11-23	32	47.29	8.49444	46.2786	7.93254	0.5	12.7	0.348571	8.85371	2.44	61.976
2018-11-24	32	40.86	4.92222	46.2786	7.93254	0.01	0.254	0.348571	8.85371	2.44	61.976
2018-11-25	32	42.03	5.57222	46.2786	7.93254	0.01	0.254	0.348571	8.85371	2.44	61.976
2018-11-26	32	48.83	9.35	46.2786	7.93254	0.01	0.254	0.348571	8.85371	2.44	61.976
2018-11-27	32	53.88	12.1556	46.2786	7.93254	1.03	26.162	0.348571	8.85371	2.44	61.976
2018-11-28	33	48.94	9.41111	42.8086	6.00476	1	25.4	0.262857	6.67657	1.84	46.736
2018-11-29	33	46.29	7.93889	42.8086	6.00476	0.01	0.254	0.262857	6.67657	1.84	46.736
2018-11-30	33	44.09	6.71667	42.8086	6.00476	0.75	19.05	0.262857	6.67657	1.84	46.736
2018-12-01	33	41.5	5.27778	42.8086	6.00476	0.06	1.524	0.262857	6.67657	1.84	46.736
2018-12-02	33	40.75	4.86111	42.8086	6.00476	0.02	0.508	0.262857	6.67657	1.84	46.736
2018-12-03	33	37.76	3.2	42.8086	6.00476	0	0	0.262857	6.67657	1.84	46.736
2018-12-04	33	40.33	4.62778	42.8086	6.00476	0	0	0.262857	6.67657	1.84	46.736
2018-12-05	34	38.21	3.45	38.6914	3.71746	0	0	0.198571	5.04371	1.39	35.306
2018-12-06	34	36.75	2.63889	38.6914	3.71746	0	0	0.198571	5.04371	1.39	35.306
2018-12-07	34	32.96	0.533333	38.6914	3.71746	0.15	3.81	0.198571	5.04371	1.39	35.306
2018-12-08	34	38.06	3.36667	38.6914	3.71746	0.08	2.032	0.198571	5.04371	1.39	35.306
2018-12-09	34	38.62	3.67778	38.6914	3.71746	0.54	13.716	0.198571	5.04371	1.39	35.306
2018-12-10	34	39.87	4.37222	38.6914	3.71746	0.01	0.254	0.198571	5.04371	1.39	35.306
2018-12-11	34	46.37	7.98333	38.6914	3.71746	0.61	15.494	0.198571	5.04371	1.39	35.306
2018-12-12	35	45.1	7.27778	44.4057	6.89206	0.03	0.762	0.307143	7.80143	2.15	54.61
2018-12-13	35	43.29	6.27222	44.4057	6.89206	0	0	0.307143	7.80143	2.15	54.61
2018-12-14	35	39.54	4.18889	44.4057	6.89206	0.17	4.318	0.307143	7.80143	2.15	54.61
2018-12-15	35	40.64	4.8	44.4057	6.89206	0.04	1.016	0.307143	7.80143	2.15	54.61
2018-12-16	35	44.79	7.10556	44.4057	6.89206	0.34	8.636	0.307143	7.80143	2.15	54.61
2018-12-17	35	45.92	7.73333	44.4057	6.89206	0.26	6.604	0.307143	7.80143	2.15	54.61
2018-12-18	35	51.56	10.8667	44.4057	6.89206	1.31	33.274	0.307143	7.80143	2.15	54.61
2018-12-19	36	47.63	8.68333	43.59	6.43889	0	0	0.164286	4.17286	1.15	29.21
2018-12-20	36	48.1	8.94444	43.59	6.43889	0.14	3.556	0.164286	4.17286	1.15	29.21
2018-12-21	36	37.1	2.83333	43.59	6.43889	0.1	2.54	0.164286	4.17286	1.15	29.21
2018-12-22	36	36.03	2.23889	43.59	6.43889	0.18	4.572	0.164286	4.17286	1.15	29.21
2018-12-23	36	47.35	8.52778	43.59	6.43889	0.63	16.002	0.164286	4.17286	1.15	29.21
2018-12-24	36	46.1	7.83333	43.59	6.43889	0.09	2.286	0.164286	4.17286	1.15	29.21
2018-12-25	36	42.82	6.01111	43.59	6.43889	0.01	0.254	0.164286	4.17286	1.15	29.21
2018-12-26	37	40.65	4.80556	40.6614	4.8119	0.23	5.842	0.114286	2.90286	0.8	20.32
2018-12-27	37	41.05	5.02778	40.6614	4.8119	0.01	0.254	0.114286	2.90286	0.8	20.32
2018-12-28	37	42.98	6.1	40.6614	4.8119	0.03	0.762	0.114286	2.90286	0.8	20.32
2018-12-29	37	47.99	8.88333	40.6614	4.8119	0.51	12.954	0.114286	2.90286	0.8	20.32
2018-12-30	37	44.31	6.83889	40.6614	4.8119	0	0	0.114286	2.90286	0.8	20.32
2018-12-31	37	37.02	2.78889	40.6614	4.8119	0.01	0.254	0.114286	2.90286	0.8	20.32
2019-01-01	37	30.63	-0.761111	40.6614	4.8119	0.01	0.254	0.114286	2.90286	0.8	20.32
2019-01-02	38	33.89	1.05	41.6271	5.34841	0	0	0.0928571	2.35857	0.65	16.51
2019-01-03	38	47.67	8.70556	41.6271	5.34841	0.02	0.508	0.0928571	2.35857	0.65	16.51
2019-01-04	38	46.19	7.88333	41.6271	5.34841	0.12	3.048	0.0928571	2.35857	0.65	16.51
2019-01-05	38	41.81	5.45	41.6271	5.34841	0.06	1.524	0.0928571	2.35857	0.65	16.51
2019-01-06	38	40.89	4.93889	41.6271	5.34841	0.19	4.826	0.0928571	2.35857	0.65	16.51
2019-01-07	38	38.44	3.57778	41.6271	5.34841	0.01	0.254	0.0928571	2.35857	0.65	16.51
2019-01-08	38	42.5	5.83333	41.6271	5.34841	0.25	6.35	0.0928571	2.35857	0.65	16.51
2019-01-09	39	45.82	7.67778	42.3614	5.75635	0.38	9.652	0.0571429	1.45143	0.4	10.16
2019-01-10	39	49.22	9.56667	42.3614	5.75635	0.02	0.508	0.0571429	1.45143	0.4	10.16
2019-01-11	39	44.66	7.03333	42.3614	5.75635	0	0	0.0571429	1.45143	0.4	10.16
2019-01-12	39	40.94	4.96667	42.3614	5.75635	0	0	0.0571429	1.45143	0.4	10.16
2019-01-13	39	39.88	4.37778	42.3614	5.75635	0	0	0.0571429	1.45143	0.4	10.16
2019-01-14	39	37.38	2.98889	42.3614	5.75635	0	0	0.0571429	1.45143	0.4	10.16
2019-01-15	39	38.63	3.68333	42.3614	5.75635	0	0	0.0571429	1.45143	0.4	10.16
2019-01-16	40	38.37	3.53889	43.3657	6.31429	0.1	2.54	0.272857	6.93057	1.91	48.514
2019-01-17	40	43.62	6.45556	43.3657	6.31429	0.37	9.398	0.272857	6.93057	1.91	48.514
2019-01-18	40	45.04	7.24444	43.3657	6.31429	0.68	17.272	0.272857	6.93057	1.91	48.514
2019-01-19	40	50.35	10.1944	43.3657	6.31429	0.07	1.778	0.272857	6.93057	1.91	48.514
2019-01-20	40	43.38	6.32222	43.3657	6.31429	0.57	14.478	0.272857	6.93057	1.91	48.514
2019-01-21	40	40	4.44444	43.3657	6.31429	0.01	0.254	0.272857	6.93057	1.91	48.514
2019-01-22	40	42.8	6	43.3657	6.31429	0.11	2.794	0.272857	6.93057	1.91	48.514
2019-01-23	41	48.29	9.05	41.9843	5.54683	0.22	5.588	0.0328571	0.834571	0.23	5.842
2019-01-24	41	42.04	5.57778	41.9843	5.54683	0	0	0.0328571	0.834571	0.23	5.842
2019-01-25	41	42.69	5.93889	41.9843	5.54683	0	0	0.0328571	0.834571	0.23	5.842
2019-01-26	41	37.21	2.89444	41.9843	5.54683	0.01	0.254	0.0328571	0.834571	0.23	5.842
2019-01-27	41	38.29	3.49444	41.9843	5.54683	0	0	0.0328571	0.834571	0.23	5.842
2019-01-28	41	44.31	6.83889	41.9843	5.54683	0	0	0.0328571	0.834571	0.23	5.842
2019-01-29	41	41.06	5.03333	41.9843	5.54683	0	0	0.0328571	0.834571	0.23	5.842
2019-01-30	42	37.01	2.78333	39.1843	3.99127	0.01	0.254	0.105714	2.68514	0.74	18.796
2019-01-31	42	35.36	1.86667	39.1843	3.99127	0	0	0.105714	2.68514	0.74	18.796
2019-02-01	42	45.48	7.48889	39.1843	3.99127	0.17	4.318	0.105714	2.68514	0.74	18.796
2019-02-02	42	46.14	7.85556	39.1843	3.99127	0.04	1.016	0.105714	2.68514	0.74	18.796
2019-02-03	42	41.71	5.39444	39.1843	3.99127	0.3	7.62	0.105714	2.68514	0.74	18.796
2019-02-04	42	35.75	2.08333	39.1843	3.99127	0.05	1.27	0.105714	2.68514	0.74	18.796
2019-02-05	42	32.84	0.466667	39.1843	3.99127	0.17	4.318	0.105714	2.68514	0.74	18.796
2019-02-06	43	32.07	0.0388889	33.138	0.632222	0	0	0.126	3.2004	0.63	16.002
2019-02-07	43	30.75	-0.694444	33.138	0.632222	0.01	0.254	0.126	3.2004	0.63	16.002
2019-02-08	43	34.79	1.55	33.138	0.632222	0.18	4.572	0.126	3.2004	0.63	16.002
2019-02-09	43	34.94	1.63333	33.138	0.632222	0.34	8.636	0.126	3.2004	0.63	16.002
2019-02-10	43	33.14	0.633333	33.138	0.632222	0.1	2.54	0.126	3.2004	0.63	16.002
