# Supplementary material for: Mesocarnivore landscape use along a gradient of urban, rural, and forest cover
Source: PeerJ. 2021 Apr 6;9:e11083. doi: 10.7717/peerj.11083 (PMC8034353; doi:10.7717/peerj.11083)
Supplement: Supplemental Information 3 — Date and time data for deer, coyote, cougar, domestic cat, domestic dog, gray fox, human, opossum, raccoon, and striped skunk. [file peerj-09-11083-s003.xlsx]

## Sheet: 30 minute buffer
Station	Species	DateTimeOriginal	Date	Time	Hour
Site 002	bobcat	2018-05-17 04:26:26	2018-05-17	04:26:26	4:26:26
Site 002	bobcat	2018-05-23 18:59:45	2018-05-23	18:59:45	18:59:45
Site 002	bobcat	2018-05-31 16:44:27	2018-05-31	16:44:27	16:44:27
Site 002	bobcat	2018-06-07 03:50:48	2018-06-07	03:50:48	3:50:48
Site 002	bobcat	2018-06-15 09:13:27	2018-06-15	09:13:27	9:13:27
Site 002	coyote	2018-05-16 00:22:37	2018-05-16	00:22:37	0:22:37
Site 002	coyote	2018-05-28 04:52:44	2018-05-28	04:52:44	4:52:44
Site 002	coyote	2018-06-02 07:30:51	2018-06-02	07:30:51	7:30:51
Site 002	coyote	2018-06-06 04:31:35	2018-06-06	04:31:35	4:31:35
Site 002	coyote	2018-06-27 04:16:07	2018-06-27	04:16:07	4:16:07
Site 002	coyote	2018-07-20 14:36:34	2018-07-20	14:36:34	14:36:34
Site 002	coyote	2018-07-25 00:45:04	2018-07-25	00:45:04	0:45:04
Site 002	coyote	2018-07-29 01:19:38	2018-07-29	01:19:38	1:19:38
Site 002	coyote	2018-07-30 00:17:21	2018-07-30	00:17:21	0:17:21
Site 002	coyote	2018-08-10 18:58:23	2018-08-10	18:58:23	18:58:23
Site 002	coyote	2018-08-11 03:51:27	2018-08-11	03:51:27	3:51:27
Site 002	coyote	2018-08-11 06:07:47	2018-08-11	06:07:47	6:07:47
Site 002	coyote	2018-08-13 07:21:39	2018-08-13	07:21:39	7:21:39
Site 002	coyote	2018-08-16 03:18:48	2018-08-16	03:18:48	3:18:48
Site 002	coyote	2018-08-16 22:17:16	2018-08-16	22:17:16	22:17:16
Site 002	coyote	2018-08-16 23:55:43	2018-08-16	23:55:43	23:55:43
Site 002	coyote	2018-08-19 05:14:32	2018-08-19	05:14:32	5:14:32
Site 002	coyote	2018-08-23 01:22:18	2018-08-23	01:22:18	1:22:18
Site 002	coyote	2018-08-23 05:43:12	2018-08-23	05:43:12	5:43:12
Site 002	coyote	2018-08-23 07:41:39	2018-08-23	07:41:39	7:41:39
Site 002	coyote	2018-08-25 04:39:19	2018-08-25	04:39:19	4:39:19
Site 002	coyote	2018-08-25 05:52:16	2018-08-25	05:52:16	5:52:16
Site 002	coyote	2018-08-26 03:06:15	2018-08-26	03:06:15	3:06:15
Site 002	grey fox	2018-06-09 22:13:17	2018-06-09	22:13:17	22:13:17
Site 002	grey fox	2018-06-14 23:17:02	2018-06-14	23:17:02	23:17:02
Site 002	grey fox	2018-06-15 01:14:40	2018-06-15	01:14:40	1:14:40
Site 002	grey fox	2018-06-16 22:11:44	2018-06-16	22:11:44	22:11:44
Site 002	grey fox	2018-06-19 23:22:08	2018-06-19	23:22:08	23:22:08
Site 002	grey fox	2018-07-08 02:14:05	2018-07-08	02:14:05	2:14:05
Site 002	grey fox	2018-07-13 20:44:01	2018-07-13	20:44:01	20:44:01
Site 002	grey fox	2018-07-26 22:51:53	2018-07-26	22:51:53	22:51:53
Site 002	grey fox	2018-08-19 01:30:18	2018-08-19	01:30:18	1:30:18
Site 002	grey fox	2018-08-23 23:07:15	2018-08-23	23:07:15	23:07:15
Site 002	grey fox	2018-08-25 22:48:42	2018-08-25	22:48:42	22:48:42
Site 002	opossum	2018-04-18 21:38:11	2018-04-18	21:38:11	21:38:11
Site 002	opossum	2018-04-19 02:20:21	2018-04-19	02:20:21	2:20:21
Site 002	opossum	2018-04-19 03:29:03	2018-04-19	03:29:03	3:29:03
Site 002	opossum	2018-04-19 20:52:22	2018-04-19	20:52:22	20:52:22
Site 002	opossum	2018-04-21 02:46:25	2018-04-21	02:46:25	2:46:25
Site 002	opossum	2018-04-22 00:10:31	2018-04-22	00:10:31	0:10:31
Site 002	opossum	2018-04-22 22:21:20	2018-04-22	22:21:20	22:21:20
Site 002	opossum	2018-04-24 00:12:02	2018-04-24	00:12:02	0:12:02
Site 002	opossum	2018-04-24 23:11:09	2018-04-24	23:11:09	23:11:09
Site 002	opossum	2018-04-24 23:46:48	2018-04-24	23:46:48	23:46:48
Site 002	opossum	2018-04-26 01:03:42	2018-04-26	01:03:42	1:03:42
Site 002	opossum	2018-04-26 19:32:37	2018-04-26	19:32:37	19:32:37
Site 002	opossum	2018-04-26 22:28:26	2018-04-26	22:28:26	22:28:26
Site 002	opossum	2018-04-27 20:38:48	2018-04-27	20:38:48	20:38:48
Site 002	opossum	2018-04-27 21:54:46	2018-04-27	21:54:46	21:54:46
Site 002	opossum	2018-04-29 22:59:59	2018-04-29	22:59:59	22:59:59
Site 002	opossum	2018-04-30 04:20:00	2018-04-30	04:20:00	4:20:00
Site 002	opossum	2018-04-30 22:24:48	2018-04-30	22:24:48	22:24:48
Site 002	opossum	2018-05-01 00:51:47	2018-05-01	00:51:47	0:51:47
Site 002	opossum	2018-05-04 21:27:33	2018-05-04	21:27:33	21:27:33
Site 002	opossum	2018-05-10 21:00:11	2018-05-10	21:00:11	21:00:11
Site 002	opossum	2018-05-14 23:35:21	2018-05-14	23:35:21	23:35:21
Site 002	opossum	2018-05-16 23:08:19	2018-05-16	23:08:19	23:08:19
Site 002	opossum	2018-05-20 02:14:32	2018-05-20	02:14:32	2:14:32
Site 002	opossum	2018-05-21 00:20:18	2018-05-21	00:20:18	0:20:18
Site 002	opossum	2018-05-22 02:02:33	2018-05-22	02:02:33	2:02:33
Site 002	opossum	2018-05-27 01:44:46	2018-05-27	01:44:46	1:44:46
Site 002	opossum	2018-05-28 21:50:22	2018-05-28	21:50:22	21:50:22
Site 002	opossum	2018-05-29 23:10:11	2018-05-29	23:10:11	23:10:11
Site 002	opossum	2018-05-31 21:26:46	2018-05-31	21:26:46	21:26:46
Site 002	opossum	2018-06-06 22:06:58	2018-06-06	22:06:58	22:06:58
Site 002	opossum	2018-06-07 21:37:45	2018-06-07	21:37:45	21:37:45
Site 002	opossum	2018-06-13 01:32:29	2018-06-13	01:32:29	1:32:29
Site 002	opossum	2018-06-15 03:52:05	2018-06-15	03:52:05	3:52:05
Site 002	opossum	2018-06-18 01:12:25	2018-06-18	01:12:25	1:12:25
Site 002	opossum	2018-06-19 22:52:04	2018-06-19	22:52:04	22:52:04
Site 002	opossum	2018-06-19 23:44:43	2018-06-19	23:44:43	23:44:43
Site 002	opossum	2018-06-22 23:20:10	2018-06-22	23:20:10	23:20:10
Site 002	opossum	2018-06-25 00:45:53	2018-06-25	00:45:53	0:45:53
Site 002	opossum	2018-06-27 21:16:27	2018-06-27	21:16:27	21:16:27
Site 002	opossum	2018-06-30 22:22:09	2018-06-30	22:22:09	22:22:09
Site 002	opossum	2018-07-01 23:24:05	2018-07-01	23:24:05	23:24:05
Site 002	opossum	2018-07-02 00:48:04	2018-07-02	00:48:04	0:48:04
Site 002	opossum	2018-07-05 02:15:30	2018-07-05	02:15:30	2:15:30
Site 002	opossum	2018-07-06 23:21:45	2018-07-06	23:21:45	23:21:45
Site 002	opossum	2018-07-08 23:55:54	2018-07-08	23:55:54	23:55:54
Site 002	opossum	2018-07-09 02:06:12	2018-07-09	02:06:12	2:06:12
Site 002	opossum	2018-07-15 23:50:25	2018-07-15	23:50:25	23:50:25
Site 002	raccoon	2018-04-19 20:26:48	2018-04-19	20:26:48	20:26:48
Site 002	raccoon	2018-04-19 21:26:46	2018-04-19	21:26:46	21:26:46
Site 002	raccoon	2018-04-21 21:23:45	2018-04-21	21:23:45	21:23:45
Site 002	raccoon	2018-04-22 00:37:37	2018-04-22	00:37:37	0:37:37
Site 002	raccoon	2018-04-22 20:14:57	2018-04-22	20:14:57	20:14:57
Site 002	raccoon	2018-04-22 21:54:09	2018-04-22	21:54:09	21:54:09
Site 002	raccoon	2018-04-23 02:14:21	2018-04-23	02:14:21	2:14:21
Site 002	raccoon	2018-04-23 22:27:16	2018-04-23	22:27:16	22:27:16
Site 002	raccoon	2018-04-24 00:19:44	2018-04-24	00:19:44	0:19:44
Site 002	raccoon	2018-04-24 22:32:30	2018-04-24	22:32:30	22:32:30
Site 002	raccoon	2018-04-24 23:31:38	2018-04-24	23:31:38	23:31:38
Site 002	raccoon	2018-04-25 00:29:46	2018-04-25	00:29:46	0:29:46
Site 002	raccoon	2018-04-25 02:01:45	2018-04-25	02:01:45	2:01:45
Site 002	raccoon	2018-04-25 22:43:19	2018-04-25	22:43:19	22:43:19
Site 002	raccoon	2018-04-26 00:38:33	2018-04-26	00:38:33	0:38:33
Site 002	raccoon	2018-04-27 00:20:10	2018-04-27	00:20:10	0:20:10
Site 002	raccoon	2018-04-28 02:56:23	2018-04-28	02:56:23	2:56:23
Site 002	raccoon	2018-04-28 19:56:25	2018-04-28	19:56:25	19:56:25
Site 002	raccoon	2018-04-28 23:53:57	2018-04-28	23:53:57	23:53:57
Site 002	raccoon	2018-04-29 22:11:19	2018-04-29	22:11:19	22:11:19
Site 002	raccoon	2018-05-02 03:26:21	2018-05-02	03:26:21	3:26:21
Site 002	raccoon	2018-05-02 20:46:29	2018-05-02	20:46:29	20:46:29
Site 002	raccoon	2018-05-03 23:01:03	2018-05-03	23:01:03	23:01:03
Site 002	raccoon	2018-05-04 20:12:03	2018-05-04	20:12:03	20:12:03
Site 002	raccoon	2018-05-05 00:13:31	2018-05-05	00:13:31	0:13:31
Site 002	raccoon	2018-05-09 05:05:01	2018-05-09	05:05:01	5:05:01
Site 002	raccoon	2018-05-09 23:10:42	2018-05-09	23:10:42	23:10:42
Site 002	raccoon	2018-05-11 01:04:10	2018-05-11	01:04:10	1:04:10
Site 002	raccoon	2018-05-12 00:45:26	2018-05-12	00:45:26	0:45:26
Site 002	raccoon	2018-05-12 02:51:01	2018-05-12	02:51:01	2:51:01
Site 002	raccoon	2018-05-16 20:44:19	2018-05-16	20:44:19	20:44:19
Site 002	raccoon	2018-05-21 20:00:23	2018-05-21	20:00:23	20:00:23
Site 002	raccoon	2018-05-22 23:02:44	2018-05-22	23:02:44	23:02:44
Site 002	raccoon	2018-06-05 20:11:10	2018-06-05	20:11:10	20:11:10
Site 002	raccoon	2018-06-10 03:18:30	2018-06-10	03:18:30	3:18:30
Site 002	raccoon	2018-06-13 22:09:03	2018-06-13	22:09:03	22:09:03
Site 002	raccoon	2018-06-14 03:06:43	2018-06-14	03:06:43	3:06:43
Site 002	raccoon	2018-06-15 02:18:46	2018-06-15	02:18:46	2:18:46
Site 002	raccoon	2018-06-29 23:38:29	2018-06-29	23:38:29	23:38:29
Site 002	raccoon	2018-08-14 23:05:00	2018-08-14	23:05:00	23:05:00
Site 003	bobcat	2018-04-30 03:40:34	2018-04-30	03:40:34	3:40:34
Site 003	bobcat	2018-07-11 09:22:30	2018-07-11	09:22:30	9:22:30
Site 003	bobcat	2018-07-11 18:39:41	2018-07-11	18:39:41	18:39:41
Site 003	bobcat	2018-07-12 09:40:06	2018-07-12	09:40:06	9:40:06
Site 003	bobcat	2018-07-12 17:10:28	2018-07-12	17:10:28	17:10:28
Site 003	bobcat	2018-09-24 21:40:45	2018-09-24	21:40:45	21:40:45
Site 003	bobcat	2018-11-04 23:58:22	2018-11-04	23:58:22	23:58:22
Site 003	bobcat	2018-11-17 06:14:53	2018-11-17	06:14:53	6:14:53
Site 003	bobcat	2018-12-10 01:00:38	2018-12-10	01:00:38	1:00:38
Site 003	bobcat	2018-12-17 01:37:15	2018-12-17	01:37:15	1:37:15
Site 003	bobcat	2018-12-17 03:47:11	2018-12-17	03:47:11	3:47:11
Site 003	bobcat	2018-12-17 04:34:13	2018-12-17	04:34:13	4:34:13
Site 003	bobcat	2018-12-18 03:59:55	2018-12-18	03:59:55	3:59:55
Site 003	bobcat	2018-12-20 01:05:54	2018-12-20	01:05:54	1:05:54
Site 003	bobcat	2018-12-29 05:26:47	2018-12-29	05:26:47	5:26:47
Site 003	bobcat	2018-12-30 07:29:34	2018-12-30	07:29:34	7:29:34
Site 003	bobcat	2019-01-11 00:27:55	2019-01-11	00:27:55	0:27:55
Site 003	bobcat	2019-01-26 04:43:47	2019-01-26	04:43:47	4:43:47
Site 003	opossum	2018-04-24 22:52:37	2018-04-24	22:52:37	22:52:37
Site 003	opossum	2018-04-27 02:29:18	2018-04-27	02:29:18	2:29:18
Site 003	opossum	2018-05-05 01:09:58	2018-05-05	01:09:58	1:09:58
Site 003	opossum	2018-05-08 04:44:53	2018-05-08	04:44:53	4:44:53
Site 003	opossum	2018-05-09 23:10:42	2018-05-09	23:10:42	23:10:42
Site 003	opossum	2018-05-27 04:03:24	2018-05-27	04:03:24	4:03:24
Site 003	opossum	2018-07-10 23:03:45	2018-07-10	23:03:45	23:03:45
Site 003	opossum	2018-07-26 04:10:36	2018-07-26	04:10:36	4:10:36
Site 003	opossum	2018-07-26 05:15:40	2018-07-26	05:15:40	5:15:40
Site 003	opossum	2018-07-26 22:17:27	2018-07-26	22:17:27	22:17:27
Site 003	opossum	2018-07-26 23:08:13	2018-07-26	23:08:13	23:08:13
Site 003	opossum	2018-07-26 23:53:15	2018-07-26	23:53:15	23:53:15
Site 003	opossum	2018-07-27 02:07:15	2018-07-27	02:07:15	2:07:15
Site 003	opossum	2018-07-29 00:56:15	2018-07-29	00:56:15	0:56:15
Site 003	opossum	2018-07-29 02:02:47	2018-07-29	02:02:47	2:02:47
Site 003	opossum	2018-07-29 03:13:06	2018-07-29	03:13:06	3:13:06
Site 003	opossum	2018-07-29 04:47:14	2018-07-29	04:47:14	4:47:14
Site 003	opossum	2018-07-31 01:55:17	2018-07-31	01:55:17	1:55:17
Site 003	opossum	2018-07-31 03:45:22	2018-07-31	03:45:22	3:45:22
Site 003	opossum	2018-07-31 05:20:19	2018-07-31	05:20:19	5:20:19
Site 003	opossum	2018-08-02 23:17:40	2018-08-02	23:17:40	23:17:40
Site 003	opossum	2018-08-03 01:03:35	2018-08-03	01:03:35	1:03:35
Site 003	opossum	2018-08-03 03:49:32	2018-08-03	03:49:32	3:49:32
Site 003	opossum	2018-08-03 05:04:09	2018-08-03	05:04:09	5:04:09
Site 003	opossum	2018-08-03 21:08:05	2018-08-03	21:08:05	21:08:05
Site 003	opossum	2018-08-04 00:01:13	2018-08-04	00:01:13	0:01:13
Site 003	opossum	2018-08-04 01:37:36	2018-08-04	01:37:36	1:37:36
Site 003	opossum	2018-08-04 04:09:51	2018-08-04	04:09:51	4:09:51
Site 003	opossum	2018-08-04 04:48:33	2018-08-04	04:48:33	4:48:33
Site 003	opossum	2018-08-04 21:13:43	2018-08-04	21:13:43	21:13:43
Site 003	opossum	2018-08-05 00:58:41	2018-08-05	00:58:41	0:58:41
Site 003	opossum	2018-08-05 02:22:41	2018-08-05	02:22:41	2:22:41
Site 003	opossum	2018-08-05 03:09:10	2018-08-05	03:09:10	3:09:10
Site 003	opossum	2018-08-05 23:43:47	2018-08-05	23:43:47	23:43:47
Site 003	opossum	2018-08-06 02:19:51	2018-08-06	02:19:51	2:19:51
Site 003	opossum	2018-08-06 21:11:55	2018-08-06	21:11:55	21:11:55
Site 003	opossum	2018-08-06 23:56:50	2018-08-06	23:56:50	23:56:50
Site 003	opossum	2018-08-07 00:11:25	2018-08-07	00:11:25	0:11:25
Site 003	opossum	2018-08-07 02:05:33	2018-08-07	02:05:33	2:05:33
Site 003	opossum	2018-08-07 23:04:11	2018-08-07	23:04:11	23:04:11
Site 003	opossum	2018-08-08 01:25:50	2018-08-08	01:25:50	1:25:50
Site 003	opossum	2018-08-08 23:32:56	2018-08-08	23:32:56	23:32:56
Site 003	opossum	2018-08-09 02:04:31	2018-08-09	02:04:31	2:04:31
Site 003	opossum	2018-08-09 04:31:33	2018-08-09	04:31:33	4:31:33
Site 003	opossum	2018-08-09 05:09:39	2018-08-09	05:09:39	5:09:39
Site 003	opossum	2018-08-09 21:16:31	2018-08-09	21:16:31	21:16:31
Site 003	opossum	2018-08-09 23:41:15	2018-08-09	23:41:15	23:41:15
Site 003	opossum	2018-08-10 04:14:55	2018-08-10	04:14:55	4:14:55
Site 003	opossum	2018-08-10 21:45:09	2018-08-10	21:45:09	21:45:09
Site 003	opossum	2018-08-11 00:41:18	2018-08-11	00:41:18	0:41:18
Site 003	opossum	2018-08-11 21:08:33	2018-08-11	21:08:33	21:08:33
Site 003	opossum	2018-08-11 22:50:08	2018-08-11	22:50:08	22:50:08
Site 003	opossum	2018-08-12 02:54:43	2018-08-12	02:54:43	2:54:43
Site 003	opossum	2018-08-12 03:50:25	2018-08-12	03:50:25	3:50:25
Site 003	opossum	2018-08-12 04:39:41	2018-08-12	04:39:41	4:39:41
Site 003	opossum	2018-08-12 22:11:55	2018-08-12	22:11:55	22:11:55
Site 003	opossum	2018-08-13 01:00:55	2018-08-13	01:00:55	1:00:55
Site 003	opossum	2018-08-13 02:31:09	2018-08-13	02:31:09	2:31:09
Site 003	opossum	2018-08-13 22:28:19	2018-08-13	22:28:19	22:28:19
Site 003	opossum	2018-08-14 05:33:31	2018-08-14	05:33:31	5:33:31
Site 003	opossum	2018-08-14 22:48:42	2018-08-14	22:48:42	22:48:42
Site 003	opossum	2018-08-14 23:38:52	2018-08-14	23:38:52	23:38:52
Site 003	opossum	2018-08-15 02:12:12	2018-08-15	02:12:12	2:12:12
Site 003	opossum	2018-08-15 20:56:33	2018-08-15	20:56:33	20:56:33
Site 003	opossum	2018-08-15 21:35:01	2018-08-15	21:35:01	21:35:01
Site 003	opossum	2018-08-15 23:21:59	2018-08-15	23:21:59	23:21:59
Site 003	opossum	2018-08-16 02:18:27	2018-08-16	02:18:27	2:18:27
Site 003	opossum	2018-08-16 23:40:17	2018-08-16	23:40:17	23:40:17
Site 003	opossum	2018-08-17 01:03:52	2018-08-17	01:03:52	1:03:52
Site 003	opossum	2018-08-17 01:37:39	2018-08-17	01:37:39	1:37:39
Site 003	opossum	2018-08-17 03:27:48	2018-08-17	03:27:48	3:27:48
Site 003	opossum	2018-08-18 02:09:11	2018-08-18	02:09:11	2:09:11
Site 003	opossum	2018-08-18 03:41:19	2018-08-18	03:41:19	3:41:19
Site 003	opossum	2018-08-19 01:27:04	2018-08-19	01:27:04	1:27:04
Site 003	opossum	2018-08-19 02:12:36	2018-08-19	02:12:36	2:12:36
Site 003	opossum	2018-08-19 03:46:52	2018-08-19	03:46:52	3:46:52
Site 003	opossum	2018-08-20 01:20:25	2018-08-20	01:20:25	1:20:25
Site 003	opossum	2018-08-20 03:05:29	2018-08-20	03:05:29	3:05:29
Site 003	opossum	2018-08-21 00:29:29	2018-08-21	00:29:29	0:29:29
Site 003	opossum	2018-08-21 02:17:46	2018-08-21	02:17:46	2:17:46
Site 003	opossum	2018-08-23 04:13:32	2018-08-23	04:13:32	4:13:32
Site 003	opossum	2018-08-24 04:03:27	2018-08-24	04:03:27	4:03:27
Site 003	opossum	2018-08-25 02:57:15	2018-08-25	02:57:15	2:57:15
Site 003	opossum	2018-08-26 02:17:02	2018-08-26	02:17:02	2:17:02
Site 003	opossum	2018-08-27 02:49:29	2018-08-27	02:49:29	2:49:29
Site 003	opossum	2018-08-27 20:58:04	2018-08-27	20:58:04	20:58:04
Site 003	opossum	2018-08-27 23:18:18	2018-08-27	23:18:18	23:18:18
Site 003	opossum	2018-08-28 04:43:07	2018-08-28	04:43:07	4:43:07
Site 003	opossum	2018-08-28 21:21:41	2018-08-28	21:21:41	21:21:41
Site 003	opossum	2018-08-29 20:59:10	2018-08-29	20:59:10	20:59:10
Site 003	opossum	2018-08-29 23:31:16	2018-08-29	23:31:16	23:31:16
Site 003	opossum	2018-08-30 00:28:32	2018-08-30	00:28:32	0:28:32
Site 003	opossum	2018-08-30 04:16:44	2018-08-30	04:16:44	4:16:44
Site 003	opossum	2018-08-30 20:49:33	2018-08-30	20:49:33	20:49:33
Site 003	opossum	2018-08-31 00:31:19	2018-08-31	00:31:19	0:31:19
Site 003	opossum	2018-08-31 20:52:08	2018-08-31	20:52:08	20:52:08
Site 003	opossum	2018-09-01 01:19:39	2018-09-01	01:19:39	1:19:39
Site 003	opossum	2018-09-01 04:16:46	2018-09-01	04:16:46	4:16:46
Site 003	opossum	2018-09-01 20:30:27	2018-09-01	20:30:27	20:30:27
Site 003	opossum	2018-09-02 00:41:42	2018-09-02	00:41:42	0:41:42
Site 003	opossum	2018-09-02 01:24:08	2018-09-02	01:24:08	1:24:08
Site 003	opossum	2018-09-02 03:45:02	2018-09-02	03:45:02	3:45:02
Site 003	opossum	2018-09-02 04:37:23	2018-09-02	04:37:23	4:37:23
Site 003	opossum	2018-09-02 20:26:56	2018-09-02	20:26:56	20:26:56
Site 003	opossum	2018-09-03 01:30:31	2018-09-03	01:30:31	1:30:31
Site 003	opossum	2018-09-03 02:06:20	2018-09-03	02:06:20	2:06:20
Site 003	opossum	2018-09-03 04:04:45	2018-09-03	04:04:45	4:04:45
Site 003	opossum	2018-09-05 02:08:17	2018-09-05	02:08:17	2:08:17
Site 003	opossum	2018-09-05 02:59:27	2018-09-05	02:59:27	2:59:27
Site 003	opossum	2018-09-05 20:14:13	2018-09-05	20:14:13	20:14:13
Site 003	opossum	2018-09-06 03:42:16	2018-09-06	03:42:16	3:42:16
Site 003	opossum	2018-09-07 02:06:31	2018-09-07	02:06:31	2:06:31
Site 003	opossum	2018-09-07 02:46:58	2018-09-07	02:46:58	2:46:58
Site 003	opossum	2018-09-07 03:51:29	2018-09-07	03:51:29	3:51:29
Site 003	opossum	2018-09-08 05:08:25	2018-09-08	05:08:25	5:08:25
Site 003	opossum	2018-09-09 02:38:54	2018-09-09	02:38:54	2:38:54
Site 003	opossum	2018-09-09 03:20:28	2018-09-09	03:20:28	3:20:28
Site 003	opossum	2018-09-09 23:44:06	2018-09-09	23:44:06	23:44:06
Site 003	opossum	2018-09-10 03:19:45	2018-09-10	03:19:45	3:19:45
Site 003	opossum	2018-09-10 05:14:40	2018-09-10	05:14:40	5:14:40
Site 003	opossum	2018-09-12 04:55:56	2018-09-12	04:55:56	4:55:56
Site 003	opossum	2018-09-15 22:51:21	2018-09-15	22:51:21	22:51:21
Site 003	opossum	2018-09-16 04:31:01	2018-09-16	04:31:01	4:31:01
Site 003	opossum	2018-09-25 04:02:00	2018-09-25	04:02:00	4:02:00
Site 003	opossum	2018-09-30 02:19:46	2018-09-30	02:19:46	2:19:46
Site 003	opossum	2018-09-30 04:50:51	2018-09-30	04:50:51	4:50:51
Site 003	opossum	2018-10-01 00:09:40	2018-10-01	00:09:40	0:09:40
Site 003	opossum	2018-10-01 04:42:56	2018-10-01	04:42:56	4:42:56
Site 003	opossum	2018-10-02 21:26:29	2018-10-02	21:26:29	21:26:29
Site 003	opossum	2018-10-03 01:38:38	2018-10-03	01:38:38	1:38:38
Site 003	opossum	2018-10-06 23:54:44	2018-10-06	23:54:44	23:54:44
Site 003	opossum	2018-10-07 01:05:44	2018-10-07	01:05:44	1:05:44
Site 003	opossum	2018-10-07 20:13:06	2018-10-07	20:13:06	20:13:06
Site 003	opossum	2018-10-13 22:22:46	2018-10-13	22:22:46	22:22:46
Site 003	opossum	2018-10-15 03:04:09	2018-10-15	03:04:09	3:04:09
Site 003	opossum	2018-10-15 22:56:00	2018-10-15	22:56:00	22:56:00
Site 003	opossum	2018-10-20 01:56:05	2018-10-20	01:56:05	1:56:05
Site 003	opossum	2018-10-20 02:37:31	2018-10-20	02:37:31	2:37:31
Site 003	opossum	2018-10-23 05:29:43	2018-10-23	05:29:43	5:29:43
Site 003	opossum	2018-10-23 21:41:15	2018-10-23	21:41:15	21:41:15
Site 003	opossum	2018-10-24 20:10:49	2018-10-24	20:10:49	20:10:49
Site 003	opossum	2018-10-25 19:55:35	2018-10-25	19:55:35	19:55:35
Site 003	opossum	2018-10-28 04:02:07	2018-10-28	04:02:07	4:02:07
Site 003	opossum	2018-10-28 19:01:22	2018-10-28	19:01:22	19:01:22
Site 003	opossum	2018-10-29 02:14:08	2018-10-29	02:14:08	2:14:08
Site 003	opossum	2018-10-29 19:01:51	2018-10-29	19:01:51	19:01:51
Site 003	opossum	2018-11-01 20:07:51	2018-11-01	20:07:51	20:07:51
Site 003	opossum	2018-11-03 00:56:49	2018-11-03	00:56:49	0:56:49
Site 003	opossum	2018-11-05 23:02:48	2018-11-05	23:02:48	23:02:48
Site 003	opossum	2018-11-15 00:53:09	2018-11-15	00:53:09	0:53:09
Site 003	opossum	2018-11-15 05:26:08	2018-11-15	05:26:08	5:26:08
Site 003	opossum	2018-11-26 21:59:50	2018-11-26	21:59:50	21:59:50
Site 003	opossum	2018-11-28 02:14:18	2018-11-28	02:14:18	2:14:18
Site 003	opossum	2018-12-02 00:42:33	2018-12-02	00:42:33	0:42:33
Site 003	opossum	2018-12-02 22:38:44	2018-12-02	22:38:44	22:38:44
Site 003	opossum	2018-12-09 21:32:17	2018-12-09	21:32:17	21:32:17
Site 003	opossum	2018-12-09 23:46:49	2018-12-09	23:46:49	23:46:49
Site 003	opossum	2018-12-12 01:02:38	2018-12-12	01:02:38	1:02:38
Site 003	opossum	2018-12-12 03:09:39	2018-12-12	03:09:39	3:09:39
Site 003	opossum	2018-12-15 23:23:25	2018-12-15	23:23:25	23:23:25
Site 003	raccoon	2018-08-03 01:27:28	2018-08-03	01:27:28	1:27:28
Site 004	bobcat	2018-04-30 02:51:34	2018-04-30	02:51:34	2:51:34
Site 004	opossum	2018-10-18 20:29:25	2018-10-18	20:29:25	20:29:25
Site 004	opossum	2018-12-30 05:47:41	2018-12-30	05:47:41	5:47:41
Site 004	opossum	2018-12-31 01:53:32	2018-12-31	01:53:32	1:53:32
Site 004	opossum	2018-12-31 23:23:22	2018-12-31	23:23:22	23:23:22
Site 004	opossum	2019-01-02 00:50:33	2019-01-02	00:50:33	0:50:33
Site 004	opossum	2019-01-12 23:36:16	2019-01-12	23:36:16	23:36:16
Site 004	opossum	2019-01-21 04:25:33	2019-01-21	04:25:33	4:25:33
Site 004	raccoon	2018-05-19 22:07:08	2018-05-19	22:07:08	22:07:08
Site 004	raccoon	2018-05-22 00:12:31	2018-05-22	00:12:31	0:12:31
Site 004	raccoon	2018-05-24 02:39:08	2018-05-24	02:39:08	2:39:08
Site 004	raccoon	2018-06-03 23:59:29	2018-06-03	23:59:29	23:59:29
Site 004	raccoon	2018-06-25 04:11:23	2018-06-25	04:11:23	4:11:23
Site 004	raccoon	2018-07-07 21:44:45	2018-07-07	21:44:45	21:44:45
Site 004	raccoon	2018-07-08 02:04:33	2018-07-08	02:04:33	2:04:33
Site 004	raccoon	2018-07-08 21:40:59	2018-07-08	21:40:59	21:40:59
Site 004	raccoon	2018-07-14 09:39:22	2018-07-14	09:39:22	9:39:22
Site 004	raccoon	2018-07-17 02:57:33	2018-07-17	02:57:33	2:57:33
Site 004	raccoon	2018-07-18 10:02:32	2018-07-18	10:02:32	10:02:32
Site 004	raccoon	2018-07-18 23:19:20	2018-07-18	23:19:20	23:19:20
Site 004	raccoon	2018-07-31 02:14:37	2018-07-31	02:14:37	2:14:37
Site 004	raccoon	2018-08-01 23:05:32	2018-08-01	23:05:32	23:05:32
Site 004	raccoon	2018-08-06 01:52:37	2018-08-06	01:52:37	1:52:37
Site 004	raccoon	2018-08-10 21:30:04	2018-08-10	21:30:04	21:30:04
Site 004	raccoon	2018-08-11 05:48:41	2018-08-11	05:48:41	5:48:41
Site 004	raccoon	2018-08-13 22:07:36	2018-08-13	22:07:36	22:07:36
Site 004	raccoon	2018-08-14 00:58:21	2018-08-14	00:58:21	0:58:21
Site 004	raccoon	2018-08-20 00:53:50	2018-08-20	00:53:50	0:53:50
Site 004	raccoon	2018-09-02 00:03:20	2018-09-02	00:03:20	0:03:20
Site 004	raccoon	2018-09-02 00:50:44	2018-09-02	00:50:44	0:50:44
Site 004	raccoon	2018-09-02 02:19:13	2018-09-02	02:19:13	2:19:13
Site 004	raccoon	2018-10-17 05:28:02	2018-10-17	05:28:02	5:28:02
Site 004	raccoon	2018-10-18 06:29:07	2018-10-18	06:29:07	6:29:07
Site 004	raccoon	2018-10-30 23:04:48	2018-10-30	23:04:48	23:04:48
Site 004	raccoon	2018-11-15 22:33:47	2018-11-15	22:33:47	22:33:47
Site 004	raccoon	2018-12-01 05:10:19	2018-12-01	05:10:19	5:10:19
Site 004	raccoon	2018-12-14 00:49:19	2018-12-14	00:49:19	0:49:19
Site 004	raccoon	2018-12-14 19:20:25	2018-12-14	19:20:25	19:20:25
Site 004	raccoon	2018-12-23 05:10:17	2018-12-23	05:10:17	5:10:17
Site 004	raccoon	2018-12-30 21:12:11	2018-12-30	21:12:11	21:12:11
Site 004	raccoon	2019-01-02 06:10:18	2019-01-02	06:10:18	6:10:18
Site 004	raccoon	2019-01-05 03:53:58	2019-01-05	03:53:58	3:53:58
Site 004	raccoon	2019-01-07 21:57:51	2019-01-07	21:57:51	21:57:51
Site 004	raccoon	2019-01-08 00:14:11	2019-01-08	00:14:11	0:14:11
Site 004	raccoon	2019-01-08 02:20:02	2019-01-08	02:20:02	2:20:02
Site 004	raccoon	2019-01-13 04:08:31	2019-01-13	04:08:31	4:08:31
Site 004	raccoon	2019-01-13 07:16:56	2019-01-13	07:16:56	7:16:56
Site 004	raccoon	2019-01-13 23:21:46	2019-01-13	23:21:46	23:21:46
Site 005	coyote	2018-07-10 13:48:09	2018-07-10	13:48:09	13:48:09
Site 005	coyote	2018-07-10 14:22:27	2018-07-10	14:22:27	14:22:27
Site 005	coyote	2018-07-31 21:57:12	2018-07-31	21:57:12	21:57:12
Site 005	coyote	2018-08-04 23:37:22	2018-08-04	23:37:22	23:37:22
Site 005	coyote	2018-08-05 21:17:01	2018-08-05	21:17:01	21:17:01
Site 005	coyote	2018-08-06 10:26:34	2018-08-06	10:26:34	10:26:34
Site 005	coyote	2018-08-07 13:04:12	2018-08-07	13:04:12	13:04:12
Site 005	coyote	2018-08-07 22:27:13	2018-08-07	22:27:13	22:27:13
Site 005	coyote	2018-08-08 01:11:33	2018-08-08	01:11:33	1:11:33
Site 005	coyote	2018-08-08 06:15:53	2018-08-08	06:15:53	6:15:53
Site 005	coyote	2018-08-08 18:52:25	2018-08-08	18:52:25	18:52:25
Site 005	coyote	2018-08-08 23:10:17	2018-08-08	23:10:17	23:10:17
Site 005	coyote	2018-08-10 10:26:07	2018-08-10	10:26:07	10:26:07
Site 005	coyote	2018-08-11 23:17:36	2018-08-11	23:17:36	23:17:36
Site 005	coyote	2018-08-12 03:01:37	2018-08-12	03:01:37	3:01:37
Site 005	coyote	2018-08-12 15:46:34	2018-08-12	15:46:34	15:46:34
Site 005	coyote	2018-08-13 14:55:04	2018-08-13	14:55:04	14:55:04
Site 005	coyote	2018-08-13 16:42:14	2018-08-13	16:42:14	16:42:14
Site 005	coyote	2018-08-13 23:54:36	2018-08-13	23:54:36	23:54:36
Site 005	coyote	2018-08-14 13:31:34	2018-08-14	13:31:34	13:31:34
Site 005	coyote	2018-08-15 05:03:19	2018-08-15	05:03:19	5:03:19
Site 005	coyote	2018-08-15 23:54:42	2018-08-15	23:54:42	23:54:42
Site 005	coyote	2018-08-16 20:42:45	2018-08-16	20:42:45	20:42:45
Site 005	coyote	2018-08-25 11:28:56	2018-08-25	11:28:56	11:28:56
Site 005	coyote	2018-08-27 22:20:42	2018-08-27	22:20:42	22:20:42
Site 005	coyote	2018-08-29 08:39:54	2018-08-29	08:39:54	8:39:54
Site 005	coyote	2018-08-29 20:25:48	2018-08-29	20:25:48	20:25:48
Site 005	coyote	2018-10-04 01:29:06	2018-10-04	01:29:06	1:29:06
Site 005	coyote	2018-10-14 07:20:09	2018-10-14	07:20:09	7:20:09
Site 005	coyote	2018-10-21 23:46:46	2018-10-21	23:46:46	23:46:46
Site 005	coyote	2018-10-22 08:31:34	2018-10-22	08:31:34	8:31:34
Site 005	coyote	2018-11-08 00:11:21	2018-11-08	00:11:21	0:11:21
Site 005	coyote	2018-11-10 20:07:14	2018-11-10	20:07:14	20:07:14
Site 005	coyote	2019-01-03 00:13:15	2019-01-03	00:13:15	0:13:15
Site 005	coyote	2019-01-07 22:47:26	2019-01-07	22:47:26	22:47:26
Site 005	coyote	2019-01-13 21:06:27	2019-01-13	21:06:27	21:06:27
Site 005	coyote	2019-01-16 10:37:52	2019-01-16	10:37:52	10:37:52
Site 005	coyote	2019-01-22 01:18:53	2019-01-22	01:18:53	1:18:53
Site 005	coyote	2019-01-25 00:02:22	2019-01-25	00:02:22	0:02:22
Site 005	grey fox	2018-08-23 14:39:02	2018-08-23	14:39:02	14:39:02
Site 005	grey fox	2018-08-24 01:12:28	2018-08-24	01:12:28	1:12:28
Site 005	grey fox	2018-09-15 19:25:14	2018-09-15	19:25:14	19:25:14
Site 006	bobcat	2019-01-12 18:18:26	2019-01-12	18:18:26	18:18:26
Site 006	bobcat	2019-01-16 21:11:10	2019-01-16	21:11:10	21:11:10
Site 006	bobcat	2019-01-21 06:26:50	2019-01-21	06:26:50	6:26:50
Site 006	coyote	2018-07-04 07:21:52	2018-07-04	07:21:52	7:21:52
Site 006	opossum	2018-07-02 01:39:04	2018-07-02	01:39:04	1:39:04
Site 006	opossum	2018-07-04 23:45:43	2018-07-04	23:45:43	23:45:43
Site 006	opossum	2018-07-05 04:10:13	2018-07-05	04:10:13	4:10:13
Site 006	opossum	2018-07-07 23:59:57	2018-07-07	23:59:57	23:59:57
Site 006	opossum	2018-07-08 01:41:23	2018-07-08	01:41:23	1:41:23
Site 006	opossum	2018-07-14 23:45:06	2018-07-14	23:45:06	23:45:06
Site 006	opossum	2018-07-22 08:46:15	2018-07-22	08:46:15	8:46:15
Site 006	opossum	2018-07-27 07:15:59	2018-07-27	07:15:59	7:15:59
Site 006	opossum	2018-08-15 22:20:36	2018-08-15	22:20:36	22:20:36
Site 006	opossum	2018-08-23 01:30:20	2018-08-23	01:30:20	1:30:20
Site 006	opossum	2018-08-29 22:08:14	2018-08-29	22:08:14	22:08:14
Site 006	opossum	2018-09-03 00:18:11	2018-09-03	00:18:11	0:18:11
Site 006	raccoon	2018-07-05 00:56:11	2018-07-05	00:56:11	0:56:11
Site 006	raccoon	2018-07-11 21:28:23	2018-07-11	21:28:23	21:28:23
Site 006	raccoon	2018-07-12 04:00:22	2018-07-12	04:00:22	4:00:22
Site 006	raccoon	2018-08-04 00:43:58	2018-08-04	00:43:58	0:43:58
Site 006	raccoon	2018-08-17 02:05:09	2018-08-17	02:05:09	2:05:09
Site 006	raccoon	2018-08-22 01:53:01	2018-08-22	01:53:01	1:53:01
Site 006	raccoon	2018-08-23 22:12:43	2018-08-23	22:12:43	22:12:43
Site 006	raccoon	2018-08-30 00:33:44	2018-08-30	00:33:44	0:33:44
Site 006	raccoon	2018-08-30 02:23:15	2018-08-30	02:23:15	2:23:15
Site 006	raccoon	2018-09-02 03:40:33	2018-09-02	03:40:33	3:40:33
Site 006	striped skunk	2018-07-02 00:03:08	2018-07-02	00:03:08	0:03:08
Site 007	bobcat	2018-06-28 01:29:08	2018-06-28	01:29:08	1:29:08
Site 007	bobcat	2018-06-29 05:55:35	2018-06-29	05:55:35	5:55:35
Site 007	bobcat	2018-07-02 01:24:34	2018-07-02	01:24:34	1:24:34
Site 007	bobcat	2018-07-24 21:58:05	2018-07-24	21:58:05	21:58:05
Site 007	bobcat	2018-08-25 01:04:23	2018-08-25	01:04:23	1:04:23
Site 007	bobcat	2018-08-25 04:24:16	2018-08-25	04:24:16	4:24:16
Site 007	bobcat	2018-09-25 22:07:08	2018-09-25	22:07:08	22:07:08
Site 007	bobcat	2018-09-26 01:39:37	2018-09-26	01:39:37	1:39:37
Site 007	grey fox	2018-09-25 03:40:25	2018-09-25	03:40:25	3:40:25
Site 007	grey fox	2018-12-06 23:13:25	2018-12-06	23:13:25	23:13:25
Site 007	grey fox	2018-12-09 06:00:30	2018-12-09	06:00:30	6:00:30
Site 007	grey fox	2019-01-13 01:45:55	2019-01-13	01:45:55	1:45:55
Site 007	opossum	2018-04-29 21:31:57	2018-04-29	21:31:57	21:31:57
Site 007	opossum	2018-05-01 03:09:02	2018-05-01	03:09:02	3:09:02
Site 007	opossum	2018-05-01 22:02:17	2018-05-01	22:02:17	22:02:17
Site 007	opossum	2018-05-20 23:39:14	2018-05-20	23:39:14	23:39:14
Site 007	opossum	2018-05-22 22:13:40	2018-05-22	22:13:40	22:13:40
Site 007	opossum	2018-05-28 05:19:49	2018-05-28	05:19:49	5:19:49
Site 007	opossum	2018-06-02 23:35:10	2018-06-02	23:35:10	23:35:10
Site 007	opossum	2018-06-14 01:58:59	2018-06-14	01:58:59	1:58:59
Site 007	opossum	2018-06-16 23:28:30	2018-06-16	23:28:30	23:28:30
Site 007	opossum	2018-06-17 23:15:48	2018-06-17	23:15:48	23:15:48
Site 007	opossum	2018-06-26 00:52:50	2018-06-26	00:52:50	0:52:50
Site 007	opossum	2018-06-26 23:12:04	2018-06-26	23:12:04	23:12:04
Site 007	opossum	2018-06-28 02:18:32	2018-06-28	02:18:32	2:18:32
Site 007	opossum	2018-06-30 00:16:51	2018-06-30	00:16:51	0:16:51
Site 007	opossum	2018-06-30 02:11:44	2018-06-30	02:11:44	2:11:44
Site 007	opossum	2018-07-02 22:35:47	2018-07-02	22:35:47	22:35:47
Site 007	opossum	2018-07-03 22:15:11	2018-07-03	22:15:11	22:15:11
Site 007	opossum	2018-07-04 00:45:30	2018-07-04	00:45:30	0:45:30
Site 007	opossum	2018-07-04 05:12:49	2018-07-04	05:12:49	5:12:49
Site 007	opossum	2018-07-05 22:19:14	2018-07-05	22:19:14	22:19:14
Site 007	opossum	2018-07-06 21:59:15	2018-07-06	21:59:15	21:59:15
Site 007	opossum	2018-07-07 03:49:36	2018-07-07	03:49:36	3:49:36
Site 007	opossum	2018-07-09 03:17:34	2018-07-09	03:17:34	3:17:34
Site 007	opossum	2018-07-10 04:10:29	2018-07-10	04:10:29	4:10:29
Site 007	opossum	2018-07-10 21:50:57	2018-07-10	21:50:57	21:50:57
Site 007	opossum	2018-07-11 02:56:13	2018-07-11	02:56:13	2:56:13
Site 007	opossum	2018-07-12 01:39:45	2018-07-12	01:39:45	1:39:45
Site 007	opossum	2018-07-13 04:21:05	2018-07-13	04:21:05	4:21:05
Site 007	opossum	2018-07-13 22:21:09	2018-07-13	22:21:09	22:21:09
Site 007	opossum	2018-07-15 22:13:49	2018-07-15	22:13:49	22:13:49
Site 007	opossum	2018-07-16 00:21:36	2018-07-16	00:21:36	0:21:36
Site 007	opossum	2018-07-16 04:41:15	2018-07-16	04:41:15	4:41:15
Site 007	opossum	2018-07-17 00:04:37	2018-07-17	00:04:37	0:04:37
Site 007	opossum	2018-07-18 01:02:50	2018-07-18	01:02:50	1:02:50
Site 007	opossum	2018-07-19 22:56:24	2018-07-19	22:56:24	22:56:24
Site 007	opossum	2018-07-20 23:40:08	2018-07-20	23:40:08	23:40:08
Site 007	opossum	2018-07-21 00:15:00	2018-07-21	00:15:00	0:15:00
Site 007	opossum	2018-07-21 21:08:11	2018-07-21	21:08:11	21:08:11
Site 007	opossum	2018-07-22 00:49:10	2018-07-22	00:49:10	0:49:10
Site 007	opossum	2018-07-22 04:13:02	2018-07-22	04:13:02	4:13:02
Site 007	opossum	2018-07-23 02:53:02	2018-07-23	02:53:02	2:53:02
Site 007	opossum	2018-07-23 03:49:25	2018-07-23	03:49:25	3:49:25
Site 007	opossum	2018-07-23 21:30:29	2018-07-23	21:30:29	21:30:29
Site 007	opossum	2018-07-24 02:17:40	2018-07-24	02:17:40	2:17:40
Site 007	opossum	2018-07-24 04:51:45	2018-07-24	04:51:45	4:51:45
Site 007	opossum	2018-07-24 21:45:18	2018-07-24	21:45:18	21:45:18
Site 007	opossum	2018-07-24 23:28:27	2018-07-24	23:28:27	23:28:27
Site 007	opossum	2018-07-25 04:53:00	2018-07-25	04:53:00	4:53:00
Site 007	opossum	2018-07-28 21:42:25	2018-07-28	21:42:25	21:42:25
Site 007	opossum	2018-07-29 02:58:18	2018-07-29	02:58:18	2:58:18
Site 007	opossum	2018-07-31 22:21:42	2018-07-31	22:21:42	22:21:42
Site 007	opossum	2018-08-02 05:42:36	2018-08-02	05:42:36	5:42:36
Site 007	opossum	2018-08-02 21:08:50	2018-08-02	21:08:50	21:08:50
Site 007	opossum	2018-08-03 23:39:39	2018-08-03	23:39:39	23:39:39
Site 007	opossum	2018-08-05 22:21:28	2018-08-05	22:21:28	22:21:28
Site 007	opossum	2018-08-07 00:28:06	2018-08-07	00:28:06	0:28:06
Site 007	opossum	2018-08-08 21:47:53	2018-08-08	21:47:53	21:47:53
Site 007	opossum	2018-08-09 04:04:41	2018-08-09	04:04:41	4:04:41
Site 007	opossum	2018-08-10 21:59:16	2018-08-10	21:59:16	21:59:16
Site 007	opossum	2018-08-10 23:47:14	2018-08-10	23:47:14	23:47:14
Site 007	opossum	2018-08-11 01:24:02	2018-08-11	01:24:02	1:24:02
Site 007	opossum	2018-08-12 03:37:40	2018-08-12	03:37:40	3:37:40
Site 007	opossum	2018-08-13 05:03:11	2018-08-13	05:03:11	5:03:11
Site 007	opossum	2018-08-15 01:22:30	2018-08-15	01:22:30	1:22:30
Site 007	opossum	2018-08-15 05:00:01	2018-08-15	05:00:01	5:00:01
Site 007	opossum	2018-08-15 20:51:24	2018-08-15	20:51:24	20:51:24
Site 007	opossum	2018-08-15 21:37:37	2018-08-15	21:37:37	21:37:37
Site 007	opossum	2018-08-16 01:38:58	2018-08-16	01:38:58	1:38:58
Site 007	opossum	2018-08-16 02:11:53	2018-08-16	02:11:53	2:11:53
Site 007	opossum	2018-08-16 03:55:29	2018-08-16	03:55:29	3:55:29
Site 007	opossum	2018-08-16 21:04:35	2018-08-16	21:04:35	21:04:35
Site 007	opossum	2018-08-16 21:48:08	2018-08-16	21:48:08	21:48:08
Site 007	opossum	2018-08-17 05:03:12	2018-08-17	05:03:12	5:03:12
Site 007	opossum	2018-08-17 21:12:42	2018-08-17	21:12:42	21:12:42
Site 007	opossum	2018-08-18 00:35:49	2018-08-18	00:35:49	0:35:49
Site 007	opossum	2018-08-18 03:29:14	2018-08-18	03:29:14	3:29:14
Site 007	opossum	2018-08-18 05:24:37	2018-08-18	05:24:37	5:24:37
Site 007	opossum	2018-08-19 00:35:49	2018-08-19	00:35:49	0:35:49
Site 007	opossum	2018-08-19 03:48:09	2018-08-19	03:48:09	3:48:09
Site 007	opossum	2018-08-20 02:34:15	2018-08-20	02:34:15	2:34:15
Site 007	opossum	2018-08-20 03:40:43	2018-08-20	03:40:43	3:40:43
Site 007	opossum	2018-08-21 01:15:54	2018-08-21	01:15:54	1:15:54
Site 007	opossum	2018-08-21 21:21:57	2018-08-21	21:21:57	21:21:57
Site 007	opossum	2018-08-22 01:45:20	2018-08-22	01:45:20	1:45:20
Site 007	opossum	2018-08-22 03:37:07	2018-08-22	03:37:07	3:37:07
Site 007	opossum	2018-08-23 04:08:58	2018-08-23	04:08:58	4:08:58
Site 007	opossum	2018-08-24 04:04:01	2018-08-24	04:04:01	4:04:01
Site 007	opossum	2018-08-24 05:12:09	2018-08-24	05:12:09	5:12:09
Site 007	opossum	2018-08-24 20:42:42	2018-08-24	20:42:42	20:42:42
Site 007	opossum	2018-08-25 01:47:21	2018-08-25	01:47:21	1:47:21
Site 007	opossum	2018-08-25 22:53:55	2018-08-25	22:53:55	22:53:55
Site 007	opossum	2018-08-26 00:43:41	2018-08-26	00:43:41	0:43:41
Site 007	opossum	2018-08-27 02:10:15	2018-08-27	02:10:15	2:10:15
Site 007	opossum	2018-08-28 02:50:52	2018-08-28	02:50:52	2:50:52
Site 007	opossum	2018-08-31 01:24:31	2018-08-31	01:24:31	1:24:31
Site 007	opossum	2018-08-31 02:08:30	2018-08-31	02:08:30	2:08:30
Site 007	opossum	2018-08-31 04:32:05	2018-08-31	04:32:05	4:32:05
Site 007	opossum	2018-08-31 20:36:38	2018-08-31	20:36:38	20:36:38
Site 007	opossum	2018-08-31 22:50:31	2018-08-31	22:50:31	22:50:31
Site 007	opossum	2018-09-01 23:30:28	2018-09-01	23:30:28	23:30:28
Site 007	opossum	2018-09-02 01:50:30	2018-09-02	01:50:30	1:50:30
Site 007	opossum	2018-09-02 22:46:03	2018-09-02	22:46:03	22:46:03
Site 007	opossum	2018-09-03 22:30:09	2018-09-03	22:30:09	22:30:09
Site 007	opossum	2018-09-03 23:06:34	2018-09-03	23:06:34	23:06:34
Site 007	opossum	2018-09-05 00:03:06	2018-09-05	00:03:06	0:03:06
Site 007	opossum	2018-09-05 03:46:17	2018-09-05	03:46:17	3:46:17
Site 007	opossum	2018-09-06 20:48:25	2018-09-06	20:48:25	20:48:25
Site 007	opossum	2018-09-06 21:46:51	2018-09-06	21:46:51	21:46:51
Site 007	opossum	2018-09-08 04:14:43	2018-09-08	04:14:43	4:14:43
Site 007	opossum	2018-09-09 00:33:07	2018-09-09	00:33:07	0:33:07
Site 007	opossum	2018-09-10 01:30:42	2018-09-10	01:30:42	1:30:42
Site 007	opossum	2018-09-11 20:45:47	2018-09-11	20:45:47	20:45:47
Site 007	opossum	2018-09-11 21:32:11	2018-09-11	21:32:11	21:32:11
Site 007	opossum	2018-09-11 22:23:51	2018-09-11	22:23:51	22:23:51
Site 007	opossum	2018-09-12 01:50:59	2018-09-12	01:50:59	1:50:59
Site 007	opossum	2018-09-12 06:14:54	2018-09-12	06:14:54	6:14:54
Site 007	opossum	2018-09-15 00:32:42	2018-09-15	00:32:42	0:32:42
Site 007	opossum	2018-09-17 23:48:03	2018-09-17	23:48:03	23:48:03
Site 007	opossum	2018-09-18 05:10:07	2018-09-18	05:10:07	5:10:07
Site 007	opossum	2018-09-20 02:10:45	2018-09-20	02:10:45	2:10:45
Site 007	opossum	2018-09-22 20:46:56	2018-09-22	20:46:56	20:46:56
Site 007	opossum	2018-09-25 01:04:36	2018-09-25	01:04:36	1:04:36
Site 007	opossum	2018-09-25 20:58:39	2018-09-25	20:58:39	20:58:39
Site 007	opossum	2018-09-25 23:13:38	2018-09-25	23:13:38	23:13:38
Site 007	opossum	2018-09-26 03:31:43	2018-09-26	03:31:43	3:31:43
Site 007	opossum	2018-09-26 21:37:27	2018-09-26	21:37:27	21:37:27
Site 007	opossum	2018-09-26 22:32:18	2018-09-26	22:32:18	22:32:18
Site 007	opossum	2018-09-27 00:21:04	2018-09-27	00:21:04	0:21:04
Site 007	opossum	2018-09-27 21:34:39	2018-09-27	21:34:39	21:34:39
Site 007	opossum	2018-09-28 03:09:11	2018-09-28	03:09:11	3:09:11
Site 007	opossum	2018-09-28 21:10:13	2018-09-28	21:10:13	21:10:13
Site 007	opossum	2018-09-29 00:35:56	2018-09-29	00:35:56	0:35:56
Site 007	opossum	2018-09-29 03:02:36	2018-09-29	03:02:36	3:02:36
Site 007	opossum	2018-09-29 04:17:51	2018-09-29	04:17:51	4:17:51
Site 007	opossum	2018-09-29 19:49:11	2018-09-29	19:49:11	19:49:11
Site 007	opossum	2018-09-29 21:16:14	2018-09-29	21:16:14	21:16:14
Site 007	opossum	2018-09-30 02:01:33	2018-09-30	02:01:33	2:01:33
Site 007	opossum	2018-09-30 19:33:43	2018-09-30	19:33:43	19:33:43
Site 007	opossum	2018-09-30 20:55:52	2018-09-30	20:55:52	20:55:52
Site 007	opossum	2018-10-01 04:24:40	2018-10-01	04:24:40	4:24:40
Site 007	opossum	2018-10-01 22:23:45	2018-10-01	22:23:45	22:23:45
Site 007	opossum	2018-10-02 00:35:33	2018-10-02	00:35:33	0:35:33
Site 007	opossum	2018-10-02 03:21:50	2018-10-02	03:21:50	3:21:50
Site 007	opossum	2018-10-03 04:31:24	2018-10-03	04:31:24	4:31:24
Site 007	opossum	2018-10-03 21:14:14	2018-10-03	21:14:14	21:14:14
Site 007	opossum	2018-10-04 05:19:40	2018-10-04	05:19:40	5:19:40
Site 007	opossum	2018-10-04 21:36:28	2018-10-04	21:36:28	21:36:28
Site 007	opossum	2018-10-05 05:23:25	2018-10-05	05:23:25	5:23:25
Site 007	opossum	2018-10-05 19:51:48	2018-10-05	19:51:48	19:51:48
Site 007	opossum	2018-10-05 23:00:57	2018-10-05	23:00:57	23:00:57
Site 007	opossum	2018-10-06 03:59:51	2018-10-06	03:59:51	3:59:51
Site 007	opossum	2018-10-06 22:16:08	2018-10-06	22:16:08	22:16:08
Site 007	opossum	2018-10-06 23:55:08	2018-10-06	23:55:08	23:55:08
Site 007	opossum	2018-10-07 00:47:36	2018-10-07	00:47:36	0:47:36
Site 007	opossum	2018-10-08 19:50:09	2018-10-08	19:50:09	19:50:09
Site 007	opossum	2018-10-08 23:55:00	2018-10-08	23:55:00	23:55:00
Site 007	opossum	2018-10-09 03:54:56	2018-10-09	03:54:56	3:54:56
Site 007	opossum	2018-10-09 22:23:56	2018-10-09	22:23:56	22:23:56
Site 007	opossum	2018-10-10 20:40:59	2018-10-10	20:40:59	20:40:59
Site 007	opossum	2018-10-10 23:43:17	2018-10-10	23:43:17	23:43:17
Site 007	opossum	2018-10-11 02:13:14	2018-10-11	02:13:14	2:13:14
Site 007	opossum	2018-10-11 22:41:26	2018-10-11	22:41:26	22:41:26
Site 007	opossum	2018-10-11 23:44:56	2018-10-11	23:44:56	23:44:56
Site 007	opossum	2018-10-13 23:22:58	2018-10-13	23:22:58	23:22:58
Site 007	opossum	2018-10-14 01:25:29	2018-10-14	01:25:29	1:25:29
Site 007	opossum	2018-10-14 23:04:46	2018-10-14	23:04:46	23:04:46
Site 007	opossum	2018-10-15 03:20:01	2018-10-15	03:20:01	3:20:01
Site 007	opossum	2018-10-16 02:36:37	2018-10-16	02:36:37	2:36:37
Site 007	opossum	2018-10-16 04:06:16	2018-10-16	04:06:16	4:06:16
Site 007	opossum	2018-10-16 19:50:42	2018-10-16	19:50:42	19:50:42
Site 007	opossum	2018-10-16 21:36:50	2018-10-16	21:36:50	21:36:50
Site 007	opossum	2018-10-16 22:19:59	2018-10-16	22:19:59	22:19:59
Site 007	opossum	2018-10-17 05:22:47	2018-10-17	05:22:47	5:22:47
Site 007	opossum	2018-10-17 20:33:49	2018-10-17	20:33:49	20:33:49
Site 007	opossum	2018-10-17 22:07:39	2018-10-17	22:07:39	22:07:39
Site 007	opossum	2018-10-18 00:03:48	2018-10-18	00:03:48	0:03:48
Site 007	opossum	2018-10-18 04:17:55	2018-10-18	04:17:55	4:17:55
Site 007	opossum	2018-10-18 05:04:00	2018-10-18	05:04:00	5:04:00
Site 007	opossum	2018-10-18 20:51:19	2018-10-18	20:51:19	20:51:19
Site 007	opossum	2018-10-18 21:47:11	2018-10-18	21:47:11	21:47:11
Site 007	opossum	2018-10-18 22:27:55	2018-10-18	22:27:55	22:27:55
Site 007	opossum	2018-10-19 01:20:39	2018-10-19	01:20:39	1:20:39
Site 007	opossum	2018-10-19 01:52:15	2018-10-19	01:52:15	1:52:15
Site 007	opossum	2018-10-19 03:33:28	2018-10-19	03:33:28	3:33:28
Site 007	opossum	2018-10-19 21:23:49	2018-10-19	21:23:49	21:23:49
Site 007	opossum	2018-10-20 02:46:58	2018-10-20	02:46:58	2:46:58
Site 007	opossum	2018-10-20 03:58:52	2018-10-20	03:58:52	3:58:52
Site 007	opossum	2018-10-20 20:25:59	2018-10-20	20:25:59	20:25:59
Site 007	opossum	2018-10-20 21:01:40	2018-10-20	21:01:40	21:01:40
Site 007	opossum	2018-10-20 23:21:31	2018-10-20	23:21:31	23:21:31
Site 007	opossum	2018-10-21 00:19:12	2018-10-21	00:19:12	0:19:12
Site 007	opossum	2018-10-21 06:40:19	2018-10-21	06:40:19	6:40:19
Site 007	opossum	2018-10-21 20:22:47	2018-10-21	20:22:47	20:22:47
Site 007	opossum	2018-10-21 22:41:55	2018-10-21	22:41:55	22:41:55
Site 007	opossum	2018-10-22 00:33:14	2018-10-22	00:33:14	0:33:14
Site 007	opossum	2018-10-22 01:57:35	2018-10-22	01:57:35	1:57:35
Site 007	opossum	2018-10-22 05:32:29	2018-10-22	05:32:29	5:32:29
Site 007	opossum	2018-10-22 22:04:38	2018-10-22	22:04:38	22:04:38
Site 007	opossum	2018-10-23 02:19:53	2018-10-23	02:19:53	2:19:53
Site 007	opossum	2018-10-23 04:10:04	2018-10-23	04:10:04	4:10:04
Site 007	opossum	2018-10-23 21:09:30	2018-10-23	21:09:30	21:09:30
Site 007	opossum	2018-10-24 00:05:52	2018-10-24	00:05:52	0:05:52
Site 007	opossum	2018-10-24 05:33:03	2018-10-24	05:33:03	5:33:03
Site 007	opossum	2018-10-24 06:17:24	2018-10-24	06:17:24	6:17:24
Site 007	opossum	2018-10-24 19:48:07	2018-10-24	19:48:07	19:48:07
Site 007	opossum	2018-10-24 20:55:47	2018-10-24	20:55:47	20:55:47
Site 007	opossum	2018-10-25 00:36:10	2018-10-25	00:36:10	0:36:10
Site 007	opossum	2018-10-25 05:23:46	2018-10-25	05:23:46	5:23:46
Site 007	opossum	2018-10-25 19:18:12	2018-10-25	19:18:12	19:18:12
Site 007	opossum	2018-10-25 22:38:58	2018-10-25	22:38:58	22:38:58
Site 007	opossum	2018-10-25 23:18:57	2018-10-25	23:18:57	23:18:57
Site 007	opossum	2018-10-26 02:34:11	2018-10-26	02:34:11	2:34:11
Site 007	opossum	2018-10-26 04:24:25	2018-10-26	04:24:25	4:24:25
Site 007	opossum	2018-10-26 05:01:05	2018-10-26	05:01:05	5:01:05
Site 007	opossum	2018-10-26 20:36:56	2018-10-26	20:36:56	20:36:56
Site 007	opossum	2018-10-26 22:15:21	2018-10-26	22:15:21	22:15:21
Site 007	opossum	2018-10-27 20:28:20	2018-10-27	20:28:20	20:28:20
Site 007	opossum	2018-10-28 02:12:32	2018-10-28	02:12:32	2:12:32
Site 007	opossum	2018-10-28 04:09:18	2018-10-28	04:09:18	4:09:18
Site 007	opossum	2018-10-28 07:04:47	2018-10-28	07:04:47	7:04:47
Site 007	opossum	2018-10-28 20:50:13	2018-10-28	20:50:13	20:50:13
Site 007	opossum	2018-10-29 05:28:09	2018-10-29	05:28:09	5:28:09
Site 007	opossum	2018-10-29 20:11:47	2018-10-29	20:11:47	20:11:47
Site 007	opossum	2018-10-29 20:41:52	2018-10-29	20:41:52	20:41:52
Site 007	opossum	2018-10-29 21:29:12	2018-10-29	21:29:12	21:29:12
Site 007	opossum	2018-10-29 23:42:02	2018-10-29	23:42:02	23:42:02
Site 007	opossum	2018-10-30 01:00:20	2018-10-30	01:00:20	1:00:20
Site 007	opossum	2018-10-30 02:58:50	2018-10-30	02:58:50	2:58:50
Site 007	opossum	2018-10-30 04:08:43	2018-10-30	04:08:43	4:08:43
Site 007	opossum	2018-10-30 06:03:08	2018-10-30	06:03:08	6:03:08
Site 007	opossum	2018-10-30 23:36:17	2018-10-30	23:36:17	23:36:17
Site 007	opossum	2018-10-31 03:05:06	2018-10-31	03:05:06	3:05:06
Site 007	opossum	2018-10-31 20:38:16	2018-10-31	20:38:16	20:38:16
Site 007	opossum	2018-10-31 22:41:02	2018-10-31	22:41:02	22:41:02
Site 007	opossum	2018-11-01 00:53:53	2018-11-01	00:53:53	0:53:53
Site 007	opossum	2018-11-01 04:32:12	2018-11-01	04:32:12	4:32:12
Site 007	opossum	2018-11-01 06:26:41	2018-11-01	06:26:41	6:26:41
Site 007	opossum	2018-11-02 00:23:56	2018-11-02	00:23:56	0:23:56
Site 007	opossum	2018-11-03 01:41:44	2018-11-03	01:41:44	1:41:44
Site 007	opossum	2018-11-03 03:09:59	2018-11-03	03:09:59	3:09:59
Site 007	opossum	2018-11-03 23:25:23	2018-11-03	23:25:23	23:25:23
Site 007	opossum	2018-11-05 00:09:41	2018-11-05	00:09:41	0:09:41
Site 007	opossum	2018-11-05 01:44:08	2018-11-05	01:44:08	1:44:08
Site 007	opossum	2018-11-06 02:25:36	2018-11-06	02:25:36	2:25:36
Site 007	opossum	2018-11-06 03:27:37	2018-11-06	03:27:37	3:27:37
Site 007	opossum	2018-11-06 23:42:20	2018-11-06	23:42:20	23:42:20
Site 007	opossum	2018-11-08 02:14:58	2018-11-08	02:14:58	2:14:58
Site 007	opossum	2018-11-09 22:56:12	2018-11-09	22:56:12	22:56:12
Site 007	opossum	2018-11-10 20:11:58	2018-11-10	20:11:58	20:11:58
Site 007	opossum	2018-11-11 00:21:58	2018-11-11	00:21:58	0:21:58
Site 007	opossum	2018-11-13 02:54:54	2018-11-13	02:54:54	2:54:54
Site 007	opossum	2018-11-14 21:51:38	2018-11-14	21:51:38	21:51:38
Site 007	opossum	2018-11-16 05:48:55	2018-11-16	05:48:55	5:48:55
Site 007	opossum	2018-11-16 22:33:59	2018-11-16	22:33:59	22:33:59
Site 007	opossum	2018-11-17 06:22:58	2018-11-17	06:22:58	6:22:58
Site 007	opossum	2018-11-18 00:07:39	2018-11-18	00:07:39	0:07:39
Site 007	opossum	2018-11-22 07:24:40	2018-11-22	07:24:40	7:24:40
Site 007	opossum	2018-11-24 04:45:40	2018-11-24	04:45:40	4:45:40
Site 007	opossum	2018-11-26 01:35:07	2018-11-26	01:35:07	1:35:07
Site 007	opossum	2018-11-27 03:58:58	2018-11-27	03:58:58	3:58:58
Site 007	opossum	2018-11-28 06:17:42	2018-11-28	06:17:42	6:17:42
Site 007	opossum	2018-11-29 05:25:26	2018-11-29	05:25:26	5:25:26
Site 007	opossum	2018-11-30 01:13:10	2018-11-30	01:13:10	1:13:10
Site 007	opossum	2018-12-01 05:40:06	2018-12-01	05:40:06	5:40:06
Site 007	opossum	2018-12-02 01:53:08	2018-12-02	01:53:08	1:53:08
Site 007	opossum	2018-12-02 04:49:57	2018-12-02	04:49:57	4:49:57
Site 007	opossum	2018-12-03 20:31:57	2018-12-03	20:31:57	20:31:57
Site 007	opossum	2018-12-05 19:30:57	2018-12-05	19:30:57	19:30:57
Site 007	opossum	2018-12-13 04:36:49	2018-12-13	04:36:49	4:36:49
Site 007	opossum	2018-12-13 22:45:58	2018-12-13	22:45:58	22:45:58
Site 007	opossum	2018-12-17 01:59:57	2018-12-17	01:59:57	1:59:57
Site 007	opossum	2018-12-18 20:58:21	2018-12-18	20:58:21	20:58:21
Site 007	opossum	2018-12-19 19:11:48	2018-12-19	19:11:48	19:11:48
Site 007	opossum	2018-12-20 00:26:43	2018-12-20	00:26:43	0:26:43
Site 007	opossum	2018-12-21 00:01:45	2018-12-21	00:01:45	0:01:45
Site 007	opossum	2018-12-21 02:23:22	2018-12-21	02:23:22	2:23:22
Site 007	opossum	2018-12-21 04:21:06	2018-12-21	04:21:06	4:21:06
Site 007	opossum	2018-12-21 19:22:19	2018-12-21	19:22:19	19:22:19
Site 007	opossum	2018-12-24 03:54:35	2018-12-24	03:54:35	3:54:35
Site 007	opossum	2018-12-25 22:43:29	2018-12-25	22:43:29	22:43:29
Site 007	opossum	2018-12-26 00:55:15	2018-12-26	00:55:15	0:55:15
Site 007	opossum	2018-12-29 00:49:50	2018-12-29	00:49:50	0:49:50
Site 007	opossum	2018-12-31 21:24:43	2018-12-31	21:24:43	21:24:43
Site 007	opossum	2019-01-03 04:21:43	2019-01-03	04:21:43	4:21:43
Site 007	opossum	2019-01-03 20:32:05	2019-01-03	20:32:05	20:32:05
Site 007	opossum	2019-01-09 04:19:20	2019-01-09	04:19:20	4:19:20
Site 007	opossum	2019-01-10 00:34:37	2019-01-10	00:34:37	0:34:37
Site 007	opossum	2019-01-10 22:56:34	2019-01-10	22:56:34	22:56:34
Site 007	opossum	2019-01-11 01:03:05	2019-01-11	01:03:05	1:03:05
Site 007	opossum	2019-01-11 03:40:47	2019-01-11	03:40:47	3:40:47
Site 007	opossum	2019-01-11 05:46:07	2019-01-11	05:46:07	5:46:07
Site 007	opossum	2019-01-11 22:52:35	2019-01-11	22:52:35	22:52:35
Site 007	opossum	2019-01-13 04:52:15	2019-01-13	04:52:15	4:52:15
Site 007	opossum	2019-01-13 05:25:31	2019-01-13	05:25:31	5:25:31
Site 007	opossum	2019-01-16 02:47:08	2019-01-16	02:47:08	2:47:08
Site 007	opossum	2019-01-16 04:28:38	2019-01-16	04:28:38	4:28:38
Site 007	opossum	2019-01-16 20:05:08	2019-01-16	20:05:08	20:05:08
Site 007	opossum	2019-01-17 01:34:49	2019-01-17	01:34:49	1:34:49
Site 007	opossum	2019-01-17 03:54:56	2019-01-17	03:54:56	3:54:56
Site 007	opossum	2019-01-17 22:48:44	2019-01-17	22:48:44	22:48:44
Site 007	opossum	2019-01-19 05:39:44	2019-01-19	05:39:44	5:39:44
Site 007	opossum	2019-01-20 03:55:36	2019-01-20	03:55:36	3:55:36
Site 007	opossum	2019-01-20 23:57:14	2019-01-20	23:57:14	23:57:14
Site 007	opossum	2019-01-21 02:04:33	2019-01-21	02:04:33	2:04:33
Site 007	opossum	2019-01-25 21:51:05	2019-01-25	21:51:05	21:51:05
Site 007	opossum	2019-01-26 00:26:42	2019-01-26	00:26:42	0:26:42
Site 007	raccoon	2018-04-20 21:26:11	2018-04-20	21:26:11	21:26:11
Site 007	raccoon	2018-04-23 21:28:15	2018-04-23	21:28:15	21:28:15
Site 007	raccoon	2018-04-25 22:03:12	2018-04-25	22:03:12	22:03:12
Site 007	raccoon	2018-04-25 23:33:23	2018-04-25	23:33:23	23:33:23
Site 007	raccoon	2018-04-29 22:52:51	2018-04-29	22:52:51	22:52:51
Site 007	raccoon	2018-05-01 05:57:05	2018-05-01	05:57:05	5:57:05
Site 007	raccoon	2018-05-01 22:09:41	2018-05-01	22:09:41	22:09:41
Site 007	raccoon	2018-05-06 21:59:57	2018-05-06	21:59:57	21:59:57
Site 007	raccoon	2018-05-07 23:09:37	2018-05-07	23:09:37	23:09:37
Site 007	raccoon	2018-05-14 05:14:54	2018-05-14	05:14:54	5:14:54
Site 007	raccoon	2018-05-17 00:31:39	2018-05-17	00:31:39	0:31:39
Site 007	raccoon	2018-05-19 22:38:47	2018-05-19	22:38:47	22:38:47
Site 007	raccoon	2018-05-25 23:42:45	2018-05-25	23:42:45	23:42:45
Site 007	raccoon	2018-06-16 02:33:07	2018-06-16	02:33:07	2:33:07
Site 007	raccoon	2018-06-17 05:08:08	2018-06-17	05:08:08	5:08:08
Site 007	raccoon	2018-06-17 07:49:27	2018-06-17	07:49:27	7:49:27
Site 007	raccoon	2018-06-17 21:31:32	2018-06-17	21:31:32	21:31:32
Site 007	raccoon	2018-06-18 03:21:25	2018-06-18	03:21:25	3:21:25
Site 007	raccoon	2018-06-19 20:02:15	2018-06-19	20:02:15	20:02:15
Site 007	raccoon	2018-06-20 17:26:51	2018-06-20	17:26:51	17:26:51
Site 007	raccoon	2018-06-21 04:56:44	2018-06-21	04:56:44	4:56:44
Site 007	raccoon	2018-06-21 19:03:56	2018-06-21	19:03:56	19:03:56
Site 007	raccoon	2018-06-21 20:32:02	2018-06-21	20:32:02	20:32:02
Site 007	raccoon	2018-06-21 21:11:37	2018-06-21	21:11:37	21:11:37
Site 007	raccoon	2018-06-24 18:58:08	2018-06-24	18:58:08	18:58:08
Site 007	raccoon	2018-06-24 19:51:25	2018-06-24	19:51:25	19:51:25
Site 007	raccoon	2018-06-24 21:20:39	2018-06-24	21:20:39	21:20:39
Site 007	raccoon	2018-06-25 02:00:21	2018-06-25	02:00:21	2:00:21
Site 007	raccoon	2018-06-25 19:03:24	2018-06-25	19:03:24	19:03:24
Site 007	raccoon	2018-06-29 20:02:52	2018-06-29	20:02:52	20:02:52
Site 007	raccoon	2018-06-30 18:37:21	2018-06-30	18:37:21	18:37:21
Site 007	raccoon	2018-06-30 21:02:16	2018-06-30	21:02:16	21:02:16
Site 007	raccoon	2018-07-03 19:33:38	2018-07-03	19:33:38	19:33:38
Site 007	raccoon	2018-07-04 05:00:34	2018-07-04	05:00:34	5:00:34
Site 007	raccoon	2018-07-05 01:28:28	2018-07-05	01:28:28	1:28:28
Site 007	raccoon	2018-07-08 19:28:17	2018-07-08	19:28:17	19:28:17
Site 007	raccoon	2018-07-09 21:29:27	2018-07-09	21:29:27	21:29:27
Site 007	raccoon	2018-07-10 23:19:20	2018-07-10	23:19:20	23:19:20
Site 007	raccoon	2018-07-12 05:07:30	2018-07-12	05:07:30	5:07:30
Site 007	raccoon	2018-07-12 23:58:52	2018-07-12	23:58:52	23:58:52
Site 007	raccoon	2018-07-15 02:43:46	2018-07-15	02:43:46	2:43:46
Site 007	raccoon	2018-07-15 03:56:08	2018-07-15	03:56:08	3:56:08
Site 007	raccoon	2018-07-16 02:57:11	2018-07-16	02:57:11	2:57:11
Site 007	raccoon	2018-07-16 23:17:30	2018-07-16	23:17:30	23:17:30
Site 007	raccoon	2018-07-17 00:10:39	2018-07-17	00:10:39	0:10:39
Site 007	raccoon	2018-07-17 00:59:37	2018-07-17	00:59:37	0:59:37
Site 007	raccoon	2018-07-17 05:38:32	2018-07-17	05:38:32	5:38:32
Site 007	raccoon	2018-07-17 22:30:58	2018-07-17	22:30:58	22:30:58
Site 007	raccoon	2018-07-18 01:39:08	2018-07-18	01:39:08	1:39:08
Site 007	raccoon	2018-07-18 02:22:07	2018-07-18	02:22:07	2:22:07
Site 007	raccoon	2018-07-18 18:31:19	2018-07-18	18:31:19	18:31:19
Site 007	raccoon	2018-07-18 23:09:02	2018-07-18	23:09:02	23:09:02
Site 007	raccoon	2018-07-19 23:07:06	2018-07-19	23:07:06	23:07:06
Site 007	raccoon	2018-07-20 01:10:08	2018-07-20	01:10:08	1:10:08
Site 007	raccoon	2018-07-20 02:09:05	2018-07-20	02:09:05	2:09:05
Site 007	raccoon	2018-07-20 02:53:03	2018-07-20	02:53:03	2:53:03
Site 007	raccoon	2018-07-20 03:46:00	2018-07-20	03:46:00	3:46:00
Site 007	raccoon	2018-07-20 14:49:22	2018-07-20	14:49:22	14:49:22
Site 007	raccoon	2018-07-21 01:29:19	2018-07-21	01:29:19	1:29:19
Site 007	raccoon	2018-07-21 02:48:07	2018-07-21	02:48:07	2:48:07
Site 007	raccoon	2018-07-21 16:51:35	2018-07-21	16:51:35	16:51:35
Site 007	raccoon	2018-07-22 21:37:47	2018-07-22	21:37:47	21:37:47
Site 007	raccoon	2018-07-23 05:18:15	2018-07-23	05:18:15	5:18:15
Site 007	raccoon	2018-07-24 03:52:21	2018-07-24	03:52:21	3:52:21
Site 007	raccoon	2018-07-24 13:33:29	2018-07-24	13:33:29	13:33:29
Site 007	raccoon	2018-07-25 04:12:27	2018-07-25	04:12:27	4:12:27
Site 007	raccoon	2018-07-26 05:21:03	2018-07-26	05:21:03	5:21:03
Site 007	raccoon	2018-07-26 06:09:50	2018-07-26	06:09:50	6:09:50
Site 007	raccoon	2018-07-26 22:09:24	2018-07-26	22:09:24	22:09:24
Site 007	raccoon	2018-07-28 02:29:25	2018-07-28	02:29:25	2:29:25
Site 007	raccoon	2018-07-28 05:07:18	2018-07-28	05:07:18	5:07:18
Site 007	raccoon	2018-07-29 08:29:19	2018-07-29	08:29:19	8:29:19
Site 007	raccoon	2018-07-30 03:55:51	2018-07-30	03:55:51	3:55:51
Site 007	raccoon	2018-07-30 22:12:34	2018-07-30	22:12:34	22:12:34
Site 007	raccoon	2018-07-31 20:08:52	2018-07-31	20:08:52	20:08:52
Site 007	raccoon	2018-08-01 12:31:08	2018-08-01	12:31:08	12:31:08
Site 007	raccoon	2018-08-01 21:31:53	2018-08-01	21:31:53	21:31:53
Site 007	raccoon	2018-08-02 04:16:26	2018-08-02	04:16:26	4:16:26
Site 007	raccoon	2018-08-02 19:56:41	2018-08-02	19:56:41	19:56:41
Site 007	raccoon	2018-08-04 21:53:06	2018-08-04	21:53:06	21:53:06
Site 007	raccoon	2018-08-05 04:21:50	2018-08-05	04:21:50	4:21:50
Site 007	raccoon	2018-08-06 22:37:23	2018-08-06	22:37:23	22:37:23
Site 007	raccoon	2018-08-06 23:15:45	2018-08-06	23:15:45	23:15:45
Site 007	raccoon	2018-08-08 03:06:42	2018-08-08	03:06:42	3:06:42
Site 007	raccoon	2018-08-09 00:28:38	2018-08-09	00:28:38	0:28:38
Site 007	raccoon	2018-08-09 02:25:32	2018-08-09	02:25:32	2:25:32
Site 007	raccoon	2018-08-11 02:32:25	2018-08-11	02:32:25	2:32:25
Site 007	raccoon	2018-08-11 03:05:54	2018-08-11	03:05:54	3:05:54
Site 007	raccoon	2018-08-11 06:13:49	2018-08-11	06:13:49	6:13:49
Site 007	raccoon	2018-08-12 04:45:50	2018-08-12	04:45:50	4:45:50
Site 007	raccoon	2018-08-14 04:34:31	2018-08-14	04:34:31	4:34:31
Site 007	raccoon	2018-08-16 02:44:06	2018-08-16	02:44:06	2:44:06
Site 007	raccoon	2018-08-18 02:03:56	2018-08-18	02:03:56	2:03:56
Site 007	raccoon	2018-08-19 00:12:14	2018-08-19	00:12:14	0:12:14
Site 007	raccoon	2018-08-20 01:24:21	2018-08-20	01:24:21	1:24:21
Site 007	raccoon	2018-08-24 00:58:03	2018-08-24	00:58:03	0:58:03
Site 007	raccoon	2018-08-24 21:58:28	2018-08-24	21:58:28	21:58:28
Site 007	raccoon	2018-08-31 07:10:21	2018-08-31	07:10:21	7:10:21
Site 007	raccoon	2018-09-07 20:07:35	2018-09-07	20:07:35	20:07:35
Site 007	raccoon	2018-09-10 01:28:47	2018-09-10	01:28:47	1:28:47
Site 007	raccoon	2018-09-10 04:32:28	2018-09-10	04:32:28	4:32:28
Site 007	raccoon	2018-09-15 05:51:24	2018-09-15	05:51:24	5:51:24
Site 007	raccoon	2018-09-21 05:51:14	2018-09-21	05:51:14	5:51:14
Site 007	raccoon	2018-09-26 23:39:16	2018-09-26	23:39:16	23:39:16
Site 007	raccoon	2018-09-27 00:12:46	2018-09-27	00:12:46	0:12:46
Site 007	raccoon	2018-09-28 03:47:58	2018-09-28	03:47:58	3:47:58
Site 007	raccoon	2018-09-28 06:54:49	2018-09-28	06:54:49	6:54:49
Site 007	raccoon	2018-09-29 20:23:12	2018-09-29	20:23:12	20:23:12
Site 007	raccoon	2018-10-01 03:39:27	2018-10-01	03:39:27	3:39:27
Site 007	raccoon	2018-10-05 22:09:59	2018-10-05	22:09:59	22:09:59
Site 007	raccoon	2018-10-06 01:56:28	2018-10-06	01:56:28	1:56:28
Site 007	raccoon	2018-10-07 01:23:01	2018-10-07	01:23:01	1:23:01
Site 007	raccoon	2018-10-07 04:42:47	2018-10-07	04:42:47	4:42:47
Site 007	raccoon	2018-10-07 21:25:58	2018-10-07	21:25:58	21:25:58
Site 007	raccoon	2018-10-10 20:03:12	2018-10-10	20:03:12	20:03:12
Site 007	raccoon	2018-10-10 21:29:08	2018-10-10	21:29:08	21:29:08
Site 007	raccoon	2018-10-11 21:06:10	2018-10-11	21:06:10	21:06:10
Site 007	raccoon	2018-10-12 06:14:08	2018-10-12	06:14:08	6:14:08
Site 007	raccoon	2018-10-16 04:25:31	2018-10-16	04:25:31	4:25:31
Site 007	raccoon	2018-10-16 20:26:36	2018-10-16	20:26:36	20:26:36
Site 007	raccoon	2018-10-17 19:55:22	2018-10-17	19:55:22	19:55:22
Site 007	raccoon	2018-10-19 03:49:59	2018-10-19	03:49:59	3:49:59
Site 007	raccoon	2018-10-19 20:49:52	2018-10-19	20:49:52	20:49:52
Site 007	raccoon	2018-10-19 22:20:50	2018-10-19	22:20:50	22:20:50
Site 007	raccoon	2018-10-19 22:57:17	2018-10-19	22:57:17	22:57:17
Site 007	raccoon	2018-10-22 20:51:04	2018-10-22	20:51:04	20:51:04
Site 007	raccoon	2018-10-23 06:33:30	2018-10-23	06:33:30	6:33:30
Site 007	raccoon	2018-10-24 00:45:34	2018-10-24	00:45:34	0:45:34
Site 007	raccoon	2018-10-25 05:02:52	2018-10-25	05:02:52	5:02:52
Site 007	raccoon	2018-10-25 06:05:57	2018-10-25	06:05:57	6:05:57
Site 007	raccoon	2018-10-25 19:44:06	2018-10-25	19:44:06	19:44:06
Site 007	raccoon	2018-10-25 22:57:19	2018-10-25	22:57:19	22:57:19
Site 007	raccoon	2018-10-26 22:44:08	2018-10-26	22:44:08	22:44:08
Site 007	raccoon	2018-10-27 20:03:19	2018-10-27	20:03:19	20:03:19
Site 007	raccoon	2018-10-29 05:44:56	2018-10-29	05:44:56	5:44:56
Site 007	raccoon	2018-10-29 20:38:52	2018-10-29	20:38:52	20:38:52
Site 007	raccoon	2018-11-01 01:00:37	2018-11-01	01:00:37	1:00:37
Site 007	raccoon	2018-11-01 20:50:41	2018-11-01	20:50:41	20:50:41
Site 007	raccoon	2018-11-02 19:05:16	2018-11-02	19:05:16	19:05:16
Site 007	raccoon	2018-11-03 19:02:39	2018-11-03	19:02:39	19:02:39
Site 007	raccoon	2018-11-04 01:16:37	2018-11-04	01:16:37	1:16:37
Site 007	raccoon	2018-11-04 03:50:13	2018-11-04	03:50:13	3:50:13
Site 007	raccoon	2018-11-06 21:37:58	2018-11-06	21:37:58	21:37:58
Site 007	raccoon	2018-11-15 03:36:46	2018-11-15	03:36:46	3:36:46
Site 007	raccoon	2018-11-16 05:37:59	2018-11-16	05:37:59	5:37:59
Site 007	raccoon	2018-11-22 21:33:41	2018-11-22	21:33:41	21:33:41
Site 007	raccoon	2018-11-30 20:24:39	2018-11-30	20:24:39	20:24:39
Site 007	raccoon	2018-12-01 05:29:42	2018-12-01	05:29:42	5:29:42
Site 007	raccoon	2018-12-02 20:34:39	2018-12-02	20:34:39	20:34:39
Site 007	raccoon	2018-12-04 01:57:06	2018-12-04	01:57:06	1:57:06
Site 007	raccoon	2018-12-05 23:14:50	2018-12-05	23:14:50	23:14:50
Site 007	raccoon	2018-12-08 20:08:04	2018-12-08	20:08:04	20:08:04
Site 007	raccoon	2018-12-11 23:29:39	2018-12-11	23:29:39	23:29:39
Site 007	raccoon	2018-12-18 22:47:09	2018-12-18	22:47:09	22:47:09
Site 007	raccoon	2018-12-19 22:17:46	2018-12-19	22:17:46	22:17:46
Site 007	raccoon	2018-12-20 04:06:10	2018-12-20	04:06:10	4:06:10
Site 007	raccoon	2018-12-24 21:08:44	2018-12-24	21:08:44	21:08:44
Site 007	raccoon	2018-12-26 03:03:55	2018-12-26	03:03:55	3:03:55
Site 007	raccoon	2018-12-29 04:12:23	2018-12-29	04:12:23	4:12:23
Site 007	raccoon	2019-01-04 07:48:42	2019-01-04	07:48:42	7:48:42
Site 007	raccoon	2019-01-06 03:43:11	2019-01-06	03:43:11	3:43:11
Site 007	raccoon	2019-01-08 06:11:20	2019-01-08	06:11:20	6:11:20
Site 007	raccoon	2019-01-17 23:19:31	2019-01-17	23:19:31	23:19:31
Site 007	raccoon	2019-01-18 03:47:12	2019-01-18	03:47:12	3:47:12
Site 007	raccoon	2019-01-20 07:00:26	2019-01-20	07:00:26	7:00:26
Site 007	raccoon	2019-01-20 20:15:12	2019-01-20	20:15:12	20:15:12
Site 007	raccoon	2019-01-21 00:24:48	2019-01-21	00:24:48	0:24:48
Site 007	raccoon	2019-01-21 08:29:50	2019-01-21	08:29:50	8:29:50
Site 007	raccoon	2019-01-22 05:03:06	2019-01-22	05:03:06	5:03:06
Site 007	raccoon	2019-01-22 08:47:51	2019-01-22	08:47:51	8:47:51
Site 007	raccoon	2019-01-22 22:31:27	2019-01-22	22:31:27	22:31:27
Site 007	raccoon	2019-01-23 00:55:05	2019-01-23	00:55:05	0:55:05
Site 007	raccoon	2019-01-23 22:15:30	2019-01-23	22:15:30	22:15:30
Site 007	striped skunk	2018-04-23 22:51:11	2018-04-23	22:51:11	22:51:11
Site 007	striped skunk	2018-04-24 21:12:17	2018-04-24	21:12:17	21:12:17
Site 007	striped skunk	2018-05-21 21:50:03	2018-05-21	21:50:03	21:50:03
Site 007	striped skunk	2018-05-23 22:22:23	2018-05-23	22:22:23	22:22:23
Site 007	striped skunk	2018-05-25 21:32:30	2018-05-25	21:32:30	21:32:30
Site 007	striped skunk	2018-05-26 04:03:13	2018-05-26	04:03:13	4:03:13
Site 007	striped skunk	2018-05-29 05:08:03	2018-05-29	05:08:03	5:08:03
Site 007	striped skunk	2018-05-31 21:27:46	2018-05-31	21:27:46	21:27:46
Site 007	striped skunk	2018-06-03 01:40:51	2018-06-03	01:40:51	1:40:51
Site 007	striped skunk	2018-06-03 22:04:31	2018-06-03	22:04:31	22:04:31
Site 007	striped skunk	2018-06-06 03:43:13	2018-06-06	03:43:13	3:43:13
Site 007	striped skunk	2018-06-13 05:00:04	2018-06-13	05:00:04	5:00:04
Site 007	striped skunk	2018-06-13 22:49:50	2018-06-13	22:49:50	22:49:50
Site 007	striped skunk	2018-06-25 03:43:37	2018-06-25	03:43:37	3:43:37
Site 007	striped skunk	2018-06-26 03:28:09	2018-06-26	03:28:09	3:28:09
Site 007	striped skunk	2018-06-28 04:28:26	2018-06-28	04:28:26	4:28:26
Site 007	striped skunk	2018-07-01 21:43:21	2018-07-01	21:43:21	21:43:21
Site 007	striped skunk	2018-07-11 02:24:38	2018-07-11	02:24:38	2:24:38
Site 007	striped skunk	2018-07-12 04:52:38	2018-07-12	04:52:38	4:52:38
Site 007	striped skunk	2018-07-15 02:41:56	2018-07-15	02:41:56	2:41:56
Site 007	striped skunk	2018-07-15 23:53:39	2018-07-15	23:53:39	23:53:39
Site 007	striped skunk	2018-07-22 00:16:49	2018-07-22	00:16:49	0:16:49
Site 007	striped skunk	2018-07-26 04:26:12	2018-07-26	04:26:12	4:26:12
Site 007	striped skunk	2018-07-30 05:10:26	2018-07-30	05:10:26	5:10:26
Site 007	striped skunk	2018-08-04 04:58:02	2018-08-04	04:58:02	4:58:02
Site 007	striped skunk	2018-08-13 04:29:07	2018-08-13	04:29:07	4:29:07
Site 007	striped skunk	2018-08-14 20:43:50	2018-08-14	20:43:50	20:43:50
Site 007	striped skunk	2018-08-16 05:22:15	2018-08-16	05:22:15	5:22:15
Site 007	striped skunk	2018-08-16 19:56:38	2018-08-16	19:56:38	19:56:38
Site 007	striped skunk	2018-08-20 04:24:36	2018-08-20	04:24:36	4:24:36
Site 007	striped skunk	2018-08-21 20:50:01	2018-08-21	20:50:01	20:50:01
Site 007	striped skunk	2018-08-21 23:47:56	2018-08-21	23:47:56	23:47:56
Site 007	striped skunk	2018-08-26 02:11:17	2018-08-26	02:11:17	2:11:17
Site 007	striped skunk	2018-08-26 03:41:50	2018-08-26	03:41:50	3:41:50
Site 007	striped skunk	2018-08-26 20:20:20	2018-08-26	20:20:20	20:20:20
Site 007	striped skunk	2018-08-27 21:00:54	2018-08-27	21:00:54	21:00:54
Site 007	striped skunk	2018-08-28 23:35:37	2018-08-28	23:35:37	23:35:37
Site 007	striped skunk	2018-08-31 03:17:03	2018-08-31	03:17:03	3:17:03
Site 007	striped skunk	2018-09-01 04:44:32	2018-09-01	04:44:32	4:44:32
Site 007	striped skunk	2018-09-02 02:45:17	2018-09-02	02:45:17	2:45:17
Site 007	striped skunk	2018-09-02 20:09:13	2018-09-02	20:09:13	20:09:13
Site 007	striped skunk	2018-09-05 03:11:52	2018-09-05	03:11:52	3:11:52
Site 007	striped skunk	2018-09-06 02:19:26	2018-09-06	02:19:26	2:19:26
Site 007	striped skunk	2018-09-06 04:27:02	2018-09-06	04:27:02	4:27:02
Site 007	striped skunk	2018-09-06 23:58:24	2018-09-06	23:58:24	23:58:24
Site 007	striped skunk	2018-09-07 05:53:13	2018-09-07	05:53:13	5:53:13
Site 007	striped skunk	2018-09-08 00:26:00	2018-09-08	00:26:00	0:26:00
Site 007	striped skunk	2018-09-09 02:26:06	2018-09-09	02:26:06	2:26:06
Site 007	striped skunk	2018-09-09 19:56:26	2018-09-09	19:56:26	19:56:26
Site 007	striped skunk	2018-09-09 23:38:35	2018-09-09	23:38:35	23:38:35
Site 007	striped skunk	2018-09-10 22:03:43	2018-09-10	22:03:43	22:03:43
Site 007	striped skunk	2018-09-11 04:10:35	2018-09-11	04:10:35	4:10:35
Site 007	striped skunk	2018-09-11 19:52:43	2018-09-11	19:52:43	19:52:43
Site 007	striped skunk	2018-09-11 22:03:45	2018-09-11	22:03:45	22:03:45
Site 007	striped skunk	2018-09-12 04:43:01	2018-09-12	04:43:01	4:43:01
Site 007	striped skunk	2018-09-15 19:47:28	2018-09-15	19:47:28	19:47:28
Site 007	striped skunk	2018-09-17 06:11:16	2018-09-17	06:11:16	6:11:16
Site 007	striped skunk	2018-09-20 03:22:29	2018-09-20	03:22:29	3:22:29
Site 007	striped skunk	2018-09-21 00:32:26	2018-09-21	00:32:26	0:32:26
Site 007	striped skunk	2018-09-21 01:12:13	2018-09-21	01:12:13	1:12:13
Site 007	striped skunk	2018-09-22 19:33:34	2018-09-22	19:33:34	19:33:34
Site 007	striped skunk	2018-09-23 06:09:31	2018-09-23	06:09:31	6:09:31
Site 007	striped skunk	2018-09-24 05:05:33	2018-09-24	05:05:33	5:05:33
Site 007	striped skunk	2018-09-25 06:18:51	2018-09-25	06:18:51	6:18:51
Site 007	striped skunk	2018-09-25 19:28:57	2018-09-25	19:28:57	19:28:57
Site 007	striped skunk	2018-09-26 04:06:09	2018-09-26	04:06:09	4:06:09
Site 007	striped skunk	2018-09-27 05:35:42	2018-09-27	05:35:42	5:35:42
Site 007	striped skunk	2018-09-30 06:21:56	2018-09-30	06:21:56	6:21:56
Site 007	striped skunk	2018-09-30 19:10:46	2018-09-30	19:10:46	19:10:46
Site 007	striped skunk	2018-09-30 19:46:37	2018-09-30	19:46:37	19:46:37
Site 007	striped skunk	2018-10-01 01:02:05	2018-10-01	01:02:05	1:02:05
Site 007	striped skunk	2018-10-01 06:07:08	2018-10-01	06:07:08	6:07:08
Site 007	striped skunk	2018-10-03 00:30:01	2018-10-03	00:30:01	0:30:01
Site 007	striped skunk	2018-10-04 05:49:11	2018-10-04	05:49:11	5:49:11
Site 007	striped skunk	2018-10-07 18:58:43	2018-10-07	18:58:43	18:58:43
Site 007	striped skunk	2018-10-09 20:08:39	2018-10-09	20:08:39	20:08:39
Site 007	striped skunk	2018-10-11 05:16:31	2018-10-11	05:16:31	5:16:31
Site 007	striped skunk	2018-10-11 06:02:33	2018-10-11	06:02:33	6:02:33
Site 007	striped skunk	2018-10-11 19:05:44	2018-10-11	19:05:44	19:05:44
Site 007	striped skunk	2018-10-11 22:23:47	2018-10-11	22:23:47	22:23:47
Site 007	striped skunk	2018-10-12 05:42:08	2018-10-12	05:42:08	5:42:08
Site 007	striped skunk	2018-10-12 19:39:06	2018-10-12	19:39:06	19:39:06
Site 007	striped skunk	2018-10-14 02:35:46	2018-10-14	02:35:46	2:35:46
Site 007	striped skunk	2018-10-14 05:04:06	2018-10-14	05:04:06	5:04:06
Site 007	striped skunk	2018-10-14 06:04:55	2018-10-14	06:04:55	6:04:55
Site 007	striped skunk	2018-10-15 03:09:01	2018-10-15	03:09:01	3:09:01
Site 007	striped skunk	2018-10-15 05:23:30	2018-10-15	05:23:30	5:23:30
Site 007	striped skunk	2018-10-15 19:51:34	2018-10-15	19:51:34	19:51:34
Site 007	striped skunk	2018-10-16 01:41:17	2018-10-16	01:41:17	1:41:17
Site 007	striped skunk	2018-10-17 01:33:18	2018-10-17	01:33:18	1:33:18
Site 007	striped skunk	2018-10-17 23:47:58	2018-10-17	23:47:58	23:47:58
Site 007	striped skunk	2018-10-18 02:56:08	2018-10-18	02:56:08	2:56:08
Site 007	striped skunk	2018-10-19 05:55:45	2018-10-19	05:55:45	5:55:45
Site 007	striped skunk	2018-10-19 21:06:26	2018-10-19	21:06:26	21:06:26
Site 007	striped skunk	2018-10-19 21:59:30	2018-10-19	21:59:30	21:59:30
Site 007	striped skunk	2018-10-23 02:06:27	2018-10-23	02:06:27	2:06:27
Site 007	striped skunk	2018-10-24 21:01:38	2018-10-24	21:01:38	21:01:38
Site 007	striped skunk	2018-10-31 22:10:30	2018-10-31	22:10:30	22:10:30
Site 007	striped skunk	2018-11-02 04:40:41	2018-11-02	04:40:41	4:40:41
Site 007	striped skunk	2018-11-04 05:31:57	2018-11-04	05:31:57	5:31:57
Site 007	striped skunk	2018-11-10 00:13:14	2018-11-10	00:13:14	0:13:14
Site 007	striped skunk	2018-11-13 02:23:30	2018-11-13	02:23:30	2:23:30
Site 007	striped skunk	2018-11-14 20:53:14	2018-11-14	20:53:14	20:53:14
Site 007	striped skunk	2018-11-19 05:39:29	2018-11-19	05:39:29	5:39:29
Site 007	striped skunk	2018-11-26 17:58:58	2018-11-26	17:58:58	17:58:58
Site 007	striped skunk	2018-11-28 23:02:30	2018-11-28	23:02:30	23:02:30
Site 007	striped skunk	2018-11-29 07:31:11	2018-11-29	07:31:11	7:31:11
Site 007	striped skunk	2018-12-05 00:34:05	2018-12-05	00:34:05	0:34:05
Site 007	striped skunk	2018-12-10 22:39:57	2018-12-10	22:39:57	22:39:57
Site 007	striped skunk	2018-12-12 03:41:07	2018-12-12	03:41:07	3:41:07
Site 007	striped skunk	2018-12-14 00:18:57	2018-12-14	00:18:57	0:18:57
Site 007	striped skunk	2018-12-14 04:48:30	2018-12-14	04:48:30	4:48:30
Site 007	striped skunk	2018-12-16 00:48:55	2018-12-16	00:48:55	0:48:55
Site 007	striped skunk	2018-12-18 03:42:45	2018-12-18	03:42:45	3:42:45
Site 007	striped skunk	2018-12-19 00:40:57	2018-12-19	00:40:57	0:40:57
Site 007	striped skunk	2018-12-19 02:56:18	2018-12-19	02:56:18	2:56:18
Site 007	striped skunk	2018-12-26 01:53:36	2018-12-26	01:53:36	1:53:36
Site 007	striped skunk	2018-12-29 21:09:22	2018-12-29	21:09:22	21:09:22
Site 007	striped skunk	2018-12-29 23:18:52	2018-12-29	23:18:52	23:18:52
Site 007	striped skunk	2019-01-03 02:09:10	2019-01-03	02:09:10	2:09:10
Site 007	striped skunk	2019-01-03 03:14:33	2019-01-03	03:14:33	3:14:33
Site 007	striped skunk	2019-01-03 06:03:02	2019-01-03	06:03:02	6:03:02
Site 007	striped skunk	2019-01-04 00:21:11	2019-01-04	00:21:11	0:21:11
Site 007	striped skunk	2019-01-05 00:53:37	2019-01-05	00:53:37	0:53:37
Site 007	striped skunk	2019-01-06 04:22:53	2019-01-06	04:22:53	4:22:53
Site 007	striped skunk	2019-01-12 01:57:24	2019-01-12	01:57:24	1:57:24
Site 007	striped skunk	2019-01-12 22:12:18	2019-01-12	22:12:18	22:12:18
Site 007	striped skunk	2019-01-15 00:50:28	2019-01-15	00:50:28	0:50:28
Site 007	striped skunk	2019-01-22 04:31:15	2019-01-22	04:31:15	4:31:15
Site 007	striped skunk	2019-01-22 05:14:27	2019-01-22	05:14:27	5:14:27
Site 007	striped skunk	2019-01-23 08:20:52	2019-01-23	08:20:52	8:20:52
Site 007	striped skunk	2019-01-27 01:41:17	2019-01-27	01:41:17	1:41:17
Site 007	striped skunk	2019-01-27 04:13:54	2019-01-27	04:13:54	4:13:54
Site 008	grey fox	2018-05-20 23:13:59	2018-05-20	23:13:59	23:13:59
Site 008	grey fox	2018-05-22 02:07:39	2018-05-22	02:07:39	2:07:39
Site 008	grey fox	2018-06-02 01:15:16	2018-06-02	01:15:16	1:15:16
Site 008	grey fox	2018-07-02 21:21:15	2018-07-02	21:21:15	21:21:15
Site 008	grey fox	2018-08-08 01:43:30	2018-08-08	01:43:30	1:43:30
Site 008	grey fox	2018-09-04 23:41:15	2018-09-04	23:41:15	23:41:15
Site 008	grey fox	2018-09-06 02:15:25	2018-09-06	02:15:25	2:15:25
Site 008	grey fox	2018-09-09 21:10:41	2018-09-09	21:10:41	21:10:41
Site 008	grey fox	2018-09-15 22:23:50	2018-09-15	22:23:50	22:23:50
Site 008	grey fox	2018-09-20 04:09:26	2018-09-20	04:09:26	4:09:26
Site 008	grey fox	2018-09-22 02:02:34	2018-09-22	02:02:34	2:02:34
Site 008	grey fox	2018-09-30 20:53:44	2018-09-30	20:53:44	20:53:44
Site 008	grey fox	2018-09-30 21:33:41	2018-09-30	21:33:41	21:33:41
Site 008	grey fox	2018-10-04 20:36:29	2018-10-04	20:36:29	20:36:29
Site 008	grey fox	2018-10-12 04:41:46	2018-10-12	04:41:46	4:41:46
Site 008	grey fox	2018-10-29 21:50:19	2018-10-29	21:50:19	21:50:19
Site 008	grey fox	2018-10-29 22:24:18	2018-10-29	22:24:18	22:24:18
Site 008	grey fox	2018-10-30 06:00:42	2018-10-30	06:00:42	6:00:42
Site 008	grey fox	2018-10-30 22:47:03	2018-10-30	22:47:03	22:47:03
Site 008	grey fox	2018-11-02 03:37:30	2018-11-02	03:37:30	3:37:30
Site 008	grey fox	2018-11-02 05:18:34	2018-11-02	05:18:34	5:18:34
Site 008	grey fox	2018-11-02 18:57:22	2018-11-02	18:57:22	18:57:22
Site 008	grey fox	2018-11-02 22:10:40	2018-11-02	22:10:40	22:10:40
Site 008	grey fox	2018-11-03 00:20:44	2018-11-03	00:20:44	0:20:44
Site 008	grey fox	2018-11-03 00:57:53	2018-11-03	00:57:53	0:57:53
Site 008	grey fox	2018-11-03 05:26:15	2018-11-03	05:26:15	5:26:15
Site 008	grey fox	2018-11-03 06:10:43	2018-11-03	06:10:43	6:10:43
Site 008	grey fox	2018-11-03 21:19:35	2018-11-03	21:19:35	21:19:35
Site 008	grey fox	2018-11-03 23:40:08	2018-11-03	23:40:08	23:40:08
Site 008	grey fox	2018-11-04 19:32:05	2018-11-04	19:32:05	19:32:05
Site 008	grey fox	2018-11-04 23:17:58	2018-11-04	23:17:58	23:17:58
Site 008	grey fox	2018-11-05 00:15:11	2018-11-05	00:15:11	0:15:11
Site 008	grey fox	2018-11-05 05:00:48	2018-11-05	05:00:48	5:00:48
Site 008	grey fox	2018-11-05 07:20:37	2018-11-05	07:20:37	7:20:37
Site 008	grey fox	2018-11-05 20:44:24	2018-11-05	20:44:24	20:44:24
Site 008	grey fox	2018-11-06 04:55:29	2018-11-06	04:55:29	4:55:29
Site 008	grey fox	2018-11-06 05:41:51	2018-11-06	05:41:51	5:41:51
Site 008	grey fox	2018-11-06 18:54:28	2018-11-06	18:54:28	18:54:28
Site 008	grey fox	2018-11-06 21:24:28	2018-11-06	21:24:28	21:24:28
Site 008	grey fox	2018-11-07 22:41:24	2018-11-07	22:41:24	22:41:24
Site 008	grey fox	2018-11-09 02:52:21	2018-11-09	02:52:21	2:52:21
Site 008	grey fox	2018-11-10 05:32:38	2018-11-10	05:32:38	5:32:38
Site 008	grey fox	2018-11-10 19:53:33	2018-11-10	19:53:33	19:53:33
Site 008	grey fox	2018-11-10 23:06:37	2018-11-10	23:06:37	23:06:37
Site 008	grey fox	2018-11-11 00:43:34	2018-11-11	00:43:34	0:43:34
Site 008	grey fox	2018-11-11 05:40:16	2018-11-11	05:40:16	5:40:16
Site 008	grey fox	2018-11-11 20:21:46	2018-11-11	20:21:46	20:21:46
Site 008	grey fox	2018-11-11 23:45:04	2018-11-11	23:45:04	23:45:04
Site 008	grey fox	2018-11-12 00:45:16	2018-11-12	00:45:16	0:45:16
Site 008	grey fox	2018-11-12 06:00:46	2018-11-12	06:00:46	6:00:46
Site 008	grey fox	2018-11-13 22:11:38	2018-11-13	22:11:38	22:11:38
Site 008	grey fox	2018-11-14 18:38:23	2018-11-14	18:38:23	18:38:23
Site 008	grey fox	2018-11-15 20:17:41	2018-11-15	20:17:41	20:17:41
Site 008	grey fox	2018-11-16 19:44:09	2018-11-16	19:44:09	19:44:09
Site 008	grey fox	2018-11-19 06:40:17	2018-11-19	06:40:17	6:40:17
Site 008	grey fox	2018-11-20 18:56:30	2018-11-20	18:56:30	18:56:30
Site 008	grey fox	2018-11-22 02:10:41	2018-11-22	02:10:41	2:10:41
Site 008	grey fox	2018-11-22 22:52:36	2018-11-22	22:52:36	22:52:36
Site 008	grey fox	2018-11-24 05:37:22	2018-11-24	05:37:22	5:37:22
Site 008	grey fox	2018-11-24 18:44:42	2018-11-24	18:44:42	18:44:42
Site 008	grey fox	2018-11-26 20:36:51	2018-11-26	20:36:51	20:36:51
Site 008	grey fox	2018-11-28 18:57:24	2018-11-28	18:57:24	18:57:24
Site 008	grey fox	2018-11-29 19:29:29	2018-11-29	19:29:29	19:29:29
Site 008	grey fox	2018-12-04 18:47:51	2018-12-04	18:47:51	18:47:51
Site 008	grey fox	2018-12-04 20:00:06	2018-12-04	20:00:06	20:00:06
Site 008	grey fox	2018-12-05 19:59:23	2018-12-05	19:59:23	19:59:23
Site 008	grey fox	2018-12-06 21:04:30	2018-12-06	21:04:30	21:04:30
Site 008	grey fox	2018-12-15 00:47:29	2018-12-15	00:47:29	0:47:29
Site 008	grey fox	2018-12-16 02:50:30	2018-12-16	02:50:30	2:50:30
Site 008	grey fox	2018-12-19 23:29:09	2018-12-19	23:29:09	23:29:09
Site 008	grey fox	2018-12-20 18:00:29	2018-12-20	18:00:29	18:00:29
Site 008	grey fox	2018-12-21 20:12:38	2018-12-21	20:12:38	20:12:38
Site 008	grey fox	2018-12-21 22:33:50	2018-12-21	22:33:50	22:33:50
Site 008	grey fox	2018-12-23 05:34:32	2018-12-23	05:34:32	5:34:32
Site 008	grey fox	2018-12-26 01:36:29	2018-12-26	01:36:29	1:36:29
Site 008	grey fox	2018-12-27 05:46:46	2018-12-27	05:46:46	5:46:46
Site 008	grey fox	2018-12-28 21:30:05	2018-12-28	21:30:05	21:30:05
Site 008	grey fox	2018-12-29 05:06:07	2018-12-29	05:06:07	5:06:07
Site 008	grey fox	2018-12-31 20:42:35	2018-12-31	20:42:35	20:42:35
Site 008	grey fox	2019-01-02 00:47:19	2019-01-02	00:47:19	0:47:19
Site 008	grey fox	2019-01-04 23:36:21	2019-01-04	23:36:21	23:36:21
Site 008	grey fox	2019-01-05 01:25:08	2019-01-05	01:25:08	1:25:08
Site 008	grey fox	2019-01-06 20:44:41	2019-01-06	20:44:41	20:44:41
Site 008	grey fox	2019-01-11 05:01:56	2019-01-11	05:01:56	5:01:56
Site 008	grey fox	2019-01-14 23:12:26	2019-01-14	23:12:26	23:12:26
Site 008	grey fox	2019-01-19 20:11:45	2019-01-19	20:11:45	20:11:45
Site 008	grey fox	2019-01-21 19:49:30	2019-01-21	19:49:30	19:49:30
Site 008	opossum	2018-06-02 22:24:39	2018-06-02	22:24:39	22:24:39
Site 008	opossum	2018-07-03 23:09:33	2018-07-03	23:09:33	23:09:33
Site 008	opossum	2018-07-10 02:30:55	2018-07-10	02:30:55	2:30:55
Site 008	opossum	2018-07-10 03:55:34	2018-07-10	03:55:34	3:55:34
Site 008	opossum	2018-07-10 04:53:47	2018-07-10	04:53:47	4:53:47
Site 008	opossum	2018-07-30 22:07:23	2018-07-30	22:07:23	22:07:23
Site 008	opossum	2018-07-31 02:26:57	2018-07-31	02:26:57	2:26:57
Site 008	opossum	2018-08-04 22:36:54	2018-08-04	22:36:54	22:36:54
Site 008	opossum	2018-08-05 00:20:03	2018-08-05	00:20:03	0:20:03
Site 008	opossum	2018-08-06 02:24:24	2018-08-06	02:24:24	2:24:24
Site 008	opossum	2018-08-09 02:17:06	2018-08-09	02:17:06	2:17:06
Site 008	opossum	2018-08-12 02:50:50	2018-08-12	02:50:50	2:50:50
Site 008	opossum	2018-08-14 03:58:32	2018-08-14	03:58:32	3:58:32
Site 008	opossum	2018-08-22 01:46:47	2018-08-22	01:46:47	1:46:47
Site 008	opossum	2018-08-23 01:38:33	2018-08-23	01:38:33	1:38:33
Site 008	opossum	2018-08-25 21:35:40	2018-08-25	21:35:40	21:35:40
Site 008	opossum	2018-08-26 02:08:05	2018-08-26	02:08:05	2:08:05
Site 008	opossum	2018-08-26 03:16:57	2018-08-26	03:16:57	3:16:57
Site 008	opossum	2018-08-26 05:20:51	2018-08-26	05:20:51	5:20:51
Site 008	opossum	2018-08-27 04:36:17	2018-08-27	04:36:17	4:36:17
Site 008	opossum	2018-08-28 00:41:30	2018-08-28	00:41:30	0:41:30
Site 008	opossum	2018-08-28 01:14:52	2018-08-28	01:14:52	1:14:52
Site 008	opossum	2018-09-22 02:56:24	2018-09-22	02:56:24	2:56:24
Site 008	opossum	2018-09-26 02:03:35	2018-09-26	02:03:35	2:03:35
Site 008	opossum	2018-09-27 04:36:56	2018-09-27	04:36:56	4:36:56
Site 008	opossum	2018-10-01 01:35:06	2018-10-01	01:35:06	1:35:06
Site 008	opossum	2018-10-06 04:58:19	2018-10-06	04:58:19	4:58:19
Site 008	opossum	2018-10-16 01:56:35	2018-10-16	01:56:35	1:56:35
Site 008	opossum	2018-10-21 20:19:52	2018-10-21	20:19:52	20:19:52
Site 008	opossum	2018-10-28 22:32:07	2018-10-28	22:32:07	22:32:07
Site 008	opossum	2018-10-31 02:06:08	2018-10-31	02:06:08	2:06:08
Site 008	opossum	2018-10-31 02:48:22	2018-10-31	02:48:22	2:48:22
Site 008	opossum	2018-11-15 23:01:45	2018-11-15	23:01:45	23:01:45
Site 008	opossum	2018-11-15 23:49:30	2018-11-15	23:49:30	23:49:30
Site 008	opossum	2018-11-16 00:22:36	2018-11-16	00:22:36	0:22:36
Site 008	opossum	2018-11-19 07:32:11	2018-11-19	07:32:11	7:32:11
Site 008	opossum	2018-11-22 21:25:51	2018-11-22	21:25:51	21:25:51
Site 008	opossum	2018-11-22 22:15:23	2018-11-22	22:15:23	22:15:23
Site 008	opossum	2018-11-27 01:16:26	2018-11-27	01:16:26	1:16:26
Site 008	opossum	2018-11-27 21:31:49	2018-11-27	21:31:49	21:31:49
Site 008	opossum	2018-11-30 23:56:50	2018-11-30	23:56:50	23:56:50
Site 008	opossum	2018-12-01 00:48:31	2018-12-01	00:48:31	0:48:31
Site 008	opossum	2018-12-10 02:42:32	2018-12-10	02:42:32	2:42:32
Site 008	raccoon	2018-05-05 03:20:07	2018-05-05	03:20:07	3:20:07
Site 008	raccoon	2018-05-22 22:23:23	2018-05-22	22:23:23	22:23:23
Site 008	raccoon	2018-05-24 23:24:59	2018-05-24	23:24:59	23:24:59
Site 008	raccoon	2018-05-27 22:58:03	2018-05-27	22:58:03	22:58:03
Site 008	raccoon	2018-05-28 22:18:55	2018-05-28	22:18:55	22:18:55
Site 008	raccoon	2018-05-29 03:44:01	2018-05-29	03:44:01	3:44:01
Site 008	raccoon	2018-06-06 02:00:39	2018-06-06	02:00:39	2:00:39
Site 008	raccoon	2018-06-06 23:30:01	2018-06-06	23:30:01	23:30:01
Site 008	raccoon	2018-06-08 01:04:45	2018-06-08	01:04:45	1:04:45
Site 008	raccoon	2018-06-15 23:31:23	2018-06-15	23:31:23	23:31:23
Site 008	raccoon	2018-06-18 22:34:17	2018-06-18	22:34:17	22:34:17
Site 008	raccoon	2018-06-25 01:44:38	2018-06-25	01:44:38	1:44:38
Site 008	raccoon	2018-06-25 02:54:59	2018-06-25	02:54:59	2:54:59
Site 008	raccoon	2018-07-10 01:13:32	2018-07-10	01:13:32	1:13:32
Site 008	raccoon	2018-07-12 01:50:27	2018-07-12	01:50:27	1:50:27
Site 008	raccoon	2018-07-15 01:29:31	2018-07-15	01:29:31	1:29:31
Site 008	raccoon	2018-07-15 03:58:46	2018-07-15	03:58:46	3:58:46
Site 008	raccoon	2018-07-16 01:54:07	2018-07-16	01:54:07	1:54:07
Site 008	raccoon	2018-07-21 03:52:20	2018-07-21	03:52:20	3:52:20
Site 008	raccoon	2018-07-21 23:23:54	2018-07-21	23:23:54	23:23:54
Site 008	raccoon	2018-07-23 04:17:05	2018-07-23	04:17:05	4:17:05
Site 008	raccoon	2018-07-24 02:08:39	2018-07-24	02:08:39	2:08:39
Site 008	raccoon	2018-07-25 01:28:23	2018-07-25	01:28:23	1:28:23
Site 008	raccoon	2018-07-25 02:53:30	2018-07-25	02:53:30	2:53:30
Site 008	raccoon	2018-07-25 22:34:52	2018-07-25	22:34:52	22:34:52
Site 008	raccoon	2018-07-26 00:31:13	2018-07-26	00:31:13	0:31:13
Site 008	raccoon	2018-07-26 03:28:09	2018-07-26	03:28:09	3:28:09
Site 008	raccoon	2018-07-26 04:43:50	2018-07-26	04:43:50	4:43:50
Site 008	raccoon	2018-07-27 04:40:49	2018-07-27	04:40:49	4:40:49
Site 008	raccoon	2018-07-28 00:33:02	2018-07-28	00:33:02	0:33:02
Site 008	raccoon	2018-07-28 20:50:28	2018-07-28	20:50:28	20:50:28
Site 008	raccoon	2018-07-29 23:10:41	2018-07-29	23:10:41	23:10:41
Site 008	raccoon	2018-07-30 01:26:17	2018-07-30	01:26:17	1:26:17
Site 008	raccoon	2018-07-30 03:48:05	2018-07-30	03:48:05	3:48:05
Site 008	raccoon	2018-08-02 04:31:35	2018-08-02	04:31:35	4:31:35
Site 008	raccoon	2018-08-04 02:18:51	2018-08-04	02:18:51	2:18:51
Site 008	raccoon	2018-08-04 04:35:52	2018-08-04	04:35:52	4:35:52
Site 008	raccoon	2018-08-06 01:54:46	2018-08-06	01:54:46	1:54:46
Site 008	raccoon	2018-08-07 03:19:01	2018-08-07	03:19:01	3:19:01
Site 008	raccoon	2018-08-08 01:03:26	2018-08-08	01:03:26	1:03:26
Site 008	raccoon	2018-08-09 00:41:26	2018-08-09	00:41:26	0:41:26
Site 008	raccoon	2018-08-11 23:19:22	2018-08-11	23:19:22	23:19:22
Site 008	raccoon	2018-08-14 00:30:06	2018-08-14	00:30:06	0:30:06
Site 008	raccoon	2018-08-15 02:17:25	2018-08-15	02:17:25	2:17:25
Site 008	raccoon	2018-08-16 03:33:45	2018-08-16	03:33:45	3:33:45
Site 008	raccoon	2018-08-16 04:23:21	2018-08-16	04:23:21	4:23:21
Site 008	raccoon	2018-08-17 01:56:56	2018-08-17	01:56:56	1:56:56
Site 008	raccoon	2018-08-19 03:10:16	2018-08-19	03:10:16	3:10:16
Site 008	raccoon	2018-08-20 04:17:25	2018-08-20	04:17:25	4:17:25
Site 008	raccoon	2018-08-21 00:37:29	2018-08-21	00:37:29	0:37:29
Site 008	raccoon	2018-08-21 04:21:45	2018-08-21	04:21:45	4:21:45
Site 008	raccoon	2018-08-23 22:01:42	2018-08-23	22:01:42	22:01:42
Site 008	raccoon	2018-08-23 23:09:25	2018-08-23	23:09:25	23:09:25
Site 008	raccoon	2018-08-24 02:36:34	2018-08-24	02:36:34	2:36:34
Site 008	raccoon	2018-08-24 23:58:29	2018-08-24	23:58:29	23:58:29
Site 008	raccoon	2018-08-25 02:32:42	2018-08-25	02:32:42	2:32:42
Site 008	raccoon	2018-08-25 23:22:11	2018-08-25	23:22:11	23:22:11
Site 008	raccoon	2018-08-26 03:38:29	2018-08-26	03:38:29	3:38:29
Site 008	raccoon	2018-08-29 02:24:40	2018-08-29	02:24:40	2:24:40
Site 008	raccoon	2018-08-29 03:09:43	2018-08-29	03:09:43	3:09:43
Site 008	raccoon	2018-09-01 01:24:43	2018-09-01	01:24:43	1:24:43
Site 008	raccoon	2018-09-01 02:48:43	2018-09-01	02:48:43	2:48:43
Site 008	raccoon	2018-09-01 04:43:21	2018-09-01	04:43:21	4:43:21
Site 008	raccoon	2018-09-01 22:02:30	2018-09-01	22:02:30	22:02:30
Site 008	raccoon	2018-09-02 01:25:41	2018-09-02	01:25:41	1:25:41
Site 008	raccoon	2018-09-03 00:53:56	2018-09-03	00:53:56	0:53:56
Site 008	raccoon	2018-09-03 04:18:25	2018-09-03	04:18:25	4:18:25
Site 008	raccoon	2018-09-06 03:50:52	2018-09-06	03:50:52	3:50:52
Site 008	raccoon	2018-09-06 04:49:21	2018-09-06	04:49:21	4:49:21
Site 008	raccoon	2018-09-06 21:48:43	2018-09-06	21:48:43	21:48:43
Site 008	raccoon	2018-09-07 00:16:19	2018-09-07	00:16:19	0:16:19
Site 008	raccoon	2018-09-08 01:05:42	2018-09-08	01:05:42	1:05:42
Site 008	raccoon	2018-09-09 03:53:10	2018-09-09	03:53:10	3:53:10
Site 008	raccoon	2018-09-09 04:42:55	2018-09-09	04:42:55	4:42:55
Site 008	raccoon	2018-09-10 01:23:05	2018-09-10	01:23:05	1:23:05
Site 008	raccoon	2018-09-12 01:36:48	2018-09-12	01:36:48	1:36:48
Site 008	raccoon	2018-09-14 04:24:12	2018-09-14	04:24:12	4:24:12
Site 008	raccoon	2018-09-14 22:27:33	2018-09-14	22:27:33	22:27:33
Site 008	raccoon	2018-09-17 01:04:43	2018-09-17	01:04:43	1:04:43
Site 008	raccoon	2018-09-17 23:40:32	2018-09-17	23:40:32	23:40:32
Site 008	raccoon	2018-09-18 03:32:06	2018-09-18	03:32:06	3:32:06
Site 008	raccoon	2018-09-19 23:25:08	2018-09-19	23:25:08	23:25:08
Site 008	raccoon	2018-09-21 22:06:47	2018-09-21	22:06:47	22:06:47
Site 008	raccoon	2018-09-23 03:18:04	2018-09-23	03:18:04	3:18:04
Site 008	raccoon	2018-09-23 23:05:16	2018-09-23	23:05:16	23:05:16
Site 008	raccoon	2018-09-25 01:57:35	2018-09-25	01:57:35	1:57:35
Site 008	raccoon	2018-09-27 02:47:48	2018-09-27	02:47:48	2:47:48
Site 008	raccoon	2018-09-28 01:31:22	2018-09-28	01:31:22	1:31:22
Site 008	raccoon	2018-09-28 03:30:23	2018-09-28	03:30:23	3:30:23
Site 008	raccoon	2018-09-28 04:11:31	2018-09-28	04:11:31	4:11:31
Site 008	raccoon	2018-09-29 03:36:12	2018-09-29	03:36:12	3:36:12
Site 008	raccoon	2018-09-29 23:31:12	2018-09-29	23:31:12	23:31:12
Site 008	raccoon	2018-10-02 02:02:50	2018-10-02	02:02:50	2:02:50
Site 008	raccoon	2018-10-03 00:22:18	2018-10-03	00:22:18	0:22:18
Site 008	raccoon	2018-10-05 02:06:30	2018-10-05	02:06:30	2:06:30
Site 008	raccoon	2018-10-08 00:33:54	2018-10-08	00:33:54	0:33:54
Site 008	raccoon	2018-10-08 02:25:34	2018-10-08	02:25:34	2:25:34
Site 008	raccoon	2018-10-11 02:03:18	2018-10-11	02:03:18	2:03:18
Site 008	raccoon	2018-10-11 04:55:47	2018-10-11	04:55:47	4:55:47
Site 008	raccoon	2018-10-11 06:25:31	2018-10-11	06:25:31	6:25:31
Site 008	raccoon	2018-10-12 02:06:00	2018-10-12	02:06:00	2:06:00
Site 008	raccoon	2018-10-13 04:05:05	2018-10-13	04:05:05	4:05:05
Site 008	raccoon	2018-10-14 00:57:06	2018-10-14	00:57:06	0:57:06
Site 008	raccoon	2018-10-15 04:19:49	2018-10-15	04:19:49	4:19:49
Site 008	raccoon	2018-10-20 03:19:10	2018-10-20	03:19:10	3:19:10
Site 008	raccoon	2018-10-22 02:41:36	2018-10-22	02:41:36	2:41:36
Site 008	raccoon	2018-10-23 22:41:30	2018-10-23	22:41:30	22:41:30
Site 008	raccoon	2018-10-24 04:57:26	2018-10-24	04:57:26	4:57:26
Site 008	raccoon	2018-10-24 20:02:47	2018-10-24	20:02:47	20:02:47
Site 008	raccoon	2018-10-28 22:04:03	2018-10-28	22:04:03	22:04:03
Site 008	raccoon	2018-10-28 22:56:41	2018-10-28	22:56:41	22:56:41
Site 008	raccoon	2018-10-30 01:16:35	2018-10-30	01:16:35	1:16:35
Site 008	raccoon	2018-11-02 03:21:26	2018-11-02	03:21:26	3:21:26
Site 008	raccoon	2018-11-05 05:08:46	2018-11-05	05:08:46	5:08:46
Site 008	raccoon	2018-11-06 04:46:14	2018-11-06	04:46:14	4:46:14
Site 008	raccoon	2018-11-09 03:52:23	2018-11-09	03:52:23	3:52:23
Site 008	raccoon	2018-11-14 03:19:58	2018-11-14	03:19:58	3:19:58
Site 008	raccoon	2018-11-18 01:41:11	2018-11-18	01:41:11	1:41:11
Site 008	raccoon	2018-11-19 06:37:29	2018-11-19	06:37:29	6:37:29
Site 008	raccoon	2018-11-19 23:04:03	2018-11-19	23:04:03	23:04:03
Site 008	raccoon	2018-11-20 04:56:16	2018-11-20	04:56:16	4:56:16
Site 008	raccoon	2018-11-22 22:55:36	2018-11-22	22:55:36	22:55:36
Site 008	raccoon	2018-11-26 06:34:43	2018-11-26	06:34:43	6:34:43
Site 008	raccoon	2018-11-28 02:05:31	2018-11-28	02:05:31	2:05:31
Site 008	raccoon	2018-11-28 03:29:58	2018-11-28	03:29:58	3:29:58
Site 008	raccoon	2018-11-29 23:39:43	2018-11-29	23:39:43	23:39:43
Site 008	raccoon	2018-12-02 03:07:56	2018-12-02	03:07:56	3:07:56
Site 008	raccoon	2018-12-02 21:18:18	2018-12-02	21:18:18	21:18:18
Site 008	raccoon	2018-12-03 03:21:53	2018-12-03	03:21:53	3:21:53
Site 008	raccoon	2018-12-06 04:02:33	2018-12-06	04:02:33	4:02:33
Site 008	raccoon	2018-12-06 23:38:11	2018-12-06	23:38:11	23:38:11
Site 008	raccoon	2018-12-12 01:27:12	2018-12-12	01:27:12	1:27:12
Site 008	raccoon	2018-12-18 22:20:31	2018-12-18	22:20:31	22:20:31
Site 008	raccoon	2018-12-22 03:21:31	2018-12-22	03:21:31	3:21:31
Site 008	raccoon	2018-12-23 05:27:31	2018-12-23	05:27:31	5:27:31
Site 008	raccoon	2018-12-27 05:18:13	2018-12-27	05:18:13	5:18:13
Site 008	raccoon	2018-12-30 00:40:18	2018-12-30	00:40:18	0:40:18
Site 008	raccoon	2018-12-30 03:40:20	2018-12-30	03:40:20	3:40:20
Site 008	raccoon	2018-12-31 02:33:43	2018-12-31	02:33:43	2:33:43
Site 008	raccoon	2019-01-03 05:04:57	2019-01-03	05:04:57	5:04:57
Site 008	raccoon	2019-01-04 23:07:39	2019-01-04	23:07:39	23:07:39
Site 008	raccoon	2019-01-07 04:45:04	2019-01-07	04:45:04	4:45:04
Site 008	raccoon	2019-01-10 21:29:28	2019-01-10	21:29:28	21:29:28
Site 008	raccoon	2019-01-21 02:43:49	2019-01-21	02:43:49	2:43:49
Site 008	raccoon	2019-01-23 20:19:16	2019-01-23	20:19:16	20:19:16
Site 008	raccoon	2019-01-25 22:18:14	2019-01-25	22:18:14	22:18:14
Site 008	raccoon	2019-01-26 01:15:43	2019-01-26	01:15:43	1:15:43
Site 008	raccoon	2019-01-26 03:39:21	2019-01-26	03:39:21	3:39:21
Site 009	bobcat	2018-10-11 03:32:45	2018-10-11	03:32:45	3:32:45
Site 009	grey fox	2018-04-21 07:00:22	2018-04-21	07:00:22	7:00:22
Site 009	grey fox	2018-05-07 04:31:56	2018-05-07	04:31:56	4:31:56
Site 009	grey fox	2018-05-25 17:54:13	2018-05-25	17:54:13	17:54:13
Site 009	grey fox	2018-06-27 04:53:45	2018-06-27	04:53:45	4:53:45
Site 009	grey fox	2018-10-29 18:39:02	2018-10-29	18:39:02	18:39:02
Site 009	grey fox	2018-11-01 19:52:38	2018-11-01	19:52:38	19:52:38
Site 009	grey fox	2018-11-05 22:09:48	2018-11-05	22:09:48	22:09:48
Site 009	grey fox	2018-11-10 07:09:51	2018-11-10	07:09:51	7:09:51
Site 009	grey fox	2018-11-10 18:12:21	2018-11-10	18:12:21	18:12:21
Site 009	grey fox	2018-11-18 19:29:05	2018-11-18	19:29:05	19:29:05
Site 009	grey fox	2018-11-22 04:15:26	2018-11-22	04:15:26	4:15:26
Site 009	grey fox	2018-11-22 06:15:38	2018-11-22	06:15:38	6:15:38
Site 009	grey fox	2018-11-25 07:13:29	2018-11-25	07:13:29	7:13:29
Site 009	grey fox	2018-11-27 00:58:01	2018-11-27	00:58:01	0:58:01
Site 009	grey fox	2018-11-27 04:04:55	2018-11-27	04:04:55	4:04:55
Site 009	grey fox	2018-11-30 22:07:02	2018-11-30	22:07:02	22:07:02
Site 009	grey fox	2018-12-06 18:20:09	2018-12-06	18:20:09	18:20:09
Site 009	grey fox	2018-12-12 01:54:34	2018-12-12	01:54:34	1:54:34
Site 009	grey fox	2018-12-12 23:25:46	2018-12-12	23:25:46	23:25:46
Site 009	grey fox	2018-12-13 04:18:49	2018-12-13	04:18:49	4:18:49
Site 009	grey fox	2018-12-14 07:22:47	2018-12-14	07:22:47	7:22:47
Site 009	grey fox	2018-12-15 04:20:22	2018-12-15	04:20:22	4:20:22
Site 009	grey fox	2018-12-17 05:42:36	2018-12-17	05:42:36	5:42:36
Site 009	grey fox	2018-12-19 07:59:26	2018-12-19	07:59:26	7:59:26
Site 009	grey fox	2018-12-21 00:25:50	2018-12-21	00:25:50	0:25:50
Site 009	grey fox	2018-12-24 07:41:47	2018-12-24	07:41:47	7:41:47
Site 009	grey fox	2018-12-26 03:31:19	2018-12-26	03:31:19	3:31:19
Site 009	grey fox	2018-12-29 07:49:28	2018-12-29	07:49:28	7:49:28
Site 009	grey fox	2019-01-09 07:12:40	2019-01-09	07:12:40	7:12:40
Site 009	grey fox	2019-01-15 06:40:59	2019-01-15	06:40:59	6:40:59
Site 009	grey fox	2019-01-18 07:30:55	2019-01-18	07:30:55	7:30:55
Site 009	grey fox	2019-01-21 02:42:31	2019-01-21	02:42:31	2:42:31
Site 009	grey fox	2019-01-21 03:46:51	2019-01-21	03:46:51	3:46:51
Site 009	grey fox	2019-01-22 08:07:01	2019-01-22	08:07:01	8:07:01
Site 009	grey fox	2019-01-23 00:25:32	2019-01-23	00:25:32	0:25:32
Site 009	grey fox	2019-01-24 01:25:42	2019-01-24	01:25:42	1:25:42
Site 009	grey fox	2019-01-25 18:24:25	2019-01-25	18:24:25	18:24:25
Site 009	opossum	2018-09-09 22:39:02	2018-09-09	22:39:02	22:39:02
Site 009	opossum	2018-09-11 03:08:18	2018-09-11	03:08:18	3:08:18
Site 009	opossum	2018-09-12 22:21:50	2018-09-12	22:21:50	22:21:50
Site 009	opossum	2018-09-15 21:23:41	2018-09-15	21:23:41	21:23:41
Site 009	opossum	2018-09-18 23:10:11	2018-09-18	23:10:11	23:10:11
Site 009	opossum	2018-09-21 02:45:57	2018-09-21	02:45:57	2:45:57
Site 009	opossum	2018-09-28 23:32:59	2018-09-28	23:32:59	23:32:59
Site 009	opossum	2018-09-29 00:36:49	2018-09-29	00:36:49	0:36:49
Site 009	opossum	2018-10-06 20:25:41	2018-10-06	20:25:41	20:25:41
Site 009	opossum	2018-10-08 05:00:42	2018-10-08	05:00:42	5:00:42
Site 009	opossum	2018-10-13 00:02:50	2018-10-13	00:02:50	0:02:50
Site 009	opossum	2018-10-29 23:59:47	2018-10-29	23:59:47	23:59:47
Site 009	opossum	2018-11-04 01:02:34	2018-11-04	01:02:34	1:02:34
Site 009	opossum	2018-11-15 01:58:52	2018-11-15	01:58:52	1:58:52
Site 009	opossum	2018-11-15 06:09:54	2018-11-15	06:09:54	6:09:54
Site 009	opossum	2018-11-16 02:28:07	2018-11-16	02:28:07	2:28:07
Site 009	opossum	2018-12-10 00:31:51	2018-12-10	00:31:51	0:31:51
Site 009	opossum	2019-01-11 21:29:19	2019-01-11	21:29:19	21:29:19
Site 009	opossum	2019-01-16 19:02:17	2019-01-16	19:02:17	19:02:17
Site 009	raccoon	2018-04-24 22:27:17	2018-04-24	22:27:17	22:27:17
Site 009	raccoon	2018-04-29 02:56:16	2018-04-29	02:56:16	2:56:16
Site 009	raccoon	2018-05-02 23:55:22	2018-05-02	23:55:22	23:55:22
Site 009	raccoon	2018-05-05 04:22:36	2018-05-05	04:22:36	4:22:36
Site 009	raccoon	2018-05-24 22:03:35	2018-05-24	22:03:35	22:03:35
Site 009	raccoon	2018-05-25 00:14:44	2018-05-25	00:14:44	0:14:44
Site 009	raccoon	2018-07-23 04:26:53	2018-07-23	04:26:53	4:26:53
Site 009	raccoon	2018-09-09 23:02:23	2018-09-09	23:02:23	23:02:23
Site 009	raccoon	2018-09-19 01:36:47	2018-09-19	01:36:47	1:36:47
Site 009	raccoon	2018-10-25 23:32:14	2018-10-25	23:32:14	23:32:14
Site 009	raccoon	2018-10-29 02:19:29	2018-10-29	02:19:29	2:19:29
Site 009	raccoon	2018-11-05 05:12:08	2018-11-05	05:12:08	5:12:08
Site 009	raccoon	2018-11-14 04:41:47	2018-11-14	04:41:47	4:41:47
Site 009	raccoon	2018-11-15 05:57:21	2018-11-15	05:57:21	5:57:21
Site 009	raccoon	2018-11-16 23:31:48	2018-11-16	23:31:48	23:31:48
Site 009	raccoon	2018-11-17 00:05:34	2018-11-17	00:05:34	0:05:34
Site 009	raccoon	2018-11-17 03:52:07	2018-11-17	03:52:07	3:52:07
Site 009	raccoon	2018-11-24 03:29:02	2018-11-24	03:29:02	3:29:02
Site 009	raccoon	2018-11-24 07:42:06	2018-11-24	07:42:06	7:42:06
Site 009	raccoon	2018-12-12 00:51:11	2018-12-12	00:51:11	0:51:11
Site 009	raccoon	2018-12-12 02:09:10	2018-12-12	02:09:10	2:09:10
Site 009	raccoon	2018-12-12 03:12:23	2018-12-12	03:12:23	3:12:23
Site 009	raccoon	2019-01-03 21:07:06	2019-01-03	21:07:06	21:07:06
Site 010	bobcat	2018-05-19 22:59:09	2018-05-19	22:59:09	22:59:09
Site 010	bobcat	2018-06-25 02:15:39	2018-06-25	02:15:39	2:15:39
Site 010	bobcat	2018-10-06 02:10:56	2018-10-06	02:10:56	2:10:56
Site 010	bobcat	2018-11-23 07:42:23	2018-11-23	07:42:23	7:42:23
Site 010	bobcat	2018-11-25 19:42:35	2018-11-25	19:42:35	19:42:35
Site 010	bobcat	2018-11-27 02:48:22	2018-11-27	02:48:22	2:48:22
Site 010	bobcat	2018-12-30 06:59:24	2018-12-30	06:59:24	6:59:24
Site 010	bobcat	2019-01-06 06:41:51	2019-01-06	06:41:51	6:41:51
Site 010	bobcat	2019-01-18 03:47:46	2019-01-18	03:47:46	3:47:46
Site 010	coyote	2018-05-04 09:05:13	2018-05-04	09:05:13	9:05:13
Site 010	coyote	2018-05-17 17:28:32	2018-05-17	17:28:32	17:28:32
Site 010	coyote	2018-09-18 08:14:15	2018-09-18	08:14:15	8:14:15
Site 010	coyote	2018-09-18 23:04:50	2018-09-18	23:04:50	23:04:50
Site 010	coyote	2018-09-22 21:01:45	2018-09-22	21:01:45	21:01:45
Site 010	coyote	2018-09-23 02:15:02	2018-09-23	02:15:02	2:15:02
Site 010	coyote	2018-09-23 02:55:21	2018-09-23	02:55:21	2:55:21
Site 010	coyote	2018-09-27 02:25:22	2018-09-27	02:25:22	2:25:22
Site 010	coyote	2018-09-27 04:35:05	2018-09-27	04:35:05	4:35:05
Site 010	coyote	2018-10-20 14:39:19	2018-10-20	14:39:19	14:39:19
Site 010	coyote	2018-10-22 09:27:04	2018-10-22	09:27:04	9:27:04
Site 010	coyote	2018-10-25 03:54:42	2018-10-25	03:54:42	3:54:42
Site 010	opossum	2018-05-16 22:17:09	2018-05-16	22:17:09	22:17:09
Site 010	opossum	2018-07-08 23:48:08	2018-07-08	23:48:08	23:48:08
Site 010	opossum	2018-09-16 20:19:14	2018-09-16	20:19:14	20:19:14
Site 010	opossum	2018-09-18 01:30:05	2018-09-18	01:30:05	1:30:05
Site 010	opossum	2018-12-20 02:33:29	2018-12-20	02:33:29	2:33:29
Site 010	striped skunk	2018-10-27 23:37:45	2018-10-27	23:37:45	23:37:45
Site 011	bobcat	2018-11-17 18:31:29	2018-11-17	18:31:29	18:31:29
Site 011	coyote	2018-05-31 02:55:17	2018-05-31	02:55:17	2:55:17
Site 011	coyote	2018-07-11 06:07:23	2018-07-11	06:07:23	6:07:23
Site 011	coyote	2018-07-16 06:46:28	2018-07-16	06:46:28	6:46:28
Site 011	coyote	2018-07-17 05:05:10	2018-07-17	05:05:10	5:05:10
Site 011	coyote	2018-07-20 00:59:13	2018-07-20	00:59:13	0:59:13
Site 011	coyote	2018-07-23 05:10:07	2018-07-23	05:10:07	5:10:07
Site 011	coyote	2018-08-02 03:36:08	2018-08-02	03:36:08	3:36:08
Site 011	coyote	2018-10-07 07:41:15	2018-10-07	07:41:15	7:41:15
Site 011	coyote	2018-10-17 11:58:12	2018-10-17	11:58:12	11:58:12
Site 011	coyote	2018-10-17 21:40:07	2018-10-17	21:40:07	21:40:07
Site 011	coyote	2018-10-17 23:06:12	2018-10-17	23:06:12	23:06:12
Site 011	coyote	2018-10-30 01:13:34	2018-10-30	01:13:34	1:13:34
Site 011	opossum	2018-05-31 23:40:34	2018-05-31	23:40:34	23:40:34
Site 011	opossum	2018-06-21 02:43:48	2018-06-21	02:43:48	2:43:48
Site 011	opossum	2018-06-28 01:56:52	2018-06-28	01:56:52	1:56:52
Site 011	opossum	2018-06-29 01:56:42	2018-06-29	01:56:42	1:56:42
Site 011	opossum	2018-06-30 00:43:54	2018-06-30	00:43:54	0:43:54
Site 011	opossum	2018-07-01 03:31:55	2018-07-01	03:31:55	3:31:55
Site 011	opossum	2018-07-02 00:31:14	2018-07-02	00:31:14	0:31:14
Site 011	opossum	2018-07-02 01:32:37	2018-07-02	01:32:37	1:32:37
Site 011	opossum	2018-07-05 03:39:03	2018-07-05	03:39:03	3:39:03
Site 011	opossum	2018-07-08 03:29:56	2018-07-08	03:29:56	3:29:56
Site 011	opossum	2018-07-09 04:22:35	2018-07-09	04:22:35	4:22:35
Site 011	opossum	2018-07-10 03:31:05	2018-07-10	03:31:05	3:31:05
Site 011	opossum	2018-07-12 04:23:01	2018-07-12	04:23:01	4:23:01
Site 011	opossum	2018-07-18 03:01:42	2018-07-18	03:01:42	3:01:42
Site 011	opossum	2018-07-20 23:55:21	2018-07-20	23:55:21	23:55:21
Site 011	opossum	2018-07-25 01:19:22	2018-07-25	01:19:22	1:19:22
Site 011	opossum	2018-07-25 02:40:08	2018-07-25	02:40:08	2:40:08
Site 011	opossum	2018-07-25 05:08:39	2018-07-25	05:08:39	5:08:39
Site 011	opossum	2018-07-26 02:07:37	2018-07-26	02:07:37	2:07:37
Site 011	opossum	2018-07-26 22:55:12	2018-07-26	22:55:12	22:55:12
Site 011	opossum	2018-07-27 02:33:22	2018-07-27	02:33:22	2:33:22
Site 011	opossum	2018-07-28 01:38:43	2018-07-28	01:38:43	1:38:43
Site 011	opossum	2018-07-28 04:36:57	2018-07-28	04:36:57	4:36:57
Site 011	opossum	2018-07-29 01:52:08	2018-07-29	01:52:08	1:52:08
Site 011	opossum	2018-07-31 03:56:52	2018-07-31	03:56:52	3:56:52
Site 011	opossum	2018-08-03 23:00:10	2018-08-03	23:00:10	23:00:10
Site 011	opossum	2018-08-03 23:31:17	2018-08-03	23:31:17	23:31:17
Site 011	opossum	2018-08-07 23:18:24	2018-08-07	23:18:24	23:18:24
Site 011	opossum	2018-08-09 21:59:04	2018-08-09	21:59:04	21:59:04
Site 011	opossum	2018-08-15 01:19:37	2018-08-15	01:19:37	1:19:37
Site 011	opossum	2018-08-22 20:58:49	2018-08-22	20:58:49	20:58:49
Site 011	opossum	2018-08-23 04:45:18	2018-08-23	04:45:18	4:45:18
Site 011	opossum	2018-08-23 20:22:56	2018-08-23	20:22:56	20:22:56
Site 011	opossum	2018-08-26 03:45:52	2018-08-26	03:45:52	3:45:52
Site 011	opossum	2018-08-26 20:31:42	2018-08-26	20:31:42	20:31:42
Site 011	opossum	2018-08-28 03:04:06	2018-08-28	03:04:06	3:04:06
Site 011	opossum	2018-08-30 02:08:49	2018-08-30	02:08:49	2:08:49
Site 011	opossum	2018-09-01 21:17:39	2018-09-01	21:17:39	21:17:39
Site 011	opossum	2018-09-02 04:52:27	2018-09-02	04:52:27	4:52:27
Site 011	opossum	2018-09-02 21:53:28	2018-09-02	21:53:28	21:53:28
Site 011	opossum	2018-09-03 20:35:46	2018-09-03	20:35:46	20:35:46
Site 011	opossum	2018-09-04 03:45:59	2018-09-04	03:45:59	3:45:59
Site 011	opossum	2018-09-04 04:31:13	2018-09-04	04:31:13	4:31:13
Site 011	opossum	2018-09-04 21:49:58	2018-09-04	21:49:58	21:49:58
Site 011	opossum	2018-09-05 00:48:37	2018-09-05	00:48:37	0:48:37
Site 011	opossum	2018-09-07 19:46:21	2018-09-07	19:46:21	19:46:21
Site 011	opossum	2018-09-08 01:34:13	2018-09-08	01:34:13	1:34:13
Site 011	opossum	2018-09-10 19:40:12	2018-09-10	19:40:12	19:40:12
Site 011	opossum	2018-09-11 03:17:44	2018-09-11	03:17:44	3:17:44
Site 011	opossum	2018-09-13 05:51:53	2018-09-13	05:51:53	5:51:53
Site 011	opossum	2018-09-13 20:15:53	2018-09-13	20:15:53	20:15:53
Site 011	opossum	2018-09-13 20:57:29	2018-09-13	20:57:29	20:57:29
Site 011	opossum	2018-09-14 04:04:36	2018-09-14	04:04:36	4:04:36
Site 011	opossum	2018-09-14 05:22:42	2018-09-14	05:22:42	5:22:42
Site 011	opossum	2018-09-14 21:50:13	2018-09-14	21:50:13	21:50:13
Site 011	opossum	2018-09-14 23:30:09	2018-09-14	23:30:09	23:30:09
Site 011	opossum	2018-09-15 00:28:36	2018-09-15	00:28:36	0:28:36
Site 011	opossum	2018-09-15 20:34:14	2018-09-15	20:34:14	20:34:14
Site 011	opossum	2018-09-18 20:06:25	2018-09-18	20:06:25	20:06:25
Site 011	opossum	2018-09-19 19:40:43	2018-09-19	19:40:43	19:40:43
Site 011	opossum	2018-09-19 22:12:36	2018-09-19	22:12:36	22:12:36
Site 011	opossum	2018-09-20 03:18:11	2018-09-20	03:18:11	3:18:11
Site 011	opossum	2018-09-20 05:31:14	2018-09-20	05:31:14	5:31:14
Site 011	opossum	2018-09-23 21:40:51	2018-09-23	21:40:51	21:40:51
Site 011	opossum	2018-09-24 02:05:46	2018-09-24	02:05:46	2:05:46
Site 011	opossum	2018-09-25 20:53:37	2018-09-25	20:53:37	20:53:37
Site 011	opossum	2018-09-26 05:17:31	2018-09-26	05:17:31	5:17:31
Site 011	opossum	2018-09-29 03:59:47	2018-09-29	03:59:47	3:59:47
Site 011	opossum	2018-09-29 04:43:00	2018-09-29	04:43:00	4:43:00
Site 011	opossum	2018-10-01 05:53:55	2018-10-01	05:53:55	5:53:55
Site 011	opossum	2018-10-02 04:11:45	2018-10-02	04:11:45	4:11:45
Site 011	opossum	2018-10-04 21:25:22	2018-10-04	21:25:22	21:25:22
Site 011	opossum	2018-10-05 22:35:13	2018-10-05	22:35:13	22:35:13
Site 011	opossum	2018-10-06 20:43:09	2018-10-06	20:43:09	20:43:09
Site 011	opossum	2018-10-06 21:50:15	2018-10-06	21:50:15	21:50:15
Site 011	opossum	2018-10-07 03:14:24	2018-10-07	03:14:24	3:14:24
Site 011	opossum	2018-10-09 02:49:48	2018-10-09	02:49:48	2:49:48
Site 011	opossum	2018-10-09 04:04:26	2018-10-09	04:04:26	4:04:26
Site 011	opossum	2018-10-10 04:01:36	2018-10-10	04:01:36	4:01:36
Site 011	opossum	2018-10-11 03:56:45	2018-10-11	03:56:45	3:56:45
Site 011	opossum	2018-10-12 00:52:52	2018-10-12	00:52:52	0:52:52
Site 011	opossum	2018-10-16 21:33:29	2018-10-16	21:33:29	21:33:29
Site 011	opossum	2018-10-21 22:06:05	2018-10-21	22:06:05	22:06:05
Site 011	opossum	2018-10-25 00:00:43	2018-10-25	00:00:43	0:00:43
Site 011	opossum	2018-10-26 04:49:32	2018-10-26	04:49:32	4:49:32
Site 011	opossum	2018-11-03 21:10:52	2018-11-03	21:10:52	21:10:52
Site 011	opossum	2018-11-06 04:36:05	2018-11-06	04:36:05	4:36:05
Site 011	opossum	2018-11-10 20:51:26	2018-11-10	20:51:26	20:51:26
Site 011	opossum	2018-11-13 23:32:05	2018-11-13	23:32:05	23:32:05
Site 011	opossum	2018-11-17 21:29:10	2018-11-17	21:29:10	21:29:10
Site 011	opossum	2018-11-19 23:37:17	2018-11-19	23:37:17	23:37:17
Site 011	opossum	2018-12-10 22:00:49	2018-12-10	22:00:49	22:00:49
Site 011	opossum	2018-12-12 00:57:10	2018-12-12	00:57:10	0:57:10
Site 011	opossum	2018-12-20 03:23:05	2018-12-20	03:23:05	3:23:05
Site 011	opossum	2018-12-24 02:30:03	2018-12-24	02:30:03	2:30:03
Site 011	opossum	2018-12-30 20:41:55	2018-12-30	20:41:55	20:41:55
Site 011	opossum	2019-01-17 20:17:58	2019-01-17	20:17:58	20:17:58
Site 011	opossum	2019-01-19 21:13:42	2019-01-19	21:13:42	21:13:42
Site 011	opossum	2019-01-25 01:33:05	2019-01-25	01:33:05	1:33:05
Site 011	raccoon	2018-05-20 21:04:40	2018-05-20	21:04:40	21:04:40
Site 011	raccoon	2018-05-20 21:56:54	2018-05-20	21:56:54	21:56:54
Site 011	raccoon	2018-05-21 12:13:44	2018-05-21	12:13:44	12:13:44
Site 011	raccoon	2018-05-22 21:50:11	2018-05-22	21:50:11	21:50:11
Site 011	raccoon	2018-05-24 02:29:28	2018-05-24	02:29:28	2:29:28
Site 011	raccoon	2018-05-24 22:08:31	2018-05-24	22:08:31	22:08:31
Site 011	raccoon	2018-05-26 00:45:27	2018-05-26	00:45:27	0:45:27
Site 011	raccoon	2018-05-26 05:37:37	2018-05-26	05:37:37	5:37:37
Site 011	raccoon	2018-05-26 06:30:53	2018-05-26	06:30:53	6:30:53
Site 011	raccoon	2018-05-26 23:39:44	2018-05-26	23:39:44	23:39:44
Site 011	raccoon	2018-05-27 22:51:26	2018-05-27	22:51:26	22:51:26
Site 011	raccoon	2018-05-28 21:49:07	2018-05-28	21:49:07	21:49:07
Site 011	raccoon	2018-05-29 00:18:21	2018-05-29	00:18:21	0:18:21
Site 011	raccoon	2018-05-31 06:30:40	2018-05-31	06:30:40	6:30:40
Site 011	raccoon	2018-06-01 05:16:58	2018-06-01	05:16:58	5:16:58
Site 011	raccoon	2018-06-07 21:41:13	2018-06-07	21:41:13	21:41:13
Site 011	raccoon	2018-06-09 12:19:51	2018-06-09	12:19:51	12:19:51
Site 011	raccoon	2018-06-12 04:01:51	2018-06-12	04:01:51	4:01:51
Site 011	raccoon	2018-06-13 21:57:53	2018-06-13	21:57:53	21:57:53
Site 011	raccoon	2018-06-15 16:45:29	2018-06-15	16:45:29	16:45:29
Site 011	raccoon	2018-06-15 21:37:51	2018-06-15	21:37:51	21:37:51
Site 011	raccoon	2018-06-16 02:20:52	2018-06-16	02:20:52	2:20:52
Site 011	raccoon	2018-06-19 00:26:23	2018-06-19	00:26:23	0:26:23
Site 011	raccoon	2018-06-21 21:29:56	2018-06-21	21:29:56	21:29:56
Site 011	raccoon	2018-06-23 22:02:05	2018-06-23	22:02:05	22:02:05
Site 011	raccoon	2018-06-30 04:47:33	2018-06-30	04:47:33	4:47:33
Site 011	raccoon	2018-06-30 22:28:09	2018-06-30	22:28:09	22:28:09
Site 011	raccoon	2018-07-05 03:31:19	2018-07-05	03:31:19	3:31:19
Site 011	raccoon	2018-07-06 05:26:15	2018-07-06	05:26:15	5:26:15
Site 011	raccoon	2018-07-09 13:18:01	2018-07-09	13:18:01	13:18:01
Site 011	raccoon	2018-07-09 21:20:41	2018-07-09	21:20:41	21:20:41
Site 011	raccoon	2018-07-12 23:54:00	2018-07-12	23:54:00	23:54:00
Site 011	raccoon	2018-07-15 02:44:57	2018-07-15	02:44:57	2:44:57
Site 011	raccoon	2018-07-17 00:15:51	2018-07-17	00:15:51	0:15:51
Site 011	raccoon	2018-07-18 03:11:38	2018-07-18	03:11:38	3:11:38
Site 011	raccoon	2018-07-18 04:37:27	2018-07-18	04:37:27	4:37:27
Site 011	raccoon	2018-07-18 23:56:05	2018-07-18	23:56:05	23:56:05
Site 011	raccoon	2018-07-20 03:53:07	2018-07-20	03:53:07	3:53:07
Site 011	raccoon	2018-07-22 01:42:21	2018-07-22	01:42:21	1:42:21
Site 011	raccoon	2018-07-22 03:40:33	2018-07-22	03:40:33	3:40:33
Site 011	raccoon	2018-07-22 04:13:02	2018-07-22	04:13:02	4:13:02
Site 011	raccoon	2018-07-24 03:22:47	2018-07-24	03:22:47	3:22:47
Site 011	raccoon	2018-07-25 04:28:42	2018-07-25	04:28:42	4:28:42
Site 011	raccoon	2018-07-27 01:07:47	2018-07-27	01:07:47	1:07:47
Site 011	raccoon	2018-07-28 22:11:26	2018-07-28	22:11:26	22:11:26
Site 011	raccoon	2018-07-30 04:09:11	2018-07-30	04:09:11	4:09:11
Site 011	raccoon	2018-08-04 22:39:38	2018-08-04	22:39:38	22:39:38
Site 011	raccoon	2018-08-06 01:39:34	2018-08-06	01:39:34	1:39:34
Site 011	raccoon	2018-08-06 04:42:35	2018-08-06	04:42:35	4:42:35
Site 011	raccoon	2018-08-07 00:35:33	2018-08-07	00:35:33	0:35:33
Site 011	raccoon	2018-08-10 02:41:21	2018-08-10	02:41:21	2:41:21
Site 011	raccoon	2018-08-15 04:05:42	2018-08-15	04:05:42	4:05:42
Site 011	raccoon	2018-08-16 06:24:45	2018-08-16	06:24:45	6:24:45
Site 011	raccoon	2018-08-16 20:37:13	2018-08-16	20:37:13	20:37:13
Site 011	raccoon	2018-08-18 03:44:56	2018-08-18	03:44:56	3:44:56
Site 011	raccoon	2018-08-18 04:15:11	2018-08-18	04:15:11	4:15:11
Site 011	raccoon	2018-08-18 05:28:12	2018-08-18	05:28:12	5:28:12
Site 011	raccoon	2018-08-18 20:55:44	2018-08-18	20:55:44	20:55:44
Site 011	raccoon	2018-08-18 22:27:21	2018-08-18	22:27:21	22:27:21
Site 011	raccoon	2018-08-18 23:04:01	2018-08-18	23:04:01	23:04:01
Site 011	raccoon	2018-08-24 00:35:49	2018-08-24	00:35:49	0:35:49
Site 011	raccoon	2018-08-25 09:08:28	2018-08-25	09:08:28	9:08:28
Site 011	raccoon	2018-08-27 01:09:04	2018-08-27	01:09:04	1:09:04
Site 011	raccoon	2018-08-28 00:18:12	2018-08-28	00:18:12	0:18:12
Site 011	raccoon	2018-08-28 21:34:34	2018-08-28	21:34:34	21:34:34
Site 011	raccoon	2018-08-29 00:58:21	2018-08-29	00:58:21	0:58:21
Site 011	raccoon	2018-08-29 19:40:20	2018-08-29	19:40:20	19:40:20
Site 011	raccoon	2018-08-29 20:28:39	2018-08-29	20:28:39	20:28:39
Site 011	raccoon	2018-08-30 04:16:30	2018-08-30	04:16:30	4:16:30
Site 011	raccoon	2018-08-30 21:59:27	2018-08-30	21:59:27	21:59:27
Site 011	raccoon	2018-08-31 02:22:21	2018-08-31	02:22:21	2:22:21
Site 011	raccoon	2018-09-01 07:47:25	2018-09-01	07:47:25	7:47:25
Site 011	raccoon	2018-09-06 21:50:56	2018-09-06	21:50:56	21:50:56
Site 011	raccoon	2018-09-06 23:41:21	2018-09-06	23:41:21	23:41:21
Site 011	raccoon	2018-09-09 02:11:08	2018-09-09	02:11:08	2:11:08
Site 011	raccoon	2018-09-09 04:03:43	2018-09-09	04:03:43	4:03:43
Site 011	raccoon	2018-09-09 22:30:50	2018-09-09	22:30:50	22:30:50
Site 011	raccoon	2018-09-10 04:48:11	2018-09-10	04:48:11	4:48:11
Site 011	raccoon	2018-09-10 23:28:23	2018-09-10	23:28:23	23:28:23
Site 011	raccoon	2018-09-11 03:34:52	2018-09-11	03:34:52	3:34:52
Site 011	raccoon	2018-09-11 05:00:55	2018-09-11	05:00:55	5:00:55
Site 011	raccoon	2018-09-13 04:57:44	2018-09-13	04:57:44	4:57:44
Site 011	raccoon	2018-09-13 22:27:36	2018-09-13	22:27:36	22:27:36
Site 011	raccoon	2018-09-15 20:55:07	2018-09-15	20:55:07	20:55:07
Site 011	raccoon	2018-09-15 22:13:26	2018-09-15	22:13:26	22:13:26
Site 011	raccoon	2018-09-15 23:18:13	2018-09-15	23:18:13	23:18:13
Site 011	raccoon	2018-09-16 03:08:00	2018-09-16	03:08:00	3:08:00
Site 011	raccoon	2018-09-16 19:45:08	2018-09-16	19:45:08	19:45:08
Site 011	raccoon	2018-09-17 04:44:59	2018-09-17	04:44:59	4:44:59
Site 011	raccoon	2018-09-17 20:14:34	2018-09-17	20:14:34	20:14:34
Site 011	raccoon	2018-09-20 22:34:44	2018-09-20	22:34:44	22:34:44
Site 011	raccoon	2018-09-22 02:23:35	2018-09-22	02:23:35	2:23:35
Site 011	raccoon	2018-09-23 00:45:50	2018-09-23	00:45:50	0:45:50
Site 011	raccoon	2018-09-24 04:57:14	2018-09-24	04:57:14	4:57:14
Site 011	raccoon	2018-09-24 09:41:38	2018-09-24	09:41:38	9:41:38
Site 011	raccoon	2018-09-24 20:27:53	2018-09-24	20:27:53	20:27:53
Site 011	raccoon	2018-09-24 22:26:09	2018-09-24	22:26:09	22:26:09
Site 011	raccoon	2018-09-24 23:06:38	2018-09-24	23:06:38	23:06:38
Site 011	raccoon	2018-09-25 16:44:05	2018-09-25	16:44:05	16:44:05
Site 011	raccoon	2018-09-26 21:46:49	2018-09-26	21:46:49	21:46:49
Site 011	raccoon	2018-09-29 19:31:11	2018-09-29	19:31:11	19:31:11
Site 011	raccoon	2018-09-30 05:56:35	2018-09-30	05:56:35	5:56:35
Site 011	raccoon	2018-09-30 22:12:33	2018-09-30	22:12:33	22:12:33
Site 011	raccoon	2018-10-01 21:19:05	2018-10-01	21:19:05	21:19:05
Site 011	raccoon	2018-10-02 22:06:13	2018-10-02	22:06:13	22:06:13
Site 011	raccoon	2018-10-03 19:40:47	2018-10-03	19:40:47	19:40:47
Site 011	raccoon	2018-10-04 21:46:07	2018-10-04	21:46:07	21:46:07
Site 011	raccoon	2018-10-05 05:46:12	2018-10-05	05:46:12	5:46:12
Site 011	raccoon	2018-10-05 19:57:08	2018-10-05	19:57:08	19:57:08
Site 011	raccoon	2018-10-05 20:44:46	2018-10-05	20:44:46	20:44:46
Site 011	raccoon	2018-10-06 20:40:41	2018-10-06	20:40:41	20:40:41
Site 011	raccoon	2018-10-07 05:27:24	2018-10-07	05:27:24	5:27:24
Site 011	raccoon	2018-10-07 06:16:42	2018-10-07	06:16:42	6:16:42
Site 011	raccoon	2018-10-10 21:00:07	2018-10-10	21:00:07	21:00:07
Site 011	raccoon	2018-10-11 19:25:24	2018-10-11	19:25:24	19:25:24
Site 011	raccoon	2018-10-11 20:32:10	2018-10-11	20:32:10	20:32:10
Site 011	raccoon	2018-10-12 02:45:42	2018-10-12	02:45:42	2:45:42
Site 011	raccoon	2018-10-13 22:53:23	2018-10-13	22:53:23	22:53:23
Site 011	raccoon	2018-10-14 03:18:37	2018-10-14	03:18:37	3:18:37
Site 011	raccoon	2018-10-14 21:16:51	2018-10-14	21:16:51	21:16:51
Site 011	raccoon	2018-10-14 22:21:48	2018-10-14	22:21:48	22:21:48
Site 011	raccoon	2018-10-15 01:06:24	2018-10-15	01:06:24	1:06:24
Site 011	raccoon	2018-10-15 06:12:35	2018-10-15	06:12:35	6:12:35
Site 011	raccoon	2018-10-17 23:41:25	2018-10-17	23:41:25	23:41:25
Site 011	raccoon	2018-10-18 00:00:03	2018-10-18	00:00:03	0:00:03
Site 011	raccoon	2018-10-18 03:19:06	2018-10-18	03:19:06	3:19:06
Site 011	raccoon	2018-10-18 19:19:44	2018-10-18	19:19:44	19:19:44
Site 011	raccoon	2018-10-19 05:40:23	2018-10-19	05:40:23	5:40:23
Site 011	raccoon	2018-10-23 20:33:26	2018-10-23	20:33:26	20:33:26
Site 011	raccoon	2018-10-24 02:21:11	2018-10-24	02:21:11	2:21:11
Site 011	raccoon	2018-10-24 04:58:40	2018-10-24	04:58:40	4:58:40
Site 011	raccoon	2018-10-26 19:07:21	2018-10-26	19:07:21	19:07:21
Site 011	raccoon	2018-10-28 21:52:45	2018-10-28	21:52:45	21:52:45
Site 011	raccoon	2018-10-30 00:57:16	2018-10-30	00:57:16	0:57:16
Site 011	raccoon	2018-10-31 20:18:07	2018-10-31	20:18:07	20:18:07
Site 011	raccoon	2018-10-31 21:46:12	2018-10-31	21:46:12	21:46:12
Site 011	raccoon	2018-11-04 21:25:36	2018-11-04	21:25:36	21:25:36
Site 011	raccoon	2018-11-04 23:26:29	2018-11-04	23:26:29	23:26:29
Site 011	raccoon	2018-11-07 22:52:32	2018-11-07	22:52:32	22:52:32
Site 011	raccoon	2018-11-08 19:16:45	2018-11-08	19:16:45	19:16:45
Site 011	raccoon	2018-11-08 20:36:03	2018-11-08	20:36:03	20:36:03
Site 011	raccoon	2018-11-08 21:21:57	2018-11-08	21:21:57	21:21:57
Site 011	raccoon	2018-11-09 02:10:51	2018-11-09	02:10:51	2:10:51
Site 011	raccoon	2018-11-13 20:26:53	2018-11-13	20:26:53	20:26:53
Site 011	raccoon	2018-11-13 22:16:50	2018-11-13	22:16:50	22:16:50
Site 011	raccoon	2018-11-16 23:38:19	2018-11-16	23:38:19	23:38:19
Site 011	raccoon	2018-11-21 02:59:01	2018-11-21	02:59:01	2:59:01
Site 011	raccoon	2018-12-01 19:39:44	2018-12-01	19:39:44	19:39:44
Site 011	raccoon	2018-12-02 18:51:06	2018-12-02	18:51:06	18:51:06
Site 011	raccoon	2018-12-07 00:19:30	2018-12-07	00:19:30	0:19:30
Site 011	raccoon	2018-12-13 01:59:47	2018-12-13	01:59:47	1:59:47
Site 011	raccoon	2018-12-13 04:30:12	2018-12-13	04:30:12	4:30:12
Site 011	raccoon	2018-12-14 00:02:29	2018-12-14	00:02:29	0:02:29
Site 011	raccoon	2018-12-14 18:51:27	2018-12-14	18:51:27	18:51:27
Site 011	raccoon	2018-12-14 19:59:06	2018-12-14	19:59:06	19:59:06
Site 011	raccoon	2018-12-27 01:09:09	2018-12-27	01:09:09	1:09:09
Site 011	raccoon	2018-12-28 02:15:43	2018-12-28	02:15:43	2:15:43
Site 011	raccoon	2018-12-28 19:03:42	2018-12-28	19:03:42	19:03:42
Site 011	raccoon	2018-12-31 01:01:21	2018-12-31	01:01:21	1:01:21
Site 011	raccoon	2018-12-31 18:43:45	2018-12-31	18:43:45	18:43:45
Site 011	raccoon	2019-01-01 20:28:15	2019-01-01	20:28:15	20:28:15
Site 011	raccoon	2019-01-09 00:03:04	2019-01-09	00:03:04	0:03:04
Site 011	raccoon	2019-01-13 17:57:10	2019-01-13	17:57:10	17:57:10
Site 011	raccoon	2019-01-14 19:24:41	2019-01-14	19:24:41	19:24:41
Site 011	raccoon	2019-01-15 23:34:25	2019-01-15	23:34:25	23:34:25
Site 011	raccoon	2019-01-16 18:06:44	2019-01-16	18:06:44	18:06:44
Site 011	raccoon	2019-01-20 00:41:29	2019-01-20	00:41:29	0:41:29
Site 011	raccoon	2019-01-21 22:28:49	2019-01-21	22:28:49	22:28:49
Site 011	raccoon	2019-01-24 03:50:24	2019-01-24	03:50:24	3:50:24
Site 011	raccoon	2019-01-25 18:34:20	2019-01-25	18:34:20	18:34:20
Site 012	opossum	2018-10-17 23:10:25	2018-10-17	23:10:25	23:10:25
Site 012	opossum	2018-10-28 03:54:34	2018-10-28	03:54:34	3:54:34
Site 012	opossum	2018-10-29 06:08:22	2018-10-29	06:08:22	6:08:22
Site 012	opossum	2018-10-31 00:28:45	2018-10-31	00:28:45	0:28:45
Site 012	opossum	2018-11-01 22:02:50	2018-11-01	22:02:50	22:02:50
Site 012	opossum	2018-12-20 04:08:50	2018-12-20	04:08:50	4:08:50
Site 012	opossum	2019-01-18 04:50:19	2019-01-18	04:50:19	4:50:19
Site 012	opossum	2019-01-21 21:33:44	2019-01-21	21:33:44	21:33:44
Site 012	raccoon	2018-04-24 23:30:46	2018-04-24	23:30:46	23:30:46
Site 012	raccoon	2018-04-28 01:17:00	2018-04-28	01:17:00	1:17:00
Site 012	raccoon	2018-05-05 23:16:09	2018-05-05	23:16:09	23:16:09
Site 012	raccoon	2018-05-15 00:47:33	2018-05-15	00:47:33	0:47:33
Site 012	raccoon	2018-06-01 01:30:45	2018-06-01	01:30:45	1:30:45
Site 012	raccoon	2018-06-02 04:54:50	2018-06-02	04:54:50	4:54:50
Site 012	raccoon	2018-06-03 23:07:23	2018-06-03	23:07:23	23:07:23
Site 012	raccoon	2018-06-06 03:48:43	2018-06-06	03:48:43	3:48:43
Site 012	raccoon	2018-06-07 04:24:12	2018-06-07	04:24:12	4:24:12
Site 012	raccoon	2018-06-19 00:13:19	2018-06-19	00:13:19	0:13:19
Site 012	raccoon	2018-06-25 22:41:42	2018-06-25	22:41:42	22:41:42
Site 012	raccoon	2018-06-30 04:40:04	2018-06-30	04:40:04	4:40:04
Site 012	raccoon	2018-07-29 03:13:15	2018-07-29	03:13:15	3:13:15
Site 012	raccoon	2018-08-07 04:02:10	2018-08-07	04:02:10	4:02:10
Site 012	raccoon	2018-09-01 01:07:50	2018-09-01	01:07:50	1:07:50
Site 012	raccoon	2018-09-04 03:58:08	2018-09-04	03:58:08	3:58:08
Site 012	raccoon	2018-09-22 01:43:03	2018-09-22	01:43:03	1:43:03
Site 012	raccoon	2018-10-14 19:56:53	2018-10-14	19:56:53	19:56:53
Site 012	raccoon	2018-10-16 19:44:55	2018-10-16	19:44:55	19:44:55
Site 012	raccoon	2018-10-17 20:48:54	2018-10-17	20:48:54	20:48:54
Site 012	raccoon	2018-10-18 23:08:34	2018-10-18	23:08:34	23:08:34
Site 012	raccoon	2018-10-22 05:51:46	2018-10-22	05:51:46	5:51:46
Site 012	raccoon	2018-10-23 03:58:16	2018-10-23	03:58:16	3:58:16
Site 012	raccoon	2018-10-23 04:33:54	2018-10-23	04:33:54	4:33:54
Site 012	raccoon	2018-10-27 06:10:07	2018-10-27	06:10:07	6:10:07
Site 012	raccoon	2018-10-28 05:45:29	2018-10-28	05:45:29	5:45:29
Site 012	raccoon	2018-11-03 01:53:40	2018-11-03	01:53:40	1:53:40
Site 012	raccoon	2018-11-03 02:57:17	2018-11-03	02:57:17	2:57:17
Site 012	raccoon	2018-11-03 18:44:36	2018-11-03	18:44:36	18:44:36
Site 012	raccoon	2018-11-05 23:58:45	2018-11-05	23:58:45	23:58:45
Site 012	raccoon	2018-11-06 06:31:21	2018-11-06	06:31:21	6:31:21
Site 012	raccoon	2018-11-07 00:56:24	2018-11-07	00:56:24	0:56:24
Site 012	raccoon	2018-11-12 00:42:56	2018-11-12	00:42:56	0:42:56
Site 012	raccoon	2018-12-08 06:09:08	2018-12-08	06:09:08	6:09:08
Site 012	raccoon	2019-01-02 21:05:11	2019-01-02	21:05:11	21:05:11
Site 012	raccoon	2019-01-03 23:01:14	2019-01-03	23:01:14	23:01:14
Site 012	raccoon	2019-01-04 01:37:53	2019-01-04	01:37:53	1:37:53
Site 012	raccoon	2019-01-11 07:32:52	2019-01-11	07:32:52	7:32:52
Site 013	opossum	2018-05-04 04:19:42	2018-05-04	04:19:42	4:19:42
Site 013	opossum	2018-05-05 00:17:54	2018-05-05	00:17:54	0:17:54
Site 013	opossum	2018-05-22 01:56:31	2018-05-22	01:56:31	1:56:31
Site 013	opossum	2018-08-03 23:56:09	2018-08-03	23:56:09	23:56:09
Site 013	opossum	2018-08-20 23:25:09	2018-08-20	23:25:09	23:25:09
Site 013	opossum	2018-08-24 02:12:09	2018-08-24	02:12:09	2:12:09
Site 013	opossum	2018-09-07 01:31:47	2018-09-07	01:31:47	1:31:47
Site 013	opossum	2018-09-13 02:48:33	2018-09-13	02:48:33	2:48:33
Site 013	opossum	2018-09-14 23:47:47	2018-09-14	23:47:47	23:47:47
Site 013	opossum	2018-09-16 00:03:28	2018-09-16	00:03:28	0:03:28
Site 013	opossum	2018-09-18 00:42:53	2018-09-18	00:42:53	0:42:53
Site 013	opossum	2018-09-27 05:05:05	2018-09-27	05:05:05	5:05:05
Site 013	opossum	2018-10-29 00:39:52	2018-10-29	00:39:52	0:39:52
Site 013	opossum	2018-11-17 23:21:45	2018-11-17	23:21:45	23:21:45
Site 013	raccoon	2018-05-03 04:28:00	2018-05-03	04:28:00	4:28:00
Site 013	raccoon	2018-07-31 00:51:51	2018-07-31	00:51:51	0:51:51
Site 013	raccoon	2018-08-09 02:39:58	2018-08-09	02:39:58	2:39:58
Site 013	raccoon	2018-08-17 00:44:06	2018-08-17	00:44:06	0:44:06
Site 013	raccoon	2018-08-26 21:11:11	2018-08-26	21:11:11	21:11:11
Site 013	raccoon	2018-11-08 00:36:20	2018-11-08	00:36:20	0:36:20
Site 013	raccoon	2018-11-08 03:09:39	2018-11-08	03:09:39	3:09:39
Site 013	raccoon	2018-11-08 12:03:49	2018-11-08	12:03:49	12:03:49
Site 013	raccoon	2018-11-16 05:04:23	2018-11-16	05:04:23	5:04:23
Site 013	raccoon	2018-11-16 07:24:43	2018-11-16	07:24:43	7:24:43
Site 013	raccoon	2018-11-19 03:11:20	2018-11-19	03:11:20	3:11:20
Site 013	striped skunk	2018-09-03 00:42:47	2018-09-03	00:42:47	0:42:47
Site 014	bobcat	2018-10-12 02:14:17	2018-10-12	02:14:17	2:14:17
Site 014	bobcat	2018-12-22 06:08:13	2018-12-22	06:08:13	6:08:13
Site 014	opossum	2018-05-01 03:48:52	2018-05-01	03:48:52	3:48:52
Site 014	opossum	2018-05-15 01:12:00	2018-05-15	01:12:00	1:12:00
Site 014	opossum	2018-05-19 01:06:03	2018-05-19	01:06:03	1:06:03
Site 014	opossum	2018-05-19 01:47:58	2018-05-19	01:47:58	1:47:58
Site 014	opossum	2018-05-21 22:54:28	2018-05-21	22:54:28	22:54:28
Site 014	opossum	2018-05-23 01:24:08	2018-05-23	01:24:08	1:24:08
Site 014	opossum	2018-06-05 02:33:05	2018-06-05	02:33:05	2:33:05
Site 014	opossum	2018-06-09 00:15:56	2018-06-09	00:15:56	0:15:56
Site 014	opossum	2018-06-12 04:16:32	2018-06-12	04:16:32	4:16:32
Site 014	opossum	2018-06-22 00:08:34	2018-06-22	00:08:34	0:08:34
Site 014	opossum	2018-07-04 23:25:14	2018-07-04	23:25:14	23:25:14
Site 014	opossum	2018-07-07 00:25:07	2018-07-07	00:25:07	0:25:07
Site 014	opossum	2018-10-01 02:18:02	2018-10-01	02:18:02	2:18:02
Site 014	opossum	2018-10-06 01:02:43	2018-10-06	01:02:43	1:02:43
Site 014	opossum	2018-10-07 03:58:01	2018-10-07	03:58:01	3:58:01
Site 014	opossum	2018-10-09 02:04:23	2018-10-09	02:04:23	2:04:23
Site 014	opossum	2018-11-01 00:21:55	2018-11-01	00:21:55	0:21:55
Site 014	opossum	2018-11-02 01:46:09	2018-11-02	01:46:09	1:46:09
Site 014	opossum	2018-12-12 04:39:38	2018-12-12	04:39:38	4:39:38
Site 014	opossum	2018-12-14 22:41:47	2018-12-14	22:41:47	22:41:47
Site 014	opossum	2018-12-17 02:06:52	2018-12-17	02:06:52	2:06:52
Site 014	opossum	2019-01-08 21:16:21	2019-01-08	21:16:21	21:16:21
Site 014	opossum	2019-01-20 05:53:01	2019-01-20	05:53:01	5:53:01
Site 014	raccoon	2018-07-25 03:01:46	2018-07-25	03:01:46	3:01:46
Site 014	raccoon	2018-10-27 05:02:43	2018-10-27	05:02:43	5:02:43
Site 014	raccoon	2018-12-29 03:43:40	2018-12-29	03:43:40	3:43:40
Site 015	grey fox	2018-04-25 01:33:26	2018-04-25	01:33:26	1:33:26
Site 015	grey fox	2018-05-06 23:49:03	2018-05-06	23:49:03	23:49:03
Site 015	grey fox	2018-05-20 22:20:34	2018-05-20	22:20:34	22:20:34
Site 015	grey fox	2018-05-24 23:00:58	2018-05-24	23:00:58	23:00:58
Site 015	grey fox	2018-06-10 22:37:58	2018-06-10	22:37:58	22:37:58
Site 015	grey fox	2018-06-11 22:14:30	2018-06-11	22:14:30	22:14:30
Site 015	grey fox	2018-06-14 19:12:06	2018-06-14	19:12:06	19:12:06
Site 015	grey fox	2018-06-18 06:34:34	2018-06-18	06:34:34	6:34:34
Site 015	grey fox	2018-06-18 21:51:10	2018-06-18	21:51:10	21:51:10
Site 015	grey fox	2018-06-19 08:15:48	2018-06-19	08:15:48	8:15:48
Site 015	grey fox	2018-06-19 21:26:25	2018-06-19	21:26:25	21:26:25
Site 015	grey fox	2018-06-21 00:21:50	2018-06-21	00:21:50	0:21:50
Site 015	grey fox	2018-06-21 19:43:08	2018-06-21	19:43:08	19:43:08
Site 015	grey fox	2018-06-24 01:20:40	2018-06-24	01:20:40	1:20:40
Site 015	grey fox	2018-06-24 23:05:50	2018-06-24	23:05:50	23:05:50
Site 015	grey fox	2018-06-28 21:36:35	2018-06-28	21:36:35	21:36:35
Site 015	grey fox	2018-06-29 22:28:10	2018-06-29	22:28:10	22:28:10
Site 015	grey fox	2018-06-29 23:20:49	2018-06-29	23:20:49	23:20:49
Site 015	grey fox	2018-06-30 03:45:42	2018-06-30	03:45:42	3:45:42
Site 015	grey fox	2018-07-02 23:07:14	2018-07-02	23:07:14	23:07:14
Site 015	grey fox	2018-07-04 23:49:36	2018-07-04	23:49:36	23:49:36
Site 015	grey fox	2018-07-06 00:30:22	2018-07-06	00:30:22	0:30:22
Site 015	grey fox	2018-07-10 02:53:02	2018-07-10	02:53:02	2:53:02
Site 015	grey fox	2018-07-10 22:43:00	2018-07-10	22:43:00	22:43:00
Site 015	grey fox	2018-07-13 01:42:49	2018-07-13	01:42:49	1:42:49
Site 015	grey fox	2018-07-18 03:21:33	2018-07-18	03:21:33	3:21:33
Site 015	grey fox	2018-07-19 05:29:03	2018-07-19	05:29:03	5:29:03
Site 015	grey fox	2018-07-24 22:39:39	2018-07-24	22:39:39	22:39:39
Site 015	grey fox	2018-07-27 22:32:53	2018-07-27	22:32:53	22:32:53
Site 015	grey fox	2018-07-29 04:37:13	2018-07-29	04:37:13	4:37:13
Site 015	grey fox	2018-08-02 00:49:06	2018-08-02	00:49:06	0:49:06
Site 015	grey fox	2018-08-02 21:23:27	2018-08-02	21:23:27	21:23:27
Site 015	grey fox	2018-08-03 00:01:48	2018-08-03	00:01:48	0:01:48
Site 015	grey fox	2018-08-06 04:23:01	2018-08-06	04:23:01	4:23:01
Site 015	grey fox	2018-08-07 03:47:31	2018-08-07	03:47:31	3:47:31
Site 015	grey fox	2018-08-07 04:37:50	2018-08-07	04:37:50	4:37:50
Site 015	grey fox	2018-08-09 23:52:38	2018-08-09	23:52:38	23:52:38
Site 015	grey fox	2018-08-10 00:18:10	2018-08-10	00:18:10	0:18:10
Site 015	grey fox	2018-08-10 22:22:15	2018-08-10	22:22:15	22:22:15
Site 015	grey fox	2018-08-11 02:50:40	2018-08-11	02:50:40	2:50:40
Site 015	grey fox	2018-08-11 04:20:57	2018-08-11	04:20:57	4:20:57
Site 015	grey fox	2018-08-13 00:24:55	2018-08-13	00:24:55	0:24:55
Site 015	grey fox	2018-08-13 02:07:18	2018-08-13	02:07:18	2:07:18
Site 015	grey fox	2018-08-13 05:05:40	2018-08-13	05:05:40	5:05:40
Site 015	grey fox	2018-08-13 23:27:52	2018-08-13	23:27:52	23:27:52
Site 015	grey fox	2018-08-14 20:54:41	2018-08-14	20:54:41	20:54:41
Site 015	grey fox	2018-08-14 22:21:28	2018-08-14	22:21:28	22:21:28
Site 015	grey fox	2018-08-16 22:14:02	2018-08-16	22:14:02	22:14:02
Site 015	grey fox	2018-08-30 00:33:02	2018-08-30	00:33:02	0:33:02
Site 015	grey fox	2018-09-02 21:53:59	2018-09-02	21:53:59	21:53:59
Site 015	grey fox	2018-09-09 00:15:43	2018-09-09	00:15:43	0:15:43
Site 015	grey fox	2018-09-25 23:05:26	2018-09-25	23:05:26	23:05:26
Site 015	grey fox	2018-10-06 22:46:55	2018-10-06	22:46:55	22:46:55
Site 015	grey fox	2018-10-08 23:48:28	2018-10-08	23:48:28	23:48:28
Site 015	grey fox	2018-10-12 00:30:56	2018-10-12	00:30:56	0:30:56
Site 015	grey fox	2018-10-21 01:34:00	2018-10-21	01:34:00	1:34:00
Site 015	grey fox	2018-11-01 03:41:29	2018-11-01	03:41:29	3:41:29
Site 015	grey fox	2018-11-01 06:55:05	2018-11-01	06:55:05	6:55:05
Site 015	grey fox	2018-11-07 00:34:48	2018-11-07	00:34:48	0:34:48
Site 015	grey fox	2018-11-08 21:43:41	2018-11-08	21:43:41	21:43:41
Site 015	grey fox	2018-11-09 21:26:05	2018-11-09	21:26:05	21:26:05
Site 015	grey fox	2018-11-24 22:47:29	2018-11-24	22:47:29	22:47:29
Site 015	grey fox	2018-11-27 21:11:55	2018-11-27	21:11:55	21:11:55
Site 015	grey fox	2018-12-01 21:04:12	2018-12-01	21:04:12	21:04:12
Site 015	grey fox	2018-12-13 23:57:50	2018-12-13	23:57:50	23:57:50
Site 015	grey fox	2018-12-27 00:51:35	2018-12-27	00:51:35	0:51:35
Site 015	grey fox	2018-12-27 20:56:20	2018-12-27	20:56:20	20:56:20
Site 015	grey fox	2019-01-12 21:43:05	2019-01-12	21:43:05	21:43:05
Site 015	grey fox	2019-01-23 20:24:37	2019-01-23	20:24:37	20:24:37
Site 015	grey fox	2019-01-24 03:55:16	2019-01-24	03:55:16	3:55:16
Site 015	opossum	2018-04-23 03:05:52	2018-04-23	03:05:52	3:05:52
Site 015	opossum	2018-05-03 01:50:00	2018-05-03	01:50:00	1:50:00
Site 015	opossum	2018-05-03 21:53:15	2018-05-03	21:53:15	21:53:15
Site 015	opossum	2018-05-05 23:19:44	2018-05-05	23:19:44	23:19:44
Site 015	opossum	2018-05-07 22:28:42	2018-05-07	22:28:42	22:28:42
Site 015	opossum	2018-05-08 01:54:24	2018-05-08	01:54:24	1:54:24
Site 015	opossum	2018-05-09 00:14:10	2018-05-09	00:14:10	0:14:10
Site 015	opossum	2018-05-15 04:47:44	2018-05-15	04:47:44	4:47:44
Site 015	opossum	2018-05-18 22:29:38	2018-05-18	22:29:38	22:29:38
Site 015	opossum	2018-05-24 00:02:23	2018-05-24	00:02:23	0:02:23
Site 015	opossum	2018-06-04 22:56:24	2018-06-04	22:56:24	22:56:24
Site 015	opossum	2018-06-06 22:19:13	2018-06-06	22:19:13	22:19:13
Site 015	opossum	2018-06-09 01:30:08	2018-06-09	01:30:08	1:30:08
Site 015	opossum	2018-06-11 01:38:47	2018-06-11	01:38:47	1:38:47
Site 015	opossum	2018-06-17 22:41:22	2018-06-17	22:41:22	22:41:22
Site 015	opossum	2018-06-22 03:34:19	2018-06-22	03:34:19	3:34:19
Site 015	opossum	2018-07-04 00:20:39	2018-07-04	00:20:39	0:20:39
Site 015	opossum	2018-07-05 02:45:08	2018-07-05	02:45:08	2:45:08
Site 015	opossum	2018-07-05 03:58:25	2018-07-05	03:58:25	3:58:25
Site 015	opossum	2018-07-06 23:15:12	2018-07-06	23:15:12	23:15:12
Site 015	opossum	2018-07-08 04:22:21	2018-07-08	04:22:21	4:22:21
Site 015	opossum	2018-07-09 23:03:13	2018-07-09	23:03:13	23:03:13
Site 015	opossum	2018-07-17 02:18:35	2018-07-17	02:18:35	2:18:35
Site 015	opossum	2018-07-18 04:34:58	2018-07-18	04:34:58	4:34:58
Site 015	opossum	2018-07-20 03:27:38	2018-07-20	03:27:38	3:27:38
Site 015	opossum	2018-07-30 01:49:08	2018-07-30	01:49:08	1:49:08
Site 015	opossum	2018-08-02 01:24:23	2018-08-02	01:24:23	1:24:23
Site 015	opossum	2018-08-07 04:40:42	2018-08-07	04:40:42	4:40:42
Site 015	opossum	2018-08-09 03:13:41	2018-08-09	03:13:41	3:13:41
Site 015	opossum	2018-08-12 22:26:41	2018-08-12	22:26:41	22:26:41
Site 015	opossum	2018-08-13 22:19:54	2018-08-13	22:19:54	22:19:54
Site 015	opossum	2018-08-15 23:08:27	2018-08-15	23:08:27	23:08:27
Site 015	opossum	2018-08-19 02:50:27	2018-08-19	02:50:27	2:50:27
Site 015	opossum	2018-08-20 01:43:11	2018-08-20	01:43:11	1:43:11
Site 015	opossum	2018-08-24 05:16:51	2018-08-24	05:16:51	5:16:51
Site 015	opossum	2018-08-25 21:42:38	2018-08-25	21:42:38	21:42:38
Site 015	opossum	2018-08-26 02:31:06	2018-08-26	02:31:06	2:31:06
Site 015	opossum	2018-08-27 21:37:06	2018-08-27	21:37:06	21:37:06
Site 015	opossum	2018-08-30 23:20:25	2018-08-30	23:20:25	23:20:25
Site 015	opossum	2018-09-01 03:24:29	2018-09-01	03:24:29	3:24:29
Site 015	opossum	2018-09-02 00:32:27	2018-09-02	00:32:27	0:32:27
Site 015	opossum	2018-09-04 22:02:53	2018-09-04	22:02:53	22:02:53
Site 015	opossum	2018-09-28 20:59:47	2018-09-28	20:59:47	20:59:47
Site 015	opossum	2018-09-29 19:55:15	2018-09-29	19:55:15	19:55:15
Site 015	opossum	2018-09-30 05:03:31	2018-09-30	05:03:31	5:03:31
Site 015	opossum	2018-10-03 21:04:23	2018-10-03	21:04:23	21:04:23
Site 015	opossum	2018-10-04 20:43:03	2018-10-04	20:43:03	20:43:03
Site 015	opossum	2018-10-07 21:46:48	2018-10-07	21:46:48	21:46:48
Site 015	opossum	2018-10-13 00:53:26	2018-10-13	00:53:26	0:53:26
Site 015	opossum	2018-10-17 01:39:29	2018-10-17	01:39:29	1:39:29
Site 015	opossum	2018-10-17 20:26:26	2018-10-17	20:26:26	20:26:26
Site 015	opossum	2018-10-17 22:09:57	2018-10-17	22:09:57	22:09:57
Site 015	opossum	2018-10-18 21:12:58	2018-10-18	21:12:58	21:12:58
Site 015	opossum	2018-10-20 01:12:49	2018-10-20	01:12:49	1:12:49
Site 015	opossum	2018-10-26 19:20:13	2018-10-26	19:20:13	19:20:13
Site 015	opossum	2018-10-28 05:02:43	2018-10-28	05:02:43	5:02:43
Site 015	opossum	2018-10-29 19:08:06	2018-10-29	19:08:06	19:08:06
Site 015	opossum	2018-10-31 00:24:55	2018-10-31	00:24:55	0:24:55
Site 015	opossum	2018-10-31 01:00:30	2018-10-31	01:00:30	1:00:30
Site 015	opossum	2018-10-31 05:06:34	2018-10-31	05:06:34	5:06:34
Site 015	opossum	2018-11-04 03:10:33	2018-11-04	03:10:33	3:10:33
Site 015	opossum	2018-11-07 02:34:45	2018-11-07	02:34:45	2:34:45
Site 015	opossum	2018-11-08 01:57:35	2018-11-08	01:57:35	1:57:35
Site 015	opossum	2018-11-08 21:53:08	2018-11-08	21:53:08	21:53:08
Site 015	opossum	2018-11-09 19:37:36	2018-11-09	19:37:36	19:37:36
Site 015	opossum	2018-11-09 20:36:47	2018-11-09	20:36:47	20:36:47
Site 015	opossum	2018-11-09 21:18:16	2018-11-09	21:18:16	21:18:16
Site 015	opossum	2018-11-10 19:24:19	2018-11-10	19:24:19	19:24:19
Site 015	opossum	2018-11-10 22:20:31	2018-11-10	22:20:31	22:20:31
Site 015	opossum	2018-11-10 23:55:31	2018-11-10	23:55:31	23:55:31
Site 015	opossum	2018-11-11 01:35:10	2018-11-11	01:35:10	1:35:10
Site 015	opossum	2018-11-11 20:58:19	2018-11-11	20:58:19	20:58:19
Site 015	opossum	2018-11-12 19:12:56	2018-11-12	19:12:56	19:12:56
Site 015	opossum	2018-11-14 21:45:35	2018-11-14	21:45:35	21:45:35
Site 015	opossum	2018-11-16 04:41:53	2018-11-16	04:41:53	4:41:53
Site 015	opossum	2018-11-16 05:45:14	2018-11-16	05:45:14	5:45:14
Site 015	opossum	2018-11-16 21:37:45	2018-11-16	21:37:45	21:37:45
Site 015	opossum	2018-11-18 02:58:07	2018-11-18	02:58:07	2:58:07
Site 015	opossum	2018-11-18 23:16:21	2018-11-18	23:16:21	23:16:21
Site 015	opossum	2018-11-21 01:47:57	2018-11-21	01:47:57	1:47:57
Site 015	opossum	2018-11-21 03:04:07	2018-11-21	03:04:07	3:04:07
Site 015	opossum	2018-11-21 04:06:24	2018-11-21	04:06:24	4:06:24
Site 015	opossum	2018-11-21 18:39:29	2018-11-21	18:39:29	18:39:29
Site 015	opossum	2018-11-22 20:18:38	2018-11-22	20:18:38	20:18:38
Site 015	opossum	2018-11-23 03:30:42	2018-11-23	03:30:42	3:30:42
Site 015	opossum	2018-11-24 20:19:06	2018-11-24	20:19:06	20:19:06
Site 015	opossum	2018-11-25 04:51:50	2018-11-25	04:51:50	4:51:50
Site 015	opossum	2018-11-25 20:37:25	2018-11-25	20:37:25	20:37:25
Site 015	opossum	2018-11-27 22:37:46	2018-11-27	22:37:46	22:37:46
Site 015	opossum	2018-11-28 02:55:11	2018-11-28	02:55:11	2:55:11
Site 015	opossum	2018-11-28 21:21:39	2018-11-28	21:21:39	21:21:39
Site 015	opossum	2018-11-29 00:16:26	2018-11-29	00:16:26	0:16:26
Site 015	opossum	2018-11-29 19:13:28	2018-11-29	19:13:28	19:13:28
Site 015	opossum	2018-11-29 20:24:24	2018-11-29	20:24:24	20:24:24
Site 015	opossum	2018-11-30 02:22:22	2018-11-30	02:22:22	2:22:22
Site 015	opossum	2018-11-30 19:27:48	2018-11-30	19:27:48	19:27:48
Site 015	opossum	2018-12-01 00:20:33	2018-12-01	00:20:33	0:20:33
Site 015	opossum	2018-12-01 04:35:26	2018-12-01	04:35:26	4:35:26
Site 015	opossum	2018-12-03 00:36:53	2018-12-03	00:36:53	0:36:53
Site 015	opossum	2018-12-03 01:20:32	2018-12-03	01:20:32	1:20:32
Site 015	opossum	2018-12-06 23:03:51	2018-12-06	23:03:51	23:03:51
Site 015	opossum	2018-12-07 18:13:56	2018-12-07	18:13:56	18:13:56
Site 015	opossum	2018-12-08 00:17:32	2018-12-08	00:17:32	0:17:32
Site 015	opossum	2018-12-08 00:57:09	2018-12-08	00:57:09	0:57:09
Site 015	opossum	2018-12-08 02:57:26	2018-12-08	02:57:26	2:57:26
Site 015	opossum	2018-12-09 20:34:39	2018-12-09	20:34:39	20:34:39
Site 015	opossum	2018-12-09 22:01:19	2018-12-09	22:01:19	22:01:19
Site 015	opossum	2018-12-10 00:36:38	2018-12-10	00:36:38	0:36:38
Site 015	opossum	2018-12-11 02:19:14	2018-12-11	02:19:14	2:19:14
Site 015	opossum	2018-12-11 03:41:18	2018-12-11	03:41:18	3:41:18
Site 015	opossum	2018-12-11 07:14:10	2018-12-11	07:14:10	7:14:10
Site 015	opossum	2018-12-12 23:28:55	2018-12-12	23:28:55	23:28:55
Site 015	opossum	2018-12-13 01:44:26	2018-12-13	01:44:26	1:44:26
Site 015	opossum	2018-12-14 22:12:03	2018-12-14	22:12:03	22:12:03
Site 015	opossum	2018-12-16 21:05:01	2018-12-16	21:05:01	21:05:01
[truncated: 5,170 more rows]

## Sheet: target species only
Station	Species	DateTimeOriginal	Date	Time	Hour
Site 002	bobcat	2018-05-17 04:26:26	2018-05-17	04:26:26	4:26:26
Site 002	bobcat	2018-05-23 18:59:45	2018-05-23	18:59:45	18:59:45
Site 002	bobcat	2018-05-31 16:44:27	2018-05-31	16:44:27	16:44:27
Site 002	bobcat	2018-06-07 03:50:48	2018-06-07	03:50:48	3:50:48
Site 002	bobcat	2018-06-15 09:13:27	2018-06-15	09:13:27	9:13:27
Site 002	coyote	2018-05-16 00:22:37	2018-05-16	00:22:37	0:22:37
Site 002	coyote	2018-05-28 04:52:44	2018-05-28	04:52:44	4:52:44
Site 002	coyote	2018-06-02 07:30:51	2018-06-02	07:30:51	7:30:51
Site 002	coyote	2018-06-06 04:31:35	2018-06-06	04:31:35	4:31:35
Site 002	coyote	2018-06-27 04:16:07	2018-06-27	04:16:07	4:16:07
Site 002	coyote	2018-07-20 14:36:26	2018-07-20	14:36:26	14:36:26
Site 002	coyote	2018-07-20 14:36:27	2018-07-20	14:36:27	14:36:27
Site 002	coyote	2018-07-20 14:36:28	2018-07-20	14:36:28	14:36:28
Site 002	coyote	2018-07-20 14:36:29	2018-07-20	14:36:29	14:36:29
Site 002	coyote	2018-07-20 14:36:34	2018-07-20	14:36:34	14:36:34
Site 002	coyote	2018-07-25 00:45:04	2018-07-25	00:45:04	0:45:04
Site 002	coyote	2018-07-29 01:19:36	2018-07-29	01:19:36	1:19:36
Site 002	coyote	2018-07-29 01:19:38	2018-07-29	01:19:38	1:19:38
Site 002	coyote	2018-07-30 00:17:21	2018-07-30	00:17:21	0:17:21
Site 002	coyote	2018-08-10 18:58:23	2018-08-10	18:58:23	18:58:23
Site 002	coyote	2018-08-11 03:51:27	2018-08-11	03:51:27	3:51:27
Site 002	coyote	2018-08-11 06:07:47	2018-08-11	06:07:47	6:07:47
Site 002	coyote	2018-08-13 07:21:39	2018-08-13	07:21:39	7:21:39
Site 002	coyote	2018-08-16 03:18:48	2018-08-16	03:18:48	3:18:48
Site 002	coyote	2018-08-16 22:17:16	2018-08-16	22:17:16	22:17:16
Site 002	coyote	2018-08-16 23:55:43	2018-08-16	23:55:43	23:55:43
Site 002	coyote	2018-08-19 05:14:32	2018-08-19	05:14:32	5:14:32
Site 002	coyote	2018-08-23 01:22:18	2018-08-23	01:22:18	1:22:18
Site 002	coyote	2018-08-23 05:43:12	2018-08-23	05:43:12	5:43:12
Site 002	coyote	2018-08-23 07:41:39	2018-08-23	07:41:39	7:41:39
Site 002	coyote	2018-08-25 04:39:19	2018-08-25	04:39:19	4:39:19
Site 002	coyote	2018-08-25 05:52:16	2018-08-25	05:52:16	5:52:16
Site 002	coyote	2018-08-26 03:06:15	2018-08-26	03:06:15	3:06:15
Site 002	grey fox	2018-06-09 22:13:17	2018-06-09	22:13:17	22:13:17
Site 002	grey fox	2018-06-14 23:17:02	2018-06-14	23:17:02	23:17:02
Site 002	grey fox	2018-06-15 01:14:40	2018-06-15	01:14:40	1:14:40
Site 002	grey fox	2018-06-16 22:11:44	2018-06-16	22:11:44	22:11:44
Site 002	grey fox	2018-06-19 23:22:08	2018-06-19	23:22:08	23:22:08
Site 002	grey fox	2018-06-23 02:09:33	2018-06-23	02:09:33	2:09:33
Site 002	grey fox	2018-07-08 02:14:05	2018-07-08	02:14:05	2:14:05
Site 002	grey fox	2018-07-13 20:44:01	2018-07-13	20:44:01	20:44:01
Site 002	grey fox	2018-07-26 22:51:53	2018-07-26	22:51:53	22:51:53
Site 002	grey fox	2018-08-19 01:30:18	2018-08-19	01:30:18	1:30:18
Site 002	grey fox	2018-08-23 23:07:13	2018-08-23	23:07:13	23:07:13
Site 002	grey fox	2018-08-23 23:07:15	2018-08-23	23:07:15	23:07:15
Site 002	grey fox	2018-08-25 22:48:29	2018-08-25	22:48:29	22:48:29
Site 002	grey fox	2018-08-25 22:48:32	2018-08-25	22:48:32	22:48:32
Site 002	grey fox	2018-08-25 22:48:42	2018-08-25	22:48:42	22:48:42
Site 002	opossum	2018-04-18 21:38:11	2018-04-18	21:38:11	21:38:11
Site 002	opossum	2018-04-19 02:20:06	2018-04-19	02:20:06	2:20:06
Site 002	opossum	2018-04-19 02:20:21	2018-04-19	02:20:21	2:20:21
Site 002	opossum	2018-04-19 03:28:50	2018-04-19	03:28:50	3:28:50
Site 002	opossum	2018-04-19 03:29:03	2018-04-19	03:29:03	3:29:03
Site 002	opossum	2018-04-19 20:52:02	2018-04-19	20:52:02	20:52:02
Site 002	opossum	2018-04-19 20:52:22	2018-04-19	20:52:22	20:52:22
Site 002	opossum	2018-04-21 02:46:25	2018-04-21	02:46:25	2:46:25
Site 002	opossum	2018-04-22 00:10:31	2018-04-22	00:10:31	0:10:31
Site 002	opossum	2018-04-22 22:21:20	2018-04-22	22:21:20	22:21:20
Site 002	opossum	2018-04-24 00:12:02	2018-04-24	00:12:02	0:12:02
Site 002	opossum	2018-04-24 22:53:22	2018-04-24	22:53:22	22:53:22
Site 002	opossum	2018-04-24 23:07:28	2018-04-24	23:07:28	23:07:28
Site 002	opossum	2018-04-24 23:11:09	2018-04-24	23:11:09	23:11:09
Site 002	opossum	2018-04-24 23:46:48	2018-04-24	23:46:48	23:46:48
Site 002	opossum	2018-04-26 01:03:42	2018-04-26	01:03:42	1:03:42
Site 002	opossum	2018-04-26 19:32:37	2018-04-26	19:32:37	19:32:37
Site 002	opossum	2018-04-26 22:28:26	2018-04-26	22:28:26	22:28:26
Site 002	opossum	2018-04-27 20:38:48	2018-04-27	20:38:48	20:38:48
Site 002	opossum	2018-04-27 21:54:46	2018-04-27	21:54:46	21:54:46
Site 002	opossum	2018-04-29 22:59:59	2018-04-29	22:59:59	22:59:59
Site 002	opossum	2018-04-30 04:20:00	2018-04-30	04:20:00	4:20:00
Site 002	opossum	2018-04-30 22:24:48	2018-04-30	22:24:48	22:24:48
Site 002	opossum	2018-05-01 00:51:47	2018-05-01	00:51:47	0:51:47
Site 002	opossum	2018-05-04 21:27:33	2018-05-04	21:27:33	21:27:33
Site 002	opossum	2018-05-10 21:00:11	2018-05-10	21:00:11	21:00:11
Site 002	opossum	2018-05-14 23:35:21	2018-05-14	23:35:21	23:35:21
Site 002	opossum	2018-05-15 22:59:31	2018-05-15	22:59:31	22:59:31
Site 002	opossum	2018-05-16 23:08:19	2018-05-16	23:08:19	23:08:19
Site 002	opossum	2018-05-20 02:14:32	2018-05-20	02:14:32	2:14:32
Site 002	opossum	2018-05-21 00:20:18	2018-05-21	00:20:18	0:20:18
Site 002	opossum	2018-05-22 02:02:22	2018-05-22	02:02:22	2:02:22
Site 002	opossum	2018-05-22 02:02:33	2018-05-22	02:02:33	2:02:33
Site 002	opossum	2018-05-27 01:41:28	2018-05-27	01:41:28	1:41:28
Site 002	opossum	2018-05-27 01:44:46	2018-05-27	01:44:46	1:44:46
Site 002	opossum	2018-05-28 21:44:10	2018-05-28	21:44:10	21:44:10
Site 002	opossum	2018-05-28 21:50:22	2018-05-28	21:50:22	21:50:22
Site 002	opossum	2018-05-28 22:44:49	2018-05-28	22:44:49	22:44:49
Site 002	opossum	2018-05-29 23:10:11	2018-05-29	23:10:11	23:10:11
Site 002	opossum	2018-05-31 21:24:56	2018-05-31	21:24:56	21:24:56
Site 002	opossum	2018-05-31 21:26:46	2018-05-31	21:26:46	21:26:46
Site 002	opossum	2018-06-04 22:03:00	2018-06-04	22:03:00	22:03:00
Site 002	opossum	2018-06-06 22:06:58	2018-06-06	22:06:58	22:06:58
Site 002	opossum	2018-06-07 21:37:45	2018-06-07	21:37:45	21:37:45
Site 002	opossum	2018-06-13 01:32:29	2018-06-13	01:32:29	1:32:29
Site 002	opossum	2018-06-15 03:30:22	2018-06-15	03:30:22	3:30:22
Site 002	opossum	2018-06-15 03:52:05	2018-06-15	03:52:05	3:52:05
Site 002	opossum	2018-06-18 01:12:12	2018-06-18	01:12:12	1:12:12
Site 002	opossum	2018-06-18 01:12:25	2018-06-18	01:12:25	1:12:25
Site 002	opossum	2018-06-19 22:52:03	2018-06-19	22:52:03	22:52:03
Site 002	opossum	2018-06-19 22:52:04	2018-06-19	22:52:04	22:52:04
Site 002	opossum	2018-06-19 23:44:43	2018-06-19	23:44:43	23:44:43
Site 002	opossum	2018-06-22 23:20:10	2018-06-22	23:20:10	23:20:10
Site 002	opossum	2018-06-25 00:45:53	2018-06-25	00:45:53	0:45:53
Site 002	opossum	2018-06-27 21:16:27	2018-06-27	21:16:27	21:16:27
Site 002	opossum	2018-06-30 22:22:09	2018-06-30	22:22:09	22:22:09
Site 002	opossum	2018-07-01 23:24:05	2018-07-01	23:24:05	23:24:05
Site 002	opossum	2018-07-02 00:48:04	2018-07-02	00:48:04	0:48:04
Site 002	opossum	2018-07-05 02:15:30	2018-07-05	02:15:30	2:15:30
Site 002	opossum	2018-07-06 23:21:45	2018-07-06	23:21:45	23:21:45
Site 002	opossum	2018-07-08 23:55:53	2018-07-08	23:55:53	23:55:53
Site 002	opossum	2018-07-08 23:55:54	2018-07-08	23:55:54	23:55:54
Site 002	opossum	2018-07-09 02:05:59	2018-07-09	02:05:59	2:05:59
Site 002	opossum	2018-07-09 02:06:12	2018-07-09	02:06:12	2:06:12
Site 002	opossum	2018-07-15 23:50:25	2018-07-15	23:50:25	23:50:25
Site 002	raccoon	2018-04-19 20:26:46	2018-04-19	20:26:46	20:26:46
Site 002	raccoon	2018-04-19 20:26:48	2018-04-19	20:26:48	20:26:48
Site 002	raccoon	2018-04-19 21:26:30	2018-04-19	21:26:30	21:26:30
Site 002	raccoon	2018-04-19 21:26:31	2018-04-19	21:26:31	21:26:31
Site 002	raccoon	2018-04-19 21:26:35	2018-04-19	21:26:35	21:26:35
Site 002	raccoon	2018-04-19 21:26:37	2018-04-19	21:26:37	21:26:37
Site 002	raccoon	2018-04-19 21:26:38	2018-04-19	21:26:38	21:26:38
Site 002	raccoon	2018-04-19 21:26:41	2018-04-19	21:26:41	21:26:41
Site 002	raccoon	2018-04-19 21:26:42	2018-04-19	21:26:42	21:26:42
Site 002	raccoon	2018-04-19 21:26:43	2018-04-19	21:26:43	21:26:43
Site 002	raccoon	2018-04-19 21:26:44	2018-04-19	21:26:44	21:26:44
Site 002	raccoon	2018-04-19 21:26:46	2018-04-19	21:26:46	21:26:46
Site 002	raccoon	2018-04-20 21:13:07	2018-04-20	21:13:07	21:13:07
Site 002	raccoon	2018-04-21 21:22:02	2018-04-21	21:22:02	21:22:02
Site 002	raccoon	2018-04-21 21:22:26	2018-04-21	21:22:26	21:22:26
Site 002	raccoon	2018-04-21 21:23:45	2018-04-21	21:23:45	21:23:45
Site 002	raccoon	2018-04-22 00:28:13	2018-04-22	00:28:13	0:28:13
Site 002	raccoon	2018-04-22 00:29:21	2018-04-22	00:29:21	0:29:21
Site 002	raccoon	2018-04-22 00:37:37	2018-04-22	00:37:37	0:37:37
Site 002	raccoon	2018-04-22 20:06:31	2018-04-22	20:06:31	20:06:31
Site 002	raccoon	2018-04-22 20:14:57	2018-04-22	20:14:57	20:14:57
Site 002	raccoon	2018-04-22 21:50:24	2018-04-22	21:50:24	21:50:24
Site 002	raccoon	2018-04-22 21:54:09	2018-04-22	21:54:09	21:54:09
Site 002	raccoon	2018-04-23 02:14:21	2018-04-23	02:14:21	2:14:21
Site 002	raccoon	2018-04-23 21:51:45	2018-04-23	21:51:45	21:51:45
Site 002	raccoon	2018-04-23 22:14:28	2018-04-23	22:14:28	22:14:28
Site 002	raccoon	2018-04-23 22:27:16	2018-04-23	22:27:16	22:27:16
Site 002	raccoon	2018-04-24 00:19:26	2018-04-24	00:19:26	0:19:26
Site 002	raccoon	2018-04-24 00:19:44	2018-04-24	00:19:44	0:19:44
Site 002	raccoon	2018-04-24 22:32:30	2018-04-24	22:32:30	22:32:30
Site 002	raccoon	2018-04-24 23:21:42	2018-04-24	23:21:42	23:21:42
Site 002	raccoon	2018-04-24 23:25:13	2018-04-24	23:25:13	23:25:13
Site 002	raccoon	2018-04-24 23:31:38	2018-04-24	23:31:38	23:31:38
Site 002	raccoon	2018-04-25 00:25:36	2018-04-25	00:25:36	0:25:36
Site 002	raccoon	2018-04-25 00:29:08	2018-04-25	00:29:08	0:29:08
Site 002	raccoon	2018-04-25 00:29:46	2018-04-25	00:29:46	0:29:46
Site 002	raccoon	2018-04-25 02:01:45	2018-04-25	02:01:45	2:01:45
Site 002	raccoon	2018-04-25 22:43:19	2018-04-25	22:43:19	22:43:19
Site 002	raccoon	2018-04-26 00:33:53	2018-04-26	00:33:53	0:33:53
Site 002	raccoon	2018-04-26 00:37:54	2018-04-26	00:37:54	0:37:54
Site 002	raccoon	2018-04-26 00:38:33	2018-04-26	00:38:33	0:38:33
Site 002	raccoon	2018-04-27 00:18:15	2018-04-27	00:18:15	0:18:15
Site 002	raccoon	2018-04-27 00:20:10	2018-04-27	00:20:10	0:20:10
Site 002	raccoon	2018-04-28 02:56:22	2018-04-28	02:56:22	2:56:22
Site 002	raccoon	2018-04-28 02:56:23	2018-04-28	02:56:23	2:56:23
Site 002	raccoon	2018-04-28 19:56:25	2018-04-28	19:56:25	19:56:25
Site 002	raccoon	2018-04-28 23:53:57	2018-04-28	23:53:57	23:53:57
Site 002	raccoon	2018-04-29 22:10:00	2018-04-29	22:10:00	22:10:00
Site 002	raccoon	2018-04-29 22:11:19	2018-04-29	22:11:19	22:11:19
Site 002	raccoon	2018-05-02 03:26:21	2018-05-02	03:26:21	3:26:21
Site 002	raccoon	2018-05-02 20:46:29	2018-05-02	20:46:29	20:46:29
Site 002	raccoon	2018-05-03 23:01:03	2018-05-03	23:01:03	23:01:03
Site 002	raccoon	2018-05-04 20:12:03	2018-05-04	20:12:03	20:12:03
Site 002	raccoon	2018-05-05 00:13:31	2018-05-05	00:13:31	0:13:31
Site 002	raccoon	2018-05-09 05:05:01	2018-05-09	05:05:01	5:05:01
Site 002	raccoon	2018-05-09 23:10:14	2018-05-09	23:10:14	23:10:14
Site 002	raccoon	2018-05-09 23:10:42	2018-05-09	23:10:42	23:10:42
Site 002	raccoon	2018-05-11 01:04:10	2018-05-11	01:04:10	1:04:10
Site 002	raccoon	2018-05-12 00:44:11	2018-05-12	00:44:11	0:44:11
Site 002	raccoon	2018-05-12 00:45:26	2018-05-12	00:45:26	0:45:26
Site 002	raccoon	2018-05-12 02:51:01	2018-05-12	02:51:01	2:51:01
Site 002	raccoon	2018-05-16 20:44:19	2018-05-16	20:44:19	20:44:19
Site 002	raccoon	2018-05-21 20:00:23	2018-05-21	20:00:23	20:00:23
Site 002	raccoon	2018-05-22 23:02:42	2018-05-22	23:02:42	23:02:42
Site 002	raccoon	2018-05-22 23:02:44	2018-05-22	23:02:44	23:02:44
Site 002	raccoon	2018-06-05 20:10:52	2018-06-05	20:10:52	20:10:52
Site 002	raccoon	2018-06-05 20:11:10	2018-06-05	20:11:10	20:11:10
Site 002	raccoon	2018-06-10 03:18:30	2018-06-10	03:18:30	3:18:30
Site 002	raccoon	2018-06-13 22:07:45	2018-06-13	22:07:45	22:07:45
Site 002	raccoon	2018-06-13 22:09:03	2018-06-13	22:09:03	22:09:03
Site 002	raccoon	2018-06-14 03:06:33	2018-06-14	03:06:33	3:06:33
Site 002	raccoon	2018-06-14 03:06:43	2018-06-14	03:06:43	3:06:43
Site 002	raccoon	2018-06-15 02:18:46	2018-06-15	02:18:46	2:18:46
Site 002	raccoon	2018-06-29 23:38:29	2018-06-29	23:38:29	23:38:29
Site 002	raccoon	2018-08-14 23:04:58	2018-08-14	23:04:58	23:04:58
Site 002	raccoon	2018-08-14 23:05:00	2018-08-14	23:05:00	23:05:00
Site 003	bobcat	2018-04-30 03:39:01	2018-04-30	03:39:01	3:39:01
Site 003	bobcat	2018-04-30 03:40:34	2018-04-30	03:40:34	3:40:34
Site 003	bobcat	2018-07-11 09:22:30	2018-07-11	09:22:30	9:22:30
Site 003	bobcat	2018-07-11 18:39:41	2018-07-11	18:39:41	18:39:41
Site 003	bobcat	2018-07-12 09:40:06	2018-07-12	09:40:06	9:40:06
Site 003	bobcat	2018-07-12 17:10:28	2018-07-12	17:10:28	17:10:28
Site 003	bobcat	2018-07-15 21:15:09	2018-07-15	21:15:09	21:15:09
Site 003	bobcat	2018-09-24 21:40:45	2018-09-24	21:40:45	21:40:45
Site 003	bobcat	2018-11-04 23:58:22	2018-11-04	23:58:22	23:58:22
Site 003	bobcat	2018-11-17 06:14:53	2018-11-17	06:14:53	6:14:53
Site 003	bobcat	2018-12-10 01:00:38	2018-12-10	01:00:38	1:00:38
Site 003	bobcat	2018-12-17 01:37:15	2018-12-17	01:37:15	1:37:15
Site 003	bobcat	2018-12-17 03:47:11	2018-12-17	03:47:11	3:47:11
Site 003	bobcat	2018-12-17 04:34:13	2018-12-17	04:34:13	4:34:13
Site 003	bobcat	2018-12-18 03:59:55	2018-12-18	03:59:55	3:59:55
Site 003	bobcat	2018-12-20 01:05:54	2018-12-20	01:05:54	1:05:54
Site 003	bobcat	2018-12-29 05:26:47	2018-12-29	05:26:47	5:26:47
Site 003	bobcat	2018-12-30 07:29:34	2018-12-30	07:29:34	7:29:34
Site 003	bobcat	2018-12-31 00:15:09	2018-12-31	00:15:09	0:15:09
Site 003	bobcat	2019-01-11 00:27:55	2019-01-11	00:27:55	0:27:55
Site 003	bobcat	2019-01-26 04:43:47	2019-01-26	04:43:47	4:43:47
Site 003	opossum	2018-04-24 22:48:20	2018-04-24	22:48:20	22:48:20
Site 003	opossum	2018-04-24 22:52:37	2018-04-24	22:52:37	22:52:37
Site 003	opossum	2018-04-27 02:29:18	2018-04-27	02:29:18	2:29:18
Site 003	opossum	2018-05-05 01:09:58	2018-05-05	01:09:58	1:09:58
Site 003	opossum	2018-05-08 04:44:53	2018-05-08	04:44:53	4:44:53
Site 003	opossum	2018-05-09 23:10:42	2018-05-09	23:10:42	23:10:42
Site 003	opossum	2018-05-27 04:03:24	2018-05-27	04:03:24	4:03:24
Site 003	opossum	2018-07-10 23:03:45	2018-07-10	23:03:45	23:03:45
Site 003	opossum	2018-07-26 04:10:36	2018-07-26	04:10:36	4:10:36
Site 003	opossum	2018-07-26 04:48:39	2018-07-26	04:48:39	4:48:39
Site 003	opossum	2018-07-26 05:02:38	2018-07-26	05:02:38	5:02:38
Site 003	opossum	2018-07-26 05:15:40	2018-07-26	05:15:40	5:15:40
Site 003	opossum	2018-07-26 22:17:27	2018-07-26	22:17:27	22:17:27
Site 003	opossum	2018-07-26 23:08:13	2018-07-26	23:08:13	23:08:13
Site 003	opossum	2018-07-26 23:39:37	2018-07-26	23:39:37	23:39:37
Site 003	opossum	2018-07-26 23:53:15	2018-07-26	23:53:15	23:53:15
Site 003	opossum	2018-07-27 01:43:17	2018-07-27	01:43:17	1:43:17
Site 003	opossum	2018-07-27 01:55:00	2018-07-27	01:55:00	1:55:00
Site 003	opossum	2018-07-27 02:07:15	2018-07-27	02:07:15	2:07:15
Site 003	opossum	2018-07-29 00:56:15	2018-07-29	00:56:15	0:56:15
Site 003	opossum	2018-07-29 02:02:47	2018-07-29	02:02:47	2:02:47
Site 003	opossum	2018-07-29 02:54:19	2018-07-29	02:54:19	2:54:19
Site 003	opossum	2018-07-29 03:13:06	2018-07-29	03:13:06	3:13:06
Site 003	opossum	2018-07-29 04:47:14	2018-07-29	04:47:14	4:47:14
Site 003	opossum	2018-07-31 01:39:48	2018-07-31	01:39:48	1:39:48
Site 003	opossum	2018-07-31 01:55:17	2018-07-31	01:55:17	1:55:17
Site 003	opossum	2018-07-31 03:45:22	2018-07-31	03:45:22	3:45:22
Site 003	opossum	2018-07-31 05:20:19	2018-07-31	05:20:19	5:20:19
Site 003	opossum	2018-08-02 23:17:40	2018-08-02	23:17:40	23:17:40
Site 003	opossum	2018-08-03 00:52:26	2018-08-03	00:52:26	0:52:26
Site 003	opossum	2018-08-03 01:03:35	2018-08-03	01:03:35	1:03:35
Site 003	opossum	2018-08-03 03:49:32	2018-08-03	03:49:32	3:49:32
Site 003	opossum	2018-08-03 05:04:09	2018-08-03	05:04:09	5:04:09
Site 003	opossum	2018-08-03 21:08:05	2018-08-03	21:08:05	21:08:05
Site 003	opossum	2018-08-04 00:01:13	2018-08-04	00:01:13	0:01:13
Site 003	opossum	2018-08-04 01:37:36	2018-08-04	01:37:36	1:37:36
Site 003	opossum	2018-08-04 04:09:51	2018-08-04	04:09:51	4:09:51
Site 003	opossum	2018-08-04 04:48:33	2018-08-04	04:48:33	4:48:33
Site 003	opossum	2018-08-04 21:13:43	2018-08-04	21:13:43	21:13:43
Site 003	opossum	2018-08-05 00:58:41	2018-08-05	00:58:41	0:58:41
Site 003	opossum	2018-08-05 02:22:41	2018-08-05	02:22:41	2:22:41
Site 003	opossum	2018-08-05 03:09:10	2018-08-05	03:09:10	3:09:10
Site 003	opossum	2018-08-05 23:43:47	2018-08-05	23:43:47	23:43:47
Site 003	opossum	2018-08-06 02:19:51	2018-08-06	02:19:51	2:19:51
Site 003	opossum	2018-08-06 21:11:55	2018-08-06	21:11:55	21:11:55
Site 003	opossum	2018-08-06 23:56:50	2018-08-06	23:56:50	23:56:50
Site 003	opossum	2018-08-07 00:11:25	2018-08-07	00:11:25	0:11:25
Site 003	opossum	2018-08-07 02:05:33	2018-08-07	02:05:33	2:05:33
Site 003	opossum	2018-08-07 23:04:11	2018-08-07	23:04:11	23:04:11
Site 003	opossum	2018-08-08 01:25:50	2018-08-08	01:25:50	1:25:50
Site 003	opossum	2018-08-08 23:32:56	2018-08-08	23:32:56	23:32:56
Site 003	opossum	2018-08-09 02:04:31	2018-08-09	02:04:31	2:04:31
Site 003	opossum	2018-08-09 04:31:33	2018-08-09	04:31:33	4:31:33
Site 003	opossum	2018-08-09 05:09:39	2018-08-09	05:09:39	5:09:39
Site 003	opossum	2018-08-09 21:16:31	2018-08-09	21:16:31	21:16:31
Site 003	opossum	2018-08-09 23:41:15	2018-08-09	23:41:15	23:41:15
Site 003	opossum	2018-08-10 04:14:55	2018-08-10	04:14:55	4:14:55
Site 003	opossum	2018-08-10 21:45:09	2018-08-10	21:45:09	21:45:09
Site 003	opossum	2018-08-11 00:41:18	2018-08-11	00:41:18	0:41:18
Site 003	opossum	2018-08-11 21:08:33	2018-08-11	21:08:33	21:08:33
Site 003	opossum	2018-08-11 22:50:08	2018-08-11	22:50:08	22:50:08
Site 003	opossum	2018-08-12 02:54:43	2018-08-12	02:54:43	2:54:43
Site 003	opossum	2018-08-12 03:44:47	2018-08-12	03:44:47	3:44:47
Site 003	opossum	2018-08-12 03:50:25	2018-08-12	03:50:25	3:50:25
Site 003	opossum	2018-08-12 04:39:41	2018-08-12	04:39:41	4:39:41
Site 003	opossum	2018-08-12 22:11:55	2018-08-12	22:11:55	22:11:55
Site 003	opossum	2018-08-13 01:00:55	2018-08-13	01:00:55	1:00:55
Site 003	opossum	2018-08-13 02:31:09	2018-08-13	02:31:09	2:31:09
Site 003	opossum	2018-08-13 22:28:19	2018-08-13	22:28:19	22:28:19
Site 003	opossum	2018-08-14 05:33:31	2018-08-14	05:33:31	5:33:31
Site 003	opossum	2018-08-14 22:48:42	2018-08-14	22:48:42	22:48:42
Site 003	opossum	2018-08-14 23:37:47	2018-08-14	23:37:47	23:37:47
Site 003	opossum	2018-08-14 23:38:52	2018-08-14	23:38:52	23:38:52
Site 003	opossum	2018-08-15 02:12:12	2018-08-15	02:12:12	2:12:12
Site 003	opossum	2018-08-15 20:49:28	2018-08-15	20:49:28	20:49:28
Site 003	opossum	2018-08-15 20:56:33	2018-08-15	20:56:33	20:56:33
Site 003	opossum	2018-08-15 21:35:01	2018-08-15	21:35:01	21:35:01
Site 003	opossum	2018-08-15 23:21:59	2018-08-15	23:21:59	23:21:59
Site 003	opossum	2018-08-16 02:18:27	2018-08-16	02:18:27	2:18:27
Site 003	opossum	2018-08-16 23:40:17	2018-08-16	23:40:17	23:40:17
Site 003	opossum	2018-08-17 01:03:52	2018-08-17	01:03:52	1:03:52
Site 003	opossum	2018-08-17 01:37:39	2018-08-17	01:37:39	1:37:39
Site 003	opossum	2018-08-17 03:27:48	2018-08-17	03:27:48	3:27:48
Site 003	opossum	2018-08-18 02:07:51	2018-08-18	02:07:51	2:07:51
Site 003	opossum	2018-08-18 02:09:11	2018-08-18	02:09:11	2:09:11
Site 003	opossum	2018-08-18 03:41:19	2018-08-18	03:41:19	3:41:19
Site 003	opossum	2018-08-19 01:27:04	2018-08-19	01:27:04	1:27:04
Site 003	opossum	2018-08-19 02:12:36	2018-08-19	02:12:36	2:12:36
Site 003	opossum	2018-08-19 03:46:52	2018-08-19	03:46:52	3:46:52
Site 003	opossum	2018-08-20 01:20:25	2018-08-20	01:20:25	1:20:25
Site 003	opossum	2018-08-20 03:05:29	2018-08-20	03:05:29	3:05:29
Site 003	opossum	2018-08-21 00:29:29	2018-08-21	00:29:29	0:29:29
Site 003	opossum	2018-08-21 02:17:46	2018-08-21	02:17:46	2:17:46
Site 003	opossum	2018-08-23 04:05:43	2018-08-23	04:05:43	4:05:43
Site 003	opossum	2018-08-23 04:13:32	2018-08-23	04:13:32	4:13:32
Site 003	opossum	2018-08-24 04:03:27	2018-08-24	04:03:27	4:03:27
Site 003	opossum	2018-08-25 02:39:14	2018-08-25	02:39:14	2:39:14
Site 003	opossum	2018-08-25 02:57:15	2018-08-25	02:57:15	2:57:15
Site 003	opossum	2018-08-26 02:17:02	2018-08-26	02:17:02	2:17:02
Site 003	opossum	2018-08-27 02:49:29	2018-08-27	02:49:29	2:49:29
Site 003	opossum	2018-08-27 20:58:04	2018-08-27	20:58:04	20:58:04
Site 003	opossum	2018-08-27 23:18:18	2018-08-27	23:18:18	23:18:18
Site 003	opossum	2018-08-28 04:43:07	2018-08-28	04:43:07	4:43:07
Site 003	opossum	2018-08-28 21:21:41	2018-08-28	21:21:41	21:21:41
Site 003	opossum	2018-08-29 20:59:10	2018-08-29	20:59:10	20:59:10
Site 003	opossum	2018-08-29 23:31:16	2018-08-29	23:31:16	23:31:16
Site 003	opossum	2018-08-30 00:28:32	2018-08-30	00:28:32	0:28:32
Site 003	opossum	2018-08-30 04:16:44	2018-08-30	04:16:44	4:16:44
Site 003	opossum	2018-08-30 20:47:30	2018-08-30	20:47:30	20:47:30
Site 003	opossum	2018-08-30 20:49:33	2018-08-30	20:49:33	20:49:33
Site 003	opossum	2018-08-31 00:31:19	2018-08-31	00:31:19	0:31:19
Site 003	opossum	2018-08-31 20:30:34	2018-08-31	20:30:34	20:30:34
Site 003	opossum	2018-08-31 20:35:54	2018-08-31	20:35:54	20:35:54
Site 003	opossum	2018-08-31 20:52:08	2018-08-31	20:52:08	20:52:08
Site 003	opossum	2018-09-01 00:46:56	2018-09-01	00:46:56	0:46:56
Site 003	opossum	2018-09-01 01:03:12	2018-09-01	01:03:12	1:03:12
Site 003	opossum	2018-09-01 01:19:39	2018-09-01	01:19:39	1:19:39
Site 003	opossum	2018-09-01 04:16:46	2018-09-01	04:16:46	4:16:46
Site 003	opossum	2018-09-01 20:27:52	2018-09-01	20:27:52	20:27:52
Site 003	opossum	2018-09-01 20:30:27	2018-09-01	20:30:27	20:30:27
Site 003	opossum	2018-09-02 00:41:42	2018-09-02	00:41:42	0:41:42
Site 003	opossum	2018-09-02 01:24:08	2018-09-02	01:24:08	1:24:08
Site 003	opossum	2018-09-02 03:33:15	2018-09-02	03:33:15	3:33:15
Site 003	opossum	2018-09-02 03:45:02	2018-09-02	03:45:02	3:45:02
Site 003	opossum	2018-09-02 04:37:23	2018-09-02	04:37:23	4:37:23
Site 003	opossum	2018-09-02 20:26:56	2018-09-02	20:26:56	20:26:56
Site 003	opossum	2018-09-03 01:30:31	2018-09-03	01:30:31	1:30:31
Site 003	opossum	2018-09-03 02:06:20	2018-09-03	02:06:20	2:06:20
Site 003	opossum	2018-09-03 03:55:16	2018-09-03	03:55:16	3:55:16
Site 003	opossum	2018-09-03 04:04:45	2018-09-03	04:04:45	4:04:45
Site 003	opossum	2018-09-05 01:49:20	2018-09-05	01:49:20	1:49:20
Site 003	opossum	2018-09-05 02:08:17	2018-09-05	02:08:17	2:08:17
Site 003	opossum	2018-09-05 02:59:27	2018-09-05	02:59:27	2:59:27
Site 003	opossum	2018-09-05 20:14:13	2018-09-05	20:14:13	20:14:13
Site 003	opossum	2018-09-06 03:22:19	2018-09-06	03:22:19	3:22:19
Site 003	opossum	2018-09-06 03:42:16	2018-09-06	03:42:16	3:42:16
Site 003	opossum	2018-09-07 02:06:31	2018-09-07	02:06:31	2:06:31
Site 003	opossum	2018-09-07 02:46:58	2018-09-07	02:46:58	2:46:58
Site 003	opossum	2018-09-07 03:51:29	2018-09-07	03:51:29	3:51:29
Site 003	opossum	2018-09-08 04:45:36	2018-09-08	04:45:36	4:45:36
Site 003	opossum	2018-09-08 05:08:25	2018-09-08	05:08:25	5:08:25
Site 003	opossum	2018-09-09 02:38:54	2018-09-09	02:38:54	2:38:54
Site 003	opossum	2018-09-09 03:20:28	2018-09-09	03:20:28	3:20:28
Site 003	opossum	2018-09-09 23:44:06	2018-09-09	23:44:06	23:44:06
Site 003	opossum	2018-09-10 03:19:45	2018-09-10	03:19:45	3:19:45
Site 003	opossum	2018-09-10 05:14:40	2018-09-10	05:14:40	5:14:40
Site 003	opossum	2018-09-12 04:51:37	2018-09-12	04:51:37	4:51:37
Site 003	opossum	2018-09-12 04:55:56	2018-09-12	04:55:56	4:55:56
Site 003	opossum	2018-09-15 22:51:21	2018-09-15	22:51:21	22:51:21
Site 003	opossum	2018-09-16 04:01:35	2018-09-16	04:01:35	4:01:35
Site 003	opossum	2018-09-16 04:06:12	2018-09-16	04:06:12	4:06:12
Site 003	opossum	2018-09-16 04:31:01	2018-09-16	04:31:01	4:31:01
Site 003	opossum	2018-09-17 02:51:34	2018-09-17	02:51:34	2:51:34
Site 003	opossum	2018-09-19 03:13:28	2018-09-19	03:13:28	3:13:28
Site 003	opossum	2018-09-19 03:20:08	2018-09-19	03:20:08	3:20:08
Site 003	opossum	2018-09-19 03:33:42	2018-09-19	03:33:42	3:33:42
Site 003	opossum	2018-09-25 04:02:00	2018-09-25	04:02:00	4:02:00
Site 003	opossum	2018-09-30 02:19:46	2018-09-30	02:19:46	2:19:46
Site 003	opossum	2018-09-30 04:50:51	2018-09-30	04:50:51	4:50:51
Site 003	opossum	2018-10-01 00:09:40	2018-10-01	00:09:40	0:09:40
Site 003	opossum	2018-10-01 04:42:56	2018-10-01	04:42:56	4:42:56
Site 003	opossum	2018-10-02 21:26:29	2018-10-02	21:26:29	21:26:29
Site 003	opossum	2018-10-03 01:38:38	2018-10-03	01:38:38	1:38:38
Site 003	opossum	2018-10-06 23:54:44	2018-10-06	23:54:44	23:54:44
Site 003	opossum	2018-10-07 01:05:44	2018-10-07	01:05:44	1:05:44
Site 003	opossum	2018-10-07 20:13:06	2018-10-07	20:13:06	20:13:06
Site 003	opossum	2018-10-13 22:22:46	2018-10-13	22:22:46	22:22:46
Site 003	opossum	2018-10-15 03:04:09	2018-10-15	03:04:09	3:04:09
Site 003	opossum	2018-10-15 22:56:00	2018-10-15	22:56:00	22:56:00
Site 003	opossum	2018-10-19 01:18:37	2018-10-19	01:18:37	1:18:37
Site 003	opossum	2018-10-19 01:33:27	2018-10-19	01:33:27	1:33:27
Site 003	opossum	2018-10-20 01:56:05	2018-10-20	01:56:05	1:56:05
Site 003	opossum	2018-10-20 02:37:31	2018-10-20	02:37:31	2:37:31
Site 003	opossum	2018-10-23 05:29:43	2018-10-23	05:29:43	5:29:43
Site 003	opossum	2018-10-23 21:41:15	2018-10-23	21:41:15	21:41:15
Site 003	opossum	2018-10-24 20:10:49	2018-10-24	20:10:49	20:10:49
Site 003	opossum	2018-10-25 19:55:35	2018-10-25	19:55:35	19:55:35
Site 003	opossum	2018-10-28 04:02:07	2018-10-28	04:02:07	4:02:07
Site 003	opossum	2018-10-28 19:01:22	2018-10-28	19:01:22	19:01:22
Site 003	opossum	2018-10-29 02:14:08	2018-10-29	02:14:08	2:14:08
Site 003	opossum	2018-10-29 19:01:51	2018-10-29	19:01:51	19:01:51
Site 003	opossum	2018-11-01 20:07:51	2018-11-01	20:07:51	20:07:51
Site 003	opossum	2018-11-03 00:56:49	2018-11-03	00:56:49	0:56:49
Site 003	opossum	2018-11-05 23:02:48	2018-11-05	23:02:48	23:02:48
Site 003	opossum	2018-11-15 00:53:09	2018-11-15	00:53:09	0:53:09
Site 003	opossum	2018-11-15 05:26:08	2018-11-15	05:26:08	5:26:08
Site 003	opossum	2018-11-26 21:59:50	2018-11-26	21:59:50	21:59:50
Site 003	opossum	2018-11-28 02:14:18	2018-11-28	02:14:18	2:14:18
Site 003	opossum	2018-12-02 00:42:33	2018-12-02	00:42:33	0:42:33
Site 003	opossum	2018-12-02 22:38:44	2018-12-02	22:38:44	22:38:44
Site 003	opossum	2018-12-09 21:32:17	2018-12-09	21:32:17	21:32:17
Site 003	opossum	2018-12-09 23:46:49	2018-12-09	23:46:49	23:46:49
Site 003	opossum	2018-12-12 01:02:38	2018-12-12	01:02:38	1:02:38
Site 003	opossum	2018-12-12 03:09:39	2018-12-12	03:09:39	3:09:39
Site 003	opossum	2018-12-15 23:23:25	2018-12-15	23:23:25	23:23:25
Site 003	raccoon	2018-08-03 01:27:28	2018-08-03	01:27:28	1:27:28
Site 004	bobcat	2018-04-30 02:51:34	2018-04-30	02:51:34	2:51:34
Site 004	opossum	2018-10-18 20:29:25	2018-10-18	20:29:25	20:29:25
Site 004	opossum	2018-12-30 05:46:33	2018-12-30	05:46:33	5:46:33
Site 004	opossum	2018-12-30 05:47:41	2018-12-30	05:47:41	5:47:41
Site 004	opossum	2018-12-31 01:53:32	2018-12-31	01:53:32	1:53:32
Site 004	opossum	2018-12-31 23:23:22	2018-12-31	23:23:22	23:23:22
Site 004	opossum	2019-01-02 00:50:33	2019-01-02	00:50:33	0:50:33
Site 004	opossum	2019-01-12 23:36:16	2019-01-12	23:36:16	23:36:16
Site 004	opossum	2019-01-21 04:25:33	2019-01-21	04:25:33	4:25:33
Site 004	raccoon	2018-05-19 22:07:08	2018-05-19	22:07:08	22:07:08
Site 004	raccoon	2018-05-22 00:12:31	2018-05-22	00:12:31	0:12:31
Site 004	raccoon	2018-05-24 02:37:49	2018-05-24	02:37:49	2:37:49
Site 004	raccoon	2018-05-24 02:39:08	2018-05-24	02:39:08	2:39:08
Site 004	raccoon	2018-06-03 23:59:29	2018-06-03	23:59:29	23:59:29
Site 004	raccoon	2018-06-25 04:11:23	2018-06-25	04:11:23	4:11:23
Site 004	raccoon	2018-07-07 21:43:33	2018-07-07	21:43:33	21:43:33
Site 004	raccoon	2018-07-07 21:44:45	2018-07-07	21:44:45	21:44:45
Site 004	raccoon	2018-07-08 02:04:33	2018-07-08	02:04:33	2:04:33
Site 004	raccoon	2018-07-08 21:40:59	2018-07-08	21:40:59	21:40:59
Site 004	raccoon	2018-07-14 09:39:22	2018-07-14	09:39:22	9:39:22
Site 004	raccoon	2018-07-17 02:57:33	2018-07-17	02:57:33	2:57:33
Site 004	raccoon	2018-07-18 10:02:32	2018-07-18	10:02:32	10:02:32
Site 004	raccoon	2018-07-18 23:19:20	2018-07-18	23:19:20	23:19:20
Site 004	raccoon	2018-07-31 02:14:37	2018-07-31	02:14:37	2:14:37
Site 004	raccoon	2018-08-01 23:05:32	2018-08-01	23:05:32	23:05:32
Site 004	raccoon	2018-08-06 01:52:37	2018-08-06	01:52:37	1:52:37
Site 004	raccoon	2018-08-10 21:30:04	2018-08-10	21:30:04	21:30:04
Site 004	raccoon	2018-08-11 05:43:42	2018-08-11	05:43:42	5:43:42
Site 004	raccoon	2018-08-11 05:45:37	2018-08-11	05:45:37	5:45:37
Site 004	raccoon	2018-08-11 05:48:41	2018-08-11	05:48:41	5:48:41
Site 004	raccoon	2018-08-13 22:07:36	2018-08-13	22:07:36	22:07:36
Site 004	raccoon	2018-08-14 00:58:21	2018-08-14	00:58:21	0:58:21
Site 004	raccoon	2018-08-20 00:53:50	2018-08-20	00:53:50	0:53:50
Site 004	raccoon	2018-09-02 00:03:20	2018-09-02	00:03:20	0:03:20
Site 004	raccoon	2018-09-02 00:50:44	2018-09-02	00:50:44	0:50:44
Site 004	raccoon	2018-09-02 02:19:13	2018-09-02	02:19:13	2:19:13
Site 004	raccoon	2018-10-17 05:28:02	2018-10-17	05:28:02	5:28:02
Site 004	raccoon	2018-10-18 06:29:07	2018-10-18	06:29:07	6:29:07
Site 004	raccoon	2018-10-30 23:04:48	2018-10-30	23:04:48	23:04:48
Site 004	raccoon	2018-11-15 22:33:47	2018-11-15	22:33:47	22:33:47
Site 004	raccoon	2018-12-01 05:10:19	2018-12-01	05:10:19	5:10:19
Site 004	raccoon	2018-12-14 00:49:19	2018-12-14	00:49:19	0:49:19
Site 004	raccoon	2018-12-14 19:20:25	2018-12-14	19:20:25	19:20:25
Site 004	raccoon	2018-12-23 05:10:17	2018-12-23	05:10:17	5:10:17
Site 004	raccoon	2018-12-30 21:12:11	2018-12-30	21:12:11	21:12:11
Site 004	raccoon	2019-01-02 06:10:18	2019-01-02	06:10:18	6:10:18
Site 004	raccoon	2019-01-05 03:53:58	2019-01-05	03:53:58	3:53:58
Site 004	raccoon	2019-01-07 21:57:51	2019-01-07	21:57:51	21:57:51
Site 004	raccoon	2019-01-08 00:14:11	2019-01-08	00:14:11	0:14:11
Site 004	raccoon	2019-01-08 02:15:16	2019-01-08	02:15:16	2:15:16
Site 004	raccoon	2019-01-08 02:20:02	2019-01-08	02:20:02	2:20:02
Site 004	raccoon	2019-01-13 04:08:31	2019-01-13	04:08:31	4:08:31
Site 004	raccoon	2019-01-13 07:06:17	2019-01-13	07:06:17	7:06:17
Site 004	raccoon	2019-01-13 07:13:05	2019-01-13	07:13:05	7:13:05
Site 004	raccoon	2019-01-13 07:15:13	2019-01-13	07:15:13	7:15:13
Site 004	raccoon	2019-01-13 07:16:56	2019-01-13	07:16:56	7:16:56
Site 004	raccoon	2019-01-13 23:21:46	2019-01-13	23:21:46	23:21:46
Site 005	coyote	2018-07-09 13:35:58	2018-07-09	13:35:58	13:35:58
Site 005	coyote	2018-07-10 13:48:09	2018-07-10	13:48:09	13:48:09
Site 005	coyote	2018-07-10 14:22:27	2018-07-10	14:22:27	14:22:27
Site 005	coyote	2018-07-31 21:57:12	2018-07-31	21:57:12	21:57:12
Site 005	coyote	2018-08-04 23:37:22	2018-08-04	23:37:22	23:37:22
Site 005	coyote	2018-08-05 21:06:45	2018-08-05	21:06:45	21:06:45
Site 005	coyote	2018-08-05 21:17:01	2018-08-05	21:17:01	21:17:01
Site 005	coyote	2018-08-06 10:26:34	2018-08-06	10:26:34	10:26:34
Site 005	coyote	2018-08-07 13:04:12	2018-08-07	13:04:12	13:04:12
Site 005	coyote	2018-08-07 22:07:47	2018-08-07	22:07:47	22:07:47
Site 005	coyote	2018-08-07 22:27:13	2018-08-07	22:27:13	22:27:13
Site 005	coyote	2018-08-08 01:11:33	2018-08-08	01:11:33	1:11:33
Site 005	coyote	2018-08-08 06:15:53	2018-08-08	06:15:53	6:15:53
Site 005	coyote	2018-08-08 18:52:25	2018-08-08	18:52:25	18:52:25
Site 005	coyote	2018-08-08 23:10:17	2018-08-08	23:10:17	23:10:17
Site 005	coyote	2018-08-10 10:26:07	2018-08-10	10:26:07	10:26:07
Site 005	coyote	2018-08-11 23:17:36	2018-08-11	23:17:36	23:17:36
Site 005	coyote	2018-08-12 03:01:37	2018-08-12	03:01:37	3:01:37
Site 005	coyote	2018-08-12 15:46:34	2018-08-12	15:46:34	15:46:34
Site 005	coyote	2018-08-13 14:55:04	2018-08-13	14:55:04	14:55:04
Site 005	coyote	2018-08-13 16:42:14	2018-08-13	16:42:14	16:42:14
Site 005	coyote	2018-08-13 23:26:03	2018-08-13	23:26:03	23:26:03
Site 005	coyote	2018-08-13 23:54:36	2018-08-13	23:54:36	23:54:36
Site 005	coyote	2018-08-14 13:31:34	2018-08-14	13:31:34	13:31:34
Site 005	coyote	2018-08-15 04:58:43	2018-08-15	04:58:43	4:58:43
Site 005	coyote	2018-08-15 05:03:19	2018-08-15	05:03:19	5:03:19
Site 005	coyote	2018-08-15 23:54:42	2018-08-15	23:54:42	23:54:42
Site 005	coyote	2018-08-16 20:42:45	2018-08-16	20:42:45	20:42:45
Site 005	coyote	2018-08-25 11:28:56	2018-08-25	11:28:56	11:28:56
Site 005	coyote	2018-08-27 22:20:42	2018-08-27	22:20:42	22:20:42
Site 005	coyote	2018-08-29 08:39:54	2018-08-29	08:39:54	8:39:54
Site 005	coyote	2018-08-29 20:11:15	2018-08-29	20:11:15	20:11:15
Site 005	coyote	2018-08-29 20:25:48	2018-08-29	20:25:48	20:25:48
Site 005	coyote	2018-10-04 01:29:06	2018-10-04	01:29:06	1:29:06
Site 005	coyote	2018-10-14 07:20:09	2018-10-14	07:20:09	7:20:09
Site 005	coyote	2018-10-21 23:46:46	2018-10-21	23:46:46	23:46:46
Site 005	coyote	2018-10-22 08:31:34	2018-10-22	08:31:34	8:31:34
Site 005	coyote	2018-11-08 00:11:21	2018-11-08	00:11:21	0:11:21
Site 005	coyote	2018-11-10 20:07:14	2018-11-10	20:07:14	20:07:14
Site 005	coyote	2019-01-03 00:13:15	2019-01-03	00:13:15	0:13:15
Site 005	coyote	2019-01-07 22:47:26	2019-01-07	22:47:26	22:47:26
Site 005	coyote	2019-01-13 21:06:27	2019-01-13	21:06:27	21:06:27
Site 005	coyote	2019-01-16 10:37:52	2019-01-16	10:37:52	10:37:52
Site 005	coyote	2019-01-22 01:18:53	2019-01-22	01:18:53	1:18:53
Site 005	coyote	2019-01-25 00:02:22	2019-01-25	00:02:22	0:02:22
Site 005	grey fox	2018-08-23 14:39:02	2018-08-23	14:39:02	14:39:02
Site 005	grey fox	2018-08-24 00:53:01	2018-08-24	00:53:01	0:53:01
Site 005	grey fox	2018-08-24 00:58:10	2018-08-24	00:58:10	0:58:10
Site 005	grey fox	2018-08-24 01:00:22	2018-08-24	01:00:22	1:00:22
Site 005	grey fox	2018-08-24 01:12:28	2018-08-24	01:12:28	1:12:28
Site 005	grey fox	2018-09-15 19:25:14	2018-09-15	19:25:14	19:25:14
Site 006	bobcat	2019-01-12 18:17:24	2019-01-12	18:17:24	18:17:24
Site 006	bobcat	2019-01-12 18:18:26	2019-01-12	18:18:26	18:18:26
Site 006	bobcat	2019-01-16 21:11:10	2019-01-16	21:11:10	21:11:10
Site 006	bobcat	2019-01-21 06:26:50	2019-01-21	06:26:50	6:26:50
Site 006	coyote	2018-07-04 07:21:52	2018-07-04	07:21:52	7:21:52
Site 006	opossum	2018-07-02 01:39:04	2018-07-02	01:39:04	1:39:04
Site 006	opossum	2018-07-04 23:45:43	2018-07-04	23:45:43	23:45:43
Site 006	opossum	2018-07-05 03:58:33	2018-07-05	03:58:33	3:58:33
Site 006	opossum	2018-07-05 04:10:13	2018-07-05	04:10:13	4:10:13
Site 006	opossum	2018-07-07 23:59:57	2018-07-07	23:59:57	23:59:57
Site 006	opossum	2018-07-08 01:41:23	2018-07-08	01:41:23	1:41:23
Site 006	opossum	2018-07-10 23:42:20	2018-07-10	23:42:20	23:42:20
Site 006	opossum	2018-07-14 23:45:06	2018-07-14	23:45:06	23:45:06
Site 006	opossum	2018-07-22 08:46:15	2018-07-22	08:46:15	8:46:15
Site 006	opossum	2018-07-27 07:15:59	2018-07-27	07:15:59	7:15:59
Site 006	opossum	2018-08-15 22:20:36	2018-08-15	22:20:36	22:20:36
Site 006	opossum	2018-08-16 01:13:15	2018-08-16	01:13:15	1:13:15
Site 006	opossum	2018-08-23 01:30:20	2018-08-23	01:30:20	1:30:20
Site 006	opossum	2018-08-29 22:08:14	2018-08-29	22:08:14	22:08:14
Site 006	opossum	2018-09-03 00:18:11	2018-09-03	00:18:11	0:18:11
Site 006	raccoon	2018-07-05 00:56:11	2018-07-05	00:56:11	0:56:11
Site 006	raccoon	2018-07-11 21:27:13	2018-07-11	21:27:13	21:27:13
Site 006	raccoon	2018-07-11 21:28:23	2018-07-11	21:28:23	21:28:23
Site 006	raccoon	2018-07-12 04:00:22	2018-07-12	04:00:22	4:00:22
Site 006	raccoon	2018-08-04 00:43:58	2018-08-04	00:43:58	0:43:58
Site 006	raccoon	2018-08-17 02:05:09	2018-08-17	02:05:09	2:05:09
Site 006	raccoon	2018-08-22 01:53:01	2018-08-22	01:53:01	1:53:01
Site 006	raccoon	2018-08-23 22:12:43	2018-08-23	22:12:43	22:12:43
Site 006	raccoon	2018-08-30 00:33:44	2018-08-30	00:33:44	0:33:44
Site 006	raccoon	2018-08-30 02:23:15	2018-08-30	02:23:15	2:23:15
Site 006	raccoon	2018-09-02 03:40:33	2018-09-02	03:40:33	3:40:33
Site 006	striped skunk	2018-07-02 00:03:08	2018-07-02	00:03:08	0:03:08
Site 007	bobcat	2018-06-28 01:29:08	2018-06-28	01:29:08	1:29:08
Site 007	bobcat	2018-06-29 05:55:35	2018-06-29	05:55:35	5:55:35
Site 007	bobcat	2018-07-02 01:24:34	2018-07-02	01:24:34	1:24:34
Site 007	bobcat	2018-07-24 21:58:05	2018-07-24	21:58:05	21:58:05
Site 007	bobcat	2018-08-25 01:04:23	2018-08-25	01:04:23	1:04:23
Site 007	bobcat	2018-08-25 04:24:16	2018-08-25	04:24:16	4:24:16
Site 007	bobcat	2018-09-25 22:07:08	2018-09-25	22:07:08	22:07:08
Site 007	bobcat	2018-09-26 01:39:37	2018-09-26	01:39:37	1:39:37
Site 007	grey fox	2018-09-25 03:40:25	2018-09-25	03:40:25	3:40:25
Site 007	grey fox	2018-12-06 23:13:25	2018-12-06	23:13:25	23:13:25
Site 007	grey fox	2018-12-09 05:54:48	2018-12-09	05:54:48	5:54:48
Site 007	grey fox	2018-12-09 06:00:30	2018-12-09	06:00:30	6:00:30
Site 007	grey fox	2019-01-13 01:45:55	2019-01-13	01:45:55	1:45:55
Site 007	opossum	2018-04-29 21:31:57	2018-04-29	21:31:57	21:31:57
Site 007	opossum	2018-05-01 03:09:02	2018-05-01	03:09:02	3:09:02
Site 007	opossum	2018-05-01 22:02:17	2018-05-01	22:02:17	22:02:17
Site 007	opossum	2018-05-20 23:39:14	2018-05-20	23:39:14	23:39:14
Site 007	opossum	2018-05-22 22:13:40	2018-05-22	22:13:40	22:13:40
Site 007	opossum	2018-05-28 05:19:49	2018-05-28	05:19:49	5:19:49
Site 007	opossum	2018-06-02 23:35:10	2018-06-02	23:35:10	23:35:10
Site 007	opossum	2018-06-14 01:58:59	2018-06-14	01:58:59	1:58:59
Site 007	opossum	2018-06-15 23:09:44	2018-06-15	23:09:44	23:09:44
Site 007	opossum	2018-06-16 23:28:30	2018-06-16	23:28:30	23:28:30
Site 007	opossum	2018-06-17 23:15:48	2018-06-17	23:15:48	23:15:48
Site 007	opossum	2018-06-26 00:52:50	2018-06-26	00:52:50	0:52:50
Site 007	opossum	2018-06-26 23:12:04	2018-06-26	23:12:04	23:12:04
Site 007	opossum	2018-06-28 02:18:32	2018-06-28	02:18:32	2:18:32
Site 007	opossum	2018-06-30 00:16:51	2018-06-30	00:16:51	0:16:51
Site 007	opossum	2018-06-30 02:11:44	2018-06-30	02:11:44	2:11:44
Site 007	opossum	2018-07-02 22:35:47	2018-07-02	22:35:47	22:35:47
Site 007	opossum	2018-07-03 22:15:11	2018-07-03	22:15:11	22:15:11
Site 007	opossum	2018-07-04 00:42:54	2018-07-04	00:42:54	0:42:54
Site 007	opossum	2018-07-04 00:45:30	2018-07-04	00:45:30	0:45:30
Site 007	opossum	2018-07-04 05:12:49	2018-07-04	05:12:49	5:12:49
Site 007	opossum	2018-07-05 22:19:14	2018-07-05	22:19:14	22:19:14
Site 007	opossum	2018-07-06 21:59:15	2018-07-06	21:59:15	21:59:15
Site 007	opossum	2018-07-07 03:49:36	2018-07-07	03:49:36	3:49:36
Site 007	opossum	2018-07-09 03:17:34	2018-07-09	03:17:34	3:17:34
Site 007	opossum	2018-07-10 04:10:29	2018-07-10	04:10:29	4:10:29
Site 007	opossum	2018-07-10 21:50:57	2018-07-10	21:50:57	21:50:57
Site 007	opossum	2018-07-11 02:56:13	2018-07-11	02:56:13	2:56:13
Site 007	opossum	2018-07-12 01:39:45	2018-07-12	01:39:45	1:39:45
Site 007	opossum	2018-07-13 04:21:05	2018-07-13	04:21:05	4:21:05
Site 007	opossum	2018-07-13 22:21:09	2018-07-13	22:21:09	22:21:09
Site 007	opossum	2018-07-15 22:13:49	2018-07-15	22:13:49	22:13:49
Site 007	opossum	2018-07-16 00:21:36	2018-07-16	00:21:36	0:21:36
Site 007	opossum	2018-07-16 04:41:15	2018-07-16	04:41:15	4:41:15
Site 007	opossum	2018-07-17 00:03:18	2018-07-17	00:03:18	0:03:18
Site 007	opossum	2018-07-17 00:04:37	2018-07-17	00:04:37	0:04:37
Site 007	opossum	2018-07-18 01:02:50	2018-07-18	01:02:50	1:02:50
Site 007	opossum	2018-07-19 22:56:24	2018-07-19	22:56:24	22:56:24
Site 007	opossum	2018-07-20 23:40:02	2018-07-20	23:40:02	23:40:02
Site 007	opossum	2018-07-20 23:40:08	2018-07-20	23:40:08	23:40:08
Site 007	opossum	2018-07-21 00:15:00	2018-07-21	00:15:00	0:15:00
Site 007	opossum	2018-07-21 21:05:49	2018-07-21	21:05:49	21:05:49
Site 007	opossum	2018-07-21 21:07:10	2018-07-21	21:07:10	21:07:10
Site 007	opossum	2018-07-21 21:08:11	2018-07-21	21:08:11	21:08:11
Site 007	opossum	2018-07-22 00:49:10	2018-07-22	00:49:10	0:49:10
Site 007	opossum	2018-07-22 04:13:02	2018-07-22	04:13:02	4:13:02
Site 007	opossum	2018-07-23 02:37:05	2018-07-23	02:37:05	2:37:05
Site 007	opossum	2018-07-23 02:38:09	2018-07-23	02:38:09	2:38:09
Site 007	opossum	2018-07-23 02:51:46	2018-07-23	02:51:46	2:51:46
Site 007	opossum	2018-07-23 02:53:02	2018-07-23	02:53:02	2:53:02
Site 007	opossum	2018-07-23 03:49:25	2018-07-23	03:49:25	3:49:25
Site 007	opossum	2018-07-23 21:22:56	2018-07-23	21:22:56	21:22:56
Site 007	opossum	2018-07-23 21:30:29	2018-07-23	21:30:29	21:30:29
Site 007	opossum	2018-07-24 02:17:40	2018-07-24	02:17:40	2:17:40
Site 007	opossum	2018-07-24 04:51:45	2018-07-24	04:51:45	4:51:45
Site 007	opossum	2018-07-24 21:45:18	2018-07-24	21:45:18	21:45:18
Site 007	opossum	2018-07-24 23:28:27	2018-07-24	23:28:27	23:28:27
Site 007	opossum	2018-07-25 04:53:00	2018-07-25	04:53:00	4:53:00
Site 007	opossum	2018-07-28 21:42:25	2018-07-28	21:42:25	21:42:25
Site 007	opossum	2018-07-29 02:57:08	2018-07-29	02:57:08	2:57:08
Site 007	opossum	2018-07-29 02:58:18	2018-07-29	02:58:18	2:58:18
Site 007	opossum	2018-07-31 22:21:42	2018-07-31	22:21:42	22:21:42
Site 007	opossum	2018-08-02 05:42:36	2018-08-02	05:42:36	5:42:36
Site 007	opossum	2018-08-02 21:08:50	2018-08-02	21:08:50	21:08:50
Site 007	opossum	2018-08-03 23:39:39	2018-08-03	23:39:39	23:39:39
Site 007	opossum	2018-08-05 22:21:28	2018-08-05	22:21:28	22:21:28
Site 007	opossum	2018-08-07 00:28:06	2018-08-07	00:28:06	0:28:06
Site 007	opossum	2018-08-08 21:47:53	2018-08-08	21:47:53	21:47:53
Site 007	opossum	2018-08-09 04:04:41	2018-08-09	04:04:41	4:04:41
Site 007	opossum	2018-08-10 21:59:16	2018-08-10	21:59:16	21:59:16
Site 007	opossum	2018-08-10 23:47:14	2018-08-10	23:47:14	23:47:14
Site 007	opossum	2018-08-11 01:24:02	2018-08-11	01:24:02	1:24:02
Site 007	opossum	2018-08-12 03:31:14	2018-08-12	03:31:14	3:31:14
Site 007	opossum	2018-08-12 03:37:40	2018-08-12	03:37:40	3:37:40
Site 007	opossum	2018-08-13 05:03:11	2018-08-13	05:03:11	5:03:11
Site 007	opossum	2018-08-15 01:19:42	2018-08-15	01:19:42	1:19:42
Site 007	opossum	2018-08-15 01:22:30	2018-08-15	01:22:30	1:22:30
Site 007	opossum	2018-08-15 04:58:31	2018-08-15	04:58:31	4:58:31
Site 007	opossum	2018-08-15 05:00:01	2018-08-15	05:00:01	5:00:01
Site 007	opossum	2018-08-15 20:51:24	2018-08-15	20:51:24	20:51:24
Site 007	opossum	2018-08-15 21:35:39	2018-08-15	21:35:39	21:35:39
Site 007	opossum	2018-08-15 21:37:37	2018-08-15	21:37:37	21:37:37
Site 007	opossum	2018-08-16 01:38:58	2018-08-16	01:38:58	1:38:58
Site 007	opossum	2018-08-16 02:11:53	2018-08-16	02:11:53	2:11:53
Site 007	opossum	2018-08-16 03:55:29	2018-08-16	03:55:29	3:55:29
Site 007	opossum	2018-08-16 21:04:35	2018-08-16	21:04:35	21:04:35
Site 007	opossum	2018-08-16 21:48:08	2018-08-16	21:48:08	21:48:08
Site 007	opossum	2018-08-17 05:03:12	2018-08-17	05:03:12	5:03:12
Site 007	opossum	2018-08-17 21:12:42	2018-08-17	21:12:42	21:12:42
Site 007	opossum	2018-08-18 00:35:49	2018-08-18	00:35:49	0:35:49
Site 007	opossum	2018-08-18 03:21:08	2018-08-18	03:21:08	3:21:08
Site 007	opossum	2018-08-18 03:22:09	2018-08-18	03:22:09	3:22:09
Site 007	opossum	2018-08-18 03:29:14	2018-08-18	03:29:14	3:29:14
Site 007	opossum	2018-08-18 05:24:37	2018-08-18	05:24:37	5:24:37
Site 007	opossum	2018-08-19 00:02:05	2018-08-19	00:02:05	0:02:05
Site 007	opossum	2018-08-19 00:06:04	2018-08-19	00:06:04	0:06:04
Site 007	opossum	2018-08-19 00:35:49	2018-08-19	00:35:49	0:35:49
Site 007	opossum	2018-08-19 03:48:09	2018-08-19	03:48:09	3:48:09
Site 007	opossum	2018-08-20 02:16:54	2018-08-20	02:16:54	2:16:54
Site 007	opossum	2018-08-20 02:34:15	2018-08-20	02:34:15	2:34:15
Site 007	opossum	2018-08-20 03:40:43	2018-08-20	03:40:43	3:40:43
Site 007	opossum	2018-08-21 01:15:54	2018-08-21	01:15:54	1:15:54
Site 007	opossum	2018-08-21 21:21:57	2018-08-21	21:21:57	21:21:57
Site 007	opossum	2018-08-22 01:40:43	2018-08-22	01:40:43	1:40:43
Site 007	opossum	2018-08-22 01:45:20	2018-08-22	01:45:20	1:45:20
Site 007	opossum	2018-08-22 03:37:07	2018-08-22	03:37:07	3:37:07
Site 007	opossum	2018-08-23 04:08:58	2018-08-23	04:08:58	4:08:58
Site 007	opossum	2018-08-24 04:04:01	2018-08-24	04:04:01	4:04:01
Site 007	opossum	2018-08-24 05:12:09	2018-08-24	05:12:09	5:12:09
Site 007	opossum	2018-08-24 20:42:42	2018-08-24	20:42:42	20:42:42
Site 007	opossum	2018-08-25 01:47:21	2018-08-25	01:47:21	1:47:21
Site 007	opossum	2018-08-25 22:53:55	2018-08-25	22:53:55	22:53:55
Site 007	opossum	2018-08-26 00:43:41	2018-08-26	00:43:41	0:43:41
Site 007	opossum	2018-08-27 02:10:15	2018-08-27	02:10:15	2:10:15
Site 007	opossum	2018-08-28 02:50:52	2018-08-28	02:50:52	2:50:52
Site 007	opossum	2018-08-31 01:24:31	2018-08-31	01:24:31	1:24:31
Site 007	opossum	2018-08-31 02:08:30	2018-08-31	02:08:30	2:08:30
Site 007	opossum	2018-08-31 04:31:03	2018-08-31	04:31:03	4:31:03
Site 007	opossum	2018-08-31 04:32:05	2018-08-31	04:32:05	4:32:05
Site 007	opossum	2018-08-31 20:36:38	2018-08-31	20:36:38	20:36:38
Site 007	opossum	2018-08-31 22:50:31	2018-08-31	22:50:31	22:50:31
Site 007	opossum	2018-09-01 23:25:20	2018-09-01	23:25:20	23:25:20
Site 007	opossum	2018-09-01 23:30:28	2018-09-01	23:30:28	23:30:28
Site 007	opossum	2018-09-02 01:50:30	2018-09-02	01:50:30	1:50:30
Site 007	opossum	2018-09-02 22:46:03	2018-09-02	22:46:03	22:46:03
Site 007	opossum	2018-09-03 21:32:45	2018-09-03	21:32:45	21:32:45
Site 007	opossum	2018-09-03 21:35:12	2018-09-03	21:35:12	21:35:12
Site 007	opossum	2018-09-03 22:04:48	2018-09-03	22:04:48	22:04:48
Site 007	opossum	2018-09-03 22:30:09	2018-09-03	22:30:09	22:30:09
Site 007	opossum	2018-09-03 23:06:34	2018-09-03	23:06:34	23:06:34
Site 007	opossum	2018-09-05 00:03:06	2018-09-05	00:03:06	0:03:06
Site 007	opossum	2018-09-05 03:46:17	2018-09-05	03:46:17	3:46:17
Site 007	opossum	2018-09-06 20:48:25	2018-09-06	20:48:25	20:48:25
Site 007	opossum	2018-09-06 21:46:51	2018-09-06	21:46:51	21:46:51
Site 007	opossum	2018-09-08 04:14:43	2018-09-08	04:14:43	4:14:43
Site 007	opossum	2018-09-09 00:33:07	2018-09-09	00:33:07	0:33:07
Site 007	opossum	2018-09-10 01:30:42	2018-09-10	01:30:42	1:30:42
Site 007	opossum	2018-09-11 20:45:47	2018-09-11	20:45:47	20:45:47
Site 007	opossum	2018-09-11 21:32:11	2018-09-11	21:32:11	21:32:11
Site 007	opossum	2018-09-11 22:23:51	2018-09-11	22:23:51	22:23:51
Site 007	opossum	2018-09-12 01:43:09	2018-09-12	01:43:09	1:43:09
Site 007	opossum	2018-09-12 01:50:59	2018-09-12	01:50:59	1:50:59
Site 007	opossum	2018-09-12 06:14:54	2018-09-12	06:14:54	6:14:54
Site 007	opossum	2018-09-15 00:32:42	2018-09-15	00:32:42	0:32:42
Site 007	opossum	2018-09-17 23:48:03	2018-09-17	23:48:03	23:48:03
Site 007	opossum	2018-09-18 05:10:07	2018-09-18	05:10:07	5:10:07
Site 007	opossum	2018-09-20 02:10:45	2018-09-20	02:10:45	2:10:45
Site 007	opossum	2018-09-22 20:46:56	2018-09-22	20:46:56	20:46:56
Site 007	opossum	2018-09-25 00:59:52	2018-09-25	00:59:52	0:59:52
Site 007	opossum	2018-09-25 01:04:36	2018-09-25	01:04:36	1:04:36
Site 007	opossum	2018-09-25 20:58:39	2018-09-25	20:58:39	20:58:39
Site 007	opossum	2018-09-25 23:13:38	2018-09-25	23:13:38	23:13:38
Site 007	opossum	2018-09-26 03:31:43	2018-09-26	03:31:43	3:31:43
Site 007	opossum	2018-09-26 21:20:11	2018-09-26	21:20:11	21:20:11
Site 007	opossum	2018-09-26 21:37:27	2018-09-26	21:37:27	21:37:27
Site 007	opossum	2018-09-26 22:25:24	2018-09-26	22:25:24	22:25:24
Site 007	opossum	2018-09-26 22:32:18	2018-09-26	22:32:18	22:32:18
Site 007	opossum	2018-09-27 00:07:18	2018-09-27	00:07:18	0:07:18
Site 007	opossum	2018-09-27 00:21:04	2018-09-27	00:21:04	0:21:04
Site 007	opossum	2018-09-27 21:34:39	2018-09-27	21:34:39	21:34:39
Site 007	opossum	2018-09-28 03:09:11	2018-09-28	03:09:11	3:09:11
Site 007	opossum	2018-09-28 21:10:13	2018-09-28	21:10:13	21:10:13
Site 007	opossum	2018-09-29 00:35:56	2018-09-29	00:35:56	0:35:56
Site 007	opossum	2018-09-29 02:55:39	2018-09-29	02:55:39	2:55:39
Site 007	opossum	2018-09-29 03:02:36	2018-09-29	03:02:36	3:02:36
Site 007	opossum	2018-09-29 04:17:51	2018-09-29	04:17:51	4:17:51
Site 007	opossum	2018-09-29 19:49:11	2018-09-29	19:49:11	19:49:11
Site 007	opossum	2018-09-29 21:05:25	2018-09-29	21:05:25	21:05:25
Site 007	opossum	2018-09-29 21:16:14	2018-09-29	21:16:14	21:16:14
Site 007	opossum	2018-09-30 02:01:33	2018-09-30	02:01:33	2:01:33
Site 007	opossum	2018-09-30 19:33:43	2018-09-30	19:33:43	19:33:43
Site 007	opossum	2018-09-30 20:55:52	2018-09-30	20:55:52	20:55:52
Site 007	opossum	2018-10-01 04:17:41	2018-10-01	04:17:41	4:17:41
Site 007	opossum	2018-10-01 04:24:40	2018-10-01	04:24:40	4:24:40
Site 007	opossum	2018-10-01 22:23:45	2018-10-01	22:23:45	22:23:45
Site 007	opossum	2018-10-02 00:28:09	2018-10-02	00:28:09	0:28:09
Site 007	opossum	2018-10-02 00:35:33	2018-10-02	00:35:33	0:35:33
Site 007	opossum	2018-10-02 03:21:50	2018-10-02	03:21:50	3:21:50
Site 007	opossum	2018-10-03 04:31:24	2018-10-03	04:31:24	4:31:24
Site 007	opossum	2018-10-03 20:51:03	2018-10-03	20:51:03	20:51:03
Site 007	opossum	2018-10-03 21:12:35	2018-10-03	21:12:35	21:12:35
Site 007	opossum	2018-10-03 21:14:14	2018-10-03	21:14:14	21:14:14
Site 007	opossum	2018-10-04 05:19:40	2018-10-04	05:19:40	5:19:40
Site 007	opossum	2018-10-04 21:36:28	2018-10-04	21:36:28	21:36:28
Site 007	opossum	2018-10-05 05:23:25	2018-10-05	05:23:25	5:23:25
Site 007	opossum	2018-10-05 19:51:48	2018-10-05	19:51:48	19:51:48
Site 007	opossum	2018-10-05 23:00:57	2018-10-05	23:00:57	23:00:57
Site 007	opossum	2018-10-06 03:59:51	2018-10-06	03:59:51	3:59:51
Site 007	opossum	2018-10-06 21:55:46	2018-10-06	21:55:46	21:55:46
Site 007	opossum	2018-10-06 22:16:08	2018-10-06	22:16:08	22:16:08
Site 007	opossum	2018-10-06 23:55:08	2018-10-06	23:55:08	23:55:08
Site 007	opossum	2018-10-07 00:47:36	2018-10-07	00:47:36	0:47:36
Site 007	opossum	2018-10-08 19:50:09	2018-10-08	19:50:09	19:50:09
Site 007	opossum	2018-10-08 23:55:00	2018-10-08	23:55:00	23:55:00
Site 007	opossum	2018-10-09 03:54:56	2018-10-09	03:54:56	3:54:56
Site 007	opossum	2018-10-09 22:23:56	2018-10-09	22:23:56	22:23:56
Site 007	opossum	2018-10-10 20:40:59	2018-10-10	20:40:59	20:40:59
Site 007	opossum	2018-10-10 23:43:17	2018-10-10	23:43:17	23:43:17
Site 007	opossum	2018-10-11 02:06:18	2018-10-11	02:06:18	2:06:18
Site 007	opossum	2018-10-11 02:13:14	2018-10-11	02:13:14	2:13:14
Site 007	opossum	2018-10-11 22:41:26	2018-10-11	22:41:26	22:41:26
Site 007	opossum	2018-10-11 23:44:56	2018-10-11	23:44:56	23:44:56
Site 007	opossum	2018-10-13 23:22:58	2018-10-13	23:22:58	23:22:58
Site 007	opossum	2018-10-14 01:25:29	2018-10-14	01:25:29	1:25:29
Site 007	opossum	2018-10-14 22:53:07	2018-10-14	22:53:07	22:53:07
Site 007	opossum	2018-10-14 23:04:46	2018-10-14	23:04:46	23:04:46
Site 007	opossum	2018-10-15 03:20:01	2018-10-15	03:20:01	3:20:01
Site 007	opossum	2018-10-16 02:36:37	2018-10-16	02:36:37	2:36:37
Site 007	opossum	2018-10-16 04:06:16	2018-10-16	04:06:16	4:06:16
Site 007	opossum	2018-10-16 19:50:42	2018-10-16	19:50:42	19:50:42
Site 007	opossum	2018-10-16 21:36:50	2018-10-16	21:36:50	21:36:50
Site 007	opossum	2018-10-16 22:19:59	2018-10-16	22:19:59	22:19:59
Site 007	opossum	2018-10-17 05:22:47	2018-10-17	05:22:47	5:22:47
Site 007	opossum	2018-10-17 20:33:49	2018-10-17	20:33:49	20:33:49
Site 007	opossum	2018-10-17 22:07:39	2018-10-17	22:07:39	22:07:39
Site 007	opossum	2018-10-18 00:03:48	2018-10-18	00:03:48	0:03:48
Site 007	opossum	2018-10-18 04:17:55	2018-10-18	04:17:55	4:17:55
Site 007	opossum	2018-10-18 05:04:00	2018-10-18	05:04:00	5:04:00
Site 007	opossum	2018-10-18 20:51:19	2018-10-18	20:51:19	20:51:19
Site 007	opossum	2018-10-18 21:43:22	2018-10-18	21:43:22	21:43:22
Site 007	opossum	2018-10-18 21:47:11	2018-10-18	21:47:11	21:47:11
Site 007	opossum	2018-10-18 22:27:55	2018-10-18	22:27:55	22:27:55
Site 007	opossum	2018-10-19 00:53:43	2018-10-19	00:53:43	0:53:43
Site 007	opossum	2018-10-19 00:56:16	2018-10-19	00:56:16	0:56:16
Site 007	opossum	2018-10-19 01:20:39	2018-10-19	01:20:39	1:20:39
Site 007	opossum	2018-10-19 01:52:15	2018-10-19	01:52:15	1:52:15
Site 007	opossum	2018-10-19 03:33:28	2018-10-19	03:33:28	3:33:28
Site 007	opossum	2018-10-19 21:23:49	2018-10-19	21:23:49	21:23:49
Site 007	opossum	2018-10-20 02:38:41	2018-10-20	02:38:41	2:38:41
Site 007	opossum	2018-10-20 02:46:58	2018-10-20	02:46:58	2:46:58
Site 007	opossum	2018-10-20 03:58:52	2018-10-20	03:58:52	3:58:52
Site 007	opossum	2018-10-20 20:25:59	2018-10-20	20:25:59	20:25:59
Site 007	opossum	2018-10-20 21:01:40	2018-10-20	21:01:40	21:01:40
Site 007	opossum	2018-10-20 23:21:31	2018-10-20	23:21:31	23:21:31
Site 007	opossum	2018-10-21 00:19:12	2018-10-21	00:19:12	0:19:12
Site 007	opossum	2018-10-21 06:40:19	2018-10-21	06:40:19	6:40:19
Site 007	opossum	2018-10-21 20:22:47	2018-10-21	20:22:47	20:22:47
Site 007	opossum	2018-10-21 22:41:55	2018-10-21	22:41:55	22:41:55
Site 007	opossum	2018-10-22 00:23:32	2018-10-22	00:23:32	0:23:32
Site 007	opossum	2018-10-22 00:33:14	2018-10-22	00:33:14	0:33:14
Site 007	opossum	2018-10-22 01:57:35	2018-10-22	01:57:35	1:57:35
Site 007	opossum	2018-10-22 05:32:29	2018-10-22	05:32:29	5:32:29
Site 007	opossum	2018-10-22 22:04:38	2018-10-22	22:04:38	22:04:38
Site 007	opossum	2018-10-23 02:19:53	2018-10-23	02:19:53	2:19:53
Site 007	opossum	2018-10-23 04:10:04	2018-10-23	04:10:04	4:10:04
Site 007	opossum	2018-10-23 21:09:30	2018-10-23	21:09:30	21:09:30
Site 007	opossum	2018-10-24 00:02:08	2018-10-24	00:02:08	0:02:08
Site 007	opossum	2018-10-24 00:05:52	2018-10-24	00:05:52	0:05:52
Site 007	opossum	2018-10-24 05:33:03	2018-10-24	05:33:03	5:33:03
Site 007	opossum	2018-10-24 06:17:24	2018-10-24	06:17:24	6:17:24
Site 007	opossum	2018-10-24 19:48:07	2018-10-24	19:48:07	19:48:07
Site 007	opossum	2018-10-24 20:55:47	2018-10-24	20:55:47	20:55:47
Site 007	opossum	2018-10-25 00:36:10	2018-10-25	00:36:10	0:36:10
Site 007	opossum	2018-10-25 05:23:46	2018-10-25	05:23:46	5:23:46
Site 007	opossum	2018-10-25 19:18:12	2018-10-25	19:18:12	19:18:12
Site 007	opossum	2018-10-25 22:38:58	2018-10-25	22:38:58	22:38:58
Site 007	opossum	2018-10-25 23:18:57	2018-10-25	23:18:57	23:18:57
Site 007	opossum	2018-10-26 02:34:11	2018-10-26	02:34:11	2:34:11
Site 007	opossum	2018-10-26 04:24:25	2018-10-26	04:24:25	4:24:25
Site 007	opossum	2018-10-26 05:01:05	2018-10-26	05:01:05	5:01:05
Site 007	opossum	2018-10-26 20:36:56	2018-10-26	20:36:56	20:36:56
Site 007	opossum	2018-10-26 22:15:21	2018-10-26	22:15:21	22:15:21
Site 007	opossum	2018-10-27 20:28:20	2018-10-27	20:28:20	20:28:20
Site 007	opossum	2018-10-28 01:20:12	2018-10-28	01:20:12	1:20:12
Site 007	opossum	2018-10-28 01:43:45	2018-10-28	01:43:45	1:43:45
Site 007	opossum	2018-10-28 02:12:32	2018-10-28	02:12:32	2:12:32
Site 007	opossum	2018-10-28 04:09:18	2018-10-28	04:09:18	4:09:18
Site 007	opossum	2018-10-28 07:04:47	2018-10-28	07:04:47	7:04:47
Site 007	opossum	2018-10-28 20:50:13	2018-10-28	20:50:13	20:50:13
Site 007	opossum	2018-10-29 05:28:09	2018-10-29	05:28:09	5:28:09
Site 007	opossum	2018-10-29 20:11:47	2018-10-29	20:11:47	20:11:47
Site 007	opossum	2018-10-29 20:41:52	2018-10-29	20:41:52	20:41:52
Site 007	opossum	2018-10-29 21:29:12	2018-10-29	21:29:12	21:29:12
Site 007	opossum	2018-10-29 23:42:02	2018-10-29	23:42:02	23:42:02
Site 007	opossum	2018-10-30 01:00:20	2018-10-30	01:00:20	1:00:20
Site 007	opossum	2018-10-30 02:58:50	2018-10-30	02:58:50	2:58:50
Site 007	opossum	2018-10-30 04:08:43	2018-10-30	04:08:43	4:08:43
Site 007	opossum	2018-10-30 06:03:08	2018-10-30	06:03:08	6:03:08
Site 007	opossum	2018-10-30 23:36:17	2018-10-30	23:36:17	23:36:17
Site 007	opossum	2018-10-31 03:05:06	2018-10-31	03:05:06	3:05:06
Site 007	opossum	2018-10-31 20:38:16	2018-10-31	20:38:16	20:38:16
Site 007	opossum	2018-10-31 22:41:02	2018-10-31	22:41:02	22:41:02
Site 007	opossum	2018-11-01 00:45:33	2018-11-01	00:45:33	0:45:33
Site 007	opossum	2018-11-01 00:51:52	2018-11-01	00:51:52	0:51:52
Site 007	opossum	2018-11-01 00:52:52	2018-11-01	00:52:52	0:52:52
Site 007	opossum	2018-11-01 00:53:53	2018-11-01	00:53:53	0:53:53
Site 007	opossum	2018-11-01 04:32:12	2018-11-01	04:32:12	4:32:12
Site 007	opossum	2018-11-01 06:26:41	2018-11-01	06:26:41	6:26:41
Site 007	opossum	2018-11-02 00:23:56	2018-11-02	00:23:56	0:23:56
Site 007	opossum	2018-11-03 01:18:34	2018-11-03	01:18:34	1:18:34
Site 007	opossum	2018-11-03 01:41:44	2018-11-03	01:41:44	1:41:44
Site 007	opossum	2018-11-03 03:09:59	2018-11-03	03:09:59	3:09:59
Site 007	opossum	2018-11-03 23:25:23	2018-11-03	23:25:23	23:25:23
Site 007	opossum	2018-11-05 00:09:41	2018-11-05	00:09:41	0:09:41
Site 007	opossum	2018-11-05 01:44:08	2018-11-05	01:44:08	1:44:08
Site 007	opossum	2018-11-06 02:25:36	2018-11-06	02:25:36	2:25:36
Site 007	opossum	2018-11-06 03:27:37	2018-11-06	03:27:37	3:27:37
Site 007	opossum	2018-11-06 23:42:20	2018-11-06	23:42:20	23:42:20
Site 007	opossum	2018-11-08 02:14:58	2018-11-08	02:14:58	2:14:58
Site 007	opossum	2018-11-09 22:56:12	2018-11-09	22:56:12	22:56:12
Site 007	opossum	2018-11-10 20:11:58	2018-11-10	20:11:58	20:11:58
Site 007	opossum	2018-11-11 00:21:58	2018-11-11	00:21:58	0:21:58
Site 007	opossum	2018-11-13 02:54:54	2018-11-13	02:54:54	2:54:54
Site 007	opossum	2018-11-14 21:51:38	2018-11-14	21:51:38	21:51:38
Site 007	opossum	2018-11-16 05:48:55	2018-11-16	05:48:55	5:48:55
Site 007	opossum	2018-11-16 22:33:59	2018-11-16	22:33:59	22:33:59
Site 007	opossum	2018-11-17 06:22:58	2018-11-17	06:22:58	6:22:58
Site 007	opossum	2018-11-18 00:07:39	2018-11-18	00:07:39	0:07:39
Site 007	opossum	2018-11-21 07:13:42	2018-11-21	07:13:42	7:13:42
Site 007	opossum	2018-11-22 07:24:40	2018-11-22	07:24:40	7:24:40
Site 007	opossum	2018-11-24 04:45:40	2018-11-24	04:45:40	4:45:40
Site 007	opossum	2018-11-26 01:35:07	2018-11-26	01:35:07	1:35:07
Site 007	opossum	2018-11-27 03:58:58	2018-11-27	03:58:58	3:58:58
Site 007	opossum	2018-11-28 06:16:41	2018-11-28	06:16:41	6:16:41
Site 007	opossum	2018-11-28 06:17:42	2018-11-28	06:17:42	6:17:42
Site 007	opossum	2018-11-29 05:25:26	2018-11-29	05:25:26	5:25:26
Site 007	opossum	2018-11-30 01:13:10	2018-11-30	01:13:10	1:13:10
Site 007	opossum	2018-11-30 05:24:03	2018-11-30	05:24:03	5:24:03
Site 007	opossum	2018-12-01 05:40:06	2018-12-01	05:40:06	5:40:06
Site 007	opossum	2018-12-02 01:53:08	2018-12-02	01:53:08	1:53:08
Site 007	opossum	2018-12-02 04:49:57	2018-12-02	04:49:57	4:49:57
Site 007	opossum	2018-12-03 20:31:57	2018-12-03	20:31:57	20:31:57
Site 007	opossum	2018-12-05 19:30:57	2018-12-05	19:30:57	19:30:57
Site 007	opossum	2018-12-13 04:36:49	2018-12-13	04:36:49	4:36:49
Site 007	opossum	2018-12-13 22:45:58	2018-12-13	22:45:58	22:45:58
Site 007	opossum	2018-12-15 01:26:57	2018-12-15	01:26:57	1:26:57
Site 007	opossum	2018-12-17 01:45:58	2018-12-17	01:45:58	1:45:58
Site 007	opossum	2018-12-17 01:51:22	2018-12-17	01:51:22	1:51:22
Site 007	opossum	2018-12-17 01:53:05	2018-12-17	01:53:05	1:53:05
Site 007	opossum	2018-12-17 01:59:57	2018-12-17	01:59:57	1:59:57
Site 007	opossum	2018-12-18 20:58:21	2018-12-18	20:58:21	20:58:21
Site 007	opossum	2018-12-19 19:11:48	2018-12-19	19:11:48	19:11:48
Site 007	opossum	2018-12-20 00:26:43	2018-12-20	00:26:43	0:26:43
Site 007	opossum	2018-12-21 00:01:45	2018-12-21	00:01:45	0:01:45
Site 007	opossum	2018-12-21 02:23:22	2018-12-21	02:23:22	2:23:22
Site 007	opossum	2018-12-21 04:21:06	2018-12-21	04:21:06	4:21:06
Site 007	opossum	2018-12-21 19:22:19	2018-12-21	19:22:19	19:22:19
Site 007	opossum	2018-12-24 03:54:35	2018-12-24	03:54:35	3:54:35
Site 007	opossum	2018-12-25 22:43:29	2018-12-25	22:43:29	22:43:29
Site 007	opossum	2018-12-26 00:55:15	2018-12-26	00:55:15	0:55:15
Site 007	opossum	2018-12-29 00:49:50	2018-12-29	00:49:50	0:49:50
Site 007	opossum	2018-12-30 21:06:24	2018-12-30	21:06:24	21:06:24
Site 007	opossum	2018-12-31 21:24:43	2018-12-31	21:24:43	21:24:43
Site 007	opossum	2019-01-03 04:21:43	2019-01-03	04:21:43	4:21:43
Site 007	opossum	2019-01-03 20:32:05	2019-01-03	20:32:05	20:32:05
Site 007	opossum	2019-01-09 04:19:20	2019-01-09	04:19:20	4:19:20
Site 007	opossum	2019-01-10 00:34:37	2019-01-10	00:34:37	0:34:37
Site 007	opossum	2019-01-10 22:55:10	2019-01-10	22:55:10	22:55:10
Site 007	opossum	2019-01-10 22:56:34	2019-01-10	22:56:34	22:56:34
Site 007	opossum	2019-01-11 01:03:05	2019-01-11	01:03:05	1:03:05
Site 007	opossum	2019-01-11 03:40:47	2019-01-11	03:40:47	3:40:47
Site 007	opossum	2019-01-11 05:46:07	2019-01-11	05:46:07	5:46:07
Site 007	opossum	2019-01-11 22:51:26	2019-01-11	22:51:26	22:51:26
Site 007	opossum	2019-01-11 22:52:35	2019-01-11	22:52:35	22:52:35
Site 007	opossum	2019-01-12 04:50:32	2019-01-12	04:50:32	4:50:32
Site 007	opossum	2019-01-13 04:52:15	2019-01-13	04:52:15	4:52:15
Site 007	opossum	2019-01-13 05:25:31	2019-01-13	05:25:31	5:25:31
Site 007	opossum	2019-01-16 02:47:08	2019-01-16	02:47:08	2:47:08
Site 007	opossum	2019-01-16 04:28:38	2019-01-16	04:28:38	4:28:38
Site 007	opossum	2019-01-16 20:05:08	2019-01-16	20:05:08	20:05:08
Site 007	opossum	2019-01-17 01:10:08	2019-01-17	01:10:08	1:10:08
Site 007	opossum	2019-01-17 01:34:49	2019-01-17	01:34:49	1:34:49
Site 007	opossum	2019-01-17 03:54:56	2019-01-17	03:54:56	3:54:56
Site 007	opossum	2019-01-17 22:48:44	2019-01-17	22:48:44	22:48:44
Site 007	opossum	2019-01-19 05:39:44	2019-01-19	05:39:44	5:39:44
Site 007	opossum	2019-01-20 03:55:36	2019-01-20	03:55:36	3:55:36
Site 007	opossum	2019-01-20 23:57:14	2019-01-20	23:57:14	23:57:14
Site 007	opossum	2019-01-21 02:04:33	2019-01-21	02:04:33	2:04:33
Site 007	opossum	2019-01-25 21:51:05	2019-01-25	21:51:05	21:51:05
Site 007	opossum	2019-01-26 00:26:42	2019-01-26	00:26:42	0:26:42
Site 007	raccoon	2018-04-20 21:26:11	2018-04-20	21:26:11	21:26:11
Site 007	raccoon	2018-04-21 21:16:29	2018-04-21	21:16:29	21:16:29
Site 007	raccoon	2018-04-23 21:28:15	2018-04-23	21:28:15	21:28:15
Site 007	raccoon	2018-04-25 22:03:12	2018-04-25	22:03:12	22:03:12
Site 007	raccoon	2018-04-25 23:33:23	2018-04-25	23:33:23	23:33:23
Site 007	raccoon	2018-04-29 22:52:51	2018-04-29	22:52:51	22:52:51
Site 007	raccoon	2018-05-01 05:40:29	2018-05-01	05:40:29	5:40:29
Site 007	raccoon	2018-05-01 05:56:03	2018-05-01	05:56:03	5:56:03
Site 007	raccoon	2018-05-01 05:57:05	2018-05-01	05:57:05	5:57:05
Site 007	raccoon	2018-05-01 22:09:41	2018-05-01	22:09:41	22:09:41
Site 007	raccoon	2018-05-06 21:59:57	2018-05-06	21:59:57	21:59:57
Site 007	raccoon	2018-05-07 23:09:37	2018-05-07	23:09:37	23:09:37
Site 007	raccoon	2018-05-14 05:14:54	2018-05-14	05:14:54	5:14:54
Site 007	raccoon	2018-05-17 00:31:39	2018-05-17	00:31:39	0:31:39
Site 007	raccoon	2018-05-19 22:38:47	2018-05-19	22:38:47	22:38:47
Site 007	raccoon	2018-05-25 23:20:20	2018-05-25	23:20:20	23:20:20
Site 007	raccoon	2018-05-25 23:42:45	2018-05-25	23:42:45	23:42:45
Site 007	raccoon	2018-06-16 02:33:07	2018-06-16	02:33:07	2:33:07
Site 007	raccoon	2018-06-17 05:08:08	2018-06-17	05:08:08	5:08:08
Site 007	raccoon	2018-06-17 07:49:27	2018-06-17	07:49:27	7:49:27
Site 007	raccoon	2018-06-17 21:31:32	2018-06-17	21:31:32	21:31:32
Site 007	raccoon	2018-06-18 02:54:36	2018-06-18	02:54:36	2:54:36
Site 007	raccoon	2018-06-18 03:20:05	2018-06-18	03:20:05	3:20:05
Site 007	raccoon	2018-06-18 03:21:25	2018-06-18	03:21:25	3:21:25
Site 007	raccoon	2018-06-19 20:02:15	2018-06-19	20:02:15	20:02:15
Site 007	raccoon	2018-06-20 17:26:51	2018-06-20	17:26:51	17:26:51
Site 007	raccoon	2018-06-21 04:56:44	2018-06-21	04:56:44	4:56:44
Site 007	raccoon	2018-06-21 19:03:56	2018-06-21	19:03:56	19:03:56
Site 007	raccoon	2018-06-21 20:10:26	2018-06-21	20:10:26	20:10:26
Site 007	raccoon	2018-06-21 20:32:02	2018-06-21	20:32:02	20:32:02
Site 007	raccoon	2018-06-21 21:11:37	2018-06-21	21:11:37	21:11:37
Site 007	raccoon	2018-06-24 18:58:08	2018-06-24	18:58:08	18:58:08
Site 007	raccoon	2018-06-24 19:51:25	2018-06-24	19:51:25	19:51:25
Site 007	raccoon	2018-06-24 21:20:39	2018-06-24	21:20:39	21:20:39
Site 007	raccoon	2018-06-25 02:00:21	2018-06-25	02:00:21	2:00:21
Site 007	raccoon	2018-06-25 19:03:24	2018-06-25	19:03:24	19:03:24
Site 007	raccoon	2018-06-26 20:00:30	2018-06-26	20:00:30	20:00:30
Site 007	raccoon	2018-06-29 20:02:52	2018-06-29	20:02:52	20:02:52
Site 007	raccoon	2018-06-30 18:37:21	2018-06-30	18:37:21	18:37:21
Site 007	raccoon	2018-06-30 21:02:16	2018-06-30	21:02:16	21:02:16
Site 007	raccoon	2018-07-03 19:33:38	2018-07-03	19:33:38	19:33:38
Site 007	raccoon	2018-07-04 05:00:34	2018-07-04	05:00:34	5:00:34
Site 007	raccoon	2018-07-05 01:28:28	2018-07-05	01:28:28	1:28:28
Site 007	raccoon	2018-07-08 19:28:17	2018-07-08	19:28:17	19:28:17
Site 007	raccoon	2018-07-09 21:29:27	2018-07-09	21:29:27	21:29:27
Site 007	raccoon	2018-07-10 23:19:20	2018-07-10	23:19:20	23:19:20
Site 007	raccoon	2018-07-12 05:07:30	2018-07-12	05:07:30	5:07:30
Site 007	raccoon	2018-07-12 23:58:52	2018-07-12	23:58:52	23:58:52
Site 007	raccoon	2018-07-15 02:43:46	2018-07-15	02:43:46	2:43:46
Site 007	raccoon	2018-07-15 03:56:08	2018-07-15	03:56:08	3:56:08
Site 007	raccoon	2018-07-16 02:57:11	2018-07-16	02:57:11	2:57:11
Site 007	raccoon	2018-07-16 23:17:30	2018-07-16	23:17:30	23:17:30
Site 007	raccoon	2018-07-17 00:10:39	2018-07-17	00:10:39	0:10:39
Site 007	raccoon	2018-07-17 00:59:37	2018-07-17	00:59:37	0:59:37
Site 007	raccoon	2018-07-17 05:38:32	2018-07-17	05:38:32	5:38:32
Site 007	raccoon	2018-07-17 22:30:58	2018-07-17	22:30:58	22:30:58
Site 007	raccoon	2018-07-18 01:39:08	2018-07-18	01:39:08	1:39:08
Site 007	raccoon	2018-07-18 02:22:07	2018-07-18	02:22:07	2:22:07
Site 007	raccoon	2018-07-18 18:31:19	2018-07-18	18:31:19	18:31:19
Site 007	raccoon	2018-07-18 23:09:02	2018-07-18	23:09:02	23:09:02
Site 007	raccoon	2018-07-19 23:07:06	2018-07-19	23:07:06	23:07:06
Site 007	raccoon	2018-07-20 01:10:08	2018-07-20	01:10:08	1:10:08
Site 007	raccoon	2018-07-20 02:09:05	2018-07-20	02:09:05	2:09:05
Site 007	raccoon	2018-07-20 02:53:03	2018-07-20	02:53:03	2:53:03
Site 007	raccoon	2018-07-20 03:46:00	2018-07-20	03:46:00	3:46:00
Site 007	raccoon	2018-07-20 14:44:02	2018-07-20	14:44:02	14:44:02
Site 007	raccoon	2018-07-20 14:49:22	2018-07-20	14:49:22	14:49:22
Site 007	raccoon	2018-07-21 01:29:19	2018-07-21	01:29:19	1:29:19
Site 007	raccoon	2018-07-21 02:48:07	2018-07-21	02:48:07	2:48:07
Site 007	raccoon	2018-07-21 16:51:35	2018-07-21	16:51:35	16:51:35
Site 007	raccoon	2018-07-21 21:10:21	2018-07-21	21:10:21	21:10:21
Site 007	raccoon	2018-07-22 21:37:47	2018-07-22	21:37:47	21:37:47
Site 007	raccoon	2018-07-23 05:03:03	2018-07-23	05:03:03	5:03:03
Site 007	raccoon	2018-07-23 05:18:15	2018-07-23	05:18:15	5:18:15
Site 007	raccoon	2018-07-24 03:52:21	2018-07-24	03:52:21	3:52:21
Site 007	raccoon	2018-07-24 13:12:22	2018-07-24	13:12:22	13:12:22
Site 007	raccoon	2018-07-24 13:33:29	2018-07-24	13:33:29	13:33:29
Site 007	raccoon	2018-07-25 04:12:27	2018-07-25	04:12:27	4:12:27
Site 007	raccoon	2018-07-26 05:21:03	2018-07-26	05:21:03	5:21:03
Site 007	raccoon	2018-07-26 06:09:50	2018-07-26	06:09:50	6:09:50
Site 007	raccoon	2018-07-26 22:09:24	2018-07-26	22:09:24	22:09:24
Site 007	raccoon	2018-07-27 02:26:58	2018-07-27	02:26:58	2:26:58
Site 007	raccoon	2018-07-28 02:29:25	2018-07-28	02:29:25	2:29:25
Site 007	raccoon	2018-07-28 05:07:18	2018-07-28	05:07:18	5:07:18
Site 007	raccoon	2018-07-29 08:29:19	2018-07-29	08:29:19	8:29:19
Site 007	raccoon	2018-07-30 03:55:51	2018-07-30	03:55:51	3:55:51
Site 007	raccoon	2018-07-30 22:12:34	2018-07-30	22:12:34	22:12:34
Site 007	raccoon	2018-07-31 20:08:52	2018-07-31	20:08:52	20:08:52
Site 007	raccoon	2018-08-01 12:31:08	2018-08-01	12:31:08	12:31:08
Site 007	raccoon	2018-08-01 21:31:53	2018-08-01	21:31:53	21:31:53
Site 007	raccoon	2018-08-02 04:16:26	2018-08-02	04:16:26	4:16:26
Site 007	raccoon	2018-08-02 19:56:41	2018-08-02	19:56:41	19:56:41
Site 007	raccoon	2018-08-03 21:44:25	2018-08-03	21:44:25	21:44:25
Site 007	raccoon	2018-08-04 21:53:06	2018-08-04	21:53:06	21:53:06
Site 007	raccoon	2018-08-05 04:21:50	2018-08-05	04:21:50	4:21:50
Site 007	raccoon	2018-08-06 22:37:23	2018-08-06	22:37:23	22:37:23
Site 007	raccoon	2018-08-06 23:13:01	2018-08-06	23:13:01	23:13:01
Site 007	raccoon	2018-08-06 23:15:45	2018-08-06	23:15:45	23:15:45
Site 007	raccoon	2018-08-08 03:06:42	2018-08-08	03:06:42	3:06:42
Site 007	raccoon	2018-08-09 00:01:29	2018-08-09	00:01:29	0:01:29
Site 007	raccoon	2018-08-09 00:04:32	2018-08-09	00:04:32	0:04:32
Site 007	raccoon	2018-08-09 00:28:38	2018-08-09	00:28:38	0:28:38
Site 007	raccoon	2018-08-09 02:25:32	2018-08-09	02:25:32	2:25:32
Site 007	raccoon	2018-08-11 02:08:07	2018-08-11	02:08:07	2:08:07
Site 007	raccoon	2018-08-11 02:09:13	2018-08-11	02:09:13	2:09:13
Site 007	raccoon	2018-08-11 02:29:18	2018-08-11	02:29:18	2:29:18
Site 007	raccoon	2018-08-11 02:32:25	2018-08-11	02:32:25	2:32:25
Site 007	raccoon	2018-08-11 03:05:54	2018-08-11	03:05:54	3:05:54
Site 007	raccoon	2018-08-11 06:13:49	2018-08-11	06:13:49	6:13:49
Site 007	raccoon	2018-08-12 04:45:50	2018-08-12	04:45:50	4:45:50
Site 007	raccoon	2018-08-14 04:34:31	2018-08-14	04:34:31	4:34:31
Site 007	raccoon	2018-08-16 02:44:06	2018-08-16	02:44:06	2:44:06
Site 007	raccoon	2018-08-18 01:41:16	2018-08-18	01:41:16	1:41:16
Site 007	raccoon	2018-08-18 02:03:56	2018-08-18	02:03:56	2:03:56
Site 007	raccoon	2018-08-19 00:12:14	2018-08-19	00:12:14	0:12:14
Site 007	raccoon	2018-08-20 01:22:43	2018-08-20	01:22:43	1:22:43
Site 007	raccoon	2018-08-20 01:24:21	2018-08-20	01:24:21	1:24:21
Site 007	raccoon	2018-08-24 00:55:10	2018-08-24	00:55:10	0:55:10
Site 007	raccoon	2018-08-24 00:58:03	2018-08-24	00:58:03	0:58:03
Site 007	raccoon	2018-08-24 21:58:28	2018-08-24	21:58:28	21:58:28
Site 007	raccoon	2018-08-31 07:10:21	2018-08-31	07:10:21	7:10:21
Site 007	raccoon	2018-09-07 20:07:35	2018-09-07	20:07:35	20:07:35
Site 007	raccoon	2018-09-10 01:28:47	2018-09-10	01:28:47	1:28:47
Site 007	raccoon	2018-09-10 04:32:28	2018-09-10	04:32:28	4:32:28
Site 007	raccoon	2018-09-15 05:51:24	2018-09-15	05:51:24	5:51:24
Site 007	raccoon	2018-09-21 05:51:14	2018-09-21	05:51:14	5:51:14
Site 007	raccoon	2018-09-26 23:39:16	2018-09-26	23:39:16	23:39:16
Site 007	raccoon	2018-09-27 00:12:46	2018-09-27	00:12:46	0:12:46
Site 007	raccoon	2018-09-28 03:47:58	2018-09-28	03:47:58	3:47:58
Site 007	raccoon	2018-09-28 06:54:49	2018-09-28	06:54:49	6:54:49
Site 007	raccoon	2018-09-29 20:23:12	2018-09-29	20:23:12	20:23:12
Site 007	raccoon	2018-10-01 03:39:27	2018-10-01	03:39:27	3:39:27
Site 007	raccoon	2018-10-05 22:09:59	2018-10-05	22:09:59	22:09:59
Site 007	raccoon	2018-10-06 01:56:28	2018-10-06	01:56:28	1:56:28
Site 007	raccoon	2018-10-07 01:23:01	2018-10-07	01:23:01	1:23:01
Site 007	raccoon	2018-10-07 04:42:47	2018-10-07	04:42:47	4:42:47
Site 007	raccoon	2018-10-07 21:24:42	2018-10-07	21:24:42	21:24:42
Site 007	raccoon	2018-10-07 21:25:58	2018-10-07	21:25:58	21:25:58
Site 007	raccoon	2018-10-10 19:56:34	2018-10-10	19:56:34	19:56:34
Site 007	raccoon	2018-10-10 20:03:12	2018-10-10	20:03:12	20:03:12
Site 007	raccoon	2018-10-10 21:09:56	2018-10-10	21:09:56	21:09:56
Site 007	raccoon	2018-10-10 21:29:08	2018-10-10	21:29:08	21:29:08
Site 007	raccoon	2018-10-11 21:05:10	2018-10-11	21:05:10	21:05:10
Site 007	raccoon	2018-10-11 21:06:10	2018-10-11	21:06:10	21:06:10
Site 007	raccoon	2018-10-12 06:14:08	2018-10-12	06:14:08	6:14:08
Site 007	raccoon	2018-10-16 04:25:31	2018-10-16	04:25:31	4:25:31
Site 007	raccoon	2018-10-16 20:26:36	2018-10-16	20:26:36	20:26:36
Site 007	raccoon	2018-10-17 19:55:22	2018-10-17	19:55:22	19:55:22
Site 007	raccoon	2018-10-19 03:24:31	2018-10-19	03:24:31	3:24:31
Site 007	raccoon	2018-10-19 03:34:53	2018-10-19	03:34:53	3:34:53
Site 007	raccoon	2018-10-19 03:48:37	2018-10-19	03:48:37	3:48:37
Site 007	raccoon	2018-10-19 03:49:59	2018-10-19	03:49:59	3:49:59
Site 007	raccoon	2018-10-19 20:01:32	2018-10-19	20:01:32	20:01:32
Site 007	raccoon	2018-10-19 20:18:33	2018-10-19	20:18:33	20:18:33
Site 007	raccoon	2018-10-19 20:48:28	2018-10-19	20:48:28	20:48:28
Site 007	raccoon	2018-10-19 20:49:52	2018-10-19	20:49:52	20:49:52
Site 007	raccoon	2018-10-19 22:01:03	2018-10-19	22:01:03	22:01:03
Site 007	raccoon	2018-10-19 22:15:35	2018-10-19	22:15:35	22:15:35
Site 007	raccoon	2018-10-19 22:17:55	2018-10-19	22:17:55	22:17:55
Site 007	raccoon	2018-10-19 22:20:50	2018-10-19	22:20:50	22:20:50
Site 007	raccoon	2018-10-19 22:57:17	2018-10-19	22:57:17	22:57:17
Site 007	raccoon	2018-10-20 19:53:07	2018-10-20	19:53:07	19:53:07
Site 007	raccoon	2018-10-20 19:54:15	2018-10-20	19:54:15	19:54:15
Site 007	raccoon	2018-10-20 19:59:27	2018-10-20	19:59:27	19:59:27
Site 007	raccoon	2018-10-22 20:29:24	2018-10-22	20:29:24	20:29:24
Site 007	raccoon	2018-10-22 20:44:24	2018-10-22	20:44:24	20:44:24
Site 007	raccoon	2018-10-22 20:45:27	2018-10-22	20:45:27	20:45:27
Site 007	raccoon	2018-10-22 20:46:58	2018-10-22	20:46:58	20:46:58
Site 007	raccoon	2018-10-22 20:50:02	2018-10-22	20:50:02	20:50:02
Site 007	raccoon	2018-10-22 20:51:04	2018-10-22	20:51:04	20:51:04
Site 007	raccoon	2018-10-23 04:57:55	2018-10-23	04:57:55	4:57:55
Site 007	raccoon	2018-10-23 05:25:35	2018-10-23	05:25:35	5:25:35
Site 007	raccoon	2018-10-23 05:26:50	2018-10-23	05:26:50	5:26:50
Site 007	raccoon	2018-10-23 05:36:35	2018-10-23	05:36:35	5:36:35
Site 007	raccoon	2018-10-23 05:37:37	2018-10-23	05:37:37	5:37:37
Site 007	raccoon	2018-10-23 06:04:11	2018-10-23	06:04:11	6:04:11
Site 007	raccoon	2018-10-23 06:09:19	2018-10-23	06:09:19	6:09:19
Site 007	raccoon	2018-10-23 06:16:26	2018-10-23	06:16:26	6:16:26
Site 007	raccoon	2018-10-23 06:33:30	2018-10-23	06:33:30	6:33:30
Site 007	raccoon	2018-10-24 00:45:34	2018-10-24	00:45:34	0:45:34
Site 007	raccoon	2018-10-25 05:01:37	2018-10-25	05:01:37	5:01:37
Site 007	raccoon	2018-10-25 05:02:52	2018-10-25	05:02:52	5:02:52
Site 007	raccoon	2018-10-25 06:05:57	2018-10-25	06:05:57	6:05:57
Site 007	raccoon	2018-10-25 19:44:06	2018-10-25	19:44:06	19:44:06
Site 007	raccoon	2018-10-25 22:57:19	2018-10-25	22:57:19	22:57:19
Site 007	raccoon	2018-10-26 22:44:08	2018-10-26	22:44:08	22:44:08
Site 007	raccoon	2018-10-27 19:55:34	2018-10-27	19:55:34	19:55:34
Site 007	raccoon	2018-10-27 20:03:19	2018-10-27	20:03:19	20:03:19
Site 007	raccoon	2018-10-29 05:44:56	2018-10-29	05:44:56	5:44:56
Site 007	raccoon	2018-10-29 20:38:52	2018-10-29	20:38:52	20:38:52
Site 007	raccoon	2018-11-01 01:00:37	2018-11-01	01:00:37	1:00:37
Site 007	raccoon	2018-11-01 20:50:41	2018-11-01	20:50:41	20:50:41
Site 007	raccoon	2018-11-02 19:05:16	2018-11-02	19:05:16	19:05:16
Site 007	raccoon	2018-11-03 19:01:29	2018-11-03	19:01:29	19:01:29
Site 007	raccoon	2018-11-03 19:02:39	2018-11-03	19:02:39	19:02:39
Site 007	raccoon	2018-11-04 01:16:37	2018-11-04	01:16:37	1:16:37
Site 007	raccoon	2018-11-04 03:50:13	2018-11-04	03:50:13	3:50:13
Site 007	raccoon	2018-11-06 21:37:58	2018-11-06	21:37:58	21:37:58
Site 007	raccoon	2018-11-15 03:36:46	2018-11-15	03:36:46	3:36:46
Site 007	raccoon	2018-11-16 05:18:00	2018-11-16	05:18:00	5:18:00
Site 007	raccoon	2018-11-16 05:25:55	2018-11-16	05:25:55	5:25:55
Site 007	raccoon	2018-11-16 05:33:22	2018-11-16	05:33:22	5:33:22
Site 007	raccoon	2018-11-16 05:35:22	2018-11-16	05:35:22	5:35:22
Site 007	raccoon	2018-11-16 05:37:59	2018-11-16	05:37:59	5:37:59
Site 007	raccoon	2018-11-22 21:32:38	2018-11-22	21:32:38	21:32:38
Site 007	raccoon	2018-11-22 21:33:41	2018-11-22	21:33:41	21:33:41
Site 007	raccoon	2018-11-30 20:24:39	2018-11-30	20:24:39	20:24:39
Site 007	raccoon	2018-12-01 05:29:42	2018-12-01	05:29:42	5:29:42
Site 007	raccoon	2018-12-02 20:34:39	2018-12-02	20:34:39	20:34:39
Site 007	raccoon	2018-12-04 01:55:46	2018-12-04	01:55:46	1:55:46
Site 007	raccoon	2018-12-04 01:57:06	2018-12-04	01:57:06	1:57:06
Site 007	raccoon	2018-12-05 23:14:50	2018-12-05	23:14:50	23:14:50
Site 007	raccoon	2018-12-08 20:08:04	2018-12-08	20:08:04	20:08:04
Site 007	raccoon	2018-12-11 23:16:53	2018-12-11	23:16:53	23:16:53
Site 007	raccoon	2018-12-11 23:29:39	2018-12-11	23:29:39	23:29:39
Site 007	raccoon	2018-12-18 22:47:09	2018-12-18	22:47:09	22:47:09
Site 007	raccoon	2018-12-19 22:17:46	2018-12-19	22:17:46	22:17:46
Site 007	raccoon	2018-12-20 04:06:10	2018-12-20	04:06:10	4:06:10
Site 007	raccoon	2018-12-24 21:08:44	2018-12-24	21:08:44	21:08:44
Site 007	raccoon	2018-12-26 03:03:55	2018-12-26	03:03:55	3:03:55
Site 007	raccoon	2018-12-29 04:11:01	2018-12-29	04:11:01	4:11:01
Site 007	raccoon	2018-12-29 04:12:23	2018-12-29	04:12:23	4:12:23
Site 007	raccoon	2019-01-04 07:48:42	2019-01-04	07:48:42	7:48:42
Site 007	raccoon	2019-01-06 03:41:35	2019-01-06	03:41:35	3:41:35
Site 007	raccoon	2019-01-06 03:43:11	2019-01-06	03:43:11	3:43:11
Site 007	raccoon	2019-01-08 06:11:20	2019-01-08	06:11:20	6:11:20
Site 007	raccoon	2019-01-17 23:19:31	2019-01-17	23:19:31	23:19:31
Site 007	raccoon	2019-01-18 03:47:12	2019-01-18	03:47:12	3:47:12
Site 007	raccoon	2019-01-20 07:00:26	2019-01-20	07:00:26	7:00:26
Site 007	raccoon	2019-01-20 20:15:12	2019-01-20	20:15:12	20:15:12
Site 007	raccoon	2019-01-21 00:10:16	2019-01-21	00:10:16	0:10:16
Site 007	raccoon	2019-01-21 00:16:37	2019-01-21	00:16:37	0:16:37
Site 007	raccoon	2019-01-21 00:24:48	2019-01-21	00:24:48	0:24:48
Site 007	raccoon	2019-01-21 08:29:50	2019-01-21	08:29:50	8:29:50
Site 007	raccoon	2019-01-22 05:03:06	2019-01-22	05:03:06	5:03:06
Site 007	raccoon	2019-01-22 08:47:51	2019-01-22	08:47:51	8:47:51
Site 007	raccoon	2019-01-22 22:31:27	2019-01-22	22:31:27	22:31:27
Site 007	raccoon	2019-01-23 00:55:05	2019-01-23	00:55:05	0:55:05
Site 007	raccoon	2019-01-23 22:15:30	2019-01-23	22:15:30	22:15:30
Site 007	striped skunk	2018-04-23 22:51:11	2018-04-23	22:51:11	22:51:11
Site 007	striped skunk	2018-04-24 21:12:17	2018-04-24	21:12:17	21:12:17
Site 007	striped skunk	2018-05-21 21:50:03	2018-05-21	21:50:03	21:50:03
Site 007	striped skunk	2018-05-23 22:22:23	2018-05-23	22:22:23	22:22:23
Site 007	striped skunk	2018-05-25 21:32:30	2018-05-25	21:32:30	21:32:30
Site 007	striped skunk	2018-05-26 04:03:13	2018-05-26	04:03:13	4:03:13
Site 007	striped skunk	2018-05-29 05:08:03	2018-05-29	05:08:03	5:08:03
Site 007	striped skunk	2018-05-31 21:27:46	2018-05-31	21:27:46	21:27:46
Site 007	striped skunk	2018-06-03 01:33:09	2018-06-03	01:33:09	1:33:09
Site 007	striped skunk	2018-06-03 01:40:51	2018-06-03	01:40:51	1:40:51
Site 007	striped skunk	2018-06-03 22:04:31	2018-06-03	22:04:31	22:04:31
Site 007	striped skunk	2018-06-06 03:43:13	2018-06-06	03:43:13	3:43:13
Site 007	striped skunk	2018-06-08 04:47:51	2018-06-08	04:47:51	4:47:51
Site 007	striped skunk	2018-06-11 04:57:13	2018-06-11	04:57:13	4:57:13
Site 007	striped skunk	2018-06-13 05:00:04	2018-06-13	05:00:04	5:00:04
Site 007	striped skunk	2018-06-13 22:49:50	2018-06-13	22:49:50	22:49:50
Site 007	striped skunk	2018-06-25 03:43:37	2018-06-25	03:43:37	3:43:37
Site 007	striped skunk	2018-06-26 03:28:09	2018-06-26	03:28:09	3:28:09
Site 007	striped skunk	2018-06-28 04:28:26	2018-06-28	04:28:26	4:28:26
Site 007	striped skunk	2018-07-01 21:43:21	2018-07-01	21:43:21	21:43:21
Site 007	striped skunk	2018-07-11 02:24:38	2018-07-11	02:24:38	2:24:38
Site 007	striped skunk	2018-07-12 04:52:38	2018-07-12	04:52:38	4:52:38
Site 007	striped skunk	2018-07-15 02:41:56	2018-07-15	02:41:56	2:41:56
Site 007	striped skunk	2018-07-15 23:53:39	2018-07-15	23:53:39	23:53:39
Site 007	striped skunk	2018-07-22 00:16:49	2018-07-22	00:16:49	0:16:49
Site 007	striped skunk	2018-07-26 04:26:12	2018-07-26	04:26:12	4:26:12
Site 007	striped skunk	2018-07-30 05:10:26	2018-07-30	05:10:26	5:10:26
Site 007	striped skunk	2018-08-04 04:58:02	2018-08-04	04:58:02	4:58:02
Site 007	striped skunk	2018-08-13 04:29:07	2018-08-13	04:29:07	4:29:07
Site 007	striped skunk	2018-08-14 20:43:50	2018-08-14	20:43:50	20:43:50
Site 007	striped skunk	2018-08-16 05:22:15	2018-08-16	05:22:15	5:22:15
Site 007	striped skunk	2018-08-16 19:56:38	2018-08-16	19:56:38	19:56:38
Site 007	striped skunk	2018-08-20 04:24:36	2018-08-20	04:24:36	4:24:36
Site 007	striped skunk	2018-08-21 20:50:01	2018-08-21	20:50:01	20:50:01
Site 007	striped skunk	2018-08-21 23:47:56	2018-08-21	23:47:56	23:47:56
Site 007	striped skunk	2018-08-26 02:11:17	2018-08-26	02:11:17	2:11:17
Site 007	striped skunk	2018-08-26 03:41:50	2018-08-26	03:41:50	3:41:50
Site 007	striped skunk	2018-08-26 20:20:20	2018-08-26	20:20:20	20:20:20
Site 007	striped skunk	2018-08-27 21:00:54	2018-08-27	21:00:54	21:00:54
Site 007	striped skunk	2018-08-28 23:23:17	2018-08-28	23:23:17	23:23:17
Site 007	striped skunk	2018-08-28 23:35:37	2018-08-28	23:35:37	23:35:37
Site 007	striped skunk	2018-08-31 03:17:03	2018-08-31	03:17:03	3:17:03
Site 007	striped skunk	2018-09-01 04:44:32	2018-09-01	04:44:32	4:44:32
Site 007	striped skunk	2018-09-02 02:45:17	2018-09-02	02:45:17	2:45:17
Site 007	striped skunk	2018-09-02 20:09:13	2018-09-02	20:09:13	20:09:13
Site 007	striped skunk	2018-09-05 03:11:52	2018-09-05	03:11:52	3:11:52
Site 007	striped skunk	2018-09-06 02:19:26	2018-09-06	02:19:26	2:19:26
Site 007	striped skunk	2018-09-06 04:24:09	2018-09-06	04:24:09	4:24:09
Site 007	striped skunk	2018-09-06 04:27:02	2018-09-06	04:27:02	4:27:02
Site 007	striped skunk	2018-09-06 23:58:24	2018-09-06	23:58:24	23:58:24
Site 007	striped skunk	2018-09-07 05:53:13	2018-09-07	05:53:13	5:53:13
Site 007	striped skunk	2018-09-08 00:26:00	2018-09-08	00:26:00	0:26:00
Site 007	striped skunk	2018-09-09 02:26:06	2018-09-09	02:26:06	2:26:06
Site 007	striped skunk	2018-09-09 19:56:26	2018-09-09	19:56:26	19:56:26
Site 007	striped skunk	2018-09-09 23:38:35	2018-09-09	23:38:35	23:38:35
Site 007	striped skunk	2018-09-10 22:03:43	2018-09-10	22:03:43	22:03:43
Site 007	striped skunk	2018-09-11 04:10:35	2018-09-11	04:10:35	4:10:35
Site 007	striped skunk	2018-09-11 19:52:43	2018-09-11	19:52:43	19:52:43
Site 007	striped skunk	2018-09-11 22:03:45	2018-09-11	22:03:45	22:03:45
Site 007	striped skunk	2018-09-12 04:43:01	2018-09-12	04:43:01	4:43:01
Site 007	striped skunk	2018-09-15 19:34:34	2018-09-15	19:34:34	19:34:34
Site 007	striped skunk	2018-09-15 19:35:34	2018-09-15	19:35:34	19:35:34
Site 007	striped skunk	2018-09-15 19:47:28	2018-09-15	19:47:28	19:47:28
Site 007	striped skunk	2018-09-17 06:11:16	2018-09-17	06:11:16	6:11:16
Site 007	striped skunk	2018-09-20 03:22:29	2018-09-20	03:22:29	3:22:29
Site 007	striped skunk	2018-09-21 00:32:26	2018-09-21	00:32:26	0:32:26
Site 007	striped skunk	2018-09-21 01:12:13	2018-09-21	01:12:13	1:12:13
Site 007	striped skunk	2018-09-22 19:33:34	2018-09-22	19:33:34	19:33:34
Site 007	striped skunk	2018-09-23 06:09:31	2018-09-23	06:09:31	6:09:31
Site 007	striped skunk	2018-09-24 05:05:33	2018-09-24	05:05:33	5:05:33
Site 007	striped skunk	2018-09-25 06:18:51	2018-09-25	06:18:51	6:18:51
Site 007	striped skunk	2018-09-25 19:26:10	2018-09-25	19:26:10	19:26:10
Site 007	striped skunk	2018-09-25 19:28:57	2018-09-25	19:28:57	19:28:57
Site 007	striped skunk	2018-09-26 04:06:09	2018-09-26	04:06:09	4:06:09
Site 007	striped skunk	2018-09-27 05:35:42	2018-09-27	05:35:42	5:35:42
Site 007	striped skunk	2018-09-30 06:21:56	2018-09-30	06:21:56	6:21:56
Site 007	striped skunk	2018-09-30 19:10:46	2018-09-30	19:10:46	19:10:46
Site 007	striped skunk	2018-09-30 19:46:37	2018-09-30	19:46:37	19:46:37
Site 007	striped skunk	2018-10-01 01:02:05	2018-10-01	01:02:05	1:02:05
Site 007	striped skunk	2018-10-01 06:07:08	2018-10-01	06:07:08	6:07:08
Site 007	striped skunk	2018-10-03 00:30:01	2018-10-03	00:30:01	0:30:01
Site 007	striped skunk	2018-10-04 05:49:11	2018-10-04	05:49:11	5:49:11
Site 007	striped skunk	2018-10-07 18:58:43	2018-10-07	18:58:43	18:58:43
Site 007	striped skunk	2018-10-09 20:08:39	2018-10-09	20:08:39	20:08:39
Site 007	striped skunk	2018-10-11 04:48:57	2018-10-11	04:48:57	4:48:57
Site 007	striped skunk	2018-10-11 05:15:09	2018-10-11	05:15:09	5:15:09
Site 007	striped skunk	2018-10-11 05:16:31	2018-10-11	05:16:31	5:16:31
Site 007	striped skunk	2018-10-11 06:02:33	2018-10-11	06:02:33	6:02:33
Site 007	striped skunk	2018-10-11 19:05:44	2018-10-11	19:05:44	19:05:44
Site 007	striped skunk	2018-10-11 22:23:47	2018-10-11	22:23:47	22:23:47
Site 007	striped skunk	2018-10-12 05:42:08	2018-10-12	05:42:08	5:42:08
Site 007	striped skunk	2018-10-12 19:39:06	2018-10-12	19:39:06	19:39:06
Site 007	striped skunk	2018-10-14 02:35:46	2018-10-14	02:35:46	2:35:46
Site 007	striped skunk	2018-10-14 05:04:06	2018-10-14	05:04:06	5:04:06
Site 007	striped skunk	2018-10-14 06:04:55	2018-10-14	06:04:55	6:04:55
Site 007	striped skunk	2018-10-15 03:09:01	2018-10-15	03:09:01	3:09:01
Site 007	striped skunk	2018-10-15 05:23:30	2018-10-15	05:23:30	5:23:30
Site 007	striped skunk	2018-10-15 19:51:34	2018-10-15	19:51:34	19:51:34
Site 007	striped skunk	2018-10-16 01:41:17	2018-10-16	01:41:17	1:41:17
Site 007	striped skunk	2018-10-17 01:33:18	2018-10-17	01:33:18	1:33:18
Site 007	striped skunk	2018-10-17 23:47:58	2018-10-17	23:47:58	23:47:58
Site 007	striped skunk	2018-10-18 02:54:06	2018-10-18	02:54:06	2:54:06
Site 007	striped skunk	2018-10-18 02:55:07	2018-10-18	02:55:07	2:55:07
Site 007	striped skunk	2018-10-18 02:56:08	2018-10-18	02:56:08	2:56:08
Site 007	striped skunk	2018-10-19 05:55:45	2018-10-19	05:55:45	5:55:45
Site 007	striped skunk	2018-10-19 21:06:26	2018-10-19	21:06:26	21:06:26
Site 007	striped skunk	2018-10-19 21:59:30	2018-10-19	21:59:30	21:59:30
Site 007	striped skunk	2018-10-23 02:06:27	2018-10-23	02:06:27	2:06:27
Site 007	striped skunk	2018-10-24 21:01:38	2018-10-24	21:01:38	21:01:38
Site 007	striped skunk	2018-10-31 22:10:30	2018-10-31	22:10:30	22:10:30
Site 007	striped skunk	2018-11-02 04:40:41	2018-11-02	04:40:41	4:40:41
Site 007	striped skunk	2018-11-04 05:31:57	2018-11-04	05:31:57	5:31:57
Site 007	striped skunk	2018-11-10 00:13:14	2018-11-10	00:13:14	0:13:14
Site 007	striped skunk	2018-11-13 02:23:30	2018-11-13	02:23:30	2:23:30
Site 007	striped skunk	2018-11-14 20:53:14	2018-11-14	20:53:14	20:53:14
Site 007	striped skunk	2018-11-19 05:39:29	2018-11-19	05:39:29	5:39:29
Site 007	striped skunk	2018-11-26 17:58:58	2018-11-26	17:58:58	17:58:58
Site 007	striped skunk	2018-11-28 23:02:30	2018-11-28	23:02:30	23:02:30
Site 007	striped skunk	2018-11-29 07:31:11	2018-11-29	07:31:11	7:31:11
Site 007	striped skunk	2018-12-05 00:34:05	2018-12-05	00:34:05	0:34:05
Site 007	striped skunk	2018-12-10 22:39:57	2018-12-10	22:39:57	22:39:57
Site 007	striped skunk	2018-12-12 03:41:07	2018-12-12	03:41:07	3:41:07
Site 007	striped skunk	2018-12-14 00:18:57	2018-12-14	00:18:57	0:18:57
Site 007	striped skunk	2018-12-14 04:48:30	2018-12-14	04:48:30	4:48:30
Site 007	striped skunk	2018-12-16 00:48:55	2018-12-16	00:48:55	0:48:55
Site 007	striped skunk	2018-12-18 03:42:45	2018-12-18	03:42:45	3:42:45
Site 007	striped skunk	2018-12-19 00:40:57	2018-12-19	00:40:57	0:40:57
Site 007	striped skunk	2018-12-19 02:56:18	2018-12-19	02:56:18	2:56:18
Site 007	striped skunk	2018-12-26 01:53:36	2018-12-26	01:53:36	1:53:36
Site 007	striped skunk	2018-12-29 21:09:22	2018-12-29	21:09:22	21:09:22
Site 007	striped skunk	2018-12-29 23:18:52	2018-12-29	23:18:52	23:18:52
Site 007	striped skunk	2019-01-03 01:43:29	2019-01-03	01:43:29	1:43:29
Site 007	striped skunk	2019-01-03 02:09:10	2019-01-03	02:09:10	2:09:10
Site 007	striped skunk	2019-01-03 03:14:33	2019-01-03	03:14:33	3:14:33
Site 007	striped skunk	2019-01-03 06:03:02	2019-01-03	06:03:02	6:03:02
Site 007	striped skunk	2019-01-04 00:21:11	2019-01-04	00:21:11	0:21:11
Site 007	striped skunk	2019-01-05 00:53:37	2019-01-05	00:53:37	0:53:37
Site 007	striped skunk	2019-01-06 03:53:37	2019-01-06	03:53:37	3:53:37
Site 007	striped skunk	2019-01-06 04:22:53	2019-01-06	04:22:53	4:22:53
Site 007	striped skunk	2019-01-12 01:57:24	2019-01-12	01:57:24	1:57:24
Site 007	striped skunk	2019-01-12 22:12:18	2019-01-12	22:12:18	22:12:18
Site 007	striped skunk	2019-01-15 00:50:28	2019-01-15	00:50:28	0:50:28
Site 007	striped skunk	2019-01-22 04:31:15	2019-01-22	04:31:15	4:31:15
Site 007	striped skunk	2019-01-22 05:14:27	2019-01-22	05:14:27	5:14:27
Site 007	striped skunk	2019-01-23 08:20:52	2019-01-23	08:20:52	8:20:52
Site 007	striped skunk	2019-01-27 01:41:17	2019-01-27	01:41:17	1:41:17
Site 007	striped skunk	2019-01-27 04:13:54	2019-01-27	04:13:54	4:13:54
Site 008	grey fox	2018-05-20 23:13:59	2018-05-20	23:13:59	23:13:59
Site 008	grey fox	2018-05-22 02:07:39	2018-05-22	02:07:39	2:07:39
Site 008	grey fox	2018-06-02 01:15:16	2018-06-02	01:15:16	1:15:16
Site 008	grey fox	2018-07-02 21:21:15	2018-07-02	21:21:15	21:21:15
Site 008	grey fox	2018-08-08 01:43:30	2018-08-08	01:43:30	1:43:30
Site 008	grey fox	2018-09-04 23:41:15	2018-09-04	23:41:15	23:41:15
Site 008	grey fox	2018-09-06 02:15:25	2018-09-06	02:15:25	2:15:25
Site 008	grey fox	2018-09-09 21:10:41	2018-09-09	21:10:41	21:10:41
Site 008	grey fox	2018-09-15 22:23:50	2018-09-15	22:23:50	22:23:50
Site 008	grey fox	2018-09-20 04:09:26	2018-09-20	04:09:26	4:09:26
Site 008	grey fox	2018-09-22 02:02:34	2018-09-22	02:02:34	2:02:34
Site 008	grey fox	2018-09-30 20:53:44	2018-09-30	20:53:44	20:53:44
Site 008	grey fox	2018-09-30 21:33:41	2018-09-30	21:33:41	21:33:41
Site 008	grey fox	2018-10-04 20:36:29	2018-10-04	20:36:29	20:36:29
Site 008	grey fox	2018-10-12 04:41:46	2018-10-12	04:41:46	4:41:46
Site 008	grey fox	2018-10-29 21:50:19	2018-10-29	21:50:19	21:50:19
Site 008	grey fox	2018-10-29 22:24:18	2018-10-29	22:24:18	22:24:18
Site 008	grey fox	2018-10-30 06:00:42	2018-10-30	06:00:42	6:00:42
Site 008	grey fox	2018-10-30 22:47:03	2018-10-30	22:47:03	22:47:03
Site 008	grey fox	2018-11-02 03:37:30	2018-11-02	03:37:30	3:37:30
Site 008	grey fox	2018-11-02 05:18:34	2018-11-02	05:18:34	5:18:34
Site 008	grey fox	2018-11-02 18:57:22	2018-11-02	18:57:22	18:57:22
Site 008	grey fox	2018-11-02 22:10:40	2018-11-02	22:10:40	22:10:40
Site 008	grey fox	2018-11-03 00:20:44	2018-11-03	00:20:44	0:20:44
Site 008	grey fox	2018-11-03 00:57:53	2018-11-03	00:57:53	0:57:53
Site 008	grey fox	2018-11-03 04:47:55	2018-11-03	04:47:55	4:47:55
Site 008	grey fox	2018-11-03 04:56:21	2018-11-03	04:56:21	4:56:21
Site 008	grey fox	2018-11-03 05:26:15	2018-11-03	05:26:15	5:26:15
Site 008	grey fox	2018-11-03 06:10:43	2018-11-03	06:10:43	6:10:43
Site 008	grey fox	2018-11-03 21:19:35	2018-11-03	21:19:35	21:19:35
Site 008	grey fox	2018-11-03 23:31:27	2018-11-03	23:31:27	23:31:27
Site 008	grey fox	2018-11-03 23:40:08	2018-11-03	23:40:08	23:40:08
Site 008	grey fox	2018-11-04 19:32:05	2018-11-04	19:32:05	19:32:05
Site 008	grey fox	2018-11-04 22:23:42	2018-11-04	22:23:42	22:23:42
Site 008	grey fox	2018-11-04 22:47:52	2018-11-04	22:47:52	22:47:52
Site 008	grey fox	2018-11-04 22:51:15	2018-11-04	22:51:15	22:51:15
Site 008	grey fox	2018-11-04 23:17:58	2018-11-04	23:17:58	23:17:58
Site 008	grey fox	2018-11-05 00:15:11	2018-11-05	00:15:11	0:15:11
Site 008	grey fox	2018-11-05 05:00:48	2018-11-05	05:00:48	5:00:48
Site 008	grey fox	2018-11-05 07:20:37	2018-11-05	07:20:37	7:20:37
Site 008	grey fox	2018-11-05 20:41:51	2018-11-05	20:41:51	20:41:51
Site 008	grey fox	2018-11-05 20:44:24	2018-11-05	20:44:24	20:44:24
Site 008	grey fox	2018-11-06 04:55:29	2018-11-06	04:55:29	4:55:29
Site 008	grey fox	2018-11-06 05:41:51	2018-11-06	05:41:51	5:41:51
Site 008	grey fox	2018-11-06 18:54:28	2018-11-06	18:54:28	18:54:28
Site 008	grey fox	2018-11-06 21:13:33	2018-11-06	21:13:33	21:13:33
Site 008	grey fox	2018-11-06 21:24:28	2018-11-06	21:24:28	21:24:28
Site 008	grey fox	2018-11-07 22:41:24	2018-11-07	22:41:24	22:41:24
Site 008	grey fox	2018-11-09 02:52:21	2018-11-09	02:52:21	2:52:21
Site 008	grey fox	2018-11-10 05:32:38	2018-11-10	05:32:38	5:32:38
Site 008	grey fox	2018-11-10 19:53:33	2018-11-10	19:53:33	19:53:33
Site 008	grey fox	2018-11-10 23:06:37	2018-11-10	23:06:37	23:06:37
Site 008	grey fox	2018-11-11 00:43:34	2018-11-11	00:43:34	0:43:34
Site 008	grey fox	2018-11-11 05:40:16	2018-11-11	05:40:16	5:40:16
Site 008	grey fox	2018-11-11 20:21:46	2018-11-11	20:21:46	20:21:46
Site 008	grey fox	2018-11-11 23:45:04	2018-11-11	23:45:04	23:45:04
Site 008	grey fox	2018-11-12 00:45:16	2018-11-12	00:45:16	0:45:16
Site 008	grey fox	2018-11-12 06:00:46	2018-11-12	06:00:46	6:00:46
Site 008	grey fox	2018-11-13 21:59:30	2018-11-13	21:59:30	21:59:30
Site 008	grey fox	2018-11-13 22:11:38	2018-11-13	22:11:38	22:11:38
Site 008	grey fox	2018-11-14 18:38:23	2018-11-14	18:38:23	18:38:23
Site 008	grey fox	2018-11-15 20:17:41	2018-11-15	20:17:41	20:17:41
Site 008	grey fox	2018-11-16 19:44:09	2018-11-16	19:44:09	19:44:09
Site 008	grey fox	2018-11-19 06:40:17	2018-11-19	06:40:17	6:40:17
Site 008	grey fox	2018-11-19 18:36:12	2018-11-19	18:36:12	18:36:12
Site 008	grey fox	2018-11-20 18:56:30	2018-11-20	18:56:30	18:56:30
Site 008	grey fox	2018-11-22 02:10:41	2018-11-22	02:10:41	2:10:41
Site 008	grey fox	2018-11-22 22:52:36	2018-11-22	22:52:36	22:52:36
Site 008	grey fox	2018-11-24 05:37:22	2018-11-24	05:37:22	5:37:22
Site 008	grey fox	2018-11-24 18:44:42	2018-11-24	18:44:42	18:44:42
Site 008	grey fox	2018-11-26 20:36:51	2018-11-26	20:36:51	20:36:51
Site 008	grey fox	2018-11-28 18:57:24	2018-11-28	18:57:24	18:57:24
Site 008	grey fox	2018-11-29 19:29:29	2018-11-29	19:29:29	19:29:29
Site 008	grey fox	2018-12-04 18:47:51	2018-12-04	18:47:51	18:47:51
Site 008	grey fox	2018-12-04 20:00:06	2018-12-04	20:00:06	20:00:06
Site 008	grey fox	2018-12-05 19:59:23	2018-12-05	19:59:23	19:59:23
Site 008	grey fox	2018-12-06 21:04:30	2018-12-06	21:04:30	21:04:30
Site 008	grey fox	2018-12-15 00:47:29	2018-12-15	00:47:29	0:47:29
Site 008	grey fox	2018-12-16 02:50:30	2018-12-16	02:50:30	2:50:30
Site 008	grey fox	2018-12-19 23:29:09	2018-12-19	23:29:09	23:29:09
Site 008	grey fox	2018-12-20 18:00:29	2018-12-20	18:00:29	18:00:29
Site 008	grey fox	2018-12-21 20:12:38	2018-12-21	20:12:38	20:12:38
Site 008	grey fox	2018-12-21 22:33:50	2018-12-21	22:33:50	22:33:50
Site 008	grey fox	2018-12-23 05:34:32	2018-12-23	05:34:32	5:34:32
Site 008	grey fox	2018-12-26 01:36:29	2018-12-26	01:36:29	1:36:29
Site 008	grey fox	2018-12-27 05:46:46	2018-12-27	05:46:46	5:46:46
Site 008	grey fox	2018-12-28 21:30:05	2018-12-28	21:30:05	21:30:05
Site 008	grey fox	2018-12-29 05:06:07	2018-12-29	05:06:07	5:06:07
Site 008	grey fox	2018-12-31 20:42:35	2018-12-31	20:42:35	20:42:35
Site 008	grey fox	2019-01-02 00:47:19	2019-01-02	00:47:19	0:47:19
Site 008	grey fox	2019-01-04 23:36:21	2019-01-04	23:36:21	23:36:21
Site 008	grey fox	2019-01-05 01:25:08	2019-01-05	01:25:08	1:25:08
Site 008	grey fox	2019-01-06 20:40:35	2019-01-06	20:40:35	20:40:35
Site 008	grey fox	2019-01-06 20:44:41	2019-01-06	20:44:41	20:44:41
Site 008	grey fox	2019-01-11 04:55:01	2019-01-11	04:55:01	4:55:01
Site 008	grey fox	2019-01-11 05:01:56	2019-01-11	05:01:56	5:01:56
Site 008	grey fox	2019-01-14 23:12:26	2019-01-14	23:12:26	23:12:26
Site 008	grey fox	2019-01-19 20:11:45	2019-01-19	20:11:45	20:11:45
Site 008	grey fox	2019-01-21 19:49:30	2019-01-21	19:49:30	19:49:30
Site 008	opossum	2018-06-02 22:17:00	2018-06-02	22:17:00	22:17:00
Site 008	opossum	2018-06-02 22:24:39	2018-06-02	22:24:39	22:24:39
Site 008	opossum	2018-07-03 23:09:33	2018-07-03	23:09:33	23:09:33
Site 008	opossum	2018-07-10 02:30:55	2018-07-10	02:30:55	2:30:55
Site 008	opossum	2018-07-10 03:55:34	2018-07-10	03:55:34	3:55:34
Site 008	opossum	2018-07-10 04:53:47	2018-07-10	04:53:47	4:53:47
Site 008	opossum	2018-07-30 22:07:23	2018-07-30	22:07:23	22:07:23
Site 008	opossum	2018-07-31 02:26:57	2018-07-31	02:26:57	2:26:57
Site 008	opossum	2018-08-04 22:36:54	2018-08-04	22:36:54	22:36:54
Site 008	opossum	2018-08-05 00:20:03	2018-08-05	00:20:03	0:20:03
Site 008	opossum	2018-08-06 02:24:24	2018-08-06	02:24:24	2:24:24
Site 008	opossum	2018-08-09 02:17:06	2018-08-09	02:17:06	2:17:06
Site 008	opossum	2018-08-12 02:50:50	2018-08-12	02:50:50	2:50:50
Site 008	opossum	2018-08-14 03:58:32	2018-08-14	03:58:32	3:58:32
Site 008	opossum	2018-08-22 01:46:47	2018-08-22	01:46:47	1:46:47
Site 008	opossum	2018-08-23 01:38:33	2018-08-23	01:38:33	1:38:33
Site 008	opossum	2018-08-25 21:35:40	2018-08-25	21:35:40	21:35:40
Site 008	opossum	2018-08-26 02:08:05	2018-08-26	02:08:05	2:08:05
Site 008	opossum	2018-08-26 03:16:57	2018-08-26	03:16:57	3:16:57
Site 008	opossum	2018-08-26 05:20:51	2018-08-26	05:20:51	5:20:51
Site 008	opossum	2018-08-27 04:16:02	2018-08-27	04:16:02	4:16:02
Site 008	opossum	2018-08-27 04:36:17	2018-08-27	04:36:17	4:36:17
Site 008	opossum	2018-08-28 00:41:30	2018-08-28	00:41:30	0:41:30
Site 008	opossum	2018-08-28 01:14:52	2018-08-28	01:14:52	1:14:52
Site 008	opossum	2018-09-22 02:56:24	2018-09-22	02:56:24	2:56:24
Site 008	opossum	2018-09-26 02:03:35	2018-09-26	02:03:35	2:03:35
Site 008	opossum	2018-09-27 04:36:56	2018-09-27	04:36:56	4:36:56
Site 008	opossum	2018-10-01 01:35:06	2018-10-01	01:35:06	1:35:06
Site 008	opossum	2018-10-06 04:58:19	2018-10-06	04:58:19	4:58:19
Site 008	opossum	2018-10-14 01:31:31	2018-10-14	01:31:31	1:31:31
Site 008	opossum	2018-10-16 01:39:39	2018-10-16	01:39:39	1:39:39
Site 008	opossum	2018-10-16 01:56:35	2018-10-16	01:56:35	1:56:35
Site 008	opossum	2018-10-21 20:14:41	2018-10-21	20:14:41	20:14:41
Site 008	opossum	2018-10-21 20:19:52	2018-10-21	20:19:52	20:19:52
Site 008	opossum	2018-10-28 22:32:07	2018-10-28	22:32:07	22:32:07
Site 008	opossum	2018-10-31 02:06:08	2018-10-31	02:06:08	2:06:08
Site 008	opossum	2018-10-31 02:48:22	2018-10-31	02:48:22	2:48:22
Site 008	opossum	2018-11-01 22:48:45	2018-11-01	22:48:45	22:48:45
Site 008	opossum	2018-11-01 22:55:49	2018-11-01	22:55:49	22:55:49
Site 008	opossum	2018-11-15 23:01:45	2018-11-15	23:01:45	23:01:45
Site 008	opossum	2018-11-15 23:49:30	2018-11-15	23:49:30	23:49:30
Site 008	opossum	2018-11-16 00:17:31	2018-11-16	00:17:31	0:17:31
Site 008	opossum	2018-11-16 00:22:36	2018-11-16	00:22:36	0:22:36
Site 008	opossum	2018-11-19 07:32:11	2018-11-19	07:32:11	7:32:11
Site 008	opossum	2018-11-22 21:12:00	2018-11-22	21:12:00	21:12:00
Site 008	opossum	2018-11-22 21:25:51	2018-11-22	21:25:51	21:25:51
Site 008	opossum	2018-11-22 22:15:23	2018-11-22	22:15:23	22:15:23
Site 008	opossum	2018-11-27 01:16:26	2018-11-27	01:16:26	1:16:26
Site 008	opossum	2018-11-27 21:31:49	2018-11-27	21:31:49	21:31:49
Site 008	opossum	2018-11-30 23:56:50	2018-11-30	23:56:50	23:56:50
Site 008	opossum	2018-12-01 00:36:24	2018-12-01	00:36:24	0:36:24
Site 008	opossum	2018-12-01 00:48:31	2018-12-01	00:48:31	0:48:31
Site 008	opossum	2018-12-10 02:40:03	2018-12-10	02:40:03	2:40:03
Site 008	opossum	2018-12-10 02:42:32	2018-12-10	02:42:32	2:42:32
Site 008	raccoon	2018-05-05 03:20:07	2018-05-05	03:20:07	3:20:07
Site 008	raccoon	2018-05-22 22:23:23	2018-05-22	22:23:23	22:23:23
Site 008	raccoon	2018-05-24 23:24:59	2018-05-24	23:24:59	23:24:59
Site 008	raccoon	2018-05-27 22:58:03	2018-05-27	22:58:03	22:58:03
Site 008	raccoon	2018-05-28 22:18:55	2018-05-28	22:18:55	22:18:55
Site 008	raccoon	2018-05-29 03:44:01	2018-05-29	03:44:01	3:44:01
Site 008	raccoon	2018-06-06 02:00:39	2018-06-06	02:00:39	2:00:39
Site 008	raccoon	2018-06-06 23:27:29	2018-06-06	23:27:29	23:27:29
Site 008	raccoon	2018-06-06 23:30:01	2018-06-06	23:30:01	23:30:01
Site 008	raccoon	2018-06-08 01:04:45	2018-06-08	01:04:45	1:04:45
Site 008	raccoon	2018-06-15 23:31:23	2018-06-15	23:31:23	23:31:23
Site 008	raccoon	2018-06-18 22:34:17	2018-06-18	22:34:17	22:34:17
Site 008	raccoon	2018-06-25 01:44:38	2018-06-25	01:44:38	1:44:38
Site 008	raccoon	2018-06-25 02:54:59	2018-06-25	02:54:59	2:54:59
Site 008	raccoon	2018-07-10 01:13:32	2018-07-10	01:13:32	1:13:32
Site 008	raccoon	2018-07-12 01:50:27	2018-07-12	01:50:27	1:50:27
Site 008	raccoon	2018-07-15 01:29:31	2018-07-15	01:29:31	1:29:31
Site 008	raccoon	2018-07-15 03:58:46	2018-07-15	03:58:46	3:58:46
Site 008	raccoon	2018-07-16 01:54:07	2018-07-16	01:54:07	1:54:07
Site 008	raccoon	2018-07-21 03:52:20	2018-07-21	03:52:20	3:52:20
Site 008	raccoon	2018-07-21 23:22:50	2018-07-21	23:22:50	23:22:50
Site 008	raccoon	2018-07-21 23:23:54	2018-07-21	23:23:54	23:23:54
Site 008	raccoon	2018-07-23 04:17:05	2018-07-23	04:17:05	4:17:05
Site 008	raccoon	2018-07-24 02:08:39	2018-07-24	02:08:39	2:08:39
Site 008	raccoon	2018-07-25 01:28:23	2018-07-25	01:28:23	1:28:23
Site 008	raccoon	2018-07-25 02:53:30	2018-07-25	02:53:30	2:53:30
Site 008	raccoon	2018-07-25 22:34:52	2018-07-25	22:34:52	22:34:52
Site 008	raccoon	2018-07-26 00:31:13	2018-07-26	00:31:13	0:31:13
Site 008	raccoon	2018-07-26 03:18:31	2018-07-26	03:18:31	3:18:31
Site 008	raccoon	2018-07-26 03:28:09	2018-07-26	03:28:09	3:28:09
Site 008	raccoon	2018-07-26 04:43:50	2018-07-26	04:43:50	4:43:50
Site 008	raccoon	2018-07-27 04:40:49	2018-07-27	04:40:49	4:40:49
Site 008	raccoon	2018-07-28 00:33:02	2018-07-28	00:33:02	0:33:02
Site 008	raccoon	2018-07-28 20:50:28	2018-07-28	20:50:28	20:50:28
Site 008	raccoon	2018-07-29 23:10:41	2018-07-29	23:10:41	23:10:41
Site 008	raccoon	2018-07-30 01:26:17	2018-07-30	01:26:17	1:26:17
Site 008	raccoon	2018-07-30 03:48:05	2018-07-30	03:48:05	3:48:05
Site 008	raccoon	2018-08-02 04:25:46	2018-08-02	04:25:46	4:25:46
Site 008	raccoon	2018-08-02 04:31:35	2018-08-02	04:31:35	4:31:35
Site 008	raccoon	2018-08-04 01:58:20	2018-08-04	01:58:20	1:58:20
Site 008	raccoon	2018-08-04 02:18:51	2018-08-04	02:18:51	2:18:51
Site 008	raccoon	2018-08-04 04:35:52	2018-08-04	04:35:52	4:35:52
Site 008	raccoon	2018-08-06 01:54:46	2018-08-06	01:54:46	1:54:46
Site 008	raccoon	2018-08-07 03:19:01	2018-08-07	03:19:01	3:19:01
Site 008	raccoon	2018-08-08 01:03:26	2018-08-08	01:03:26	1:03:26
Site 008	raccoon	2018-08-09 00:41:26	2018-08-09	00:41:26	0:41:26
Site 008	raccoon	2018-08-11 23:19:22	2018-08-11	23:19:22	23:19:22
Site 008	raccoon	2018-08-14 00:30:06	2018-08-14	00:30:06	0:30:06
Site 008	raccoon	2018-08-15 02:17:25	2018-08-15	02:17:25	2:17:25
Site 008	raccoon	2018-08-16 03:33:45	2018-08-16	03:33:45	3:33:45
Site 008	raccoon	2018-08-16 04:23:21	2018-08-16	04:23:21	4:23:21
Site 008	raccoon	2018-08-17 01:56:56	2018-08-17	01:56:56	1:56:56
Site 008	raccoon	2018-08-19 03:10:16	2018-08-19	03:10:16	3:10:16
Site 008	raccoon	2018-08-20 03:53:43	2018-08-20	03:53:43	3:53:43
Site 008	raccoon	2018-08-20 04:17:25	2018-08-20	04:17:25	4:17:25
Site 008	raccoon	2018-08-21 00:28:07	2018-08-21	00:28:07	0:28:07
Site 008	raccoon	2018-08-21 00:29:36	2018-08-21	00:29:36	0:29:36
Site 008	raccoon	2018-08-21 00:37:29	2018-08-21	00:37:29	0:37:29
Site 008	raccoon	2018-08-21 04:21:45	2018-08-21	04:21:45	4:21:45
Site 008	raccoon	2018-08-23 22:01:42	2018-08-23	22:01:42	22:01:42
Site 008	raccoon	2018-08-23 23:09:25	2018-08-23	23:09:25	23:09:25
Site 008	raccoon	2018-08-24 02:22:24	2018-08-24	02:22:24	2:22:24
Site 008	raccoon	2018-08-24 02:36:34	2018-08-24	02:36:34	2:36:34
Site 008	raccoon	2018-08-24 23:58:29	2018-08-24	23:58:29	23:58:29
Site 008	raccoon	2018-08-25 02:32:42	2018-08-25	02:32:42	2:32:42
Site 008	raccoon	2018-08-25 23:22:11	2018-08-25	23:22:11	23:22:11
Site 008	raccoon	2018-08-26 03:38:29	2018-08-26	03:38:29	3:38:29
Site 008	raccoon	2018-08-29 02:24:40	2018-08-29	02:24:40	2:24:40
Site 008	raccoon	2018-08-29 03:09:43	2018-08-29	03:09:43	3:09:43
Site 008	raccoon	2018-09-01 01:24:43	2018-09-01	01:24:43	1:24:43
Site 008	raccoon	2018-09-01 02:48:43	2018-09-01	02:48:43	2:48:43
Site 008	raccoon	2018-09-01 04:43:21	2018-09-01	04:43:21	4:43:21
Site 008	raccoon	2018-09-01 21:36:46	2018-09-01	21:36:46	21:36:46
Site 008	raccoon	2018-09-01 21:39:55	2018-09-01	21:39:55	21:39:55
Site 008	raccoon	2018-09-01 21:41:00	2018-09-01	21:41:00	21:41:00
Site 008	raccoon	2018-09-01 22:02:30	2018-09-01	22:02:30	22:02:30
Site 008	raccoon	2018-09-02 01:23:31	2018-09-02	01:23:31	1:23:31
Site 008	raccoon	2018-09-02 01:24:36	2018-09-02	01:24:36	1:24:36
Site 008	raccoon	2018-09-02 01:25:41	2018-09-02	01:25:41	1:25:41
Site 008	raccoon	2018-09-03 00:52:52	2018-09-03	00:52:52	0:52:52
Site 008	raccoon	2018-09-03 00:53:56	2018-09-03	00:53:56	0:53:56
Site 008	raccoon	2018-09-03 04:18:25	2018-09-03	04:18:25	4:18:25
Site 008	raccoon	2018-09-04 03:39:51	2018-09-04	03:39:51	3:39:51
Site 008	raccoon	2018-09-06 03:50:52	2018-09-06	03:50:52	3:50:52
Site 008	raccoon	2018-09-06 04:49:21	2018-09-06	04:49:21	4:49:21
Site 008	raccoon	2018-09-06 21:48:43	2018-09-06	21:48:43	21:48:43
Site 008	raccoon	2018-09-07 00:16:19	2018-09-07	00:16:19	0:16:19
Site 008	raccoon	2018-09-08 01:05:42	2018-09-08	01:05:42	1:05:42
Site 008	raccoon	2018-09-09 03:23:55	2018-09-09	03:23:55	3:23:55
Site 008	raccoon	2018-09-09 03:24:59	2018-09-09	03:24:59	3:24:59
Site 008	raccoon	2018-09-09 03:42:42	2018-09-09	03:42:42	3:42:42
Site 008	raccoon	2018-09-09 03:43:46	2018-09-09	03:43:46	3:43:46
Site 008	raccoon	2018-09-09 03:44:50	2018-09-09	03:44:50	3:44:50
Site 008	raccoon	2018-09-09 03:52:04	2018-09-09	03:52:04	3:52:04
Site 008	raccoon	2018-09-09 03:53:10	2018-09-09	03:53:10	3:53:10
Site 008	raccoon	2018-09-09 04:42:55	2018-09-09	04:42:55	4:42:55
Site 008	raccoon	2018-09-10 01:23:05	2018-09-10	01:23:05	1:23:05
Site 008	raccoon	2018-09-11 01:07:52	2018-09-11	01:07:52	1:07:52
Site 008	raccoon	2018-09-12 01:36:48	2018-09-12	01:36:48	1:36:48
Site 008	raccoon	2018-09-14 04:24:12	2018-09-14	04:24:12	4:24:12
Site 008	raccoon	2018-09-14 22:27:33	2018-09-14	22:27:33	22:27:33
Site 008	raccoon	2018-09-17 01:04:43	2018-09-17	01:04:43	1:04:43
Site 008	raccoon	2018-09-17 23:40:32	2018-09-17	23:40:32	23:40:32
Site 008	raccoon	2018-09-18 03:32:06	2018-09-18	03:32:06	3:32:06
Site 008	raccoon	2018-09-19 23:25:08	2018-09-19	23:25:08	23:25:08
Site 008	raccoon	2018-09-21 22:06:47	2018-09-21	22:06:47	22:06:47
Site 008	raccoon	2018-09-23 03:18:04	2018-09-23	03:18:04	3:18:04
Site 008	raccoon	2018-09-23 23:01:42	2018-09-23	23:01:42	23:01:42
Site 008	raccoon	2018-09-23 23:02:56	2018-09-23	23:02:56	23:02:56
Site 008	raccoon	2018-09-23 23:04:11	2018-09-23	23:04:11	23:04:11
Site 008	raccoon	2018-09-23 23:05:16	2018-09-23	23:05:16	23:05:16
Site 008	raccoon	2018-09-25 01:57:35	2018-09-25	01:57:35	1:57:35
Site 008	raccoon	2018-09-27 02:47:48	2018-09-27	02:47:48	2:47:48
Site 008	raccoon	2018-09-28 01:31:22	2018-09-28	01:31:22	1:31:22
Site 008	raccoon	2018-09-28 03:25:18	2018-09-28	03:25:18	3:25:18
Site 008	raccoon	2018-09-28 03:30:23	2018-09-28	03:30:23	3:30:23
Site 008	raccoon	2018-09-28 04:11:31	2018-09-28	04:11:31	4:11:31
Site 008	raccoon	2018-09-29 03:36:12	2018-09-29	03:36:12	3:36:12
Site 008	raccoon	2018-09-29 23:16:57	2018-09-29	23:16:57	23:16:57
Site 008	raccoon	2018-09-29 23:31:12	2018-09-29	23:31:12	23:31:12
Site 008	raccoon	2018-09-30 01:58:50	2018-09-30	01:58:50	1:58:50
Site 008	raccoon	2018-10-02 02:02:50	2018-10-02	02:02:50	2:02:50
Site 008	raccoon	2018-10-03 00:21:11	2018-10-03	00:21:11	0:21:11
Site 008	raccoon	2018-10-03 00:22:18	2018-10-03	00:22:18	0:22:18
Site 008	raccoon	2018-10-05 02:06:30	2018-10-05	02:06:30	2:06:30
Site 008	raccoon	2018-10-08 00:33:54	2018-10-08	00:33:54	0:33:54
Site 008	raccoon	2018-10-08 02:25:34	2018-10-08	02:25:34	2:25:34
Site 008	raccoon	2018-10-11 02:03:18	2018-10-11	02:03:18	2:03:18
Site 008	raccoon	2018-10-11 04:55:47	2018-10-11	04:55:47	4:55:47
Site 008	raccoon	2018-10-11 06:25:31	2018-10-11	06:25:31	6:25:31
Site 008	raccoon	2018-10-12 02:04:51	2018-10-12	02:04:51	2:04:51
Site 008	raccoon	2018-10-12 02:06:00	2018-10-12	02:06:00	2:06:00
Site 008	raccoon	2018-10-13 04:05:05	2018-10-13	04:05:05	4:05:05
Site 008	raccoon	2018-10-14 00:57:06	2018-10-14	00:57:06	0:57:06
Site 008	raccoon	2018-10-15 04:18:45	2018-10-15	04:18:45	4:18:45
Site 008	raccoon	2018-10-15 04:19:49	2018-10-15	04:19:49	4:19:49
Site 008	raccoon	2018-10-20 03:01:47	2018-10-20	03:01:47	3:01:47
Site 008	raccoon	2018-10-20 03:09:02	2018-10-20	03:09:02	3:09:02
Site 008	raccoon	2018-10-20 03:19:10	2018-10-20	03:19:10	3:19:10
Site 008	raccoon	2018-10-22 02:22:43	2018-10-22	02:22:43	2:22:43
Site 008	raccoon	2018-10-22 02:23:53	2018-10-22	02:23:53	2:23:53
Site 008	raccoon	2018-10-22 02:27:16	2018-10-22	02:27:16	2:27:16
Site 008	raccoon	2018-10-22 02:28:21	2018-10-22	02:28:21	2:28:21
Site 008	raccoon	2018-10-22 02:29:27	2018-10-22	02:29:27	2:29:27
Site 008	raccoon	2018-10-22 02:31:30	2018-10-22	02:31:30	2:31:30
Site 008	raccoon	2018-10-22 02:32:39	2018-10-22	02:32:39	2:32:39
Site 008	raccoon	2018-10-22 02:33:53	2018-10-22	02:33:53	2:33:53
Site 008	raccoon	2018-10-22 02:35:27	2018-10-22	02:35:27	2:35:27
Site 008	raccoon	2018-10-22 02:37:01	2018-10-22	02:37:01	2:37:01
Site 008	raccoon	2018-10-22 02:38:20	2018-10-22	02:38:20	2:38:20
Site 008	raccoon	2018-10-22 02:39:39	2018-10-22	02:39:39	2:39:39
Site 008	raccoon	2018-10-22 02:41:36	2018-10-22	02:41:36	2:41:36
Site 008	raccoon	2018-10-23 22:40:17	2018-10-23	22:40:17	22:40:17
Site 008	raccoon	2018-10-23 22:41:30	2018-10-23	22:41:30	22:41:30
Site 008	raccoon	2018-10-24 04:57:26	2018-10-24	04:57:26	4:57:26
Site 008	raccoon	2018-10-24 20:02:47	2018-10-24	20:02:47	20:02:47
Site 008	raccoon	2018-10-28 22:04:03	2018-10-28	22:04:03	22:04:03
Site 008	raccoon	2018-10-28 22:46:46	2018-10-28	22:46:46	22:46:46
Site 008	raccoon	2018-10-28 22:56:41	2018-10-28	22:56:41	22:56:41
Site 008	raccoon	2018-10-30 01:16:35	2018-10-30	01:16:35	1:16:35
Site 008	raccoon	2018-11-02 03:21:26	2018-11-02	03:21:26	3:21:26
Site 008	raccoon	2018-11-05 05:08:46	2018-11-05	05:08:46	5:08:46
Site 008	raccoon	2018-11-06 04:46:14	2018-11-06	04:46:14	4:46:14
Site 008	raccoon	2018-11-09 03:49:36	2018-11-09	03:49:36	3:49:36
Site 008	raccoon	2018-11-09 03:52:23	2018-11-09	03:52:23	3:52:23
Site 008	raccoon	2018-11-14 03:19:58	2018-11-14	03:19:58	3:19:58
Site 008	raccoon	2018-11-16 01:29:28	2018-11-16	01:29:28	1:29:28
Site 008	raccoon	2018-11-18 01:39:26	2018-11-18	01:39:26	1:39:26
Site 008	raccoon	2018-11-18 01:41:11	2018-11-18	01:41:11	1:41:11
Site 008	raccoon	2018-11-19 06:37:29	2018-11-19	06:37:29	6:37:29
Site 008	raccoon	2018-11-19 23:04:03	2018-11-19	23:04:03	23:04:03
Site 008	raccoon	2018-11-20 04:54:07	2018-11-20	04:54:07	4:54:07
Site 008	raccoon	2018-11-20 04:55:12	2018-11-20	04:55:12	4:55:12
Site 008	raccoon	2018-11-20 04:56:16	2018-11-20	04:56:16	4:56:16
Site 008	raccoon	2018-11-22 22:55:36	2018-11-22	22:55:36	22:55:36
Site 008	raccoon	2018-11-26 06:34:43	2018-11-26	06:34:43	6:34:43
Site 008	raccoon	2018-11-28 02:04:21	2018-11-28	02:04:21	2:04:21
Site 008	raccoon	2018-11-28 02:05:31	2018-11-28	02:05:31	2:05:31
Site 008	raccoon	2018-11-28 03:29:58	2018-11-28	03:29:58	3:29:58
Site 008	raccoon	2018-11-29 23:39:43	2018-11-29	23:39:43	23:39:43
Site 008	raccoon	2018-12-02 03:07:56	2018-12-02	03:07:56	3:07:56
Site 008	raccoon	2018-12-02 21:17:13	2018-12-02	21:17:13	21:17:13
Site 008	raccoon	2018-12-02 21:18:18	2018-12-02	21:18:18	21:18:18
Site 008	raccoon	2018-12-03 03:21:53	2018-12-03	03:21:53	3:21:53
Site 008	raccoon	2018-12-06 04:02:33	2018-12-06	04:02:33	4:02:33
Site 008	raccoon	2018-12-06 23:38:11	2018-12-06	23:38:11	23:38:11
Site 008	raccoon	2018-12-12 01:27:12	2018-12-12	01:27:12	1:27:12
Site 008	raccoon	2018-12-18 22:20:31	2018-12-18	22:20:31	22:20:31
Site 008	raccoon	2018-12-22 03:21:31	2018-12-22	03:21:31	3:21:31
Site 008	raccoon	2018-12-23 05:27:31	2018-12-23	05:27:31	5:27:31
Site 008	raccoon	2018-12-27 05:18:13	2018-12-27	05:18:13	5:18:13
Site 008	raccoon	2018-12-30 00:39:14	2018-12-30	00:39:14	0:39:14
Site 008	raccoon	2018-12-30 00:40:18	2018-12-30	00:40:18	0:40:18
Site 008	raccoon	2018-12-30 03:18:55	2018-12-30	03:18:55	3:18:55
Site 008	raccoon	2018-12-30 03:40:20	2018-12-30	03:40:20	3:40:20
Site 008	raccoon	2018-12-31 02:33:43	2018-12-31	02:33:43	2:33:43
Site 008	raccoon	2019-01-03 05:04:57	2019-01-03	05:04:57	5:04:57
Site 008	raccoon	2019-01-04 23:06:34	2019-01-04	23:06:34	23:06:34
Site 008	raccoon	2019-01-04 23:07:39	2019-01-04	23:07:39	23:07:39
Site 008	raccoon	2019-01-07 04:45:04	2019-01-07	04:45:04	4:45:04
Site 008	raccoon	2019-01-10 21:25:58	2019-01-10	21:25:58	21:25:58
Site 008	raccoon	2019-01-10 21:28:14	2019-01-10	21:28:14	21:28:14
Site 008	raccoon	2019-01-10 21:29:28	2019-01-10	21:29:28	21:29:28
Site 008	raccoon	2019-01-21 02:41:48	2019-01-21	02:41:48	2:41:48
Site 008	raccoon	2019-01-21 02:43:49	2019-01-21	02:43:49	2:43:49
Site 008	raccoon	2019-01-23 20:19:16	2019-01-23	20:19:16	20:19:16
Site 008	raccoon	2019-01-25 22:15:15	2019-01-25	22:15:15	22:15:15
Site 008	raccoon	2019-01-25 22:18:14	2019-01-25	22:18:14	22:18:14
Site 008	raccoon	2019-01-26 01:15:43	2019-01-26	01:15:43	1:15:43
Site 008	raccoon	2019-01-26 03:37:08	2019-01-26	03:37:08	3:37:08
Site 008	raccoon	2019-01-26 03:39:21	2019-01-26	03:39:21	3:39:21
Site 009	bobcat	2018-10-11 03:32:45	2018-10-11	03:32:45	3:32:45
Site 009	grey fox	2018-04-21 07:00:22	2018-04-21	07:00:22	7:00:22
Site 009	grey fox	2018-04-28 04:04:57	2018-04-28	04:04:57	4:04:57
Site 009	grey fox	2018-05-07 04:31:56	2018-05-07	04:31:56	4:31:56
Site 009	grey fox	2018-05-25 17:50:53	2018-05-25	17:50:53	17:50:53
Site 009	grey fox	2018-05-25 17:54:13	2018-05-25	17:54:13	17:54:13
Site 009	grey fox	2018-06-27 04:53:45	2018-06-27	04:53:45	4:53:45
Site 009	grey fox	2018-10-29 18:39:02	2018-10-29	18:39:02	18:39:02
Site 009	grey fox	2018-11-01 19:52:38	2018-11-01	19:52:38	19:52:38
Site 009	grey fox	2018-11-05 22:09:48	2018-11-05	22:09:48	22:09:48
Site 009	grey fox	2018-11-10 07:09:51	2018-11-10	07:09:51	7:09:51
Site 009	grey fox	2018-11-10 18:12:21	2018-11-10	18:12:21	18:12:21
Site 009	grey fox	2018-11-18 19:29:05	2018-11-18	19:29:05	19:29:05
Site 009	grey fox	2018-11-22 04:15:26	2018-11-22	04:15:26	4:15:26
Site 009	grey fox	2018-11-22 06:15:38	2018-11-22	06:15:38	6:15:38
Site 009	grey fox	2018-11-25 07:13:29	2018-11-25	07:13:29	7:13:29
Site 009	grey fox	2018-11-27 00:58:01	2018-11-27	00:58:01	0:58:01
Site 009	grey fox	2018-11-27 04:04:55	2018-11-27	04:04:55	4:04:55
Site 009	grey fox	2018-11-30 22:07:02	2018-11-30	22:07:02	22:07:02
Site 009	grey fox	2018-12-06 18:20:09	2018-12-06	18:20:09	18:20:09
Site 009	grey fox	2018-12-12 01:54:34	2018-12-12	01:54:34	1:54:34
Site 009	grey fox	2018-12-12 23:25:46	2018-12-12	23:25:46	23:25:46
Site 009	grey fox	2018-12-13 04:18:49	2018-12-13	04:18:49	4:18:49
Site 009	grey fox	2018-12-14 07:22:47	2018-12-14	07:22:47	7:22:47
Site 009	grey fox	2018-12-15 04:20:22	2018-12-15	04:20:22	4:20:22
Site 009	grey fox	2018-12-17 05:42:36	2018-12-17	05:42:36	5:42:36
Site 009	grey fox	2018-12-19 07:59:26	2018-12-19	07:59:26	7:59:26
Site 009	grey fox	2018-12-21 00:25:50	2018-12-21	00:25:50	0:25:50
Site 009	grey fox	2018-12-24 07:41:47	2018-12-24	07:41:47	7:41:47
Site 009	grey fox	2018-12-26 03:31:19	2018-12-26	03:31:19	3:31:19
Site 009	grey fox	2018-12-29 07:49:28	2018-12-29	07:49:28	7:49:28
Site 009	grey fox	2019-01-09 07:12:40	2019-01-09	07:12:40	7:12:40
Site 009	grey fox	2019-01-15 06:40:59	2019-01-15	06:40:59	6:40:59
Site 009	grey fox	2019-01-18 07:30:55	2019-01-18	07:30:55	7:30:55
Site 009	grey fox	2019-01-21 02:42:31	2019-01-21	02:42:31	2:42:31
Site 009	grey fox	2019-01-21 03:46:51	2019-01-21	03:46:51	3:46:51
Site 009	grey fox	2019-01-22 08:07:01	2019-01-22	08:07:01	8:07:01
Site 009	grey fox	2019-01-23 00:23:47	2019-01-23	00:23:47	0:23:47
Site 009	grey fox	2019-01-23 00:25:32	2019-01-23	00:25:32	0:25:32
Site 009	grey fox	2019-01-24 01:25:42	2019-01-24	01:25:42	1:25:42
Site 009	grey fox	2019-01-25 18:24:25	2019-01-25	18:24:25	18:24:25
Site 009	opossum	2018-09-09 22:39:02	2018-09-09	22:39:02	22:39:02
Site 009	opossum	2018-09-11 03:08:18	2018-09-11	03:08:18	3:08:18
Site 009	opossum	2018-09-12 22:21:50	2018-09-12	22:21:50	22:21:50
Site 009	opossum	2018-09-13 20:46:00	2018-09-13	20:46:00	20:46:00
Site 009	opossum	2018-09-14 20:46:03	2018-09-14	20:46:03	20:46:03
Site 009	opossum	2018-09-14 20:51:35	2018-09-14	20:51:35	20:51:35
Site 009	opossum	2018-09-14 20:52:54	2018-09-14	20:52:54	20:52:54
Site 009	opossum	2018-09-15 21:20:22	2018-09-15	21:20:22	21:20:22
Site 009	opossum	2018-09-15 21:23:41	2018-09-15	21:23:41	21:23:41
Site 009	opossum	2018-09-18 23:10:11	2018-09-18	23:10:11	23:10:11
Site 009	opossum	2018-09-21 02:45:57	2018-09-21	02:45:57	2:45:57
Site 009	opossum	2018-09-28 23:32:59	2018-09-28	23:32:59	23:32:59
Site 009	opossum	2018-09-29 00:36:49	2018-09-29	00:36:49	0:36:49
Site 009	opossum	2018-10-06 20:25:41	2018-10-06	20:25:41	20:25:41
Site 009	opossum	2018-10-08 05:00:42	2018-10-08	05:00:42	5:00:42
Site 009	opossum	2018-10-13 00:02:50	2018-10-13	00:02:50	0:02:50
Site 009	opossum	2018-10-29 23:59:47	2018-10-29	23:59:47	23:59:47
Site 009	opossum	2018-11-04 01:02:34	2018-11-04	01:02:34	1:02:34
Site 009	opossum	2018-11-15 01:58:52	2018-11-15	01:58:52	1:58:52
Site 009	opossum	2018-11-15 06:09:54	2018-11-15	06:09:54	6:09:54
Site 009	opossum	2018-11-16 02:28:07	2018-11-16	02:28:07	2:28:07
Site 009	opossum	2018-12-03 00:16:21	2018-12-03	00:16:21	0:16:21
Site 009	opossum	2018-12-10 00:31:51	2018-12-10	00:31:51	0:31:51
Site 009	opossum	2019-01-11 21:29:19	2019-01-11	21:29:19	21:29:19
Site 009	opossum	2019-01-16 19:02:17	2019-01-16	19:02:17	19:02:17
Site 009	raccoon	2018-04-24 22:27:17	2018-04-24	22:27:17	22:27:17
Site 009	raccoon	2018-04-29 02:56:16	2018-04-29	02:56:16	2:56:16
Site 009	raccoon	2018-05-02 23:55:22	2018-05-02	23:55:22	23:55:22
Site 009	raccoon	2018-05-05 04:22:36	2018-05-05	04:22:36	4:22:36
Site 009	raccoon	2018-05-09 21:40:25	2018-05-09	21:40:25	21:40:25
Site 009	raccoon	2018-05-24 22:03:35	2018-05-24	22:03:35	22:03:35
Site 009	raccoon	2018-05-25 00:14:44	2018-05-25	00:14:44	0:14:44
Site 009	raccoon	2018-07-23 04:25:30	2018-07-23	04:25:30	4:25:30
Site 009	raccoon	2018-07-23 04:26:53	2018-07-23	04:26:53	4:26:53
Site 009	raccoon	2018-09-09 23:02:23	2018-09-09	23:02:23	23:02:23
Site 009	raccoon	2018-09-19 01:36:47	2018-09-19	01:36:47	1:36:47
Site 009	raccoon	2018-10-25 23:32:14	2018-10-25	23:32:14	23:32:14
Site 009	raccoon	2018-10-29 02:19:29	2018-10-29	02:19:29	2:19:29
Site 009	raccoon	2018-11-05 05:12:08	2018-11-05	05:12:08	5:12:08
Site 009	raccoon	2018-11-14 04:41:47	2018-11-14	04:41:47	4:41:47
Site 009	raccoon	2018-11-15 05:57:21	2018-11-15	05:57:21	5:57:21
Site 009	raccoon	2018-11-16 23:13:34	2018-11-16	23:13:34	23:13:34
Site 009	raccoon	2018-11-16 23:21:07	2018-11-16	23:21:07	23:21:07
Site 009	raccoon	2018-11-16 23:31:48	2018-11-16	23:31:48	23:31:48
Site 009	raccoon	2018-11-17 00:05:34	2018-11-17	00:05:34	0:05:34
Site 009	raccoon	2018-11-17 03:52:07	2018-11-17	03:52:07	3:52:07
Site 009	raccoon	2018-11-24 03:29:02	2018-11-24	03:29:02	3:29:02
Site 009	raccoon	2018-11-24 07:42:06	2018-11-24	07:42:06	7:42:06
Site 009	raccoon	2018-11-25 00:35:53	2018-11-25	00:35:53	0:35:53
Site 009	raccoon	2018-12-12 00:51:11	2018-12-12	00:51:11	0:51:11
Site 009	raccoon	2018-12-12 02:09:10	2018-12-12	02:09:10	2:09:10
Site 009	raccoon	2018-12-12 03:12:23	2018-12-12	03:12:23	3:12:23
Site 009	raccoon	2019-01-03 21:07:06	2019-01-03	21:07:06	21:07:06
Site 010	bobcat	2018-05-19 22:59:09	2018-05-19	22:59:09	22:59:09
Site 010	bobcat	2018-06-25 02:15:39	2018-06-25	02:15:39	2:15:39
Site 010	bobcat	2018-10-06 02:10:56	2018-10-06	02:10:56	2:10:56
Site 010	bobcat	2018-11-23 07:42:23	2018-11-23	07:42:23	7:42:23
Site 010	bobcat	2018-11-25 19:42:35	2018-11-25	19:42:35	19:42:35
Site 010	bobcat	2018-11-27 02:48:22	2018-11-27	02:48:22	2:48:22
Site 010	bobcat	2018-12-30 06:59:24	2018-12-30	06:59:24	6:59:24
Site 010	bobcat	2019-01-06 06:41:51	2019-01-06	06:41:51	6:41:51
Site 010	bobcat	2019-01-18 03:47:46	2019-01-18	03:47:46	3:47:46
Site 010	coyote	2018-05-04 09:05:13	2018-05-04	09:05:13	9:05:13
Site 010	coyote	2018-05-17 17:28:32	2018-05-17	17:28:32	17:28:32
Site 010	coyote	2018-09-18 08:14:15	2018-09-18	08:14:15	8:14:15
Site 010	coyote	2018-09-18 23:04:50	2018-09-18	23:04:50	23:04:50
Site 010	coyote	2018-09-22 20:53:23	2018-09-22	20:53:23	20:53:23
Site 010	coyote	2018-09-22 21:01:45	2018-09-22	21:01:45	21:01:45
Site 010	coyote	2018-09-23 02:15:02	2018-09-23	02:15:02	2:15:02
Site 010	coyote	2018-09-23 02:55:21	2018-09-23	02:55:21	2:55:21
Site 010	coyote	2018-09-27 02:25:22	2018-09-27	02:25:22	2:25:22
Site 010	coyote	2018-09-27 04:35:05	2018-09-27	04:35:05	4:35:05
Site 010	coyote	2018-10-20 14:31:22	2018-10-20	14:31:22	14:31:22
Site 010	coyote	2018-10-20 14:37:17	2018-10-20	14:37:17	14:37:17
Site 010	coyote	2018-10-20 14:39:19	2018-10-20	14:39:19	14:39:19
Site 010	coyote	2018-10-22 09:22:19	2018-10-22	09:22:19	9:22:19
Site 010	coyote	2018-10-22 09:27:04	2018-10-22	09:27:04	9:27:04
Site 010	coyote	2018-10-25 03:54:42	2018-10-25	03:54:42	3:54:42
Site 010	opossum	2018-05-16 22:17:09	2018-05-16	22:17:09	22:17:09
Site 010	opossum	2018-07-08 23:37:54	2018-07-08	23:37:54	23:37:54
Site 010	opossum	2018-07-08 23:39:52	2018-07-08	23:39:52	23:39:52
Site 010	opossum	2018-07-08 23:48:08	2018-07-08	23:48:08	23:48:08
Site 010	opossum	2018-09-16 20:19:14	2018-09-16	20:19:14	20:19:14
Site 010	opossum	2018-09-18 01:30:05	2018-09-18	01:30:05	1:30:05
Site 010	opossum	2018-12-20 02:33:29	2018-12-20	02:33:29	2:33:29
Site 010	striped skunk	2018-06-10 23:35:48	2018-06-10	23:35:48	23:35:48
Site 010	striped skunk	2018-10-27 23:37:45	2018-10-27	23:37:45	23:37:45
Site 011	bobcat	2018-11-17 18:31:29	2018-11-17	18:31:29	18:31:29
Site 011	coyote	2018-05-31 02:55:17	2018-05-31	02:55:17	2:55:17
Site 011	coyote	2018-07-11 06:07:23	2018-07-11	06:07:23	6:07:23
Site 011	coyote	2018-07-16 06:46:28	2018-07-16	06:46:28	6:46:28
Site 011	coyote	2018-07-17 05:05:10	2018-07-17	05:05:10	5:05:10
Site 011	coyote	2018-07-20 00:59:13	2018-07-20	00:59:13	0:59:13
Site 011	coyote	2018-07-23 05:10:07	2018-07-23	05:10:07	5:10:07
Site 011	coyote	2018-08-02 03:36:08	2018-08-02	03:36:08	3:36:08
Site 011	coyote	2018-10-07 07:41:15	2018-10-07	07:41:15	7:41:15
Site 011	coyote	2018-10-17 11:58:12	2018-10-17	11:58:12	11:58:12
Site 011	coyote	2018-10-17 21:40:07	2018-10-17	21:40:07	21:40:07
Site 011	coyote	2018-10-17 23:06:12	2018-10-17	23:06:12	23:06:12
Site 011	coyote	2018-10-30 01:13:34	2018-10-30	01:13:34	1:13:34
Site 011	opossum	2018-05-31 23:40:34	2018-05-31	23:40:34	23:40:34
Site 011	opossum	2018-06-05 01:55:20	2018-06-05	01:55:20	1:55:20
Site 011	opossum	2018-06-11 02:16:48	2018-06-11	02:16:48	2:16:48
Site 011	opossum	2018-06-21 02:43:48	2018-06-21	02:43:48	2:43:48
Site 011	opossum	2018-06-28 01:56:52	2018-06-28	01:56:52	1:56:52
Site 011	opossum	2018-06-29 01:56:42	2018-06-29	01:56:42	1:56:42
Site 011	opossum	2018-06-30 00:43:54	2018-06-30	00:43:54	0:43:54
Site 011	opossum	2018-07-01 03:31:55	2018-07-01	03:31:55	3:31:55
Site 011	opossum	2018-07-02 00:31:14	2018-07-02	00:31:14	0:31:14
Site 011	opossum	2018-07-02 01:32:37	2018-07-02	01:32:37	1:32:37
Site 011	opossum	2018-07-05 03:39:03	2018-07-05	03:39:03	3:39:03
Site 011	opossum	2018-07-08 03:29:56	2018-07-08	03:29:56	3:29:56
Site 011	opossum	2018-07-09 04:22:35	2018-07-09	04:22:35	4:22:35
Site 011	opossum	2018-07-10 03:31:05	2018-07-10	03:31:05	3:31:05
Site 011	opossum	2018-07-12 04:23:01	2018-07-12	04:23:01	4:23:01
Site 011	opossum	2018-07-18 03:01:42	2018-07-18	03:01:42	3:01:42
Site 011	opossum	2018-07-20 23:55:21	2018-07-20	23:55:21	23:55:21
Site 011	opossum	2018-07-25 01:19:22	2018-07-25	01:19:22	1:19:22
Site 011	opossum	2018-07-25 02:40:08	2018-07-25	02:40:08	2:40:08
Site 011	opossum	2018-07-25 05:08:39	2018-07-25	05:08:39	5:08:39
Site 011	opossum	2018-07-26 02:07:37	2018-07-26	02:07:37	2:07:37
Site 011	opossum	2018-07-26 22:55:12	2018-07-26	22:55:12	22:55:12
Site 011	opossum	2018-07-27 02:33:22	2018-07-27	02:33:22	2:33:22
Site 011	opossum	2018-07-28 01:19:49	2018-07-28	01:19:49	1:19:49
Site 011	opossum	2018-07-28 01:38:43	2018-07-28	01:38:43	1:38:43
Site 011	opossum	2018-07-28 04:36:57	2018-07-28	04:36:57	4:36:57
Site 011	opossum	2018-07-29 01:52:08	2018-07-29	01:52:08	1:52:08
Site 011	opossum	2018-07-31 03:56:52	2018-07-31	03:56:52	3:56:52
Site 011	opossum	2018-08-03 23:00:10	2018-08-03	23:00:10	23:00:10
Site 011	opossum	2018-08-03 23:31:17	2018-08-03	23:31:17	23:31:17
Site 011	opossum	2018-08-07 23:18:24	2018-08-07	23:18:24	23:18:24
Site 011	opossum	2018-08-09 21:59:04	2018-08-09	21:59:04	21:59:04
Site 011	opossum	2018-08-11 00:59:57	2018-08-11	00:59:57	0:59:57
Site 011	opossum	2018-08-15 01:09:32	2018-08-15	01:09:32	1:09:32
Site 011	opossum	2018-08-15 01:12:39	2018-08-15	01:12:39	1:12:39
Site 011	opossum	2018-08-15 01:19:37	2018-08-15	01:19:37	1:19:37
Site 011	opossum	2018-08-22 20:58:49	2018-08-22	20:58:49	20:58:49
Site 011	opossum	2018-08-23 04:45:18	2018-08-23	04:45:18	4:45:18
Site 011	opossum	2018-08-23 20:22:56	2018-08-23	20:22:56	20:22:56
Site 011	opossum	2018-08-24 03:27:12	2018-08-24	03:27:12	3:27:12
Site 011	opossum	2018-08-26 03:45:52	2018-08-26	03:45:52	3:45:52
Site 011	opossum	2018-08-26 20:31:42	2018-08-26	20:31:42	20:31:42
Site 011	opossum	2018-08-28 03:04:06	2018-08-28	03:04:06	3:04:06
Site 011	opossum	2018-08-30 02:08:49	2018-08-30	02:08:49	2:08:49
Site 011	opossum	2018-09-01 21:17:39	2018-09-01	21:17:39	21:17:39
Site 011	opossum	2018-09-02 04:52:27	2018-09-02	04:52:27	4:52:27
Site 011	opossum	2018-09-02 21:53:28	2018-09-02	21:53:28	21:53:28
Site 011	opossum	2018-09-03 20:35:46	2018-09-03	20:35:46	20:35:46
Site 011	opossum	2018-09-04 03:45:59	2018-09-04	03:45:59	3:45:59
Site 011	opossum	2018-09-04 04:31:13	2018-09-04	04:31:13	4:31:13
Site 011	opossum	2018-09-04 21:25:06	2018-09-04	21:25:06	21:25:06
Site 011	opossum	2018-09-04 21:49:58	2018-09-04	21:49:58	21:49:58
Site 011	opossum	2018-09-05 00:48:37	2018-09-05	00:48:37	0:48:37
Site 011	opossum	2018-09-07 19:46:21	2018-09-07	19:46:21	19:46:21
Site 011	opossum	2018-09-08 01:34:13	2018-09-08	01:34:13	1:34:13
Site 011	opossum	2018-09-10 19:40:12	2018-09-10	19:40:12	19:40:12
Site 011	opossum	2018-09-11 03:17:44	2018-09-11	03:17:44	3:17:44
Site 011	opossum	2018-09-13 05:48:54	2018-09-13	05:48:54	5:48:54
Site 011	opossum	2018-09-13 05:51:53	2018-09-13	05:51:53	5:51:53
Site 011	opossum	2018-09-13 19:52:18	2018-09-13	19:52:18	19:52:18
Site 011	opossum	2018-09-13 20:15:53	2018-09-13	20:15:53	20:15:53
Site 011	opossum	2018-09-13 20:57:29	2018-09-13	20:57:29	20:57:29
Site 011	opossum	2018-09-14 04:04:36	2018-09-14	04:04:36	4:04:36
Site 011	opossum	2018-09-14 05:11:52	2018-09-14	05:11:52	5:11:52
Site 011	opossum	2018-09-14 05:22:42	2018-09-14	05:22:42	5:22:42
Site 011	opossum	2018-09-14 21:50:13	2018-09-14	21:50:13	21:50:13
Site 011	opossum	2018-09-14 23:30:09	2018-09-14	23:30:09	23:30:09
Site 011	opossum	2018-09-15 00:28:36	2018-09-15	00:28:36	0:28:36
Site 011	opossum	2018-09-15 20:34:14	2018-09-15	20:34:14	20:34:14
Site 011	opossum	2018-09-18 20:06:25	2018-09-18	20:06:25	20:06:25
Site 011	opossum	2018-09-19 19:40:43	2018-09-19	19:40:43	19:40:43
Site 011	opossum	2018-09-19 22:12:36	2018-09-19	22:12:36	22:12:36
Site 011	opossum	2018-09-20 03:18:11	2018-09-20	03:18:11	3:18:11
Site 011	opossum	2018-09-20 05:31:14	2018-09-20	05:31:14	5:31:14
Site 011	opossum	2018-09-23 21:40:51	2018-09-23	21:40:51	21:40:51
Site 011	opossum	2018-09-24 01:56:55	2018-09-24	01:56:55	1:56:55
Site 011	opossum	2018-09-24 02:04:05	2018-09-24	02:04:05	2:04:05
Site 011	opossum	2018-09-24 02:05:46	2018-09-24	02:05:46	2:05:46
Site 011	opossum	2018-09-25 20:53:37	2018-09-25	20:53:37	20:53:37
Site 011	opossum	2018-09-26 05:11:34	2018-09-26	05:11:34	5:11:34
Site 011	opossum	2018-09-26 05:17:31	2018-09-26	05:17:31	5:17:31
Site 011	opossum	2018-09-29 03:59:47	2018-09-29	03:59:47	3:59:47
Site 011	opossum	2018-09-29 04:43:00	2018-09-29	04:43:00	4:43:00
Site 011	opossum	2018-10-01 05:53:55	2018-10-01	05:53:55	5:53:55
Site 011	opossum	2018-10-02 04:11:45	2018-10-02	04:11:45	4:11:45
Site 011	opossum	2018-10-04 21:25:22	2018-10-04	21:25:22	21:25:22
Site 011	opossum	2018-10-05 22:35:13	2018-10-05	22:35:13	22:35:13
Site 011	opossum	2018-10-06 20:43:09	2018-10-06	20:43:09	20:43:09
Site 011	opossum	2018-10-06 21:50:15	2018-10-06	21:50:15	21:50:15
Site 011	opossum	2018-10-07 03:14:24	2018-10-07	03:14:24	3:14:24
Site 011	opossum	2018-10-09 02:49:48	2018-10-09	02:49:48	2:49:48
Site 011	opossum	2018-10-09 04:04:26	2018-10-09	04:04:26	4:04:26
Site 011	opossum	2018-10-10 03:52:55	2018-10-10	03:52:55	3:52:55
Site 011	opossum	2018-10-10 03:57:56	2018-10-10	03:57:56	3:57:56
Site 011	opossum	2018-10-10 04:01:36	2018-10-10	04:01:36	4:01:36
Site 011	opossum	2018-10-11 03:56:45	2018-10-11	03:56:45	3:56:45
Site 011	opossum	2018-10-12 00:52:52	2018-10-12	00:52:52	0:52:52
Site 011	opossum	2018-10-16 21:33:29	2018-10-16	21:33:29	21:33:29
Site 011	opossum	2018-10-21 22:06:05	2018-10-21	22:06:05	22:06:05
Site 011	opossum	2018-10-25 00:00:43	2018-10-25	00:00:43	0:00:43
Site 011	opossum	2018-10-26 04:49:32	2018-10-26	04:49:32	4:49:32
Site 011	opossum	2018-11-03 21:10:52	2018-11-03	21:10:52	21:10:52
Site 011	opossum	2018-11-06 04:36:05	2018-11-06	04:36:05	4:36:05
Site 011	opossum	2018-11-10 20:34:41	2018-11-10	20:34:41	20:34:41
Site 011	opossum	2018-11-10 20:51:26	2018-11-10	20:51:26	20:51:26
Site 011	opossum	2018-11-13 23:32:05	2018-11-13	23:32:05	23:32:05
Site 011	opossum	2018-11-17 21:29:10	2018-11-17	21:29:10	21:29:10
Site 011	opossum	2018-11-19 23:10:32	2018-11-19	23:10:32	23:10:32
Site 011	opossum	2018-11-19 23:37:17	2018-11-19	23:37:17	23:37:17
Site 011	opossum	2018-12-10 22:00:49	2018-12-10	22:00:49	22:00:49
Site 011	opossum	2018-12-12 00:57:10	2018-12-12	00:57:10	0:57:10
Site 011	opossum	2018-12-20 03:23:05	2018-12-20	03:23:05	3:23:05
Site 011	opossum	2018-12-24 02:30:03	2018-12-24	02:30:03	2:30:03
Site 011	opossum	2018-12-30 20:41:55	2018-12-30	20:41:55	20:41:55
Site 011	opossum	2019-01-17 20:17:58	2019-01-17	20:17:58	20:17:58
Site 011	opossum	2019-01-19 21:13:42	2019-01-19	21:13:42	21:13:42
Site 011	opossum	2019-01-25 01:33:05	2019-01-25	01:33:05	1:33:05
Site 011	raccoon	2018-05-20 21:04:40	2018-05-20	21:04:40	21:04:40
Site 011	raccoon	2018-05-20 21:56:54	2018-05-20	21:56:54	21:56:54
Site 011	raccoon	2018-05-21 12:13:44	2018-05-21	12:13:44	12:13:44
Site 011	raccoon	2018-05-22 21:48:11	2018-05-22	21:48:11	21:48:11
Site 011	raccoon	2018-05-22 21:50:11	2018-05-22	21:50:11	21:50:11
Site 011	raccoon	2018-05-24 02:29:28	2018-05-24	02:29:28	2:29:28
Site 011	raccoon	2018-05-24 22:08:31	2018-05-24	22:08:31	22:08:31
Site 011	raccoon	2018-05-26 00:45:27	2018-05-26	00:45:27	0:45:27
Site 011	raccoon	2018-05-26 04:47:04	2018-05-26	04:47:04	4:47:04
Site 011	raccoon	2018-05-26 05:14:24	2018-05-26	05:14:24	5:14:24
Site 011	raccoon	2018-05-26 05:37:37	2018-05-26	05:37:37	5:37:37
Site 011	raccoon	2018-05-26 06:27:43	2018-05-26	06:27:43	6:27:43
Site 011	raccoon	2018-05-26 06:30:53	2018-05-26	06:30:53	6:30:53
Site 011	raccoon	2018-05-26 23:39:44	2018-05-26	23:39:44	23:39:44
Site 011	raccoon	2018-05-27 22:51:26	2018-05-27	22:51:26	22:51:26
Site 011	raccoon	2018-05-28 21:49:07	2018-05-28	21:49:07	21:49:07
Site 011	raccoon	2018-05-29 00:18:21	2018-05-29	00:18:21	0:18:21
Site 011	raccoon	2018-05-31 06:30:40	2018-05-31	06:30:40	6:30:40
Site 011	raccoon	2018-06-01 05:16:58	2018-06-01	05:16:58	5:16:58
Site 011	raccoon	2018-06-07 21:41:13	2018-06-07	21:41:13	21:41:13
Site 011	raccoon	2018-06-09 12:19:51	2018-06-09	12:19:51	12:19:51
Site 011	raccoon	2018-06-12 03:40:51	2018-06-12	03:40:51	3:40:51
Site 011	raccoon	2018-06-12 04:01:51	2018-06-12	04:01:51	4:01:51
Site 011	raccoon	2018-06-12 21:37:39	2018-06-12	21:37:39	21:37:39
Site 011	raccoon	2018-06-13 21:57:53	2018-06-13	21:57:53	21:57:53
Site 011	raccoon	2018-06-15 16:45:29	2018-06-15	16:45:29	16:45:29
Site 011	raccoon	2018-06-15 21:37:51	2018-06-15	21:37:51	21:37:51
Site 011	raccoon	2018-06-16 02:20:52	2018-06-16	02:20:52	2:20:52
Site 011	raccoon	2018-06-19 00:26:23	2018-06-19	00:26:23	0:26:23
Site 011	raccoon	2018-06-21 21:29:56	2018-06-21	21:29:56	21:29:56
Site 011	raccoon	2018-06-23 22:02:05	2018-06-23	22:02:05	22:02:05
Site 011	raccoon	2018-06-30 04:47:33	2018-06-30	04:47:33	4:47:33
Site 011	raccoon	2018-06-30 22:28:09	2018-06-30	22:28:09	22:28:09
Site 011	raccoon	2018-07-05 03:31:19	2018-07-05	03:31:19	3:31:19
Site 011	raccoon	2018-07-06 05:26:15	2018-07-06	05:26:15	5:26:15
Site 011	raccoon	2018-07-09 13:18:01	2018-07-09	13:18:01	13:18:01
Site 011	raccoon	2018-07-09 21:20:41	2018-07-09	21:20:41	21:20:41
Site 011	raccoon	2018-07-12 23:54:00	2018-07-12	23:54:00	23:54:00
Site 011	raccoon	2018-07-15 02:44:57	2018-07-15	02:44:57	2:44:57
Site 011	raccoon	2018-07-17 00:15:51	2018-07-17	00:15:51	0:15:51
Site 011	raccoon	2018-07-18 03:11:38	2018-07-18	03:11:38	3:11:38
Site 011	raccoon	2018-07-18 04:37:27	2018-07-18	04:37:27	4:37:27
Site 011	raccoon	2018-07-18 23:56:05	2018-07-18	23:56:05	23:56:05
Site 011	raccoon	2018-07-20 03:53:07	2018-07-20	03:53:07	3:53:07
Site 011	raccoon	2018-07-22 01:42:21	2018-07-22	01:42:21	1:42:21
Site 011	raccoon	2018-07-22 03:40:33	2018-07-22	03:40:33	3:40:33
Site 011	raccoon	2018-07-22 04:13:02	2018-07-22	04:13:02	4:13:02
Site 011	raccoon	2018-07-24 03:22:47	2018-07-24	03:22:47	3:22:47
Site 011	raccoon	2018-07-25 04:28:42	2018-07-25	04:28:42	4:28:42
Site 011	raccoon	2018-07-27 01:07:47	2018-07-27	01:07:47	1:07:47
Site 011	raccoon	2018-07-28 22:11:26	2018-07-28	22:11:26	22:11:26
Site 011	raccoon	2018-07-30 04:09:11	2018-07-30	04:09:11	4:09:11
Site 011	raccoon	2018-08-04 22:39:38	2018-08-04	22:39:38	22:39:38
Site 011	raccoon	2018-08-06 01:38:36	2018-08-06	01:38:36	1:38:36
Site 011	raccoon	2018-08-06 01:39:34	2018-08-06	01:39:34	1:39:34
Site 011	raccoon	2018-08-06 04:42:35	2018-08-06	04:42:35	4:42:35
Site 011	raccoon	2018-08-07 00:35:33	2018-08-07	00:35:33	0:35:33
Site 011	raccoon	2018-08-10 02:41:21	2018-08-10	02:41:21	2:41:21
Site 011	raccoon	2018-08-15 04:05:42	2018-08-15	04:05:42	4:05:42
Site 011	raccoon	2018-08-16 06:24:45	2018-08-16	06:24:45	6:24:45
Site 011	raccoon	2018-08-16 20:37:13	2018-08-16	20:37:13	20:37:13
Site 011	raccoon	2018-08-18 03:44:56	2018-08-18	03:44:56	3:44:56
[truncated: 11,125 more rows]

## Sheet: photodatatable_2019.02.11
Station	Species	DateTimeOriginal	Date	Time	Hour
Site 001	domestic cat	2018-04-18 14:36:14	2018-04-18	14:36:14	14:36:14
Site 001	domestic cat	2018-04-18 14:36:24	2018-04-18	14:36:24	14:36:24
Site 001	domestic cat	2018-04-20 18:04:55	2018-04-20	18:04:55	18:04:55
Site 002	black-tailed deer	2018-04-20 20:22:51	2018-04-20	20:22:51	20:22:51
Site 002	black-tailed deer	2018-04-20 20:22:52	2018-04-20	20:22:52	20:22:52
Site 002	black-tailed deer	2018-04-22 19:49:53	2018-04-22	19:49:53	19:49:53
Site 002	black-tailed deer	2018-04-24 07:16:25	2018-04-24	07:16:25	7:16:25
Site 002	black-tailed deer	2018-04-24 07:17:41	2018-04-24	07:17:41	7:17:41
Site 002	black-tailed deer	2018-04-25 04:43:06	2018-04-25	04:43:06	4:43:06
Site 002	black-tailed deer	2018-04-25 04:46:11	2018-04-25	04:46:11	4:46:11
Site 002	black-tailed deer	2018-04-25 20:51:07	2018-04-25	20:51:07	20:51:07
Site 002	black-tailed deer	2018-04-25 20:51:41	2018-04-25	20:51:41	20:51:41
Site 002	black-tailed deer	2018-04-27 04:25:24	2018-04-27	04:25:24	4:25:24
Site 002	black-tailed deer	2018-04-27 04:26:36	2018-04-27	04:26:36	4:26:36
Site 002	black-tailed deer	2018-04-27 08:28:46	2018-04-27	08:28:46	8:28:46
Site 002	black-tailed deer	2018-04-27 08:31:05	2018-04-27	08:31:05	8:31:05
Site 002	black-tailed deer	2018-04-28 04:58:58	2018-04-28	04:58:58	4:58:58
Site 002	black-tailed deer	2018-04-28 04:59:29	2018-04-28	04:59:29	4:59:29
Site 002	black-tailed deer	2018-04-28 07:37:02	2018-04-28	07:37:02	7:37:02
Site 002	black-tailed deer	2018-04-28 10:32:23	2018-04-28	10:32:23	10:32:23
Site 002	black-tailed deer	2018-04-28 10:53:03	2018-04-28	10:53:03	10:53:03
Site 002	black-tailed deer	2018-04-28 13:02:33	2018-04-28	13:02:33	13:02:33
Site 002	black-tailed deer	2018-04-28 13:02:44	2018-04-28	13:02:44	13:02:44
Site 002	black-tailed deer	2018-04-29 04:52:05	2018-04-29	04:52:05	4:52:05
Site 002	black-tailed deer	2018-04-29 08:57:22	2018-04-29	08:57:22	8:57:22
Site 002	black-tailed deer	2018-04-30 06:32:32	2018-04-30	06:32:32	6:32:32
Site 002	black-tailed deer	2018-04-30 06:34:12	2018-04-30	06:34:12	6:34:12
Site 002	black-tailed deer	2018-04-30 10:04:06	2018-04-30	10:04:06	10:04:06
Site 002	black-tailed deer	2018-04-30 10:04:33	2018-04-30	10:04:33	10:04:33
Site 002	black-tailed deer	2018-04-30 10:05:18	2018-04-30	10:05:18	10:05:18
Site 002	black-tailed deer	2018-05-02 02:19:54	2018-05-02	02:19:54	2:19:54
Site 002	black-tailed deer	2018-05-02 02:19:56	2018-05-02	02:19:56	2:19:56
Site 002	black-tailed deer	2018-05-02 06:25:18	2018-05-02	06:25:18	6:25:18
Site 002	black-tailed deer	2018-05-02 07:11:27	2018-05-02	07:11:27	7:11:27
Site 002	black-tailed deer	2018-05-02 11:32:39	2018-05-02	11:32:39	11:32:39
Site 002	black-tailed deer	2018-05-02 11:33:16	2018-05-02	11:33:16	11:33:16
Site 002	black-tailed deer	2018-05-03 08:56:24	2018-05-03	08:56:24	8:56:24
Site 002	black-tailed deer	2018-05-03 08:56:42	2018-05-03	08:56:42	8:56:42
Site 002	black-tailed deer	2018-05-03 13:43:45	2018-05-03	13:43:45	13:43:45
Site 002	black-tailed deer	2018-05-04 05:11:05	2018-05-04	05:11:05	5:11:05
Site 002	black-tailed deer	2018-05-04 05:11:16	2018-05-04	05:11:16	5:11:16
Site 002	black-tailed deer	2018-05-04 05:41:16	2018-05-04	05:41:16	5:41:16
Site 002	black-tailed deer	2018-05-04 06:04:21	2018-05-04	06:04:21	6:04:21
Site 002	black-tailed deer	2018-05-04 06:07:28	2018-05-04	06:07:28	6:07:28
Site 002	black-tailed deer	2018-05-04 08:11:08	2018-05-04	08:11:08	8:11:08
Site 002	black-tailed deer	2018-05-04 08:12:23	2018-05-04	08:12:23	8:12:23
Site 002	black-tailed deer	2018-05-05 05:33:36	2018-05-05	05:33:36	5:33:36
Site 002	black-tailed deer	2018-05-05 17:47:54	2018-05-05	17:47:54	17:47:54
Site 002	black-tailed deer	2018-05-05 19:01:05	2018-05-05	19:01:05	19:01:05
Site 002	black-tailed deer	2018-05-05 19:17:40	2018-05-05	19:17:40	19:17:40
Site 002	black-tailed deer	2018-05-05 21:35:07	2018-05-05	21:35:07	21:35:07
Site 002	black-tailed deer	2018-05-05 21:37:05	2018-05-05	21:37:05	21:37:05
Site 002	black-tailed deer	2018-05-05 21:37:20	2018-05-05	21:37:20	21:37:20
Site 002	black-tailed deer	2018-05-06 04:52:36	2018-05-06	04:52:36	4:52:36
Site 002	black-tailed deer	2018-05-06 19:25:36	2018-05-06	19:25:36	19:25:36
Site 002	black-tailed deer	2018-05-07 00:39:27	2018-05-07	00:39:27	0:39:27
Site 002	black-tailed deer	2018-05-07 03:39:18	2018-05-07	03:39:18	3:39:18
Site 002	black-tailed deer	2018-05-08 06:24:46	2018-05-08	06:24:46	6:24:46
Site 002	black-tailed deer	2018-05-08 06:27:29	2018-05-08	06:27:29	6:27:29
Site 002	black-tailed deer	2018-05-08 06:28:01	2018-05-08	06:28:01	6:28:01
Site 002	black-tailed deer	2018-05-08 07:45:18	2018-05-08	07:45:18	7:45:18
Site 002	black-tailed deer	2018-05-08 07:45:30	2018-05-08	07:45:30	7:45:30
Site 002	black-tailed deer	2018-05-08 07:45:41	2018-05-08	07:45:41	7:45:41
Site 002	black-tailed deer	2018-05-08 07:46:38	2018-05-08	07:46:38	7:46:38
Site 002	black-tailed deer	2018-05-08 10:46:15	2018-05-08	10:46:15	10:46:15
Site 002	black-tailed deer	2018-05-08 10:46:58	2018-05-08	10:46:58	10:46:58
Site 002	black-tailed deer	2018-05-08 10:47:26	2018-05-08	10:47:26	10:47:26
Site 002	black-tailed deer	2018-05-08 13:49:25	2018-05-08	13:49:25	13:49:25
Site 002	black-tailed deer	2018-05-09 04:23:16	2018-05-09	04:23:16	4:23:16
Site 002	black-tailed deer	2018-05-09 04:28:05	2018-05-09	04:28:05	4:28:05
Site 002	black-tailed deer	2018-05-09 04:28:15	2018-05-09	04:28:15	4:28:15
Site 002	black-tailed deer	2018-05-09 04:28:21	2018-05-09	04:28:21	4:28:21
Site 002	black-tailed deer	2018-05-09 20:41:06	2018-05-09	20:41:06	20:41:06
Site 002	black-tailed deer	2018-05-09 22:42:30	2018-05-09	22:42:30	22:42:30
Site 002	black-tailed deer	2018-05-10 08:01:50	2018-05-10	08:01:50	8:01:50
Site 002	black-tailed deer	2018-05-10 08:21:42	2018-05-10	08:21:42	8:21:42
Site 002	black-tailed deer	2018-05-10 08:26:17	2018-05-10	08:26:17	8:26:17
Site 002	black-tailed deer	2018-05-11 20:44:21	2018-05-11	20:44:21	20:44:21
Site 002	black-tailed deer	2018-05-11 22:34:01	2018-05-11	22:34:01	22:34:01
Site 002	black-tailed deer	2018-05-13 06:46:09	2018-05-13	06:46:09	6:46:09
Site 002	black-tailed deer	2018-05-13 06:49:54	2018-05-13	06:49:54	6:49:54
Site 002	black-tailed deer	2018-05-13 19:32:04	2018-05-13	19:32:04	19:32:04
Site 002	black-tailed deer	2018-05-13 19:32:42	2018-05-13	19:32:42	19:32:42
Site 002	black-tailed deer	2018-05-14 03:32:05	2018-05-14	03:32:05	3:32:05
Site 002	black-tailed deer	2018-05-14 06:57:17	2018-05-14	06:57:17	6:57:17
Site 002	black-tailed deer	2018-05-14 07:02:32	2018-05-14	07:02:32	7:02:32
Site 002	black-tailed deer	2018-05-14 07:05:51	2018-05-14	07:05:51	7:05:51
Site 002	black-tailed deer	2018-05-14 07:07:56	2018-05-14	07:07:56	7:07:56
Site 002	black-tailed deer	2018-05-15 06:04:52	2018-05-15	06:04:52	6:04:52
Site 002	black-tailed deer	2018-05-15 06:05:41	2018-05-15	06:05:41	6:05:41
Site 002	black-tailed deer	2018-05-15 07:55:55	2018-05-15	07:55:55	7:55:55
Site 002	black-tailed deer	2018-05-15 07:56:14	2018-05-15	07:56:14	7:56:14
Site 002	black-tailed deer	2018-05-15 07:56:24	2018-05-15	07:56:24	7:56:24
Site 002	black-tailed deer	2018-05-15 08:10:35	2018-05-15	08:10:35	8:10:35
Site 002	black-tailed deer	2018-05-15 09:22:36	2018-05-15	09:22:36	9:22:36
Site 002	black-tailed deer	2018-05-15 09:24:26	2018-05-15	09:24:26	9:24:26
Site 002	black-tailed deer	2018-05-15 09:25:10	2018-05-15	09:25:10	9:25:10
Site 002	black-tailed deer	2018-05-15 13:17:56	2018-05-15	13:17:56	13:17:56
Site 002	black-tailed deer	2018-05-16 07:11:26	2018-05-16	07:11:26	7:11:26
Site 002	black-tailed deer	2018-05-16 07:33:16	2018-05-16	07:33:16	7:33:16
Site 002	black-tailed deer	2018-05-16 10:10:33	2018-05-16	10:10:33	10:10:33
Site 002	black-tailed deer	2018-05-16 10:11:33	2018-05-16	10:11:33	10:11:33
Site 002	black-tailed deer	2018-05-16 10:12:08	2018-05-16	10:12:08	10:12:08
Site 002	black-tailed deer	2018-05-16 10:15:04	2018-05-16	10:15:04	10:15:04
Site 002	black-tailed deer	2018-05-16 10:42:27	2018-05-16	10:42:27	10:42:27
Site 002	black-tailed deer	2018-05-16 18:32:51	2018-05-16	18:32:51	18:32:51
Site 002	black-tailed deer	2018-05-16 18:39:25	2018-05-16	18:39:25	18:39:25
Site 002	black-tailed deer	2018-05-17 06:11:36	2018-05-17	06:11:36	6:11:36
Site 002	black-tailed deer	2018-05-17 06:11:50	2018-05-17	06:11:50	6:11:50
Site 002	black-tailed deer	2018-05-18 05:29:10	2018-05-18	05:29:10	5:29:10
Site 002	black-tailed deer	2018-05-18 16:21:01	2018-05-18	16:21:01	16:21:01
Site 002	black-tailed deer	2018-05-19 04:36:49	2018-05-19	04:36:49	4:36:49
Site 002	black-tailed deer	2018-05-19 07:39:34	2018-05-19	07:39:34	7:39:34
Site 002	black-tailed deer	2018-05-19 09:36:48	2018-05-19	09:36:48	9:36:48
Site 002	black-tailed deer	2018-05-19 12:43:40	2018-05-19	12:43:40	12:43:40
Site 002	black-tailed deer	2018-05-19 21:59:05	2018-05-19	21:59:05	21:59:05
Site 002	black-tailed deer	2018-05-20 03:48:45	2018-05-20	03:48:45	3:48:45
Site 002	black-tailed deer	2018-05-20 08:24:52	2018-05-20	08:24:52	8:24:52
Site 002	black-tailed deer	2018-05-20 08:26:30	2018-05-20	08:26:30	8:26:30
Site 002	black-tailed deer	2018-05-20 08:27:01	2018-05-20	08:27:01	8:27:01
Site 002	black-tailed deer	2018-05-20 08:48:40	2018-05-20	08:48:40	8:48:40
Site 002	black-tailed deer	2018-05-20 22:39:39	2018-05-20	22:39:39	22:39:39
Site 002	black-tailed deer	2018-05-20 22:41:11	2018-05-20	22:41:11	22:41:11
Site 002	black-tailed deer	2018-05-23 04:55:57	2018-05-23	04:55:57	4:55:57
Site 002	black-tailed deer	2018-05-23 19:18:54	2018-05-23	19:18:54	19:18:54
Site 002	black-tailed deer	2018-05-23 20:25:46	2018-05-23	20:25:46	20:25:46
Site 002	black-tailed deer	2018-05-23 20:33:43	2018-05-23	20:33:43	20:33:43
Site 002	black-tailed deer	2018-05-24 04:18:47	2018-05-24	04:18:47	4:18:47
Site 002	black-tailed deer	2018-05-24 04:35:05	2018-05-24	04:35:05	4:35:05
Site 002	black-tailed deer	2018-05-24 06:29:01	2018-05-24	06:29:01	6:29:01
Site 002	black-tailed deer	2018-05-24 06:56:11	2018-05-24	06:56:11	6:56:11
Site 002	black-tailed deer	2018-05-25 03:45:47	2018-05-25	03:45:47	3:45:47
Site 002	black-tailed deer	2018-05-25 04:31:43	2018-05-25	04:31:43	4:31:43
Site 002	black-tailed deer	2018-05-25 04:36:22	2018-05-25	04:36:22	4:36:22
Site 002	black-tailed deer	2018-05-25 06:33:16	2018-05-25	06:33:16	6:33:16
Site 002	black-tailed deer	2018-05-25 13:55:28	2018-05-25	13:55:28	13:55:28
Site 002	black-tailed deer	2018-05-25 13:55:37	2018-05-25	13:55:37	13:55:37
Site 002	black-tailed deer	2018-05-25 14:54:43	2018-05-25	14:54:43	14:54:43
Site 002	black-tailed deer	2018-05-25 15:03:30	2018-05-25	15:03:30	15:03:30
Site 002	black-tailed deer	2018-05-25 16:52:10	2018-05-25	16:52:10	16:52:10
Site 002	black-tailed deer	2018-05-25 16:52:49	2018-05-25	16:52:49	16:52:49
Site 002	black-tailed deer	2018-05-25 18:08:51	2018-05-25	18:08:51	18:08:51
Site 002	black-tailed deer	2018-05-25 18:09:03	2018-05-25	18:09:03	18:09:03
Site 002	black-tailed deer	2018-05-26 05:31:58	2018-05-26	05:31:58	5:31:58
Site 002	black-tailed deer	2018-05-26 05:32:14	2018-05-26	05:32:14	5:32:14
Site 002	black-tailed deer	2018-05-26 05:35:31	2018-05-26	05:35:31	5:35:31
Site 002	black-tailed deer	2018-05-26 05:36:00	2018-05-26	05:36:00	5:36:00
Site 002	black-tailed deer	2018-05-26 05:37:10	2018-05-26	05:37:10	5:37:10
Site 002	black-tailed deer	2018-05-26 06:10:21	2018-05-26	06:10:21	6:10:21
Site 002	black-tailed deer	2018-05-26 06:10:51	2018-05-26	06:10:51	6:10:51
Site 002	black-tailed deer	2018-05-27 06:00:22	2018-05-27	06:00:22	6:00:22
Site 002	black-tailed deer	2018-05-27 06:01:44	2018-05-27	06:01:44	6:01:44
Site 002	black-tailed deer	2018-05-27 07:13:52	2018-05-27	07:13:52	7:13:52
Site 002	black-tailed deer	2018-05-28 19:25:45	2018-05-28	19:25:45	19:25:45
Site 002	black-tailed deer	2018-05-29 06:28:08	2018-05-29	06:28:08	6:28:08
Site 002	black-tailed deer	2018-05-29 06:28:35	2018-05-29	06:28:35	6:28:35
Site 002	black-tailed deer	2018-05-29 20:41:05	2018-05-29	20:41:05	20:41:05
Site 002	black-tailed deer	2018-05-30 23:12:57	2018-05-30	23:12:57	23:12:57
Site 002	black-tailed deer	2018-06-01 05:49:15	2018-06-01	05:49:15	5:49:15
Site 002	black-tailed deer	2018-06-01 05:56:24	2018-06-01	05:56:24	5:56:24
Site 002	black-tailed deer	2018-06-02 05:05:52	2018-06-02	05:05:52	5:05:52
Site 002	black-tailed deer	2018-06-02 06:31:52	2018-06-02	06:31:52	6:31:52
Site 002	black-tailed deer	2018-06-03 06:01:08	2018-06-03	06:01:08	6:01:08
Site 002	black-tailed deer	2018-06-03 06:14:56	2018-06-03	06:14:56	6:14:56
Site 002	black-tailed deer	2018-06-03 06:23:25	2018-06-03	06:23:25	6:23:25
Site 002	black-tailed deer	2018-06-04 06:30:33	2018-06-04	06:30:33	6:30:33
Site 002	black-tailed deer	2018-06-04 06:30:41	2018-06-04	06:30:41	6:30:41
Site 002	black-tailed deer	2018-06-04 06:30:50	2018-06-04	06:30:50	6:30:50
Site 002	black-tailed deer	2018-06-04 06:31:06	2018-06-04	06:31:06	6:31:06
Site 002	black-tailed deer	2018-06-05 00:22:26	2018-06-05	00:22:26	0:22:26
Site 002	black-tailed deer	2018-06-05 00:33:09	2018-06-05	00:33:09	0:33:09
Site 002	black-tailed deer	2018-06-05 05:00:15	2018-06-05	05:00:15	5:00:15
Site 002	black-tailed deer	2018-06-05 06:27:45	2018-06-05	06:27:45	6:27:45
Site 002	black-tailed deer	2018-06-05 06:28:03	2018-06-05	06:28:03	6:28:03
Site 002	black-tailed deer	2018-06-06 05:03:32	2018-06-06	05:03:32	5:03:32
Site 002	black-tailed deer	2018-06-06 06:23:59	2018-06-06	06:23:59	6:23:59
Site 002	black-tailed deer	2018-06-06 06:48:23	2018-06-06	06:48:23	6:48:23
Site 002	black-tailed deer	2018-06-06 07:48:37	2018-06-06	07:48:37	7:48:37
Site 002	black-tailed deer	2018-06-06 18:16:08	2018-06-06	18:16:08	18:16:08
Site 002	black-tailed deer	2018-06-06 18:57:49	2018-06-06	18:57:49	18:57:49
Site 002	black-tailed deer	2018-06-06 19:28:10	2018-06-06	19:28:10	19:28:10
Site 002	black-tailed deer	2018-06-07 04:58:23	2018-06-07	04:58:23	4:58:23
Site 002	black-tailed deer	2018-06-07 04:58:38	2018-06-07	04:58:38	4:58:38
Site 002	black-tailed deer	2018-06-07 07:29:38	2018-06-07	07:29:38	7:29:38
Site 002	black-tailed deer	2018-06-07 10:43:34	2018-06-07	10:43:34	10:43:34
Site 002	black-tailed deer	2018-06-08 06:23:30	2018-06-08	06:23:30	6:23:30
Site 002	black-tailed deer	2018-06-08 07:12:08	2018-06-08	07:12:08	7:12:08
Site 002	black-tailed deer	2018-06-08 07:32:21	2018-06-08	07:32:21	7:32:21
Site 002	black-tailed deer	2018-06-08 07:50:29	2018-06-08	07:50:29	7:50:29
Site 002	black-tailed deer	2018-06-08 10:42:25	2018-06-08	10:42:25	10:42:25
Site 002	black-tailed deer	2018-06-09 05:30:23	2018-06-09	05:30:23	5:30:23
Site 002	black-tailed deer	2018-06-10 05:58:21	2018-06-10	05:58:21	5:58:21
Site 002	black-tailed deer	2018-06-10 07:44:49	2018-06-10	07:44:49	7:44:49
Site 002	black-tailed deer	2018-06-10 15:54:27	2018-06-10	15:54:27	15:54:27
Site 002	black-tailed deer	2018-06-13 06:21:47	2018-06-13	06:21:47	6:21:47
Site 002	black-tailed deer	2018-06-13 06:24:19	2018-06-13	06:24:19	6:24:19
Site 002	black-tailed deer	2018-06-13 16:56:07	2018-06-13	16:56:07	16:56:07
Site 002	black-tailed deer	2018-06-13 17:11:18	2018-06-13	17:11:18	17:11:18
Site 002	black-tailed deer	2018-06-14 03:51:34	2018-06-14	03:51:34	3:51:34
Site 002	black-tailed deer	2018-06-14 19:32:19	2018-06-14	19:32:19	19:32:19
Site 002	black-tailed deer	2018-06-15 07:19:14	2018-06-15	07:19:14	7:19:14
Site 002	black-tailed deer	2018-06-15 07:26:20	2018-06-15	07:26:20	7:26:20
Site 002	black-tailed deer	2018-06-15 10:37:22	2018-06-15	10:37:22	10:37:22
Site 002	black-tailed deer	2018-06-15 10:38:16	2018-06-15	10:38:16	10:38:16
Site 002	black-tailed deer	2018-06-15 20:13:22	2018-06-15	20:13:22	20:13:22
Site 002	black-tailed deer	2018-06-16 03:56:40	2018-06-16	03:56:40	3:56:40
Site 002	black-tailed deer	2018-06-19 04:46:08	2018-06-19	04:46:08	4:46:08
Site 002	black-tailed deer	2018-06-20 19:49:24	2018-06-20	19:49:24	19:49:24
Site 002	black-tailed deer	2018-06-20 23:37:59	2018-06-20	23:37:59	23:37:59
Site 002	black-tailed deer	2018-06-20 23:38:24	2018-06-20	23:38:24	23:38:24
Site 002	black-tailed deer	2018-06-21 04:21:44	2018-06-21	04:21:44	4:21:44
Site 002	black-tailed deer	2018-06-21 09:56:25	2018-06-21	09:56:25	9:56:25
Site 002	black-tailed deer	2018-06-21 09:59:23	2018-06-21	09:59:23	9:59:23
Site 002	black-tailed deer	2018-06-21 10:10:40	2018-06-21	10:10:40	10:10:40
Site 002	black-tailed deer	2018-06-22 04:32:09	2018-06-22	04:32:09	4:32:09
Site 002	black-tailed deer	2018-06-22 05:46:21	2018-06-22	05:46:21	5:46:21
Site 002	black-tailed deer	2018-06-22 05:47:29	2018-06-22	05:47:29	5:47:29
Site 002	black-tailed deer	2018-06-22 05:47:35	2018-06-22	05:47:35	5:47:35
Site 002	black-tailed deer	2018-06-22 08:39:50	2018-06-22	08:39:50	8:39:50
Site 002	black-tailed deer	2018-06-22 11:30:12	2018-06-22	11:30:12	11:30:12
Site 002	black-tailed deer	2018-06-24 17:23:05	2018-06-24	17:23:05	17:23:05
Site 002	black-tailed deer	2018-06-24 18:20:15	2018-06-24	18:20:15	18:20:15
Site 002	black-tailed deer	2018-06-24 19:01:31	2018-06-24	19:01:31	19:01:31
Site 002	black-tailed deer	2018-06-25 09:08:29	2018-06-25	09:08:29	9:08:29
Site 002	black-tailed deer	2018-06-25 19:31:44	2018-06-25	19:31:44	19:31:44
Site 002	black-tailed deer	2018-06-26 04:05:02	2018-06-26	04:05:02	4:05:02
Site 002	black-tailed deer	2018-06-26 21:09:33	2018-06-26	21:09:33	21:09:33
Site 002	black-tailed deer	2018-06-27 05:14:41	2018-06-27	05:14:41	5:14:41
Site 002	black-tailed deer	2018-06-28 03:20:57	2018-06-28	03:20:57	3:20:57
Site 002	black-tailed deer	2018-06-28 07:01:25	2018-06-28	07:01:25	7:01:25
Site 002	black-tailed deer	2018-06-28 07:01:38	2018-06-28	07:01:38	7:01:38
Site 002	black-tailed deer	2018-06-28 19:18:27	2018-06-28	19:18:27	19:18:27
Site 002	black-tailed deer	2018-06-29 05:05:11	2018-06-29	05:05:11	5:05:11
Site 002	black-tailed deer	2018-06-29 20:33:17	2018-06-29	20:33:17	20:33:17
Site 002	black-tailed deer	2018-06-30 04:40:20	2018-06-30	04:40:20	4:40:20
Site 002	black-tailed deer	2018-06-30 19:44:24	2018-06-30	19:44:24	19:44:24
Site 002	black-tailed deer	2018-06-30 19:44:50	2018-06-30	19:44:50	19:44:50
Site 002	black-tailed deer	2018-07-01 19:37:59	2018-07-01	19:37:59	19:37:59
Site 002	black-tailed deer	2018-07-02 20:38:32	2018-07-02	20:38:32	20:38:32
Site 002	black-tailed deer	2018-07-03 22:19:00	2018-07-03	22:19:00	22:19:00
Site 002	black-tailed deer	2018-07-03 22:23:18	2018-07-03	22:23:18	22:23:18
Site 002	black-tailed deer	2018-07-04 00:05:41	2018-07-04	00:05:41	0:05:41
Site 002	black-tailed deer	2018-07-04 01:15:14	2018-07-04	01:15:14	1:15:14
Site 002	black-tailed deer	2018-07-04 05:17:50	2018-07-04	05:17:50	5:17:50
Site 002	black-tailed deer	2018-07-04 07:46:40	2018-07-04	07:46:40	7:46:40
Site 002	black-tailed deer	2018-07-05 04:08:33	2018-07-05	04:08:33	4:08:33
Site 002	black-tailed deer	2018-07-05 04:10:19	2018-07-05	04:10:19	4:10:19
Site 002	black-tailed deer	2018-07-05 06:09:12	2018-07-05	06:09:12	6:09:12
Site 002	black-tailed deer	2018-07-05 07:27:30	2018-07-05	07:27:30	7:27:30
Site 002	black-tailed deer	2018-07-05 16:00:50	2018-07-05	16:00:50	16:00:50
Site 002	black-tailed deer	2018-07-05 16:01:08	2018-07-05	16:01:08	16:01:08
Site 002	black-tailed deer	2018-07-05 19:00:48	2018-07-05	19:00:48	19:00:48
Site 002	black-tailed deer	2018-07-05 19:02:56	2018-07-05	19:02:56	19:02:56
Site 002	black-tailed deer	2018-07-05 19:03:35	2018-07-05	19:03:35	19:03:35
Site 002	black-tailed deer	2018-07-05 19:38:12	2018-07-05	19:38:12	19:38:12
Site 002	black-tailed deer	2018-07-06 04:49:58	2018-07-06	04:49:58	4:49:58
Site 002	black-tailed deer	2018-07-06 04:51:27	2018-07-06	04:51:27	4:51:27
Site 002	black-tailed deer	2018-07-06 19:10:00	2018-07-06	19:10:00	19:10:00
Site 002	black-tailed deer	2018-07-06 20:55:38	2018-07-06	20:55:38	20:55:38
Site 002	black-tailed deer	2018-07-07 19:19:02	2018-07-07	19:19:02	19:19:02
Site 002	black-tailed deer	2018-07-07 19:20:03	2018-07-07	19:20:03	19:20:03
Site 002	black-tailed deer	2018-07-07 19:22:46	2018-07-07	19:22:46	19:22:46
Site 002	black-tailed deer	2018-07-08 07:42:16	2018-07-08	07:42:16	7:42:16
Site 002	black-tailed deer	2018-07-08 07:43:04	2018-07-08	07:43:04	7:43:04
Site 002	black-tailed deer	2018-07-08 14:06:37	2018-07-08	14:06:37	14:06:37
Site 002	black-tailed deer	2018-07-08 18:24:17	2018-07-08	18:24:17	18:24:17
Site 002	black-tailed deer	2018-07-08 18:30:55	2018-07-08	18:30:55	18:30:55
Site 002	black-tailed deer	2018-07-09 05:04:05	2018-07-09	05:04:05	5:04:05
Site 002	black-tailed deer	2018-07-09 05:04:06	2018-07-09	05:04:06	5:04:06
Site 002	black-tailed deer	2018-07-09 05:27:59	2018-07-09	05:27:59	5:27:59
Site 002	black-tailed deer	2018-07-09 11:46:30	2018-07-09	11:46:30	11:46:30
Site 002	black-tailed deer	2018-07-09 16:37:26	2018-07-09	16:37:26	16:37:26
Site 002	black-tailed deer	2018-07-09 19:24:04	2018-07-09	19:24:04	19:24:04
Site 002	black-tailed deer	2018-07-09 19:36:19	2018-07-09	19:36:19	19:36:19
Site 002	black-tailed deer	2018-07-10 07:04:14	2018-07-10	07:04:14	7:04:14
Site 002	black-tailed deer	2018-07-10 12:57:29	2018-07-10	12:57:29	12:57:29
Site 002	black-tailed deer	2018-07-11 05:00:06	2018-07-11	05:00:06	5:00:06
Site 002	black-tailed deer	2018-07-11 05:01:29	2018-07-11	05:01:29	5:01:29
Site 002	black-tailed deer	2018-07-11 05:46:31	2018-07-11	05:46:31	5:46:31
Site 002	black-tailed deer	2018-07-11 05:46:37	2018-07-11	05:46:37	5:46:37
Site 002	black-tailed deer	2018-07-11 05:53:06	2018-07-11	05:53:06	5:53:06
Site 002	black-tailed deer	2018-07-11 18:53:00	2018-07-11	18:53:00	18:53:00
Site 002	black-tailed deer	2018-07-12 17:23:08	2018-07-12	17:23:08	17:23:08
Site 002	black-tailed deer	2018-07-12 17:24:06	2018-07-12	17:24:06	17:24:06
Site 002	black-tailed deer	2018-07-12 18:14:51	2018-07-12	18:14:51	18:14:51
Site 002	black-tailed deer	2018-07-13 04:13:15	2018-07-13	04:13:15	4:13:15
Site 002	black-tailed deer	2018-07-13 04:59:18	2018-07-13	04:59:18	4:59:18
Site 002	black-tailed deer	2018-07-13 17:44:20	2018-07-13	17:44:20	17:44:20
Site 002	black-tailed deer	2018-07-13 17:49:17	2018-07-13	17:49:17	17:49:17
Site 002	black-tailed deer	2018-07-13 18:20:53	2018-07-13	18:20:53	18:20:53
Site 002	black-tailed deer	2018-07-13 19:09:50	2018-07-13	19:09:50	19:09:50
Site 002	black-tailed deer	2018-07-13 21:49:38	2018-07-13	21:49:38	21:49:38
Site 002	black-tailed deer	2018-07-14 04:42:33	2018-07-14	04:42:33	4:42:33
Site 002	black-tailed deer	2018-07-14 04:51:08	2018-07-14	04:51:08	4:51:08
Site 002	black-tailed deer	2018-07-14 04:56:36	2018-07-14	04:56:36	4:56:36
Site 002	black-tailed deer	2018-07-14 20:07:11	2018-07-14	20:07:11	20:07:11
Site 002	black-tailed deer	2018-07-14 20:07:16	2018-07-14	20:07:16	20:07:16
Site 002	black-tailed deer	2018-07-14 22:37:20	2018-07-14	22:37:20	22:37:20
Site 002	black-tailed deer	2018-07-14 22:40:26	2018-07-14	22:40:26	22:40:26
Site 002	black-tailed deer	2018-07-14 22:51:42	2018-07-14	22:51:42	22:51:42
Site 002	black-tailed deer	2018-07-14 22:53:07	2018-07-14	22:53:07	22:53:07
Site 002	black-tailed deer	2018-07-15 06:22:14	2018-07-15	06:22:14	6:22:14
Site 002	black-tailed deer	2018-07-15 06:41:52	2018-07-15	06:41:52	6:41:52
Site 002	black-tailed deer	2018-07-15 15:01:31	2018-07-15	15:01:31	15:01:31
Site 002	black-tailed deer	2018-07-15 15:13:01	2018-07-15	15:13:01	15:13:01
Site 002	black-tailed deer	2018-07-15 15:13:22	2018-07-15	15:13:22	15:13:22
Site 002	black-tailed deer	2018-07-15 15:32:56	2018-07-15	15:32:56	15:32:56
Site 002	black-tailed deer	2018-07-15 17:59:23	2018-07-15	17:59:23	17:59:23
Site 002	black-tailed deer	2018-07-15 17:59:39	2018-07-15	17:59:39	17:59:39
Site 002	black-tailed deer	2018-07-15 22:48:41	2018-07-15	22:48:41	22:48:41
Site 002	black-tailed deer	2018-07-16 00:44:46	2018-07-16	00:44:46	0:44:46
Site 002	black-tailed deer	2018-07-16 03:53:18	2018-07-16	03:53:18	3:53:18
Site 002	black-tailed deer	2018-07-16 03:54:03	2018-07-16	03:54:03	3:54:03
Site 002	black-tailed deer	2018-07-16 04:43:17	2018-07-16	04:43:17	4:43:17
Site 002	black-tailed deer	2018-07-16 04:50:58	2018-07-16	04:50:58	4:50:58
Site 002	black-tailed deer	2018-07-16 05:15:06	2018-07-16	05:15:06	5:15:06
Site 002	black-tailed deer	2018-07-16 05:54:36	2018-07-16	05:54:36	5:54:36
Site 002	black-tailed deer	2018-07-16 14:58:19	2018-07-16	14:58:19	14:58:19
Site 002	black-tailed deer	2018-07-16 20:15:00	2018-07-16	20:15:00	20:15:00
Site 002	black-tailed deer	2018-07-16 20:16:48	2018-07-16	20:16:48	20:16:48
Site 002	black-tailed deer	2018-07-20 07:29:11	2018-07-20	07:29:11	7:29:11
Site 002	black-tailed deer	2018-07-20 07:29:15	2018-07-20	07:29:15	7:29:15
Site 002	black-tailed deer	2018-07-20 07:29:30	2018-07-20	07:29:30	7:29:30
Site 002	black-tailed deer	2018-07-20 14:53:31	2018-07-20	14:53:31	14:53:31
Site 002	black-tailed deer	2018-07-20 14:53:32	2018-07-20	14:53:32	14:53:32
Site 002	black-tailed deer	2018-07-20 14:53:34	2018-07-20	14:53:34	14:53:34
Site 002	black-tailed deer	2018-07-20 14:53:37	2018-07-20	14:53:37	14:53:37
Site 002	black-tailed deer	2018-07-20 16:43:23	2018-07-20	16:43:23	16:43:23
Site 002	black-tailed deer	2018-07-20 17:46:21	2018-07-20	17:46:21	17:46:21
Site 002	black-tailed deer	2018-07-20 17:46:26	2018-07-20	17:46:26	17:46:26
Site 002	black-tailed deer	2018-07-20 17:46:38	2018-07-20	17:46:38	17:46:38
Site 002	black-tailed deer	2018-07-21 06:44:13	2018-07-21	06:44:13	6:44:13
Site 002	black-tailed deer	2018-07-21 06:44:17	2018-07-21	06:44:17	6:44:17
Site 002	black-tailed deer	2018-07-21 06:44:29	2018-07-21	06:44:29	6:44:29
Site 002	black-tailed deer	2018-07-21 06:44:35	2018-07-21	06:44:35	6:44:35
Site 002	black-tailed deer	2018-07-21 06:44:39	2018-07-21	06:44:39	6:44:39
Site 002	black-tailed deer	2018-07-21 06:44:43	2018-07-21	06:44:43	6:44:43
Site 002	black-tailed deer	2018-07-21 06:44:46	2018-07-21	06:44:46	6:44:46
Site 002	black-tailed deer	2018-07-21 06:44:50	2018-07-21	06:44:50	6:44:50
Site 002	black-tailed deer	2018-07-21 06:44:56	2018-07-21	06:44:56	6:44:56
Site 002	black-tailed deer	2018-07-21 06:44:59	2018-07-21	06:44:59	6:44:59
Site 002	black-tailed deer	2018-07-21 06:45:03	2018-07-21	06:45:03	6:45:03
Site 002	black-tailed deer	2018-07-21 06:45:06	2018-07-21	06:45:06	6:45:06
Site 002	black-tailed deer	2018-07-21 06:51:56	2018-07-21	06:51:56	6:51:56
Site 002	black-tailed deer	2018-07-21 06:52:01	2018-07-21	06:52:01	6:52:01
Site 002	black-tailed deer	2018-07-21 06:52:09	2018-07-21	06:52:09	6:52:09
Site 002	black-tailed deer	2018-07-21 06:56:27	2018-07-21	06:56:27	6:56:27
Site 002	black-tailed deer	2018-07-21 06:57:03	2018-07-21	06:57:03	6:57:03
Site 002	black-tailed deer	2018-07-21 06:57:15	2018-07-21	06:57:15	6:57:15
Site 002	black-tailed deer	2018-07-21 06:57:16	2018-07-21	06:57:16	6:57:16
Site 002	black-tailed deer	2018-07-21 06:57:54	2018-07-21	06:57:54	6:57:54
Site 002	black-tailed deer	2018-07-21 06:58:03	2018-07-21	06:58:03	6:58:03
Site 002	black-tailed deer	2018-07-21 07:08:02	2018-07-21	07:08:02	7:08:02
Site 002	black-tailed deer	2018-07-21 07:08:16	2018-07-21	07:08:16	7:08:16
Site 002	black-tailed deer	2018-07-21 11:28:42	2018-07-21	11:28:42	11:28:42
Site 002	black-tailed deer	2018-07-21 11:28:52	2018-07-21	11:28:52	11:28:52
Site 002	black-tailed deer	2018-07-21 11:29:24	2018-07-21	11:29:24	11:29:24
Site 002	black-tailed deer	2018-07-21 11:29:33	2018-07-21	11:29:33	11:29:33
Site 002	black-tailed deer	2018-07-21 11:30:29	2018-07-21	11:30:29	11:30:29
Site 002	black-tailed deer	2018-07-21 11:30:59	2018-07-21	11:30:59	11:30:59
Site 002	black-tailed deer	2018-07-21 11:31:42	2018-07-21	11:31:42	11:31:42
Site 002	black-tailed deer	2018-07-21 16:27:44	2018-07-21	16:27:44	16:27:44
Site 002	black-tailed deer	2018-07-21 16:28:23	2018-07-21	16:28:23	16:28:23
Site 002	black-tailed deer	2018-07-21 16:29:44	2018-07-21	16:29:44	16:29:44
Site 002	black-tailed deer	2018-07-21 16:38:35	2018-07-21	16:38:35	16:38:35
Site 002	black-tailed deer	2018-07-21 16:40:20	2018-07-21	16:40:20	16:40:20
Site 002	black-tailed deer	2018-07-22 08:10:46	2018-07-22	08:10:46	8:10:46
Site 002	black-tailed deer	2018-07-22 08:11:32	2018-07-22	08:11:32	8:11:32
Site 002	black-tailed deer	2018-07-22 08:19:11	2018-07-22	08:19:11	8:19:11
Site 002	black-tailed deer	2018-07-22 08:57:49	2018-07-22	08:57:49	8:57:49
Site 002	black-tailed deer	2018-07-22 08:57:53	2018-07-22	08:57:53	8:57:53
Site 002	black-tailed deer	2018-07-22 09:32:22	2018-07-22	09:32:22	9:32:22
Site 002	black-tailed deer	2018-07-22 11:57:32	2018-07-22	11:57:32	11:57:32
Site 002	black-tailed deer	2018-07-22 18:41:55	2018-07-22	18:41:55	18:41:55
Site 002	black-tailed deer	2018-07-22 18:43:34	2018-07-22	18:43:34	18:43:34
Site 002	black-tailed deer	2018-07-22 23:18:57	2018-07-22	23:18:57	23:18:57
Site 002	black-tailed deer	2018-07-23 04:41:31	2018-07-23	04:41:31	4:41:31
Site 002	black-tailed deer	2018-07-23 04:41:40	2018-07-23	04:41:40	4:41:40
Site 002	black-tailed deer	2018-07-23 07:58:55	2018-07-23	07:58:55	7:58:55
Site 002	black-tailed deer	2018-07-23 07:59:02	2018-07-23	07:59:02	7:59:02
Site 002	black-tailed deer	2018-07-23 16:14:27	2018-07-23	16:14:27	16:14:27
Site 002	black-tailed deer	2018-07-23 16:17:59	2018-07-23	16:17:59	16:17:59
Site 002	black-tailed deer	2018-07-23 16:19:39	2018-07-23	16:19:39	16:19:39
Site 002	black-tailed deer	2018-07-23 19:49:21	2018-07-23	19:49:21	19:49:21
Site 002	black-tailed deer	2018-07-23 19:49:25	2018-07-23	19:49:25	19:49:25
Site 002	black-tailed deer	2018-07-23 20:21:24	2018-07-23	20:21:24	20:21:24
Site 002	black-tailed deer	2018-07-23 20:21:44	2018-07-23	20:21:44	20:21:44
Site 002	black-tailed deer	2018-07-23 20:22:20	2018-07-23	20:22:20	20:22:20
Site 002	black-tailed deer	2018-07-24 05:39:42	2018-07-24	05:39:42	5:39:42
Site 002	black-tailed deer	2018-07-24 05:40:45	2018-07-24	05:40:45	5:40:45
Site 002	black-tailed deer	2018-07-24 06:26:28	2018-07-24	06:26:28	6:26:28
Site 002	black-tailed deer	2018-07-24 06:26:29	2018-07-24	06:26:29	6:26:29
Site 002	black-tailed deer	2018-07-24 07:29:14	2018-07-24	07:29:14	7:29:14
Site 002	black-tailed deer	2018-07-24 08:31:00	2018-07-24	08:31:00	8:31:00
Site 002	black-tailed deer	2018-07-24 08:31:51	2018-07-24	08:31:51	8:31:51
Site 002	black-tailed deer	2018-07-24 08:32:26	2018-07-24	08:32:26	8:32:26
Site 002	black-tailed deer	2018-07-25 02:42:18	2018-07-25	02:42:18	2:42:18
Site 002	black-tailed deer	2018-07-25 02:55:23	2018-07-25	02:55:23	2:55:23
Site 002	black-tailed deer	2018-07-25 02:55:26	2018-07-25	02:55:26	2:55:26
Site 002	black-tailed deer	2018-07-25 02:56:08	2018-07-25	02:56:08	2:56:08
Site 002	black-tailed deer	2018-07-25 02:57:10	2018-07-25	02:57:10	2:57:10
Site 002	black-tailed deer	2018-07-25 02:57:23	2018-07-25	02:57:23	2:57:23
Site 002	black-tailed deer	2018-07-25 02:58:05	2018-07-25	02:58:05	2:58:05
Site 002	black-tailed deer	2018-07-25 04:04:33	2018-07-25	04:04:33	4:04:33
Site 002	black-tailed deer	2018-07-25 06:24:39	2018-07-25	06:24:39	6:24:39
Site 002	black-tailed deer	2018-07-25 07:04:00	2018-07-25	07:04:00	7:04:00
Site 002	black-tailed deer	2018-07-25 19:21:36	2018-07-25	19:21:36	19:21:36
Site 002	black-tailed deer	2018-07-25 19:22:21	2018-07-25	19:22:21	19:22:21
Site 002	black-tailed deer	2018-07-25 21:32:28	2018-07-25	21:32:28	21:32:28
Site 002	black-tailed deer	2018-07-26 02:34:38	2018-07-26	02:34:38	2:34:38
Site 002	black-tailed deer	2018-07-26 02:35:17	2018-07-26	02:35:17	2:35:17
Site 002	black-tailed deer	2018-07-26 02:38:34	2018-07-26	02:38:34	2:38:34
Site 002	black-tailed deer	2018-07-26 02:41:01	2018-07-26	02:41:01	2:41:01
Site 002	black-tailed deer	2018-07-26 02:42:18	2018-07-26	02:42:18	2:42:18
Site 002	black-tailed deer	2018-07-26 02:48:04	2018-07-26	02:48:04	2:48:04
Site 002	black-tailed deer	2018-07-26 03:36:45	2018-07-26	03:36:45	3:36:45
Site 002	black-tailed deer	2018-07-26 03:37:34	2018-07-26	03:37:34	3:37:34
Site 002	black-tailed deer	2018-07-26 03:41:39	2018-07-26	03:41:39	3:41:39
Site 002	black-tailed deer	2018-07-26 06:28:14	2018-07-26	06:28:14	6:28:14
Site 002	black-tailed deer	2018-07-26 13:27:53	2018-07-26	13:27:53	13:27:53
Site 002	black-tailed deer	2018-07-26 17:57:51	2018-07-26	17:57:51	17:57:51
Site 002	black-tailed deer	2018-07-26 17:58:32	2018-07-26	17:58:32	17:58:32
Site 002	black-tailed deer	2018-07-26 18:25:55	2018-07-26	18:25:55	18:25:55
Site 002	black-tailed deer	2018-07-26 19:29:27	2018-07-26	19:29:27	19:29:27
Site 002	black-tailed deer	2018-07-26 22:37:00	2018-07-26	22:37:00	22:37:00
Site 002	black-tailed deer	2018-07-26 22:37:37	2018-07-26	22:37:37	22:37:37
Site 002	black-tailed deer	2018-07-27 00:23:49	2018-07-27	00:23:49	0:23:49
Site 002	black-tailed deer	2018-07-27 03:03:02	2018-07-27	03:03:02	3:03:02
Site 002	black-tailed deer	2018-07-27 03:03:05	2018-07-27	03:03:05	3:03:05
Site 002	black-tailed deer	2018-07-27 04:25:33	2018-07-27	04:25:33	4:25:33
Site 002	black-tailed deer	2018-07-27 05:50:30	2018-07-27	05:50:30	5:50:30
Site 002	black-tailed deer	2018-07-27 05:50:34	2018-07-27	05:50:34	5:50:34
Site 002	black-tailed deer	2018-07-27 17:28:34	2018-07-27	17:28:34	17:28:34
Site 002	black-tailed deer	2018-07-27 17:29:07	2018-07-27	17:29:07	17:29:07
Site 002	black-tailed deer	2018-07-27 18:35:22	2018-07-27	18:35:22	18:35:22
Site 002	black-tailed deer	2018-07-27 18:35:40	2018-07-27	18:35:40	18:35:40
Site 002	black-tailed deer	2018-07-28 01:04:01	2018-07-28	01:04:01	1:04:01
Site 002	black-tailed deer	2018-07-28 05:44:36	2018-07-28	05:44:36	5:44:36
Site 002	black-tailed deer	2018-07-28 07:32:06	2018-07-28	07:32:06	7:32:06
Site 002	black-tailed deer	2018-07-28 07:32:36	2018-07-28	07:32:36	7:32:36
Site 002	black-tailed deer	2018-07-28 18:26:12	2018-07-28	18:26:12	18:26:12
Site 002	black-tailed deer	2018-07-29 01:19:35	2018-07-29	01:19:35	1:19:35
Site 002	black-tailed deer	2018-07-29 04:04:36	2018-07-29	04:04:36	4:04:36
Site 002	black-tailed deer	2018-07-29 04:10:12	2018-07-29	04:10:12	4:10:12
Site 002	black-tailed deer	2018-07-29 19:53:09	2018-07-29	19:53:09	19:53:09
Site 002	black-tailed deer	2018-07-29 21:23:43	2018-07-29	21:23:43	21:23:43
Site 002	black-tailed deer	2018-07-30 06:22:50	2018-07-30	06:22:50	6:22:50
Site 002	black-tailed deer	2018-07-30 18:56:25	2018-07-30	18:56:25	18:56:25
Site 002	black-tailed deer	2018-07-31 05:40:24	2018-07-31	05:40:24	5:40:24
Site 002	black-tailed deer	2018-07-31 05:40:32	2018-07-31	05:40:32	5:40:32
Site 002	black-tailed deer	2018-07-31 07:55:16	2018-07-31	07:55:16	7:55:16
Site 002	black-tailed deer	2018-07-31 08:13:25	2018-07-31	08:13:25	8:13:25
Site 002	black-tailed deer	2018-07-31 08:20:29	2018-07-31	08:20:29	8:20:29
Site 002	black-tailed deer	2018-07-31 08:21:00	2018-07-31	08:21:00	8:21:00
Site 002	black-tailed deer	2018-07-31 11:42:55	2018-07-31	11:42:55	11:42:55
Site 002	black-tailed deer	2018-08-01 18:33:47	2018-08-01	18:33:47	18:33:47
Site 002	black-tailed deer	2018-08-01 20:01:23	2018-08-01	20:01:23	20:01:23
Site 002	black-tailed deer	2018-08-01 20:04:34	2018-08-01	20:04:34	20:04:34
Site 002	black-tailed deer	2018-08-01 21:35:51	2018-08-01	21:35:51	21:35:51
Site 002	black-tailed deer	2018-08-01 21:37:19	2018-08-01	21:37:19	21:37:19
Site 002	black-tailed deer	2018-08-01 21:37:47	2018-08-01	21:37:47	21:37:47
Site 002	black-tailed deer	2018-08-01 21:58:16	2018-08-01	21:58:16	21:58:16
Site 002	black-tailed deer	2018-08-02 08:37:01	2018-08-02	08:37:01	8:37:01
Site 002	black-tailed deer	2018-08-02 08:40:14	2018-08-02	08:40:14	8:40:14
Site 002	black-tailed deer	2018-08-02 12:00:52	2018-08-02	12:00:52	12:00:52
Site 002	black-tailed deer	2018-08-02 12:02:20	2018-08-02	12:02:20	12:02:20
Site 002	black-tailed deer	2018-08-02 12:04:24	2018-08-02	12:04:24	12:04:24
Site 002	black-tailed deer	2018-08-02 22:23:45	2018-08-02	22:23:45	22:23:45
Site 002	black-tailed deer	2018-08-03 00:26:33	2018-08-03	00:26:33	0:26:33
Site 002	black-tailed deer	2018-08-03 03:50:15	2018-08-03	03:50:15	3:50:15
Site 002	black-tailed deer	2018-08-03 07:34:19	2018-08-03	07:34:19	7:34:19
Site 002	black-tailed deer	2018-08-03 09:22:34	2018-08-03	09:22:34	9:22:34
Site 002	black-tailed deer	2018-08-03 09:56:55	2018-08-03	09:56:55	9:56:55
Site 002	black-tailed deer	2018-08-03 09:57:09	2018-08-03	09:57:09	9:57:09
Site 002	black-tailed deer	2018-08-03 11:28:08	2018-08-03	11:28:08	11:28:08
Site 002	black-tailed deer	2018-08-03 11:28:13	2018-08-03	11:28:13	11:28:13
Site 002	black-tailed deer	2018-08-03 11:28:18	2018-08-03	11:28:18	11:28:18
Site 002	black-tailed deer	2018-08-03 11:31:52	2018-08-03	11:31:52	11:31:52
Site 002	black-tailed deer	2018-08-03 15:06:49	2018-08-03	15:06:49	15:06:49
Site 002	black-tailed deer	2018-08-03 15:08:54	2018-08-03	15:08:54	15:08:54
Site 002	black-tailed deer	2018-08-03 18:40:11	2018-08-03	18:40:11	18:40:11
Site 002	black-tailed deer	2018-08-03 18:40:34	2018-08-03	18:40:34	18:40:34
Site 002	black-tailed deer	2018-08-03 22:01:09	2018-08-03	22:01:09	22:01:09
Site 002	black-tailed deer	2018-08-03 22:11:05	2018-08-03	22:11:05	22:11:05
Site 002	black-tailed deer	2018-08-03 22:15:32	2018-08-03	22:15:32	22:15:32
Site 002	black-tailed deer	2018-08-04 04:40:39	2018-08-04	04:40:39	4:40:39
Site 002	black-tailed deer	2018-08-04 05:57:38	2018-08-04	05:57:38	5:57:38
Site 002	black-tailed deer	2018-08-04 06:24:14	2018-08-04	06:24:14	6:24:14
Site 002	black-tailed deer	2018-08-04 06:52:46	2018-08-04	06:52:46	6:52:46
Site 002	black-tailed deer	2018-08-04 07:13:04	2018-08-04	07:13:04	7:13:04
Site 002	black-tailed deer	2018-08-04 08:37:15	2018-08-04	08:37:15	8:37:15
Site 002	black-tailed deer	2018-08-04 08:37:23	2018-08-04	08:37:23	8:37:23
Site 002	black-tailed deer	2018-08-04 18:02:19	2018-08-04	18:02:19	18:02:19
Site 002	black-tailed deer	2018-08-04 18:02:34	2018-08-04	18:02:34	18:02:34
Site 002	black-tailed deer	2018-08-04 18:05:38	2018-08-04	18:05:38	18:05:38
Site 002	black-tailed deer	2018-08-04 18:37:18	2018-08-04	18:37:18	18:37:18
Site 002	black-tailed deer	2018-08-04 19:15:47	2018-08-04	19:15:47	19:15:47
Site 002	black-tailed deer	2018-08-04 19:17:40	2018-08-04	19:17:40	19:17:40
Site 002	black-tailed deer	2018-08-04 23:20:07	2018-08-04	23:20:07	23:20:07
Site 002	black-tailed deer	2018-08-04 23:20:08	2018-08-04	23:20:08	23:20:08
Site 002	black-tailed deer	2018-08-05 01:49:11	2018-08-05	01:49:11	1:49:11
Site 002	black-tailed deer	2018-08-05 02:29:02	2018-08-05	02:29:02	2:29:02
Site 002	black-tailed deer	2018-08-05 05:47:19	2018-08-05	05:47:19	5:47:19
Site 002	black-tailed deer	2018-08-05 19:47:14	2018-08-05	19:47:14	19:47:14
Site 002	black-tailed deer	2018-08-06 04:02:37	2018-08-06	04:02:37	4:02:37
Site 002	black-tailed deer	2018-08-06 04:04:31	2018-08-06	04:04:31	4:04:31
Site 002	black-tailed deer	2018-08-06 04:06:46	2018-08-06	04:06:46	4:06:46
Site 002	black-tailed deer	2018-08-06 04:08:18	2018-08-06	04:08:18	4:08:18
Site 002	black-tailed deer	2018-08-06 04:28:26	2018-08-06	04:28:26	4:28:26
Site 002	black-tailed deer	2018-08-06 04:30:24	2018-08-06	04:30:24	4:30:24
Site 002	black-tailed deer	2018-08-06 04:30:32	2018-08-06	04:30:32	4:30:32
Site 002	black-tailed deer	2018-08-06 04:30:53	2018-08-06	04:30:53	4:30:53
Site 002	black-tailed deer	2018-08-06 04:31:04	2018-08-06	04:31:04	4:31:04
Site 002	black-tailed deer	2018-08-06 05:00:22	2018-08-06	05:00:22	5:00:22
Site 002	black-tailed deer	2018-08-06 06:08:47	2018-08-06	06:08:47	6:08:47
Site 002	black-tailed deer	2018-08-06 08:26:06	2018-08-06	08:26:06	8:26:06
Site 002	black-tailed deer	2018-08-06 08:27:10	2018-08-06	08:27:10	8:27:10
Site 002	black-tailed deer	2018-08-06 08:35:23	2018-08-06	08:35:23	8:35:23
Site 002	black-tailed deer	2018-08-06 08:38:05	2018-08-06	08:38:05	8:38:05
Site 002	black-tailed deer	2018-08-06 08:39:51	2018-08-06	08:39:51	8:39:51
Site 002	black-tailed deer	2018-08-06 09:13:25	2018-08-06	09:13:25	9:13:25
Site 002	black-tailed deer	2018-08-06 09:13:54	2018-08-06	09:13:54	9:13:54
Site 002	black-tailed deer	2018-08-06 09:16:09	2018-08-06	09:16:09	9:16:09
Site 002	black-tailed deer	2018-08-06 09:38:31	2018-08-06	09:38:31	9:38:31
Site 002	black-tailed deer	2018-08-06 09:38:42	2018-08-06	09:38:42	9:38:42
Site 002	black-tailed deer	2018-08-06 09:38:49	2018-08-06	09:38:49	9:38:49
Site 002	black-tailed deer	2018-08-06 09:39:05	2018-08-06	09:39:05	9:39:05
Site 002	black-tailed deer	2018-08-07 07:06:21	2018-08-07	07:06:21	7:06:21
Site 002	black-tailed deer	2018-08-07 07:10:58	2018-08-07	07:10:58	7:10:58
Site 002	black-tailed deer	2018-08-07 07:31:30	2018-08-07	07:31:30	7:31:30
Site 002	black-tailed deer	2018-08-07 07:37:56	2018-08-07	07:37:56	7:37:56
Site 002	black-tailed deer	2018-08-07 09:17:23	2018-08-07	09:17:23	9:17:23
Site 002	black-tailed deer	2018-08-07 09:18:27	2018-08-07	09:18:27	9:18:27
Site 002	black-tailed deer	2018-08-07 17:53:18	2018-08-07	17:53:18	17:53:18
Site 002	black-tailed deer	2018-08-07 17:55:30	2018-08-07	17:55:30	17:55:30
Site 002	black-tailed deer	2018-08-07 17:58:25	2018-08-07	17:58:25	17:58:25
Site 002	black-tailed deer	2018-08-07 17:59:13	2018-08-07	17:59:13	17:59:13
Site 002	black-tailed deer	2018-08-07 18:20:04	2018-08-07	18:20:04	18:20:04
Site 002	black-tailed deer	2018-08-07 18:24:27	2018-08-07	18:24:27	18:24:27
Site 002	black-tailed deer	2018-08-07 18:25:30	2018-08-07	18:25:30	18:25:30
Site 002	black-tailed deer	2018-08-08 00:09:14	2018-08-08	00:09:14	0:09:14
Site 002	black-tailed deer	2018-08-08 00:09:21	2018-08-08	00:09:21	0:09:21
Site 002	black-tailed deer	2018-08-08 01:31:29	2018-08-08	01:31:29	1:31:29
Site 002	black-tailed deer	2018-08-08 04:24:17	2018-08-08	04:24:17	4:24:17
Site 002	black-tailed deer	2018-08-08 07:55:59	2018-08-08	07:55:59	7:55:59
Site 002	black-tailed deer	2018-08-08 07:59:42	2018-08-08	07:59:42	7:59:42
Site 002	black-tailed deer	2018-08-08 18:20:33	2018-08-08	18:20:33	18:20:33
Site 002	black-tailed deer	2018-08-08 18:24:57	2018-08-08	18:24:57	18:24:57
Site 002	black-tailed deer	2018-08-08 19:31:25	2018-08-08	19:31:25	19:31:25
Site 002	black-tailed deer	2018-08-08 19:32:40	2018-08-08	19:32:40	19:32:40
Site 002	black-tailed deer	2018-08-08 22:33:07	2018-08-08	22:33:07	22:33:07
Site 002	black-tailed deer	2018-08-08 22:35:40	2018-08-08	22:35:40	22:35:40
Site 002	black-tailed deer	2018-08-09 08:20:24	2018-08-09	08:20:24	8:20:24
Site 002	black-tailed deer	2018-08-09 08:21:59	2018-08-09	08:21:59	8:21:59
Site 002	black-tailed deer	2018-08-09 08:22:18	2018-08-09	08:22:18	8:22:18
Site 002	black-tailed deer	2018-08-09 08:30:25	2018-08-09	08:30:25	8:30:25
Site 002	black-tailed deer	2018-08-09 09:07:40	2018-08-09	09:07:40	9:07:40
Site 002	black-tailed deer	2018-08-09 09:08:10	2018-08-09	09:08:10	9:08:10
Site 002	black-tailed deer	2018-08-09 19:20:33	2018-08-09	19:20:33	19:20:33
Site 002	black-tailed deer	2018-08-09 19:21:28	2018-08-09	19:21:28	19:21:28
Site 002	black-tailed deer	2018-08-10 02:30:29	2018-08-10	02:30:29	2:30:29
Site 002	black-tailed deer	2018-08-10 03:53:09	2018-08-10	03:53:09	3:53:09
Site 002	black-tailed deer	2018-08-10 21:00:40	2018-08-10	21:00:40	21:00:40
Site 002	black-tailed deer	2018-08-11 08:00:03	2018-08-11	08:00:03	8:00:03
Site 002	black-tailed deer	2018-08-11 08:00:21	2018-08-11	08:00:21	8:00:21
Site 002	black-tailed deer	2018-08-11 13:56:56	2018-08-11	13:56:56	13:56:56
Site 002	black-tailed deer	2018-08-12 07:14:00	2018-08-12	07:14:00	7:14:00
Site 002	black-tailed deer	2018-08-12 07:16:21	2018-08-12	07:16:21	7:16:21
Site 002	black-tailed deer	2018-08-12 07:20:19	2018-08-12	07:20:19	7:20:19
Site 002	black-tailed deer	2018-08-12 07:26:50	2018-08-12	07:26:50	7:26:50
Site 002	black-tailed deer	2018-08-12 10:34:47	2018-08-12	10:34:47	10:34:47
Site 002	black-tailed deer	2018-08-12 10:35:00	2018-08-12	10:35:00	10:35:00
Site 002	black-tailed deer	2018-08-12 12:19:56	2018-08-12	12:19:56	12:19:56
Site 002	black-tailed deer	2018-08-12 12:20:26	2018-08-12	12:20:26	12:20:26
Site 002	black-tailed deer	2018-08-12 16:23:40	2018-08-12	16:23:40	16:23:40
Site 002	black-tailed deer	2018-08-12 18:49:24	2018-08-12	18:49:24	18:49:24
Site 002	black-tailed deer	2018-08-12 18:49:26	2018-08-12	18:49:26	18:49:26
Site 002	black-tailed deer	2018-08-12 18:49:40	2018-08-12	18:49:40	18:49:40
Site 002	black-tailed deer	2018-08-12 18:50:17	2018-08-12	18:50:17	18:50:17
Site 002	black-tailed deer	2018-08-12 18:52:46	2018-08-12	18:52:46	18:52:46
Site 002	black-tailed deer	2018-08-12 18:54:40	2018-08-12	18:54:40	18:54:40
Site 002	black-tailed deer	2018-08-12 18:56:18	2018-08-12	18:56:18	18:56:18
Site 002	black-tailed deer	2018-08-13 06:59:39	2018-08-13	06:59:39	6:59:39
Site 002	black-tailed deer	2018-08-13 07:43:28	2018-08-13	07:43:28	7:43:28
Site 002	black-tailed deer	2018-08-13 07:43:47	2018-08-13	07:43:47	7:43:47
Site 002	black-tailed deer	2018-08-13 07:43:52	2018-08-13	07:43:52	7:43:52
Site 002	black-tailed deer	2018-08-13 07:45:25	2018-08-13	07:45:25	7:45:25
Site 002	black-tailed deer	2018-08-14 11:01:47	2018-08-14	11:01:47	11:01:47
Site 002	black-tailed deer	2018-08-14 11:02:41	2018-08-14	11:02:41	11:02:41
Site 002	black-tailed deer	2018-08-15 03:34:13	2018-08-15	03:34:13	3:34:13
Site 002	black-tailed deer	2018-08-15 03:34:21	2018-08-15	03:34:21	3:34:21
Site 002	black-tailed deer	2018-08-15 03:34:29	2018-08-15	03:34:29	3:34:29
Site 002	black-tailed deer	2018-08-15 03:34:52	2018-08-15	03:34:52	3:34:52
Site 002	black-tailed deer	2018-08-15 03:35:09	2018-08-15	03:35:09	3:35:09
Site 002	black-tailed deer	2018-08-15 03:55:12	2018-08-15	03:55:12	3:55:12
Site 002	black-tailed deer	2018-08-15 04:10:04	2018-08-15	04:10:04	4:10:04
Site 002	black-tailed deer	2018-08-15 04:11:59	2018-08-15	04:11:59	4:11:59
Site 002	black-tailed deer	2018-08-15 19:26:56	2018-08-15	19:26:56	19:26:56
Site 002	black-tailed deer	2018-08-16 04:34:17	2018-08-16	04:34:17	4:34:17
Site 002	black-tailed deer	2018-08-16 07:08:40	2018-08-16	07:08:40	7:08:40
Site 002	black-tailed deer	2018-08-16 20:10:04	2018-08-16	20:10:04	20:10:04
Site 002	black-tailed deer	2018-08-17 18:32:11	2018-08-17	18:32:11	18:32:11
Site 002	black-tailed deer	2018-08-17 21:41:11	2018-08-17	21:41:11	21:41:11
Site 002	black-tailed deer	2018-08-17 21:41:32	2018-08-17	21:41:32	21:41:32
Site 002	black-tailed deer	2018-08-17 21:46:31	2018-08-17	21:46:31	21:46:31
Site 002	black-tailed deer	2018-08-17 21:47:05	2018-08-17	21:47:05	21:47:05
Site 002	black-tailed deer	2018-08-17 22:20:14	2018-08-17	22:20:14	22:20:14
Site 002	black-tailed deer	2018-08-17 22:23:02	2018-08-17	22:23:02	22:23:02
Site 002	black-tailed deer	2018-08-18 21:57:16	2018-08-18	21:57:16	21:57:16
Site 002	black-tailed deer	2018-08-18 21:57:17	2018-08-18	21:57:17	21:57:17
Site 002	black-tailed deer	2018-08-18 21:57:19	2018-08-18	21:57:19	21:57:19
Site 002	black-tailed deer	2018-08-19 05:33:52	2018-08-19	05:33:52	5:33:52
Site 002	black-tailed deer	2018-08-19 05:33:55	2018-08-19	05:33:55	5:33:55
Site 002	black-tailed deer	2018-08-19 05:35:04	2018-08-19	05:35:04	5:35:04
Site 002	black-tailed deer	2018-08-19 05:39:07	2018-08-19	05:39:07	5:39:07
Site 002	black-tailed deer	2018-08-19 05:40:10	2018-08-19	05:40:10	5:40:10
Site 002	black-tailed deer	2018-08-19 05:43:51	2018-08-19	05:43:51	5:43:51
Site 002	black-tailed deer	2018-08-19 08:10:13	2018-08-19	08:10:13	8:10:13
Site 002	black-tailed deer	2018-08-19 13:40:35	2018-08-19	13:40:35	13:40:35
Site 002	black-tailed deer	2018-08-19 14:27:38	2018-08-19	14:27:38	14:27:38
Site 002	black-tailed deer	2018-08-20 06:29:03	2018-08-20	06:29:03	6:29:03
Site 002	black-tailed deer	2018-08-20 06:30:22	2018-08-20	06:30:22	6:30:22
Site 002	black-tailed deer	2018-08-20 06:30:55	2018-08-20	06:30:55	6:30:55
Site 002	black-tailed deer	2018-08-20 07:38:57	2018-08-20	07:38:57	7:38:57
Site 002	black-tailed deer	2018-08-20 07:39:52	2018-08-20	07:39:52	7:39:52
Site 002	black-tailed deer	2018-08-20 18:43:35	2018-08-20	18:43:35	18:43:35
Site 002	black-tailed deer	2018-08-20 18:45:34	2018-08-20	18:45:34	18:45:34
Site 002	black-tailed deer	2018-08-20 19:03:36	2018-08-20	19:03:36	19:03:36
Site 002	black-tailed deer	2018-08-20 19:59:28	2018-08-20	19:59:28	19:59:28
Site 002	black-tailed deer	2018-08-20 20:01:45	2018-08-20	20:01:45	20:01:45
Site 002	black-tailed deer	2018-08-21 04:58:09	2018-08-21	04:58:09	4:58:09
Site 002	black-tailed deer	2018-08-21 05:07:57	2018-08-21	05:07:57	5:07:57
Site 002	black-tailed deer	2018-08-21 09:06:40	2018-08-21	09:06:40	9:06:40
Site 002	black-tailed deer	2018-08-21 18:46:33	2018-08-21	18:46:33	18:46:33
Site 002	black-tailed deer	2018-08-21 18:47:17	2018-08-21	18:47:17	18:47:17
Site 002	black-tailed deer	2018-08-21 21:09:39	2018-08-21	21:09:39	21:09:39
Site 002	black-tailed deer	2018-08-22 01:27:34	2018-08-22	01:27:34	1:27:34
Site 002	black-tailed deer	2018-08-22 01:28:50	2018-08-22	01:28:50	1:28:50
Site 002	black-tailed deer	2018-08-22 08:36:17	2018-08-22	08:36:17	8:36:17
Site 002	black-tailed deer	2018-08-22 08:39:58	2018-08-22	08:39:58	8:39:58
Site 002	black-tailed deer	2018-08-22 14:19:56	2018-08-22	14:19:56	14:19:56
Site 002	black-tailed deer	2018-08-22 14:22:21	2018-08-22	14:22:21	14:22:21
Site 002	black-tailed deer	2018-08-22 22:34:00	2018-08-22	22:34:00	22:34:00
Site 002	black-tailed deer	2018-08-22 22:36:24	2018-08-22	22:36:24	22:36:24
Site 002	black-tailed deer	2018-08-22 22:38:55	2018-08-22	22:38:55	22:38:55
Site 002	black-tailed deer	2018-08-23 11:55:23	2018-08-23	11:55:23	11:55:23
Site 002	black-tailed deer	2018-08-23 11:56:00	2018-08-23	11:56:00	11:56:00
Site 002	black-tailed deer	2018-08-23 21:32:34	2018-08-23	21:32:34	21:32:34
Site 002	black-tailed deer	2018-08-24 03:31:08	2018-08-24	03:31:08	3:31:08
Site 002	black-tailed deer	2018-08-24 03:31:36	2018-08-24	03:31:36	3:31:36
Site 002	black-tailed deer	2018-08-24 07:50:49	2018-08-24	07:50:49	7:50:49
Site 002	black-tailed deer	2018-08-24 07:51:55	2018-08-24	07:51:55	7:51:55
Site 002	black-tailed deer	2018-08-24 09:50:51	2018-08-24	09:50:51	9:50:51
Site 002	black-tailed deer	2018-08-24 09:51:55	2018-08-24	09:51:55	9:51:55
Site 002	black-tailed deer	2018-08-24 20:43:39	2018-08-24	20:43:39	20:43:39
Site 002	black-tailed deer	2018-08-24 20:45:31	2018-08-24	20:45:31	20:45:31
Site 002	black-tailed deer	2018-08-24 21:07:21	2018-08-24	21:07:21	21:07:21
Site 002	black-tailed deer	2018-08-25 22:11:07	2018-08-25	22:11:07	22:11:07
Site 002	black-tailed deer	2018-08-26 09:21:05	2018-08-26	09:21:05	9:21:05
Site 002	black-tailed deer	2018-08-26 09:27:11	2018-08-26	09:27:11	9:27:11
Site 002	black-tailed deer	2018-08-26 18:23:38	2018-08-26	18:23:38	18:23:38
Site 002	black-tailed deer	2018-08-27 08:20:41	2018-08-27	08:20:41	8:20:41
Site 002	black-tailed deer	2018-08-27 18:24:43	2018-08-27	18:24:43	18:24:43
Site 002	black-tailed deer	2018-08-27 18:28:10	2018-08-27	18:28:10	18:28:10
Site 002	bobcat	2018-05-17 04:26:26	2018-05-17	04:26:26	4:26:26
Site 002	bobcat	2018-05-23 18:59:45	2018-05-23	18:59:45	18:59:45
Site 002	bobcat	2018-05-31 16:44:27	2018-05-31	16:44:27	16:44:27
Site 002	bobcat	2018-06-07 03:50:48	2018-06-07	03:50:48	3:50:48
Site 002	bobcat	2018-06-15 09:13:27	2018-06-15	09:13:27	9:13:27
Site 002	coyote	2018-05-16 00:22:37	2018-05-16	00:22:37	0:22:37
Site 002	coyote	2018-05-28 04:52:44	2018-05-28	04:52:44	4:52:44
Site 002	coyote	2018-06-02 07:30:51	2018-06-02	07:30:51	7:30:51
Site 002	coyote	2018-06-06 04:31:35	2018-06-06	04:31:35	4:31:35
Site 002	coyote	2018-06-27 04:16:07	2018-06-27	04:16:07	4:16:07
Site 002	coyote	2018-07-20 14:36:26	2018-07-20	14:36:26	14:36:26
Site 002	coyote	2018-07-20 14:36:27	2018-07-20	14:36:27	14:36:27
Site 002	coyote	2018-07-20 14:36:28	2018-07-20	14:36:28	14:36:28
Site 002	coyote	2018-07-20 14:36:29	2018-07-20	14:36:29	14:36:29
Site 002	coyote	2018-07-20 14:36:34	2018-07-20	14:36:34	14:36:34
Site 002	coyote	2018-07-25 00:45:04	2018-07-25	00:45:04	0:45:04
Site 002	coyote	2018-07-29 01:19:36	2018-07-29	01:19:36	1:19:36
Site 002	coyote	2018-07-29 01:19:38	2018-07-29	01:19:38	1:19:38
Site 002	coyote	2018-07-30 00:17:21	2018-07-30	00:17:21	0:17:21
Site 002	coyote	2018-08-10 18:58:23	2018-08-10	18:58:23	18:58:23
Site 002	coyote	2018-08-11 03:51:27	2018-08-11	03:51:27	3:51:27
Site 002	coyote	2018-08-11 06:07:47	2018-08-11	06:07:47	6:07:47
Site 002	coyote	2018-08-13 07:21:39	2018-08-13	07:21:39	7:21:39
Site 002	coyote	2018-08-16 03:18:48	2018-08-16	03:18:48	3:18:48
Site 002	coyote	2018-08-16 22:17:16	2018-08-16	22:17:16	22:17:16
Site 002	coyote	2018-08-16 23:55:43	2018-08-16	23:55:43	23:55:43
Site 002	coyote	2018-08-19 05:14:32	2018-08-19	05:14:32	5:14:32
Site 002	coyote	2018-08-23 01:22:18	2018-08-23	01:22:18	1:22:18
Site 002	coyote	2018-08-23 05:43:12	2018-08-23	05:43:12	5:43:12
Site 002	coyote	2018-08-23 07:41:39	2018-08-23	07:41:39	7:41:39
Site 002	coyote	2018-08-25 04:39:19	2018-08-25	04:39:19	4:39:19
Site 002	coyote	2018-08-25 05:52:16	2018-08-25	05:52:16	5:52:16
Site 002	coyote	2018-08-26 03:06:15	2018-08-26	03:06:15	3:06:15
Site 002	domestic cat	2018-06-13 01:47:20	2018-06-13	01:47:20	1:47:20
Site 002	domestic cat	2018-06-17 02:16:01	2018-06-17	02:16:01	2:16:01
Site 002	domestic cat	2018-07-05 01:59:36	2018-07-05	01:59:36	1:59:36
Site 002	domestic cat	2018-07-05 02:40:39	2018-07-05	02:40:39	2:40:39
Site 002	domestic cat	2018-07-12 00:34:18	2018-07-12	00:34:18	0:34:18
Site 002	domestic cat	2018-07-12 00:34:19	2018-07-12	00:34:19	0:34:19
Site 002	domestic cat	2018-07-16 21:44:38	2018-07-16	21:44:38	21:44:38
Site 002	domestic cat	2018-08-01 22:40:17	2018-08-01	22:40:17	22:40:17
Site 002	domestic cat	2018-08-04 00:24:49	2018-08-04	00:24:49	0:24:49
Site 002	domestic cat	2018-08-04 21:53:40	2018-08-04	21:53:40	21:53:40
Site 002	domestic cat	2018-08-08 02:52:35	2018-08-08	02:52:35	2:52:35
Site 002	domestic cat	2018-08-09 23:19:01	2018-08-09	23:19:01	23:19:01
Site 002	domestic dog	2018-05-02 07:11:34	2018-05-02	07:11:34	7:11:34
Site 002	domestic dog	2018-08-25 05:52:23	2018-08-25	05:52:23	5:52:23
Site 002	domestic dog	2018-08-25 05:52:25	2018-08-25	05:52:25	5:52:25
Site 002	domestic dog	2018-08-25 05:52:26	2018-08-25	05:52:26	5:52:26
Site 002	grey fox	2018-06-09 22:13:17	2018-06-09	22:13:17	22:13:17
Site 002	grey fox	2018-06-14 23:17:02	2018-06-14	23:17:02	23:17:02
Site 002	grey fox	2018-06-15 01:14:40	2018-06-15	01:14:40	1:14:40
Site 002	grey fox	2018-06-16 22:11:44	2018-06-16	22:11:44	22:11:44
Site 002	grey fox	2018-06-19 23:22:08	2018-06-19	23:22:08	23:22:08
Site 002	grey fox	2018-06-23 02:09:33	2018-06-23	02:09:33	2:09:33
Site 002	grey fox	2018-07-08 02:14:05	2018-07-08	02:14:05	2:14:05
Site 002	grey fox	2018-07-13 20:44:01	2018-07-13	20:44:01	20:44:01
Site 002	grey fox	2018-07-26 22:51:53	2018-07-26	22:51:53	22:51:53
Site 002	grey fox	2018-08-19 01:30:18	2018-08-19	01:30:18	1:30:18
Site 002	grey fox	2018-08-23 23:07:13	2018-08-23	23:07:13	23:07:13
Site 002	grey fox	2018-08-23 23:07:15	2018-08-23	23:07:15	23:07:15
Site 002	grey fox	2018-08-25 22:48:29	2018-08-25	22:48:29	22:48:29
Site 002	grey fox	2018-08-25 22:48:32	2018-08-25	22:48:32	22:48:32
Site 002	grey fox	2018-08-25 22:48:42	2018-08-25	22:48:42	22:48:42
Site 002	opossum	2018-04-18 21:38:11	2018-04-18	21:38:11	21:38:11
Site 002	opossum	2018-04-19 02:20:06	2018-04-19	02:20:06	2:20:06
Site 002	opossum	2018-04-19 02:20:21	2018-04-19	02:20:21	2:20:21
Site 002	opossum	2018-04-19 03:28:50	2018-04-19	03:28:50	3:28:50
Site 002	opossum	2018-04-19 03:29:03	2018-04-19	03:29:03	3:29:03
Site 002	opossum	2018-04-19 20:52:02	2018-04-19	20:52:02	20:52:02
Site 002	opossum	2018-04-19 20:52:22	2018-04-19	20:52:22	20:52:22
Site 002	opossum	2018-04-21 02:46:25	2018-04-21	02:46:25	2:46:25
Site 002	opossum	2018-04-22 00:10:31	2018-04-22	00:10:31	0:10:31
Site 002	opossum	2018-04-22 22:21:20	2018-04-22	22:21:20	22:21:20
Site 002	opossum	2018-04-24 00:12:02	2018-04-24	00:12:02	0:12:02
Site 002	opossum	2018-04-24 22:53:22	2018-04-24	22:53:22	22:53:22
Site 002	opossum	2018-04-24 23:07:28	2018-04-24	23:07:28	23:07:28
Site 002	opossum	2018-04-24 23:11:09	2018-04-24	23:11:09	23:11:09
Site 002	opossum	2018-04-24 23:46:48	2018-04-24	23:46:48	23:46:48
Site 002	opossum	2018-04-26 01:03:42	2018-04-26	01:03:42	1:03:42
Site 002	opossum	2018-04-26 19:32:37	2018-04-26	19:32:37	19:32:37
Site 002	opossum	2018-04-26 22:28:26	2018-04-26	22:28:26	22:28:26
Site 002	opossum	2018-04-27 20:38:48	2018-04-27	20:38:48	20:38:48
Site 002	opossum	2018-04-27 21:54:46	2018-04-27	21:54:46	21:54:46
Site 002	opossum	2018-04-29 22:59:59	2018-04-29	22:59:59	22:59:59
Site 002	opossum	2018-04-30 04:20:00	2018-04-30	04:20:00	4:20:00
Site 002	opossum	2018-04-30 22:24:48	2018-04-30	22:24:48	22:24:48
Site 002	opossum	2018-05-01 00:51:47	2018-05-01	00:51:47	0:51:47
Site 002	opossum	2018-05-04 21:27:33	2018-05-04	21:27:33	21:27:33
Site 002	opossum	2018-05-10 21:00:11	2018-05-10	21:00:11	21:00:11
Site 002	opossum	2018-05-14 23:35:21	2018-05-14	23:35:21	23:35:21
Site 002	opossum	2018-05-15 22:59:31	2018-05-15	22:59:31	22:59:31
Site 002	opossum	2018-05-16 23:08:19	2018-05-16	23:08:19	23:08:19
Site 002	opossum	2018-05-20 02:14:32	2018-05-20	02:14:32	2:14:32
Site 002	opossum	2018-05-21 00:20:18	2018-05-21	00:20:18	0:20:18
Site 002	opossum	2018-05-22 02:02:22	2018-05-22	02:02:22	2:02:22
Site 002	opossum	2018-05-22 02:02:33	2018-05-22	02:02:33	2:02:33
Site 002	opossum	2018-05-27 01:41:28	2018-05-27	01:41:28	1:41:28
Site 002	opossum	2018-05-27 01:44:46	2018-05-27	01:44:46	1:44:46
Site 002	opossum	2018-05-28 21:44:10	2018-05-28	21:44:10	21:44:10
Site 002	opossum	2018-05-28 21:50:22	2018-05-28	21:50:22	21:50:22
Site 002	opossum	2018-05-28 22:44:49	2018-05-28	22:44:49	22:44:49
Site 002	opossum	2018-05-29 23:10:11	2018-05-29	23:10:11	23:10:11
Site 002	opossum	2018-05-31 21:24:56	2018-05-31	21:24:56	21:24:56
Site 002	opossum	2018-05-31 21:26:46	2018-05-31	21:26:46	21:26:46
Site 002	opossum	2018-06-04 22:03:00	2018-06-04	22:03:00	22:03:00
Site 002	opossum	2018-06-06 22:06:58	2018-06-06	22:06:58	22:06:58
Site 002	opossum	2018-06-07 21:37:45	2018-06-07	21:37:45	21:37:45
Site 002	opossum	2018-06-13 01:32:29	2018-06-13	01:32:29	1:32:29
Site 002	opossum	2018-06-15 03:30:22	2018-06-15	03:30:22	3:30:22
Site 002	opossum	2018-06-15 03:52:05	2018-06-15	03:52:05	3:52:05
Site 002	opossum	2018-06-18 01:12:12	2018-06-18	01:12:12	1:12:12
Site 002	opossum	2018-06-18 01:12:25	2018-06-18	01:12:25	1:12:25
Site 002	opossum	2018-06-19 22:52:03	2018-06-19	22:52:03	22:52:03
Site 002	opossum	2018-06-19 22:52:04	2018-06-19	22:52:04	22:52:04
Site 002	opossum	2018-06-19 23:44:43	2018-06-19	23:44:43	23:44:43
Site 002	opossum	2018-06-22 23:20:10	2018-06-22	23:20:10	23:20:10
Site 002	opossum	2018-06-25 00:45:53	2018-06-25	00:45:53	0:45:53
Site 002	opossum	2018-06-27 21:16:27	2018-06-27	21:16:27	21:16:27
Site 002	opossum	2018-06-30 22:22:09	2018-06-30	22:22:09	22:22:09
Site 002	opossum	2018-07-01 23:24:05	2018-07-01	23:24:05	23:24:05
Site 002	opossum	2018-07-02 00:48:04	2018-07-02	00:48:04	0:48:04
Site 002	opossum	2018-07-05 02:15:30	2018-07-05	02:15:30	2:15:30
Site 002	opossum	2018-07-06 23:21:45	2018-07-06	23:21:45	23:21:45
Site 002	opossum	2018-07-08 23:55:53	2018-07-08	23:55:53	23:55:53
Site 002	opossum	2018-07-08 23:55:54	2018-07-08	23:55:54	23:55:54
Site 002	opossum	2018-07-09 02:05:59	2018-07-09	02:05:59	2:05:59
Site 002	opossum	2018-07-09 02:06:12	2018-07-09	02:06:12	2:06:12
Site 002	opossum	2018-07-15 23:50:25	2018-07-15	23:50:25	23:50:25
Site 002	raccoon	2018-04-19 20:26:46	2018-04-19	20:26:46	20:26:46
Site 002	raccoon	2018-04-19 20:26:48	2018-04-19	20:26:48	20:26:48
Site 002	raccoon	2018-04-19 21:26:30	2018-04-19	21:26:30	21:26:30
Site 002	raccoon	2018-04-19 21:26:31	2018-04-19	21:26:31	21:26:31
Site 002	raccoon	2018-04-19 21:26:35	2018-04-19	21:26:35	21:26:35
Site 002	raccoon	2018-04-19 21:26:37	2018-04-19	21:26:37	21:26:37
Site 002	raccoon	2018-04-19 21:26:38	2018-04-19	21:26:38	21:26:38
Site 002	raccoon	2018-04-19 21:26:41	2018-04-19	21:26:41	21:26:41
Site 002	raccoon	2018-04-19 21:26:42	2018-04-19	21:26:42	21:26:42
Site 002	raccoon	2018-04-19 21:26:43	2018-04-19	21:26:43	21:26:43
Site 002	raccoon	2018-04-19 21:26:44	2018-04-19	21:26:44	21:26:44
Site 002	raccoon	2018-04-19 21:26:46	2018-04-19	21:26:46	21:26:46
Site 002	raccoon	2018-04-20 21:13:07	2018-04-20	21:13:07	21:13:07
Site 002	raccoon	2018-04-21 21:22:02	2018-04-21	21:22:02	21:22:02
Site 002	raccoon	2018-04-21 21:22:26	2018-04-21	21:22:26	21:22:26
Site 002	raccoon	2018-04-21 21:23:45	2018-04-21	21:23:45	21:23:45
Site 002	raccoon	2018-04-22 00:28:13	2018-04-22	00:28:13	0:28:13
Site 002	raccoon	2018-04-22 00:29:21	2018-04-22	00:29:21	0:29:21
Site 002	raccoon	2018-04-22 00:37:37	2018-04-22	00:37:37	0:37:37
Site 002	raccoon	2018-04-22 20:06:31	2018-04-22	20:06:31	20:06:31
Site 002	raccoon	2018-04-22 20:14:57	2018-04-22	20:14:57	20:14:57
Site 002	raccoon	2018-04-22 21:50:24	2018-04-22	21:50:24	21:50:24
Site 002	raccoon	2018-04-22 21:54:09	2018-04-22	21:54:09	21:54:09
Site 002	raccoon	2018-04-23 02:14:21	2018-04-23	02:14:21	2:14:21
Site 002	raccoon	2018-04-23 21:51:45	2018-04-23	21:51:45	21:51:45
Site 002	raccoon	2018-04-23 22:14:28	2018-04-23	22:14:28	22:14:28
Site 002	raccoon	2018-04-23 22:27:16	2018-04-23	22:27:16	22:27:16
Site 002	raccoon	2018-04-24 00:19:26	2018-04-24	00:19:26	0:19:26
Site 002	raccoon	2018-04-24 00:19:44	2018-04-24	00:19:44	0:19:44
Site 002	raccoon	2018-04-24 22:32:30	2018-04-24	22:32:30	22:32:30
Site 002	raccoon	2018-04-24 23:21:42	2018-04-24	23:21:42	23:21:42
Site 002	raccoon	2018-04-24 23:25:13	2018-04-24	23:25:13	23:25:13
Site 002	raccoon	2018-04-24 23:31:38	2018-04-24	23:31:38	23:31:38
Site 002	raccoon	2018-04-25 00:25:36	2018-04-25	00:25:36	0:25:36
Site 002	raccoon	2018-04-25 00:29:08	2018-04-25	00:29:08	0:29:08
Site 002	raccoon	2018-04-25 00:29:46	2018-04-25	00:29:46	0:29:46
Site 002	raccoon	2018-04-25 02:01:45	2018-04-25	02:01:45	2:01:45
Site 002	raccoon	2018-04-25 22:43:19	2018-04-25	22:43:19	22:43:19
Site 002	raccoon	2018-04-26 00:33:53	2018-04-26	00:33:53	0:33:53
Site 002	raccoon	2018-04-26 00:37:54	2018-04-26	00:37:54	0:37:54
Site 002	raccoon	2018-04-26 00:38:33	2018-04-26	00:38:33	0:38:33
Site 002	raccoon	2018-04-27 00:18:15	2018-04-27	00:18:15	0:18:15
Site 002	raccoon	2018-04-27 00:20:10	2018-04-27	00:20:10	0:20:10
Site 002	raccoon	2018-04-28 02:56:22	2018-04-28	02:56:22	2:56:22
Site 002	raccoon	2018-04-28 02:56:23	2018-04-28	02:56:23	2:56:23
Site 002	raccoon	2018-04-28 19:56:25	2018-04-28	19:56:25	19:56:25
Site 002	raccoon	2018-04-28 23:53:57	2018-04-28	23:53:57	23:53:57
Site 002	raccoon	2018-04-29 22:10:00	2018-04-29	22:10:00	22:10:00
Site 002	raccoon	2018-04-29 22:11:19	2018-04-29	22:11:19	22:11:19
Site 002	raccoon	2018-05-02 03:26:21	2018-05-02	03:26:21	3:26:21
Site 002	raccoon	2018-05-02 20:46:29	2018-05-02	20:46:29	20:46:29
Site 002	raccoon	2018-05-03 23:01:03	2018-05-03	23:01:03	23:01:03
Site 002	raccoon	2018-05-04 20:12:03	2018-05-04	20:12:03	20:12:03
Site 002	raccoon	2018-05-05 00:13:31	2018-05-05	00:13:31	0:13:31
Site 002	raccoon	2018-05-09 05:05:01	2018-05-09	05:05:01	5:05:01
Site 002	raccoon	2018-05-09 23:10:14	2018-05-09	23:10:14	23:10:14
Site 002	raccoon	2018-05-09 23:10:42	2018-05-09	23:10:42	23:10:42
Site 002	raccoon	2018-05-11 01:04:10	2018-05-11	01:04:10	1:04:10
Site 002	raccoon	2018-05-12 00:44:11	2018-05-12	00:44:11	0:44:11
Site 002	raccoon	2018-05-12 00:45:26	2018-05-12	00:45:26	0:45:26
Site 002	raccoon	2018-05-12 02:51:01	2018-05-12	02:51:01	2:51:01
Site 002	raccoon	2018-05-16 20:44:19	2018-05-16	20:44:19	20:44:19
Site 002	raccoon	2018-05-21 20:00:23	2018-05-21	20:00:23	20:00:23
Site 002	raccoon	2018-05-22 23:02:42	2018-05-22	23:02:42	23:02:42
Site 002	raccoon	2018-05-22 23:02:44	2018-05-22	23:02:44	23:02:44
Site 002	raccoon	2018-06-05 20:10:52	2018-06-05	20:10:52	20:10:52
Site 002	raccoon	2018-06-05 20:11:10	2018-06-05	20:11:10	20:11:10
Site 002	raccoon	2018-06-10 03:18:30	2018-06-10	03:18:30	3:18:30
Site 002	raccoon	2018-06-13 22:07:45	2018-06-13	22:07:45	22:07:45
Site 002	raccoon	2018-06-13 22:09:03	2018-06-13	22:09:03	22:09:03
Site 002	raccoon	2018-06-14 03:06:33	2018-06-14	03:06:33	3:06:33
Site 002	raccoon	2018-06-14 03:06:43	2018-06-14	03:06:43	3:06:43
Site 002	raccoon	2018-06-15 02:18:46	2018-06-15	02:18:46	2:18:46
Site 002	raccoon	2018-06-29 23:38:29	2018-06-29	23:38:29	23:38:29
Site 002	raccoon	2018-08-14 23:04:58	2018-08-14	23:04:58	23:04:58
Site 002	raccoon	2018-08-14 23:05:00	2018-08-14	23:05:00	23:05:00
Site 003	black-tailed deer	2018-04-24 20:45:11	2018-04-24	20:45:11	20:45:11
Site 003	black-tailed deer	2018-04-30 07:46:34	2018-04-30	07:46:34	7:46:34
Site 003	black-tailed deer	2018-05-09 03:13:10	2018-05-09	03:13:10	3:13:10
Site 003	black-tailed deer	2018-05-09 03:14:14	2018-05-09	03:14:14	3:14:14
Site 003	black-tailed deer	2018-05-09 16:03:58	2018-05-09	16:03:58	16:03:58
Site 003	black-tailed deer	2018-05-14 19:45:00	2018-05-14	19:45:00	19:45:00
Site 003	black-tailed deer	2018-05-25 21:36:10	2018-05-25	21:36:10	21:36:10
Site 003	black-tailed deer	2018-05-26 00:00:46	2018-05-26	00:00:46	0:00:46
Site 003	black-tailed deer	2018-05-26 00:13:26	2018-05-26	00:13:26	0:13:26
Site 003	black-tailed deer	2018-07-01 22:59:26	2018-07-01	22:59:26	22:59:26
Site 003	black-tailed deer	2018-07-08 23:25:31	2018-07-08	23:25:31	23:25:31
Site 003	black-tailed deer	2018-07-08 23:56:47	2018-07-08	23:56:47	23:56:47
Site 003	black-tailed deer	2018-07-19 00:07:36	2018-07-19	00:07:36	0:07:36
Site 003	black-tailed deer	2018-07-25 05:59:45	2018-07-25	05:59:45	5:59:45
Site 003	black-tailed deer	2018-07-26 00:50:45	2018-07-26	00:50:45	0:50:45
Site 003	black-tailed deer	2018-07-30 02:04:09	2018-07-30	02:04:09	2:04:09
Site 003	black-tailed deer	2018-07-30 05:10:40	2018-07-30	05:10:40	5:10:40
Site 003	black-tailed deer	2018-07-31 23:16:04	2018-07-31	23:16:04	23:16:04
Site 003	black-tailed deer	2018-08-03 22:02:14	2018-08-03	22:02:14	22:02:14
Site 003	black-tailed deer	2018-08-07 22:26:32	2018-08-07	22:26:32	22:26:32
Site 003	black-tailed deer	2018-08-08 21:29:08	2018-08-08	21:29:08	21:29:08
Site 003	black-tailed deer	2018-08-08 21:30:23	2018-08-08	21:30:23	21:30:23
Site 003	black-tailed deer	2018-08-08 21:47:01	2018-08-08	21:47:01	21:47:01
Site 003	black-tailed deer	2018-08-09 22:07:01	2018-08-09	22:07:01	22:07:01
Site 003	black-tailed deer	2018-08-10 23:14:27	2018-08-10	23:14:27	23:14:27
Site 003	black-tailed deer	2018-08-11 23:08:58	2018-08-11	23:08:58	23:08:58
Site 003	black-tailed deer	2018-08-19 00:34:52	2018-08-19	00:34:52	0:34:52
Site 003	black-tailed deer	2018-08-20 00:37:54	2018-08-20	00:37:54	0:37:54
Site 003	black-tailed deer	2018-08-21 00:06:10	2018-08-21	00:06:10	0:06:10
Site 003	black-tailed deer	2018-08-22 02:35:25	2018-08-22	02:35:25	2:35:25
Site 003	black-tailed deer	2018-08-22 23:39:00	2018-08-22	23:39:00	23:39:00
Site 003	black-tailed deer	2018-08-23 02:30:23	2018-08-23	02:30:23	2:30:23
Site 003	black-tailed deer	2018-08-23 22:02:56	2018-08-23	22:02:56	22:02:56
Site 003	black-tailed deer	2018-08-24 02:12:31	2018-08-24	02:12:31	2:12:31
Site 003	black-tailed deer	2018-08-24 02:26:49	2018-08-24	02:26:49	2:26:49
Site 003	black-tailed deer	2018-08-27 04:01:14	2018-08-27	04:01:14	4:01:14
Site 003	black-tailed deer	2018-08-28 01:00:01	2018-08-28	01:00:01	1:00:01
Site 003	black-tailed deer	2018-08-29 20:09:42	2018-08-29	20:09:42	20:09:42
Site 003	black-tailed deer	2018-08-29 20:11:17	2018-08-29	20:11:17	20:11:17
Site 003	black-tailed deer	2018-08-29 21:55:48	2018-08-29	21:55:48	21:55:48
Site 003	black-tailed deer	2018-09-02 19:45:30	2018-09-02	19:45:30	19:45:30
Site 003	black-tailed deer	2018-09-03 20:56:30	2018-09-03	20:56:30	20:56:30
Site 003	black-tailed deer	2018-09-06 02:15:14	2018-09-06	02:15:14	2:15:14
Site 003	black-tailed deer	2018-09-06 02:16:46	2018-09-06	02:16:46	2:16:46
Site 003	black-tailed deer	2018-09-06 21:44:18	2018-09-06	21:44:18	21:44:18
Site 003	black-tailed deer	2018-09-06 23:28:45	2018-09-06	23:28:45	23:28:45
Site 003	black-tailed deer	2018-09-09 00:25:17	2018-09-09	00:25:17	0:25:17
Site 003	black-tailed deer	2018-09-11 15:31:09	2018-09-11	15:31:09	15:31:09
Site 003	black-tailed deer	2018-09-12 12:51:29	2018-09-12	12:51:29	12:51:29
Site 003	black-tailed deer	2018-09-24 04:18:09	2018-09-24	04:18:09	4:18:09
Site 003	black-tailed deer	2018-09-25 02:54:53	2018-09-25	02:54:53	2:54:53
Site 003	black-tailed deer	2018-09-25 20:07:48	2018-09-25	20:07:48	20:07:48
Site 003	black-tailed deer	2018-09-26 04:37:45	2018-09-26	04:37:45	4:37:45
Site 003	black-tailed deer	2018-09-29 03:51:07	2018-09-29	03:51:07	3:51:07
Site 003	black-tailed deer	2018-09-30 03:39:01	2018-09-30	03:39:01	3:39:01
Site 003	black-tailed deer	2018-09-30 05:35:22	2018-09-30	05:35:22	5:35:22
Site 003	black-tailed deer	2018-10-02 05:06:35	2018-10-02	05:06:35	5:06:35
Site 003	black-tailed deer	2018-10-03 11:18:48	2018-10-03	11:18:48	11:18:48
Site 003	black-tailed deer	2018-10-04 03:06:18	2018-10-04	03:06:18	3:06:18
Site 003	black-tailed deer	2018-10-04 03:08:46	2018-10-04	03:08:46	3:08:46
Site 003	black-tailed deer	2018-10-04 06:30:57	2018-10-04	06:30:57	6:30:57
Site 003	black-tailed deer	2018-10-06 17:18:14	2018-10-06	17:18:14	17:18:14
Site 003	black-tailed deer	2018-10-07 02:21:14	2018-10-07	02:21:14	2:21:14
Site 003	black-tailed deer	2018-10-07 04:06:20	2018-10-07	04:06:20	4:06:20
Site 003	black-tailed deer	2018-10-08 04:20:57	2018-10-08	04:20:57	4:20:57
Site 003	black-tailed deer	2018-10-11 20:38:40	2018-10-11	20:38:40	20:38:40
Site 003	black-tailed deer	2018-10-12 08:48:50	2018-10-12	08:48:50	8:48:50
Site 003	black-tailed deer	2018-10-13 04:50:06	2018-10-13	04:50:06	4:50:06
Site 003	black-tailed deer	2018-10-14 23:37:11	2018-10-14	23:37:11	23:37:11
Site 003	black-tailed deer	2018-10-14 23:39:14	2018-10-14	23:39:14	23:39:14
Site 003	black-tailed deer	2018-10-15 06:25:21	2018-10-15	06:25:21	6:25:21
Site 003	black-tailed deer	2018-10-16 01:02:17	2018-10-16	01:02:17	1:02:17
Site 003	black-tailed deer	2018-10-18 04:07:23	2018-10-18	04:07:23	4:07:23
Site 003	black-tailed deer	2018-10-23 01:07:02	2018-10-23	01:07:02	1:07:02
Site 003	black-tailed deer	2018-10-25 17:58:00	2018-10-25	17:58:00	17:58:00
Site 003	black-tailed deer	2018-10-30 09:44:12	2018-10-30	09:44:12	9:44:12
Site 003	black-tailed deer	2018-10-31 22:08:12	2018-10-31	22:08:12	22:08:12
Site 003	black-tailed deer	2018-11-04 01:04:34	2018-11-04	01:04:34	1:04:34
Site 003	black-tailed deer	2018-11-06 19:38:10	2018-11-06	19:38:10	19:38:10
Site 003	black-tailed deer	2018-11-09 08:58:28	2018-11-09	08:58:28	8:58:28
Site 003	black-tailed deer	2018-11-09 09:03:52	2018-11-09	09:03:52	9:03:52
Site 003	black-tailed deer	2018-11-10 00:59:04	2018-11-10	00:59:04	0:59:04
Site 003	black-tailed deer	2018-11-11 05:37:57	2018-11-11	05:37:57	5:37:57
Site 003	black-tailed deer	2018-11-13 04:27:25	2018-11-13	04:27:25	4:27:25
Site 003	black-tailed deer	2018-11-13 04:45:31	2018-11-13	04:45:31	4:45:31
Site 003	black-tailed deer	2018-11-15 00:24:11	2018-11-15	00:24:11	0:24:11
Site 003	black-tailed deer	2018-11-22 01:17:17	2018-11-22	01:17:17	1:17:17
Site 003	black-tailed deer	2018-11-22 01:20:27	2018-11-22	01:20:27	1:20:27
Site 003	black-tailed deer	2018-11-22 01:22:45	2018-11-22	01:22:45	1:22:45
Site 003	black-tailed deer	2018-11-27 00:37:16	2018-11-27	00:37:16	0:37:16
Site 003	black-tailed deer	2018-11-27 00:38:54	2018-11-27	00:38:54	0:38:54
Site 003	black-tailed deer	2018-11-27 00:40:00	2018-11-27	00:40:00	0:40:00
Site 003	black-tailed deer	2018-11-27 00:45:21	2018-11-27	00:45:21	0:45:21
Site 003	black-tailed deer	2018-11-27 07:59:28	2018-11-27	07:59:28	7:59:28
Site 003	black-tailed deer	2018-11-30 20:34:19	2018-11-30	20:34:19	20:34:19
Site 003	black-tailed deer	2018-12-01 06:38:47	2018-12-01	06:38:47	6:38:47
Site 003	black-tailed deer	2018-12-06 01:57:11	2018-12-06	01:57:11	1:57:11
Site 003	black-tailed deer	2018-12-19 19:00:08	2018-12-19	19:00:08	19:00:08
Site 003	black-tailed deer	2018-12-28 00:05:32	2018-12-28	00:05:32	0:05:32
Site 003	black-tailed deer	2018-12-28 00:26:05	2018-12-28	00:26:05	0:26:05
Site 003	black-tailed deer	2019-01-01 23:58:53	2019-01-01	23:58:53	23:58:53
Site 003	black-tailed deer	2019-01-11 20:04:15	2019-01-11	20:04:15	20:04:15
Site 003	black-tailed deer	2019-01-13 21:03:37	2019-01-13	21:03:37	21:03:37
Site 003	bobcat	2018-04-30 03:39:01	2018-04-30	03:39:01	3:39:01
Site 003	bobcat	2018-04-30 03:40:34	2018-04-30	03:40:34	3:40:34
Site 003	bobcat	2018-07-11 09:22:30	2018-07-11	09:22:30	9:22:30
Site 003	bobcat	2018-07-11 18:39:41	2018-07-11	18:39:41	18:39:41
Site 003	bobcat	2018-07-12 09:40:06	2018-07-12	09:40:06	9:40:06
Site 003	bobcat	2018-07-12 17:10:28	2018-07-12	17:10:28	17:10:28
Site 003	bobcat	2018-07-15 21:15:09	2018-07-15	21:15:09	21:15:09
Site 003	bobcat	2018-09-24 21:40:45	2018-09-24	21:40:45	21:40:45
Site 003	bobcat	2018-11-04 23:58:22	2018-11-04	23:58:22	23:58:22
Site 003	bobcat	2018-11-17 06:14:53	2018-11-17	06:14:53	6:14:53
Site 003	bobcat	2018-12-10 01:00:38	2018-12-10	01:00:38	1:00:38
Site 003	bobcat	2018-12-17 01:37:15	2018-12-17	01:37:15	1:37:15
Site 003	bobcat	2018-12-17 03:47:11	2018-12-17	03:47:11	3:47:11
Site 003	bobcat	2018-12-17 04:34:13	2018-12-17	04:34:13	4:34:13
Site 003	bobcat	2018-12-18 03:59:55	2018-12-18	03:59:55	3:59:55
Site 003	bobcat	2018-12-20 01:05:54	2018-12-20	01:05:54	1:05:54
Site 003	bobcat	2018-12-29 05:26:47	2018-12-29	05:26:47	5:26:47
Site 003	bobcat	2018-12-30 07:29:34	2018-12-30	07:29:34	7:29:34
Site 003	bobcat	2018-12-31 00:15:09	2018-12-31	00:15:09	0:15:09
Site 003	bobcat	2019-01-11 00:27:55	2019-01-11	00:27:55	0:27:55
Site 003	bobcat	2019-01-26 04:43:47	2019-01-26	04:43:47	4:43:47
Site 003	domestic cat	2018-08-10 02:05:58	2018-08-10	02:05:58	2:05:58
Site 003	domestic cat	2018-08-12 19:36:35	2018-08-12	19:36:35	19:36:35
Site 003	domestic cat	2018-08-23 12:56:04	2018-08-23	12:56:04	12:56:04
Site 003	domestic cat	2018-08-27 05:53:18	2018-08-27	05:53:18	5:53:18
Site 003	opossum	2018-04-24 22:48:20	2018-04-24	22:48:20	22:48:20
Site 003	opossum	2018-04-24 22:52:37	2018-04-24	22:52:37	22:52:37
Site 003	opossum	2018-04-27 02:29:18	2018-04-27	02:29:18	2:29:18
Site 003	opossum	2018-05-05 01:09:58	2018-05-05	01:09:58	1:09:58
Site 003	opossum	2018-05-08 04:44:53	2018-05-08	04:44:53	4:44:53
Site 003	opossum	2018-05-09 23:10:42	2018-05-09	23:10:42	23:10:42
Site 003	opossum	2018-05-27 04:03:24	2018-05-27	04:03:24	4:03:24
Site 003	opossum	2018-07-10 23:03:45	2018-07-10	23:03:45	23:03:45
Site 003	opossum	2018-07-26 04:10:36	2018-07-26	04:10:36	4:10:36
Site 003	opossum	2018-07-26 04:48:39	2018-07-26	04:48:39	4:48:39
Site 003	opossum	2018-07-26 05:02:38	2018-07-26	05:02:38	5:02:38
Site 003	opossum	2018-07-26 05:15:40	2018-07-26	05:15:40	5:15:40
Site 003	opossum	2018-07-26 22:17:27	2018-07-26	22:17:27	22:17:27
Site 003	opossum	2018-07-26 23:08:13	2018-07-26	23:08:13	23:08:13
Site 003	opossum	2018-07-26 23:39:37	2018-07-26	23:39:37	23:39:37
Site 003	opossum	2018-07-26 23:53:15	2018-07-26	23:53:15	23:53:15
Site 003	opossum	2018-07-27 01:43:17	2018-07-27	01:43:17	1:43:17
Site 003	opossum	2018-07-27 01:55:00	2018-07-27	01:55:00	1:55:00
Site 003	opossum	2018-07-27 02:07:15	2018-07-27	02:07:15	2:07:15
Site 003	opossum	2018-07-29 00:56:15	2018-07-29	00:56:15	0:56:15
Site 003	opossum	2018-07-29 02:02:47	2018-07-29	02:02:47	2:02:47
Site 003	opossum	2018-07-29 02:54:19	2018-07-29	02:54:19	2:54:19
Site 003	opossum	2018-07-29 03:13:06	2018-07-29	03:13:06	3:13:06
Site 003	opossum	2018-07-29 04:47:14	2018-07-29	04:47:14	4:47:14
Site 003	opossum	2018-07-31 01:39:48	2018-07-31	01:39:48	1:39:48
Site 003	opossum	2018-07-31 01:55:17	2018-07-31	01:55:17	1:55:17
Site 003	opossum	2018-07-31 03:45:22	2018-07-31	03:45:22	3:45:22
Site 003	opossum	2018-07-31 05:20:19	2018-07-31	05:20:19	5:20:19
Site 003	opossum	2018-08-02 23:17:40	2018-08-02	23:17:40	23:17:40
Site 003	opossum	2018-08-03 00:52:26	2018-08-03	00:52:26	0:52:26
Site 003	opossum	2018-08-03 01:03:35	2018-08-03	01:03:35	1:03:35
Site 003	opossum	2018-08-03 03:49:32	2018-08-03	03:49:32	3:49:32
Site 003	opossum	2018-08-03 05:04:09	2018-08-03	05:04:09	5:04:09
Site 003	opossum	2018-08-03 21:08:05	2018-08-03	21:08:05	21:08:05
Site 003	opossum	2018-08-04 00:01:13	2018-08-04	00:01:13	0:01:13
Site 003	opossum	2018-08-04 01:37:36	2018-08-04	01:37:36	1:37:36
Site 003	opossum	2018-08-04 04:09:51	2018-08-04	04:09:51	4:09:51
Site 003	opossum	2018-08-04 04:48:33	2018-08-04	04:48:33	4:48:33
Site 003	opossum	2018-08-04 21:13:43	2018-08-04	21:13:43	21:13:43
Site 003	opossum	2018-08-05 00:58:41	2018-08-05	00:58:41	0:58:41
Site 003	opossum	2018-08-05 02:22:41	2018-08-05	02:22:41	2:22:41
Site 003	opossum	2018-08-05 03:09:10	2018-08-05	03:09:10	3:09:10
Site 003	opossum	2018-08-05 23:43:47	2018-08-05	23:43:47	23:43:47
Site 003	opossum	2018-08-06 02:19:51	2018-08-06	02:19:51	2:19:51
Site 003	opossum	2018-08-06 21:11:55	2018-08-06	21:11:55	21:11:55
Site 003	opossum	2018-08-06 23:56:50	2018-08-06	23:56:50	23:56:50
Site 003	opossum	2018-08-07 00:11:25	2018-08-07	00:11:25	0:11:25
Site 003	opossum	2018-08-07 02:05:33	2018-08-07	02:05:33	2:05:33
Site 003	opossum	2018-08-07 23:04:11	2018-08-07	23:04:11	23:04:11
Site 003	opossum	2018-08-08 01:25:50	2018-08-08	01:25:50	1:25:50
Site 003	opossum	2018-08-08 23:32:56	2018-08-08	23:32:56	23:32:56
Site 003	opossum	2018-08-09 02:04:31	2018-08-09	02:04:31	2:04:31
Site 003	opossum	2018-08-09 04:31:33	2018-08-09	04:31:33	4:31:33
Site 003	opossum	2018-08-09 05:09:39	2018-08-09	05:09:39	5:09:39
Site 003	opossum	2018-08-09 21:16:31	2018-08-09	21:16:31	21:16:31
Site 003	opossum	2018-08-09 23:41:15	2018-08-09	23:41:15	23:41:15
Site 003	opossum	2018-08-10 04:14:55	2018-08-10	04:14:55	4:14:55
Site 003	opossum	2018-08-10 21:45:09	2018-08-10	21:45:09	21:45:09
Site 003	opossum	2018-08-11 00:41:18	2018-08-11	00:41:18	0:41:18
Site 003	opossum	2018-08-11 21:08:33	2018-08-11	21:08:33	21:08:33
Site 003	opossum	2018-08-11 22:50:08	2018-08-11	22:50:08	22:50:08
Site 003	opossum	2018-08-12 02:54:43	2018-08-12	02:54:43	2:54:43
Site 003	opossum	2018-08-12 03:44:47	2018-08-12	03:44:47	3:44:47
Site 003	opossum	2018-08-12 03:50:25	2018-08-12	03:50:25	3:50:25
Site 003	opossum	2018-08-12 04:39:41	2018-08-12	04:39:41	4:39:41
Site 003	opossum	2018-08-12 22:11:55	2018-08-12	22:11:55	22:11:55
Site 003	opossum	2018-08-13 01:00:55	2018-08-13	01:00:55	1:00:55
Site 003	opossum	2018-08-13 02:31:09	2018-08-13	02:31:09	2:31:09
Site 003	opossum	2018-08-13 22:28:19	2018-08-13	22:28:19	22:28:19
Site 003	opossum	2018-08-14 05:33:31	2018-08-14	05:33:31	5:33:31
Site 003	opossum	2018-08-14 22:48:42	2018-08-14	22:48:42	22:48:42
Site 003	opossum	2018-08-14 23:37:47	2018-08-14	23:37:47	23:37:47
Site 003	opossum	2018-08-14 23:38:52	2018-08-14	23:38:52	23:38:52
Site 003	opossum	2018-08-15 02:12:12	2018-08-15	02:12:12	2:12:12
Site 003	opossum	2018-08-15 20:49:28	2018-08-15	20:49:28	20:49:28
Site 003	opossum	2018-08-15 20:56:33	2018-08-15	20:56:33	20:56:33
Site 003	opossum	2018-08-15 21:35:01	2018-08-15	21:35:01	21:35:01
Site 003	opossum	2018-08-15 23:21:59	2018-08-15	23:21:59	23:21:59
Site 003	opossum	2018-08-16 02:18:27	2018-08-16	02:18:27	2:18:27
Site 003	opossum	2018-08-16 23:40:17	2018-08-16	23:40:17	23:40:17
Site 003	opossum	2018-08-17 01:03:52	2018-08-17	01:03:52	1:03:52
Site 003	opossum	2018-08-17 01:37:39	2018-08-17	01:37:39	1:37:39
Site 003	opossum	2018-08-17 03:27:48	2018-08-17	03:27:48	3:27:48
Site 003	opossum	2018-08-18 02:07:51	2018-08-18	02:07:51	2:07:51
Site 003	opossum	2018-08-18 02:09:11	2018-08-18	02:09:11	2:09:11
Site 003	opossum	2018-08-18 03:41:19	2018-08-18	03:41:19	3:41:19
Site 003	opossum	2018-08-19 01:27:04	2018-08-19	01:27:04	1:27:04
Site 003	opossum	2018-08-19 02:12:36	2018-08-19	02:12:36	2:12:36
Site 003	opossum	2018-08-19 03:46:52	2018-08-19	03:46:52	3:46:52
Site 003	opossum	2018-08-20 01:20:25	2018-08-20	01:20:25	1:20:25
Site 003	opossum	2018-08-20 03:05:29	2018-08-20	03:05:29	3:05:29
Site 003	opossum	2018-08-21 00:29:29	2018-08-21	00:29:29	0:29:29
Site 003	opossum	2018-08-21 02:17:46	2018-08-21	02:17:46	2:17:46
Site 003	opossum	2018-08-23 04:05:43	2018-08-23	04:05:43	4:05:43
Site 003	opossum	2018-08-23 04:13:32	2018-08-23	04:13:32	4:13:32
Site 003	opossum	2018-08-24 04:03:27	2018-08-24	04:03:27	4:03:27
Site 003	opossum	2018-08-25 02:39:14	2018-08-25	02:39:14	2:39:14
Site 003	opossum	2018-08-25 02:57:15	2018-08-25	02:57:15	2:57:15
Site 003	opossum	2018-08-26 02:17:02	2018-08-26	02:17:02	2:17:02
Site 003	opossum	2018-08-27 02:49:29	2018-08-27	02:49:29	2:49:29
Site 003	opossum	2018-08-27 20:58:04	2018-08-27	20:58:04	20:58:04
Site 003	opossum	2018-08-27 23:18:18	2018-08-27	23:18:18	23:18:18
Site 003	opossum	2018-08-28 04:43:07	2018-08-28	04:43:07	4:43:07
Site 003	opossum	2018-08-28 21:21:41	2018-08-28	21:21:41	21:21:41
Site 003	opossum	2018-08-29 20:59:10	2018-08-29	20:59:10	20:59:10
Site 003	opossum	2018-08-29 23:31:16	2018-08-29	23:31:16	23:31:16
Site 003	opossum	2018-08-30 00:28:32	2018-08-30	00:28:32	0:28:32
Site 003	opossum	2018-08-30 04:16:44	2018-08-30	04:16:44	4:16:44
Site 003	opossum	2018-08-30 20:47:30	2018-08-30	20:47:30	20:47:30
Site 003	opossum	2018-08-30 20:49:33	2018-08-30	20:49:33	20:49:33
Site 003	opossum	2018-08-31 00:31:19	2018-08-31	00:31:19	0:31:19
Site 003	opossum	2018-08-31 20:30:34	2018-08-31	20:30:34	20:30:34
Site 003	opossum	2018-08-31 20:35:54	2018-08-31	20:35:54	20:35:54
Site 003	opossum	2018-08-31 20:52:08	2018-08-31	20:52:08	20:52:08
Site 003	opossum	2018-09-01 00:46:56	2018-09-01	00:46:56	0:46:56
Site 003	opossum	2018-09-01 01:03:12	2018-09-01	01:03:12	1:03:12
Site 003	opossum	2018-09-01 01:19:39	2018-09-01	01:19:39	1:19:39
Site 003	opossum	2018-09-01 04:16:46	2018-09-01	04:16:46	4:16:46
Site 003	opossum	2018-09-01 20:27:52	2018-09-01	20:27:52	20:27:52
Site 003	opossum	2018-09-01 20:30:27	2018-09-01	20:30:27	20:30:27
Site 003	opossum	2018-09-02 00:41:42	2018-09-02	00:41:42	0:41:42
Site 003	opossum	2018-09-02 01:24:08	2018-09-02	01:24:08	1:24:08
Site 003	opossum	2018-09-02 03:33:15	2018-09-02	03:33:15	3:33:15
Site 003	opossum	2018-09-02 03:45:02	2018-09-02	03:45:02	3:45:02
Site 003	opossum	2018-09-02 04:37:23	2018-09-02	04:37:23	4:37:23
Site 003	opossum	2018-09-02 20:26:56	2018-09-02	20:26:56	20:26:56
Site 003	opossum	2018-09-03 01:30:31	2018-09-03	01:30:31	1:30:31
Site 003	opossum	2018-09-03 02:06:20	2018-09-03	02:06:20	2:06:20
Site 003	opossum	2018-09-03 03:55:16	2018-09-03	03:55:16	3:55:16
Site 003	opossum	2018-09-03 04:04:45	2018-09-03	04:04:45	4:04:45
Site 003	opossum	2018-09-05 01:49:20	2018-09-05	01:49:20	1:49:20
Site 003	opossum	2018-09-05 02:08:17	2018-09-05	02:08:17	2:08:17
Site 003	opossum	2018-09-05 02:59:27	2018-09-05	02:59:27	2:59:27
Site 003	opossum	2018-09-05 20:14:13	2018-09-05	20:14:13	20:14:13
Site 003	opossum	2018-09-06 03:22:19	2018-09-06	03:22:19	3:22:19
Site 003	opossum	2018-09-06 03:42:16	2018-09-06	03:42:16	3:42:16
Site 003	opossum	2018-09-07 02:06:31	2018-09-07	02:06:31	2:06:31
Site 003	opossum	2018-09-07 02:46:58	2018-09-07	02:46:58	2:46:58
Site 003	opossum	2018-09-07 03:51:29	2018-09-07	03:51:29	3:51:29
Site 003	opossum	2018-09-08 04:45:36	2018-09-08	04:45:36	4:45:36
Site 003	opossum	2018-09-08 05:08:25	2018-09-08	05:08:25	5:08:25
Site 003	opossum	2018-09-09 02:38:54	2018-09-09	02:38:54	2:38:54
Site 003	opossum	2018-09-09 03:20:28	2018-09-09	03:20:28	3:20:28
Site 003	opossum	2018-09-09 23:44:06	2018-09-09	23:44:06	23:44:06
Site 003	opossum	2018-09-10 03:19:45	2018-09-10	03:19:45	3:19:45
Site 003	opossum	2018-09-10 05:14:40	2018-09-10	05:14:40	5:14:40
Site 003	opossum	2018-09-12 04:51:37	2018-09-12	04:51:37	4:51:37
Site 003	opossum	2018-09-12 04:55:56	2018-09-12	04:55:56	4:55:56
Site 003	opossum	2018-09-15 22:51:21	2018-09-15	22:51:21	22:51:21
Site 003	opossum	2018-09-16 04:01:35	2018-09-16	04:01:35	4:01:35
Site 003	opossum	2018-09-16 04:06:12	2018-09-16	04:06:12	4:06:12
Site 003	opossum	2018-09-16 04:31:01	2018-09-16	04:31:01	4:31:01
Site 003	opossum	2018-09-17 02:51:34	2018-09-17	02:51:34	2:51:34
Site 003	opossum	2018-09-19 03:13:28	2018-09-19	03:13:28	3:13:28
Site 003	opossum	2018-09-19 03:20:08	2018-09-19	03:20:08	3:20:08
Site 003	opossum	2018-09-19 03:33:42	2018-09-19	03:33:42	3:33:42
Site 003	opossum	2018-09-25 04:02:00	2018-09-25	04:02:00	4:02:00
Site 003	opossum	2018-09-30 02:19:46	2018-09-30	02:19:46	2:19:46
Site 003	opossum	2018-09-30 04:50:51	2018-09-30	04:50:51	4:50:51
Site 003	opossum	2018-10-01 00:09:40	2018-10-01	00:09:40	0:09:40
Site 003	opossum	2018-10-01 04:42:56	2018-10-01	04:42:56	4:42:56
Site 003	opossum	2018-10-02 21:26:29	2018-10-02	21:26:29	21:26:29
Site 003	opossum	2018-10-03 01:38:38	2018-10-03	01:38:38	1:38:38
Site 003	opossum	2018-10-06 23:54:44	2018-10-06	23:54:44	23:54:44
Site 003	opossum	2018-10-07 01:05:44	2018-10-07	01:05:44	1:05:44
Site 003	opossum	2018-10-07 20:13:06	2018-10-07	20:13:06	20:13:06
Site 003	opossum	2018-10-13 22:22:46	2018-10-13	22:22:46	22:22:46
Site 003	opossum	2018-10-15 03:04:09	2018-10-15	03:04:09	3:04:09
Site 003	opossum	2018-10-15 22:56:00	2018-10-15	22:56:00	22:56:00
Site 003	opossum	2018-10-19 01:18:37	2018-10-19	01:18:37	1:18:37
Site 003	opossum	2018-10-19 01:33:27	2018-10-19	01:33:27	1:33:27
Site 003	opossum	2018-10-20 01:56:05	2018-10-20	01:56:05	1:56:05
Site 003	opossum	2018-10-20 02:37:31	2018-10-20	02:37:31	2:37:31
Site 003	opossum	2018-10-23 05:29:43	2018-10-23	05:29:43	5:29:43
Site 003	opossum	2018-10-23 21:41:15	2018-10-23	21:41:15	21:41:15
Site 003	opossum	2018-10-24 20:10:49	2018-10-24	20:10:49	20:10:49
Site 003	opossum	2018-10-25 19:55:35	2018-10-25	19:55:35	19:55:35
Site 003	opossum	2018-10-28 04:02:07	2018-10-28	04:02:07	4:02:07
Site 003	opossum	2018-10-28 19:01:22	2018-10-28	19:01:22	19:01:22
Site 003	opossum	2018-10-29 02:14:08	2018-10-29	02:14:08	2:14:08
Site 003	opossum	2018-10-29 19:01:51	2018-10-29	19:01:51	19:01:51
Site 003	opossum	2018-11-01 20:07:51	2018-11-01	20:07:51	20:07:51
Site 003	opossum	2018-11-03 00:56:49	2018-11-03	00:56:49	0:56:49
Site 003	opossum	2018-11-05 23:02:48	2018-11-05	23:02:48	23:02:48
Site 003	opossum	2018-11-15 00:53:09	2018-11-15	00:53:09	0:53:09
Site 003	opossum	2018-11-15 05:26:08	2018-11-15	05:26:08	5:26:08
Site 003	opossum	2018-11-26 21:59:50	2018-11-26	21:59:50	21:59:50
Site 003	opossum	2018-11-28 02:14:18	2018-11-28	02:14:18	2:14:18
Site 003	opossum	2018-12-02 00:42:33	2018-12-02	00:42:33	0:42:33
Site 003	opossum	2018-12-02 22:38:44	2018-12-02	22:38:44	22:38:44
Site 003	opossum	2018-12-09 21:32:17	2018-12-09	21:32:17	21:32:17
Site 003	opossum	2018-12-09 23:46:49	2018-12-09	23:46:49	23:46:49
Site 003	opossum	2018-12-12 01:02:38	2018-12-12	01:02:38	1:02:38
Site 003	opossum	2018-12-12 03:09:39	2018-12-12	03:09:39	3:09:39
Site 003	opossum	2018-12-15 23:23:25	2018-12-15	23:23:25	23:23:25
Site 003	raccoon	2018-08-03 01:27:28	2018-08-03	01:27:28	1:27:28
Site 004	black-tailed deer	2018-04-19 10:59:35	2018-04-19	10:59:35	10:59:35
Site 004	black-tailed deer	2018-04-20 07:30:38	2018-04-20	07:30:38	7:30:38
Site 004	black-tailed deer	2018-04-20 16:48:16	2018-04-20	16:48:16	16:48:16
Site 004	black-tailed deer	2018-04-22 10:35:56	2018-04-22	10:35:56	10:35:56
Site 004	black-tailed deer	2018-04-22 10:37:22	2018-04-22	10:37:22	10:37:22
Site 004	black-tailed deer	2018-04-22 13:11:52	2018-04-22	13:11:52	13:11:52
Site 004	black-tailed deer	2018-04-22 13:13:48	2018-04-22	13:13:48	13:13:48
Site 004	black-tailed deer	2018-04-24 09:01:56	2018-04-24	09:01:56	9:01:56
Site 004	black-tailed deer	2018-04-24 09:06:59	2018-04-24	09:06:59	9:06:59
Site 004	black-tailed deer	2018-04-26 09:39:54	2018-04-26	09:39:54	9:39:54
Site 004	black-tailed deer	2018-04-26 20:44:53	2018-04-26	20:44:53	20:44:53
Site 004	black-tailed deer	2018-04-27 05:56:12	2018-04-27	05:56:12	5:56:12
Site 004	black-tailed deer	2018-04-27 05:57:20	2018-04-27	05:57:20	5:57:20
Site 004	black-tailed deer	2018-04-27 05:58:27	2018-04-27	05:58:27	5:58:27
Site 004	black-tailed deer	2018-04-27 06:01:20	2018-04-27	06:01:20	6:01:20
Site 004	black-tailed deer	2018-04-27 06:33:56	2018-04-27	06:33:56	6:33:56
Site 004	black-tailed deer	2018-04-27 13:39:03	2018-04-27	13:39:03	13:39:03
Site 004	black-tailed deer	2018-04-27 13:47:07	2018-04-27	13:47:07	13:47:07
Site 004	black-tailed deer	2018-04-28 07:37:35	2018-04-28	07:37:35	7:37:35
Site 004	black-tailed deer	2018-04-28 08:06:38	2018-04-28	08:06:38	8:06:38
Site 004	black-tailed deer	2018-04-28 20:01:37	2018-04-28	20:01:37	20:01:37
Site 004	black-tailed deer	2018-04-29 11:52:07	2018-04-29	11:52:07	11:52:07
Site 004	black-tailed deer	2018-04-29 14:12:01	2018-04-29	14:12:01	14:12:01
Site 004	black-tailed deer	2018-04-29 17:31:03	2018-04-29	17:31:03	17:31:03
Site 004	black-tailed deer	2018-04-30 06:47:55	2018-04-30	06:47:55	6:47:55
Site 004	black-tailed deer	2018-04-30 16:18:31	2018-04-30	16:18:31	16:18:31
Site 004	black-tailed deer	2018-05-02 06:21:13	2018-05-02	06:21:13	6:21:13
Site 004	black-tailed deer	2018-05-04 08:19:14	2018-05-04	08:19:14	8:19:14
Site 004	black-tailed deer	2018-05-04 08:47:58	2018-05-04	08:47:58	8:47:58
Site 004	black-tailed deer	2018-05-04 15:01:36	2018-05-04	15:01:36	15:01:36
Site 004	black-tailed deer	2018-05-05 11:29:48	2018-05-05	11:29:48	11:29:48
Site 004	black-tailed deer	2018-05-06 13:47:30	2018-05-06	13:47:30	13:47:30
Site 004	black-tailed deer	2018-05-09 08:46:25	2018-05-09	08:46:25	8:46:25
Site 004	black-tailed deer	2018-05-09 12:29:43	2018-05-09	12:29:43	12:29:43
Site 004	black-tailed deer	2018-05-13 07:06:49	2018-05-13	07:06:49	7:06:49
Site 004	black-tailed deer	2018-05-15 05:28:22	2018-05-15	05:28:22	5:28:22
Site 004	black-tailed deer	2018-05-15 05:30:22	2018-05-15	05:30:22	5:30:22
Site 004	black-tailed deer	2018-05-15 05:54:33	2018-05-15	05:54:33	5:54:33
Site 004	black-tailed deer	2018-05-15 16:20:53	2018-05-15	16:20:53	16:20:53
Site 004	black-tailed deer	2018-05-15 16:27:52	2018-05-15	16:27:52	16:27:52
Site 004	black-tailed deer	2018-05-15 20:33:54	2018-05-15	20:33:54	20:33:54
Site 004	black-tailed deer	2018-05-15 20:35:52	2018-05-15	20:35:52	20:35:52
Site 004	black-tailed deer	2018-05-17 10:07:57	2018-05-17	10:07:57	10:07:57
Site 004	black-tailed deer	2018-05-17 10:20:28	2018-05-17	10:20:28	10:20:28
Site 004	black-tailed deer	2018-05-17 11:05:50	2018-05-17	11:05:50	11:05:50
Site 004	black-tailed deer	2018-05-17 17:41:25	2018-05-17	17:41:25	17:41:25
Site 004	black-tailed deer	2018-05-23 10:15:57	2018-05-23	10:15:57	10:15:57
Site 004	black-tailed deer	2018-05-30 20:57:00	2018-05-30	20:57:00	20:57:00
Site 004	black-tailed deer	2018-05-30 21:03:30	2018-05-30	21:03:30	21:03:30
Site 004	black-tailed deer	2018-06-03 10:08:25	2018-06-03	10:08:25	10:08:25
Site 004	black-tailed deer	2018-06-20 08:50:24	2018-06-20	08:50:24	8:50:24
Site 004	black-tailed deer	2018-06-21 14:22:29	2018-06-21	14:22:29	14:22:29
Site 004	black-tailed deer	2018-06-21 14:23:35	2018-06-21	14:23:35	14:23:35
Site 004	black-tailed deer	2018-06-21 19:37:37	2018-06-21	19:37:37	19:37:37
Site 004	black-tailed deer	2018-06-21 19:40:05	2018-06-21	19:40:05	19:40:05
Site 004	black-tailed deer	2018-06-21 19:41:15	2018-06-21	19:41:15	19:41:15
Site 004	black-tailed deer	2018-06-21 19:43:41	2018-06-21	19:43:41	19:43:41
Site 004	black-tailed deer	2018-06-23 07:07:13	2018-06-23	07:07:13	7:07:13
Site 004	black-tailed deer	2018-06-24 02:16:12	2018-06-24	02:16:12	2:16:12
Site 004	black-tailed deer	2018-06-25 17:06:09	2018-06-25	17:06:09	17:06:09
Site 004	black-tailed deer	2018-06-25 17:07:17	2018-06-25	17:07:17	17:07:17
Site 004	black-tailed deer	2018-06-26 15:36:40	2018-06-26	15:36:40	15:36:40
Site 004	black-tailed deer	2018-06-29 10:19:30	2018-06-29	10:19:30	10:19:30
Site 004	black-tailed deer	2018-07-01 14:03:08	2018-07-01	14:03:08	14:03:08
Site 004	black-tailed deer	2018-07-01 19:57:45	2018-07-01	19:57:45	19:57:45
Site 004	black-tailed deer	2018-07-04 06:13:21	2018-07-04	06:13:21	6:13:21
Site 004	black-tailed deer	2018-07-04 09:21:46	2018-07-04	09:21:46	9:21:46
Site 004	black-tailed deer	2018-07-05 16:40:09	2018-07-05	16:40:09	16:40:09
Site 004	black-tailed deer	2018-07-05 18:55:48	2018-07-05	18:55:48	18:55:48
Site 004	black-tailed deer	2018-07-06 06:12:50	2018-07-06	06:12:50	6:12:50
Site 004	black-tailed deer	2018-07-06 18:23:44	2018-07-06	18:23:44	18:23:44
Site 004	black-tailed deer	2018-07-08 05:40:37	2018-07-08	05:40:37	5:40:37
Site 004	black-tailed deer	2018-07-08 06:29:09	2018-07-08	06:29:09	6:29:09
Site 004	black-tailed deer	2018-07-08 06:37:26	2018-07-08	06:37:26	6:37:26
Site 004	black-tailed deer	2018-07-10 15:53:51	2018-07-10	15:53:51	15:53:51
Site 004	black-tailed deer	2018-07-12 15:11:48	2018-07-12	15:11:48	15:11:48
Site 004	black-tailed deer	2018-07-17 11:01:05	2018-07-17	11:01:05	11:01:05
Site 004	black-tailed deer	2018-07-17 11:42:21	2018-07-17	11:42:21	11:42:21
Site 004	black-tailed deer	2018-07-17 14:33:13	2018-07-17	14:33:13	14:33:13
Site 004	black-tailed deer	2018-07-17 18:04:54	2018-07-17	18:04:54	18:04:54
Site 004	black-tailed deer	2018-07-17 19:14:56	2018-07-17	19:14:56	19:14:56
Site 004	black-tailed deer	2018-08-03 07:05:05	2018-08-03	07:05:05	7:05:05
Site 004	black-tailed deer	2018-08-03 07:06:12	2018-08-03	07:06:12	7:06:12
Site 004	black-tailed deer	2018-08-03 09:35:31	2018-08-03	09:35:31	9:35:31
Site 004	black-tailed deer	2018-08-03 09:37:21	2018-08-03	09:37:21	9:37:21
Site 004	black-tailed deer	2018-08-05 20:08:45	2018-08-05	20:08:45	20:08:45
Site 004	black-tailed deer	2018-08-06 05:41:01	2018-08-06	05:41:01	5:41:01
Site 004	black-tailed deer	2018-08-06 20:12:46	2018-08-06	20:12:46	20:12:46
Site 004	black-tailed deer	2018-08-07 19:15:28	2018-08-07	19:15:28	19:15:28
Site 004	black-tailed deer	2018-08-07 19:18:55	2018-08-07	19:18:55	19:18:55
Site 004	black-tailed deer	2018-08-10 11:07:40	2018-08-10	11:07:40	11:07:40
Site 004	black-tailed deer	2018-08-10 11:08:48	2018-08-10	11:08:48	11:08:48
Site 004	black-tailed deer	2018-08-12 06:34:10	2018-08-12	06:34:10	6:34:10
Site 004	black-tailed deer	2018-08-14 18:30:01	2018-08-14	18:30:01	18:30:01
Site 004	black-tailed deer	2018-08-20 16:22:50	2018-08-20	16:22:50	16:22:50
Site 004	black-tailed deer	2018-10-20 09:53:32	2018-10-20	09:53:32	9:53:32
Site 004	black-tailed deer	2018-11-01 14:19:30	2018-11-01	14:19:30	14:19:30
Site 004	black-tailed deer	2018-11-04 17:32:43	2018-11-04	17:32:43	17:32:43
Site 004	black-tailed deer	2018-11-04 17:33:49	2018-11-04	17:33:49	17:33:49
Site 004	black-tailed deer	2018-11-09 16:45:43	2018-11-09	16:45:43	16:45:43
Site 004	black-tailed deer	2018-11-28 14:58:21	2018-11-28	14:58:21	14:58:21
Site 004	black-tailed deer	2018-11-28 15:11:29	2018-11-28	15:11:29	15:11:29
Site 004	black-tailed deer	2018-11-30 09:09:12	2018-11-30	09:09:12	9:09:12
Site 004	black-tailed deer	2018-12-12 17:26:14	2018-12-12	17:26:14	17:26:14
Site 004	black-tailed deer	2018-12-14 10:28:36	2018-12-14	10:28:36	10:28:36
Site 004	black-tailed deer	2018-12-16 16:34:58	2018-12-16	16:34:58	16:34:58
Site 004	black-tailed deer	2018-12-16 16:37:02	2018-12-16	16:37:02	16:37:02
Site 004	black-tailed deer	2018-12-17 14:01:39	2018-12-17	14:01:39	14:01:39
Site 004	black-tailed deer	2018-12-18 11:09:37	2018-12-18	11:09:37	11:09:37
Site 004	black-tailed deer	2018-12-23 10:44:43	2018-12-23	10:44:43	10:44:43
Site 004	black-tailed deer	2018-12-26 11:36:42	2018-12-26	11:36:42	11:36:42
Site 004	black-tailed deer	2018-12-26 11:37:56	2018-12-26	11:37:56	11:37:56
Site 004	black-tailed deer	2018-12-26 12:15:29	2018-12-26	12:15:29	12:15:29
Site 004	black-tailed deer	2018-12-26 12:19:24	2018-12-26	12:19:24	12:19:24
Site 004	black-tailed deer	2018-12-29 07:35:12	2018-12-29	07:35:12	7:35:12
Site 004	black-tailed deer	2018-12-30 15:56:50	2018-12-30	15:56:50	15:56:50
Site 004	black-tailed deer	2018-12-30 16:00:10	2018-12-30	16:00:10	16:00:10
Site 004	black-tailed deer	2019-01-04 10:17:00	2019-01-04	10:17:00	10:17:00
Site 004	black-tailed deer	2019-01-04 10:26:03	2019-01-04	10:26:03	10:26:03
Site 004	black-tailed deer	2019-01-04 12:38:17	2019-01-04	12:38:17	12:38:17
Site 004	black-tailed deer	2019-01-06 10:27:57	2019-01-06	10:27:57	10:27:57
Site 004	black-tailed deer	2019-01-06 10:41:48	2019-01-06	10:41:48	10:41:48
Site 004	bobcat	2018-04-30 02:51:34	2018-04-30	02:51:34	2:51:34
Site 004	domestic cat	2018-05-19 19:52:12	2018-05-19	19:52:12	19:52:12
Site 004	domestic cat	2018-05-20 03:30:10	2018-05-20	03:30:10	3:30:10
Site 004	domestic cat	2018-05-20 07:28:14	2018-05-20	07:28:14	7:28:14
Site 004	domestic cat	2018-05-22 08:43:58	2018-05-22	08:43:58	8:43:58
Site 004	domestic cat	2018-05-23 08:54:14	2018-05-23	08:54:14	8:54:14
Site 004	domestic cat	2018-05-26 07:29:54	2018-05-26	07:29:54	7:29:54
Site 004	domestic cat	2018-05-28 05:32:34	2018-05-28	05:32:34	5:32:34
Site 004	domestic cat	2018-06-02 05:42:21	2018-06-02	05:42:21	5:42:21
Site 004	domestic cat	2018-06-26 02:26:36	2018-06-26	02:26:36	2:26:36
Site 004	domestic cat	2018-06-28 06:43:51	2018-06-28	06:43:51	6:43:51
Site 004	domestic cat	2018-06-30 01:11:39	2018-06-30	01:11:39	1:11:39
Site 004	domestic cat	2018-06-30 03:40:18	2018-06-30	03:40:18	3:40:18
Site 004	domestic cat	2018-07-07 00:43:19	2018-07-07	00:43:19	0:43:19
Site 004	domestic cat	2018-07-08 17:35:25	2018-07-08	17:35:25	17:35:25
Site 004	domestic cat	2018-07-09 07:36:28	2018-07-09	07:36:28	7:36:28
Site 004	domestic cat	2018-07-10 03:46:32	2018-07-10	03:46:32	3:46:32
Site 004	domestic cat	2018-07-11 12:38:29	2018-07-11	12:38:29	12:38:29
Site 004	domestic cat	2018-07-15 14:57:20	2018-07-15	14:57:20	14:57:20
Site 004	domestic cat	2018-07-16 02:39:25	2018-07-16	02:39:25	2:39:25
Site 004	domestic cat	2018-07-18 04:46:50	2018-07-18	04:46:50	4:46:50
Site 004	domestic cat	2018-07-18 22:19:31	2018-07-18	22:19:31	22:19:31
Site 004	domestic cat	2018-07-31 03:51:47	2018-07-31	03:51:47	3:51:47
Site 004	domestic cat	2018-08-10 23:43:16	2018-08-10	23:43:16	23:43:16
Site 004	domestic cat	2018-08-11 23:20:37	2018-08-11	23:20:37	23:20:37
Site 004	domestic cat	2018-08-13 01:57:25	2018-08-13	01:57:25	1:57:25
Site 004	domestic cat	2018-08-19 01:18:35	2018-08-19	01:18:35	1:18:35
Site 004	domestic cat	2018-08-20 00:50:47	2018-08-20	00:50:47	0:50:47
Site 004	domestic cat	2018-10-24 09:49:32	2018-10-24	09:49:32	9:49:32
Site 004	domestic cat	2018-10-30 02:52:21	2018-10-30	02:52:21	2:52:21
Site 004	domestic cat	2018-11-04 17:51:35	2018-11-04	17:51:35	17:51:35
Site 004	domestic cat	2018-11-09 22:14:15	2018-11-09	22:14:15	22:14:15
Site 004	domestic cat	2018-11-10 07:58:14	2018-11-10	07:58:14	7:58:14
Site 004	domestic cat	2018-11-12 00:18:11	2018-11-12	00:18:11	0:18:11
Site 004	domestic cat	2018-11-14 00:07:16	2018-11-14	00:07:16	0:07:16
Site 004	domestic cat	2018-11-15 02:12:32	2018-11-15	02:12:32	2:12:32
Site 004	domestic cat	2018-12-24 15:38:48	2018-12-24	15:38:48	15:38:48
Site 004	domestic dog	2018-05-20 18:30:28	2018-05-20	18:30:28	18:30:28
Site 004	domestic dog	2018-05-26 07:51:50	2018-05-26	07:51:50	7:51:50
Site 004	domestic dog	2018-06-04 11:34:08	2018-06-04	11:34:08	11:34:08
Site 004	domestic dog	2018-08-01 17:36:00	2018-08-01	17:36:00	17:36:00
Site 004	domestic dog	2018-11-03 11:30:08	2018-11-03	11:30:08	11:30:08
Site 004	domestic dog	2019-01-09 13:51:25	2019-01-09	13:51:25	13:51:25
Site 004	domestic dog	2019-01-13 09:21:41	2019-01-13	09:21:41	9:21:41
Site 004	opossum	2018-10-18 20:29:25	2018-10-18	20:29:25	20:29:25
Site 004	opossum	2018-12-30 05:46:33	2018-12-30	05:46:33	5:46:33
Site 004	opossum	2018-12-30 05:47:41	2018-12-30	05:47:41	5:47:41
Site 004	opossum	2018-12-31 01:53:32	2018-12-31	01:53:32	1:53:32
Site 004	opossum	2018-12-31 23:23:22	2018-12-31	23:23:22	23:23:22
Site 004	opossum	2019-01-02 00:50:33	2019-01-02	00:50:33	0:50:33
Site 004	opossum	2019-01-12 23:36:16	2019-01-12	23:36:16	23:36:16
Site 004	opossum	2019-01-21 04:25:33	2019-01-21	04:25:33	4:25:33
Site 004	raccoon	2018-05-19 22:07:08	2018-05-19	22:07:08	22:07:08
Site 004	raccoon	2018-05-22 00:12:31	2018-05-22	00:12:31	0:12:31
Site 004	raccoon	2018-05-24 02:37:49	2018-05-24	02:37:49	2:37:49
Site 004	raccoon	2018-05-24 02:39:08	2018-05-24	02:39:08	2:39:08
Site 004	raccoon	2018-06-03 23:59:29	2018-06-03	23:59:29	23:59:29
Site 004	raccoon	2018-06-25 04:11:23	2018-06-25	04:11:23	4:11:23
Site 004	raccoon	2018-07-07 21:43:33	2018-07-07	21:43:33	21:43:33
Site 004	raccoon	2018-07-07 21:44:45	2018-07-07	21:44:45	21:44:45
Site 004	raccoon	2018-07-08 02:04:33	2018-07-08	02:04:33	2:04:33
Site 004	raccoon	2018-07-08 21:40:59	2018-07-08	21:40:59	21:40:59
Site 004	raccoon	2018-07-14 09:39:22	2018-07-14	09:39:22	9:39:22
Site 004	raccoon	2018-07-17 02:57:33	2018-07-17	02:57:33	2:57:33
Site 004	raccoon	2018-07-18 10:02:32	2018-07-18	10:02:32	10:02:32
Site 004	raccoon	2018-07-18 23:19:20	2018-07-18	23:19:20	23:19:20
Site 004	raccoon	2018-07-31 02:14:37	2018-07-31	02:14:37	2:14:37
Site 004	raccoon	2018-08-01 23:05:32	2018-08-01	23:05:32	23:05:32
Site 004	raccoon	2018-08-06 01:52:37	2018-08-06	01:52:37	1:52:37
Site 004	raccoon	2018-08-10 21:30:04	2018-08-10	21:30:04	21:30:04
Site 004	raccoon	2018-08-11 05:43:42	2018-08-11	05:43:42	5:43:42
Site 004	raccoon	2018-08-11 05:45:37	2018-08-11	05:45:37	5:45:37
Site 004	raccoon	2018-08-11 05:48:41	2018-08-11	05:48:41	5:48:41
Site 004	raccoon	2018-08-13 22:07:36	2018-08-13	22:07:36	22:07:36
Site 004	raccoon	2018-08-14 00:58:21	2018-08-14	00:58:21	0:58:21
Site 004	raccoon	2018-08-20 00:53:50	2018-08-20	00:53:50	0:53:50
Site 004	raccoon	2018-09-02 00:03:20	2018-09-02	00:03:20	0:03:20
Site 004	raccoon	2018-09-02 00:50:44	2018-09-02	00:50:44	0:50:44
Site 004	raccoon	2018-09-02 02:19:13	2018-09-02	02:19:13	2:19:13
Site 004	raccoon	2018-10-17 05:28:02	2018-10-17	05:28:02	5:28:02
Site 004	raccoon	2018-10-18 06:29:07	2018-10-18	06:29:07	6:29:07
Site 004	raccoon	2018-10-30 23:04:48	2018-10-30	23:04:48	23:04:48
Site 004	raccoon	2018-11-15 22:33:47	2018-11-15	22:33:47	22:33:47
Site 004	raccoon	2018-12-01 05:10:19	2018-12-01	05:10:19	5:10:19
Site 004	raccoon	2018-12-14 00:49:19	2018-12-14	00:49:19	0:49:19
Site 004	raccoon	2018-12-14 19:20:25	2018-12-14	19:20:25	19:20:25
Site 004	raccoon	2018-12-23 05:10:17	2018-12-23	05:10:17	5:10:17
Site 004	raccoon	2018-12-30 21:12:11	2018-12-30	21:12:11	21:12:11
Site 004	raccoon	2019-01-02 06:10:18	2019-01-02	06:10:18	6:10:18
Site 004	raccoon	2019-01-05 03:53:58	2019-01-05	03:53:58	3:53:58
Site 004	raccoon	2019-01-07 21:57:51	2019-01-07	21:57:51	21:57:51
Site 004	raccoon	2019-01-08 00:14:11	2019-01-08	00:14:11	0:14:11
Site 004	raccoon	2019-01-08 02:15:16	2019-01-08	02:15:16	2:15:16
Site 004	raccoon	2019-01-08 02:20:02	2019-01-08	02:20:02	2:20:02
Site 004	raccoon	2019-01-13 04:08:31	2019-01-13	04:08:31	4:08:31
Site 004	raccoon	2019-01-13 07:06:17	2019-01-13	07:06:17	7:06:17
Site 004	raccoon	2019-01-13 07:13:05	2019-01-13	07:13:05	7:13:05
Site 004	raccoon	2019-01-13 07:15:13	2019-01-13	07:15:13	7:15:13
Site 004	raccoon	2019-01-13 07:16:56	2019-01-13	07:16:56	7:16:56
Site 004	raccoon	2019-01-13 23:21:46	2019-01-13	23:21:46	23:21:46
Site 005	black-tailed deer	2018-04-29 07:28:23	2018-04-29	07:28:23	7:28:23
Site 005	black-tailed deer	2018-04-30 04:58:54	2018-04-30	04:58:54	4:58:54
Site 005	black-tailed deer	2018-04-30 05:01:20	2018-04-30	05:01:20	5:01:20
Site 005	black-tailed deer	2018-04-30 05:02:27	2018-04-30	05:02:27	5:02:27
Site 005	black-tailed deer	2018-04-30 05:03:32	2018-04-30	05:03:32	5:03:32
Site 005	black-tailed deer	2018-05-01 08:47:36	2018-05-01	08:47:36	8:47:36
Site 005	black-tailed deer	2018-05-01 09:33:49	2018-05-01	09:33:49	9:33:49
Site 005	black-tailed deer	2018-05-01 09:58:37	2018-05-01	09:58:37	9:58:37
Site 005	black-tailed deer	2018-05-04 23:03:23	2018-05-04	23:03:23	23:03:23
Site 005	black-tailed deer	2018-05-06 20:46:32	2018-05-06	20:46:32	20:46:32
Site 005	black-tailed deer	2018-05-06 20:47:48	2018-05-06	20:47:48	20:47:48
Site 005	black-tailed deer	2018-05-06 20:49:17	2018-05-06	20:49:17	20:49:17
Site 005	black-tailed deer	2018-05-06 20:50:23	2018-05-06	20:50:23	20:50:23
Site 005	black-tailed deer	2018-05-07 00:07:41	2018-05-07	00:07:41	0:07:41
Site 005	black-tailed deer	2018-05-08 01:29:59	2018-05-08	01:29:59	1:29:59
Site 005	black-tailed deer	2018-05-08 01:31:20	2018-05-08	01:31:20	1:31:20
Site 005	black-tailed deer	2018-05-08 04:09:07	2018-05-08	04:09:07	4:09:07
Site 005	black-tailed deer	2018-05-15 10:20:24	2018-05-15	10:20:24	10:20:24
Site 005	black-tailed deer	2018-05-15 10:21:41	2018-05-15	10:21:41	10:21:41
Site 005	black-tailed deer	2018-05-19 05:58:53	2018-05-19	05:58:53	5:58:53
Site 005	black-tailed deer	2018-05-19 05:59:58	2018-05-19	05:59:58	5:59:58
Site 005	black-tailed deer	2018-05-22 07:34:31	2018-05-22	07:34:31	7:34:31
Site 005	black-tailed deer	2018-05-23 05:57:15	2018-05-23	05:57:15	5:57:15
Site 005	black-tailed deer	2018-05-25 06:28:49	2018-05-25	06:28:49	6:28:49
Site 005	black-tailed deer	2018-05-26 06:54:12	2018-05-26	06:54:12	6:54:12
Site 005	black-tailed deer	2018-05-26 07:12:45	2018-05-26	07:12:45	7:12:45
Site 005	black-tailed deer	2018-05-26 07:15:28	2018-05-26	07:15:28	7:15:28
Site 005	black-tailed deer	2018-05-29 04:03:46	2018-05-29	04:03:46	4:03:46
Site 005	black-tailed deer	2018-05-29 04:05:29	2018-05-29	04:05:29	4:05:29
Site 005	black-tailed deer	2018-05-30 00:49:52	2018-05-30	00:49:52	0:49:52
Site 005	black-tailed deer	2018-05-30 00:50:58	2018-05-30	00:50:58	0:50:58
Site 005	black-tailed deer	2018-05-30 00:52:05	2018-05-30	00:52:05	0:52:05
Site 005	black-tailed deer	2018-05-30 00:53:57	2018-05-30	00:53:57	0:53:57
Site 005	black-tailed deer	2018-05-30 00:55:12	2018-05-30	00:55:12	0:55:12
Site 005	black-tailed deer	2018-05-30 07:34:07	2018-05-30	07:34:07	7:34:07
Site 005	black-tailed deer	2018-05-30 07:35:12	2018-05-30	07:35:12	7:35:12
Site 005	black-tailed deer	2018-05-30 07:40:27	2018-05-30	07:40:27	7:40:27
Site 005	black-tailed deer	2018-06-06 05:52:27	2018-06-06	05:52:27	5:52:27
Site 005	black-tailed deer	2018-06-14 04:52:02	2018-06-14	04:52:02	4:52:02
Site 005	black-tailed deer	2018-06-14 04:53:09	2018-06-14	04:53:09	4:53:09
Site 005	black-tailed deer	2018-06-14 04:54:17	2018-06-14	04:54:17	4:54:17
Site 005	black-tailed deer	2018-06-19 10:13:10	2018-06-19	10:13:10	10:13:10
Site 005	black-tailed deer	2018-06-25 05:28:59	2018-06-25	05:28:59	5:28:59
Site 005	black-tailed deer	2018-06-30 07:05:20	2018-06-30	07:05:20	7:05:20
Site 005	black-tailed deer	2018-06-30 07:06:31	2018-06-30	07:06:31	7:06:31
Site 005	black-tailed deer	2018-07-01 09:41:20	2018-07-01	09:41:20	9:41:20
Site 005	black-tailed deer	2018-07-01 09:42:44	2018-07-01	09:42:44	9:42:44
Site 005	black-tailed deer	2018-07-01 22:10:03	2018-07-01	22:10:03	22:10:03
Site 005	black-tailed deer	2018-07-01 22:11:08	2018-07-01	22:11:08	22:11:08
Site 005	black-tailed deer	2018-07-01 22:12:13	2018-07-01	22:12:13	22:12:13
Site 005	black-tailed deer	2018-07-04 19:44:56	2018-07-04	19:44:56	19:44:56
Site 005	black-tailed deer	2018-07-04 19:48:01	2018-07-04	19:48:01	19:48:01
Site 005	black-tailed deer	2018-07-04 20:05:43	2018-07-04	20:05:43	20:05:43
Site 005	black-tailed deer	2018-07-05 03:16:31	2018-07-05	03:16:31	3:16:31
Site 005	black-tailed deer	2018-07-05 03:18:07	2018-07-05	03:18:07	3:18:07
Site 005	black-tailed deer	2018-07-05 03:21:10	2018-07-05	03:21:10	3:21:10
Site 005	black-tailed deer	2018-07-09 05:38:15	2018-07-09	05:38:15	5:38:15
Site 005	black-tailed deer	2018-07-12 04:33:07	2018-07-12	04:33:07	4:33:07
Site 005	black-tailed deer	2018-07-12 04:34:14	2018-07-12	04:34:14	4:34:14
Site 005	black-tailed deer	2018-07-12 04:35:50	2018-07-12	04:35:50	4:35:50
Site 005	black-tailed deer	2018-07-12 04:36:56	2018-07-12	04:36:56	4:36:56
Site 005	black-tailed deer	2018-07-12 04:38:01	2018-07-12	04:38:01	4:38:01
Site 005	black-tailed deer	2018-07-12 05:04:36	2018-07-12	05:04:36	5:04:36
Site 005	black-tailed deer	2018-07-14 06:35:03	2018-07-14	06:35:03	6:35:03
Site 005	black-tailed deer	2018-07-15 06:58:03	2018-07-15	06:58:03	6:58:03
Site 005	black-tailed deer	2018-07-19 05:25:53	2018-07-19	05:25:53	5:25:53
Site 005	black-tailed deer	2018-07-26 09:46:04	2018-07-26	09:46:04	9:46:04
Site 005	black-tailed deer	2018-08-01 20:39:36	2018-08-01	20:39:36	20:39:36
Site 005	black-tailed deer	2018-08-02 07:05:37	2018-08-02	07:05:37	7:05:37
Site 005	black-tailed deer	2018-08-08 06:26:51	2018-08-08	06:26:51	6:26:51
Site 005	black-tailed deer	2018-08-08 11:25:12	2018-08-08	11:25:12	11:25:12
Site 005	black-tailed deer	2018-08-13 20:17:03	2018-08-13	20:17:03	20:17:03
Site 005	black-tailed deer	2018-08-26 08:46:17	2018-08-26	08:46:17	8:46:17
Site 005	black-tailed deer	2018-08-28 06:32:41	2018-08-28	06:32:41	6:32:41
Site 005	black-tailed deer	2018-08-28 06:34:54	2018-08-28	06:34:54	6:34:54
Site 005	black-tailed deer	2018-08-29 00:12:17	2018-08-29	00:12:17	0:12:17
Site 005	black-tailed deer	2018-08-30 05:13:55	2018-08-30	05:13:55	5:13:55
Site 005	black-tailed deer	2018-08-31 20:17:36	2018-08-31	20:17:36	20:17:36
Site 005	black-tailed deer	2018-09-03 03:13:12	2018-09-03	03:13:12	3:13:12
Site 005	black-tailed deer	2018-09-03 03:17:43	2018-09-03	03:17:43	3:17:43
Site 005	black-tailed deer	2018-09-03 03:19:04	2018-09-03	03:19:04	3:19:04
Site 005	black-tailed deer	2018-09-07 06:32:38	2018-09-07	06:32:38	6:32:38
Site 005	black-tailed deer	2018-09-07 06:33:43	2018-09-07	06:33:43	6:33:43
Site 005	black-tailed deer	2018-09-09 06:21:10	2018-09-09	06:21:10	6:21:10
Site 005	black-tailed deer	2018-09-09 06:24:27	2018-09-09	06:24:27	6:24:27
Site 005	black-tailed deer	2018-09-09 06:25:53	2018-09-09	06:25:53	6:25:53
Site 005	black-tailed deer	2018-09-17 06:38:30	2018-09-17	06:38:30	6:38:30
Site 005	black-tailed deer	2018-09-21 10:53:20	2018-09-21	10:53:20	10:53:20
Site 005	black-tailed deer	2018-10-06 08:23:31	2018-10-06	08:23:31	8:23:31
Site 005	black-tailed deer	2018-10-10 07:26:47	2018-10-10	07:26:47	7:26:47
Site 005	black-tailed deer	2018-10-12 08:10:18	2018-10-12	08:10:18	8:10:18
Site 005	black-tailed deer	2018-10-12 08:11:46	2018-10-12	08:11:46	8:11:46
Site 005	black-tailed deer	2018-10-13 07:06:50	2018-10-13	07:06:50	7:06:50
Site 005	black-tailed deer	2018-10-13 07:07:55	2018-10-13	07:07:55	7:07:55
Site 005	black-tailed deer	2018-10-17 06:54:10	2018-10-17	06:54:10	6:54:10
Site 005	black-tailed deer	2018-10-24 04:51:55	2018-10-24	04:51:55	4:51:55
Site 005	black-tailed deer	2018-10-24 09:04:58	2018-10-24	09:04:58	9:04:58
Site 005	black-tailed deer	2018-10-24 09:06:10	2018-10-24	09:06:10	9:06:10
Site 005	black-tailed deer	2018-10-27 09:46:16	2018-10-27	09:46:16	9:46:16
Site 005	black-tailed deer	2018-10-27 09:47:20	2018-10-27	09:47:20	9:47:20
Site 005	black-tailed deer	2018-10-27 10:09:11	2018-10-27	10:09:11	10:09:11
Site 005	black-tailed deer	2018-10-27 10:15:21	2018-10-27	10:15:21	10:15:21
Site 005	black-tailed deer	2018-10-30 09:19:28	2018-10-30	09:19:28	9:19:28
Site 005	black-tailed deer	2018-11-02 04:07:05	2018-11-02	04:07:05	4:07:05
Site 005	black-tailed deer	2018-11-08 00:57:30	2018-11-08	00:57:30	0:57:30
Site 005	black-tailed deer	2018-11-08 09:33:23	2018-11-08	09:33:23	9:33:23
Site 005	black-tailed deer	2018-11-17 07:13:58	2018-11-17	07:13:58	7:13:58
Site 005	black-tailed deer	2018-11-17 07:16:19	2018-11-17	07:16:19	7:16:19
Site 005	black-tailed deer	2018-11-29 08:33:12	2018-11-29	08:33:12	8:33:12
Site 005	black-tailed deer	2018-12-17 08:15:31	2018-12-17	08:15:31	8:15:31
Site 005	black-tailed deer	2018-12-21 08:06:21	2018-12-21	08:06:21	8:06:21
Site 005	black-tailed deer	2018-12-21 11:51:41	2018-12-21	11:51:41	11:51:41
Site 005	black-tailed deer	2018-12-26 03:30:11	2018-12-26	03:30:11	3:30:11
Site 005	black-tailed deer	2018-12-28 07:36:05	2018-12-28	07:36:05	7:36:05
Site 005	black-tailed deer	2019-01-01 08:50:19	2019-01-01	08:50:19	8:50:19
Site 005	black-tailed deer	2019-01-11 07:24:56	2019-01-11	07:24:56	7:24:56
Site 005	black-tailed deer	2019-01-13 02:30:23	2019-01-13	02:30:23	2:30:23
Site 005	black-tailed deer	2019-01-25 09:55:55	2019-01-25	09:55:55	9:55:55
Site 005	black-tailed deer	2019-01-25 10:00:21	2019-01-25	10:00:21	10:00:21
Site 005	black-tailed deer	2019-01-26 04:18:24	2019-01-26	04:18:24	4:18:24
Site 005	cougar	2018-10-07 23:44:49	2018-10-07	23:44:49	23:44:49
Site 005	coyote	2018-07-09 13:35:58	2018-07-09	13:35:58	13:35:58
Site 005	coyote	2018-07-10 13:48:09	2018-07-10	13:48:09	13:48:09
Site 005	coyote	2018-07-10 14:22:27	2018-07-10	14:22:27	14:22:27
Site 005	coyote	2018-07-31 21:57:12	2018-07-31	21:57:12	21:57:12
Site 005	coyote	2018-08-04 23:37:22	2018-08-04	23:37:22	23:37:22
Site 005	coyote	2018-08-05 21:06:45	2018-08-05	21:06:45	21:06:45
Site 005	coyote	2018-08-05 21:17:01	2018-08-05	21:17:01	21:17:01
Site 005	coyote	2018-08-06 10:26:34	2018-08-06	10:26:34	10:26:34
Site 005	coyote	2018-08-07 13:04:12	2018-08-07	13:04:12	13:04:12
Site 005	coyote	2018-08-07 22:07:47	2018-08-07	22:07:47	22:07:47
Site 005	coyote	2018-08-07 22:27:13	2018-08-07	22:27:13	22:27:13
Site 005	coyote	2018-08-08 01:11:33	2018-08-08	01:11:33	1:11:33
Site 005	coyote	2018-08-08 06:15:53	2018-08-08	06:15:53	6:15:53
Site 005	coyote	2018-08-08 18:52:25	2018-08-08	18:52:25	18:52:25
Site 005	coyote	2018-08-08 23:10:17	2018-08-08	23:10:17	23:10:17
Site 005	coyote	2018-08-10 10:26:07	2018-08-10	10:26:07	10:26:07
Site 005	coyote	2018-08-11 23:17:36	2018-08-11	23:17:36	23:17:36
Site 005	coyote	2018-08-12 03:01:37	2018-08-12	03:01:37	3:01:37
Site 005	coyote	2018-08-12 15:46:34	2018-08-12	15:46:34	15:46:34
Site 005	coyote	2018-08-13 14:55:04	2018-08-13	14:55:04	14:55:04
Site 005	coyote	2018-08-13 16:42:14	2018-08-13	16:42:14	16:42:14
Site 005	coyote	2018-08-13 23:26:03	2018-08-13	23:26:03	23:26:03
Site 005	coyote	2018-08-13 23:54:36	2018-08-13	23:54:36	23:54:36
Site 005	coyote	2018-08-14 13:31:34	2018-08-14	13:31:34	13:31:34
Site 005	coyote	2018-08-15 04:58:43	2018-08-15	04:58:43	4:58:43
Site 005	coyote	2018-08-15 05:03:19	2018-08-15	05:03:19	5:03:19
Site 005	coyote	2018-08-15 23:54:42	2018-08-15	23:54:42	23:54:42
Site 005	coyote	2018-08-16 20:42:45	2018-08-16	20:42:45	20:42:45
Site 005	coyote	2018-08-25 11:28:56	2018-08-25	11:28:56	11:28:56
Site 005	coyote	2018-08-27 22:20:42	2018-08-27	22:20:42	22:20:42
Site 005	coyote	2018-08-29 08:39:54	2018-08-29	08:39:54	8:39:54
Site 005	coyote	2018-08-29 20:11:15	2018-08-29	20:11:15	20:11:15
Site 005	coyote	2018-08-29 20:25:48	2018-08-29	20:25:48	20:25:48
Site 005	coyote	2018-10-04 01:29:06	2018-10-04	01:29:06	1:29:06
Site 005	coyote	2018-10-14 07:20:09	2018-10-14	07:20:09	7:20:09
Site 005	coyote	2018-10-21 23:46:46	2018-10-21	23:46:46	23:46:46
Site 005	coyote	2018-10-22 08:31:34	2018-10-22	08:31:34	8:31:34
Site 005	coyote	2018-11-08 00:11:21	2018-11-08	00:11:21	0:11:21
Site 005	coyote	2018-11-10 20:07:14	2018-11-10	20:07:14	20:07:14
Site 005	coyote	2019-01-03 00:13:15	2019-01-03	00:13:15	0:13:15
Site 005	coyote	2019-01-07 22:47:26	2019-01-07	22:47:26	22:47:26
Site 005	coyote	2019-01-13 21:06:27	2019-01-13	21:06:27	21:06:27
Site 005	coyote	2019-01-16 10:37:52	2019-01-16	10:37:52	10:37:52
Site 005	coyote	2019-01-22 01:18:53	2019-01-22	01:18:53	1:18:53
Site 005	coyote	2019-01-25 00:02:22	2019-01-25	00:02:22	0:02:22
Site 005	domestic dog	2018-09-03 19:18:32	2018-09-03	19:18:32	19:18:32
Site 005	grey fox	2018-08-23 14:39:02	2018-08-23	14:39:02	14:39:02
Site 005	grey fox	2018-08-24 00:53:01	2018-08-24	00:53:01	0:53:01
Site 005	grey fox	2018-08-24 00:58:10	2018-08-24	00:58:10	0:58:10
Site 005	grey fox	2018-08-24 01:00:22	2018-08-24	01:00:22	1:00:22
Site 005	grey fox	2018-08-24 01:12:28	2018-08-24	01:12:28	1:12:28
Site 005	grey fox	2018-09-15 19:25:14	2018-09-15	19:25:14	19:25:14
Site 006	black-tailed deer	2018-07-02 01:00:18	2018-07-02	01:00:18	1:00:18
Site 006	black-tailed deer	2018-07-02 08:58:34	2018-07-02	08:58:34	8:58:34
Site 006	black-tailed deer	2018-07-02 08:59:30	2018-07-02	08:59:30	8:59:30
Site 006	black-tailed deer	2018-07-07 20:43:27	2018-07-07	20:43:27	20:43:27
Site 006	black-tailed deer	2018-07-07 20:44:22	2018-07-07	20:44:22	20:44:22
Site 006	black-tailed deer	2018-07-07 20:45:16	2018-07-07	20:45:16	20:45:16
Site 006	black-tailed deer	2018-07-07 20:46:10	2018-07-07	20:46:10	20:46:10
Site 006	black-tailed deer	2018-07-07 20:47:05	2018-07-07	20:47:05	20:47:05
Site 006	black-tailed deer	2018-07-07 20:48:27	2018-07-07	20:48:27	20:48:27
Site 006	black-tailed deer	2018-07-07 20:50:41	2018-07-07	20:50:41	20:50:41
Site 006	black-tailed deer	2018-08-02 14:53:49	2018-08-02	14:53:49	14:53:49
Site 006	black-tailed deer	2018-08-03 10:27:17	2018-08-03	10:27:17	10:27:17
Site 006	black-tailed deer	2018-08-03 10:29:19	2018-08-03	10:29:19	10:29:19
Site 006	black-tailed deer	2018-08-18 22:25:44	2018-08-18	22:25:44	22:25:44
Site 006	black-tailed deer	2018-08-18 22:26:39	2018-08-18	22:26:39	22:26:39
Site 006	black-tailed deer	2018-08-18 22:27:33	2018-08-18	22:27:33	22:27:33
Site 006	black-tailed deer	2018-08-18 22:28:28	2018-08-18	22:28:28	22:28:28
Site 006	black-tailed deer	2018-09-01 14:08:24	2018-09-01	14:08:24	14:08:24
Site 006	bobcat	2019-01-12 18:17:24	2019-01-12	18:17:24	18:17:24
Site 006	bobcat	2019-01-12 18:18:26	2019-01-12	18:18:26	18:18:26
Site 006	bobcat	2019-01-16 21:11:10	2019-01-16	21:11:10	21:11:10
Site 006	bobcat	2019-01-21 06:26:50	2019-01-21	06:26:50	6:26:50
Site 006	coyote	2018-07-04 07:21:52	2018-07-04	07:21:52	7:21:52
Site 006	opossum	2018-07-02 01:39:04	2018-07-02	01:39:04	1:39:04
Site 006	opossum	2018-07-04 23:45:43	2018-07-04	23:45:43	23:45:43
Site 006	opossum	2018-07-05 03:58:33	2018-07-05	03:58:33	3:58:33
Site 006	opossum	2018-07-05 04:10:13	2018-07-05	04:10:13	4:10:13
Site 006	opossum	2018-07-07 23:59:57	2018-07-07	23:59:57	23:59:57
Site 006	opossum	2018-07-08 01:41:23	2018-07-08	01:41:23	1:41:23
Site 006	opossum	2018-07-10 23:42:20	2018-07-10	23:42:20	23:42:20
Site 006	opossum	2018-07-14 23:45:06	2018-07-14	23:45:06	23:45:06
Site 006	opossum	2018-07-22 08:46:15	2018-07-22	08:46:15	8:46:15
Site 006	opossum	2018-07-27 07:15:59	2018-07-27	07:15:59	7:15:59
Site 006	opossum	2018-08-15 22:20:36	2018-08-15	22:20:36	22:20:36
Site 006	opossum	2018-08-16 01:13:15	2018-08-16	01:13:15	1:13:15
Site 006	opossum	2018-08-23 01:30:20	2018-08-23	01:30:20	1:30:20
Site 006	opossum	2018-08-29 22:08:14	2018-08-29	22:08:14	22:08:14
Site 006	opossum	2018-09-03 00:18:11	2018-09-03	00:18:11	0:18:11
Site 006	raccoon	2018-07-05 00:56:11	2018-07-05	00:56:11	0:56:11
Site 006	raccoon	2018-07-11 21:27:13	2018-07-11	21:27:13	21:27:13
Site 006	raccoon	2018-07-11 21:28:23	2018-07-11	21:28:23	21:28:23
Site 006	raccoon	2018-07-12 04:00:22	2018-07-12	04:00:22	4:00:22
Site 006	raccoon	2018-08-04 00:43:58	2018-08-04	00:43:58	0:43:58
Site 006	raccoon	2018-08-17 02:05:09	2018-08-17	02:05:09	2:05:09
Site 006	raccoon	2018-08-22 01:53:01	2018-08-22	01:53:01	1:53:01
Site 006	raccoon	2018-08-23 22:12:43	2018-08-23	22:12:43	22:12:43
Site 006	raccoon	2018-08-30 00:33:44	2018-08-30	00:33:44	0:33:44
Site 006	raccoon	2018-08-30 02:23:15	2018-08-30	02:23:15	2:23:15
Site 006	raccoon	2018-09-02 03:40:33	2018-09-02	03:40:33	3:40:33
Site 006	striped skunk	2018-07-02 00:03:08	2018-07-02	00:03:08	0:03:08
Site 007	black-tailed deer	2018-04-22 19:28:24	2018-04-22	19:28:24	19:28:24
Site 007	black-tailed deer	2018-04-24 19:35:56	2018-04-24	19:35:56	19:35:56
Site 007	black-tailed deer	2018-04-24 19:37:05	2018-04-24	19:37:05	19:37:05
Site 007	black-tailed deer	2018-04-25 05:53:59	2018-04-25	05:53:59	5:53:59
Site 007	black-tailed deer	2018-04-25 05:55:00	2018-04-25	05:55:00	5:55:00
Site 007	black-tailed deer	2018-04-28 07:47:59	2018-04-28	07:47:59	7:47:59
Site 007	black-tailed deer	2018-04-28 23:47:07	2018-04-28	23:47:07	23:47:07
Site 007	black-tailed deer	2018-04-28 23:48:08	2018-04-28	23:48:08	23:48:08
Site 007	black-tailed deer	2018-04-28 23:51:44	2018-04-28	23:51:44	23:51:44
Site 007	black-tailed deer	2018-04-28 23:52:44	2018-04-28	23:52:44	23:52:44
Site 007	black-tailed deer	2018-04-29 06:13:16	2018-04-29	06:13:16	6:13:16
Site 007	black-tailed deer	2018-04-29 06:19:58	2018-04-29	06:19:58	6:19:58
Site 007	black-tailed deer	2018-04-30 08:38:52	2018-04-30	08:38:52	8:38:52
Site 007	black-tailed deer	2018-05-01 06:11:37	2018-05-01	06:11:37	6:11:37
Site 007	black-tailed deer	2018-05-01 06:20:11	2018-05-01	06:20:11	6:20:11
Site 007	black-tailed deer	2018-05-01 14:28:04	2018-05-01	14:28:04	14:28:04
Site 007	black-tailed deer	2018-05-05 05:39:20	2018-05-05	05:39:20	5:39:20
Site 007	black-tailed deer	2018-05-05 05:40:23	2018-05-05	05:40:23	5:40:23
Site 007	black-tailed deer	2018-05-05 05:41:22	2018-05-05	05:41:22	5:41:22
Site 007	black-tailed deer	2018-05-05 05:46:40	2018-05-05	05:46:40	5:46:40
Site 007	black-tailed deer	2018-05-06 05:10:57	2018-05-06	05:10:57	5:10:57
Site 007	black-tailed deer	2018-05-06 10:12:48	2018-05-06	10:12:48	10:12:48
Site 007	black-tailed deer	2018-05-06 10:19:33	2018-05-06	10:19:33	10:19:33
Site 007	black-tailed deer	2018-05-06 10:25:55	2018-05-06	10:25:55	10:25:55
Site 007	black-tailed deer	2018-05-06 10:33:47	2018-05-06	10:33:47	10:33:47
Site 007	black-tailed deer	2018-05-08 06:14:23	2018-05-08	06:14:23	6:14:23
Site 007	black-tailed deer	2018-05-08 06:15:27	2018-05-08	06:15:27	6:15:27
Site 007	black-tailed deer	2018-05-09 08:22:55	2018-05-09	08:22:55	8:22:55
Site 007	black-tailed deer	2018-05-10 16:11:55	2018-05-10	16:11:55	16:11:55
Site 007	black-tailed deer	2018-05-10 17:14:01	2018-05-10	17:14:01	17:14:01
Site 007	black-tailed deer	2018-05-10 17:15:01	2018-05-10	17:15:01	17:15:01
Site 007	black-tailed deer	2018-05-10 17:17:39	2018-05-10	17:17:39	17:17:39
Site 007	black-tailed deer	2018-05-10 17:18:39	2018-05-10	17:18:39	17:18:39
Site 007	black-tailed deer	2018-05-10 17:19:39	2018-05-10	17:19:39	17:19:39
Site 007	black-tailed deer	2018-05-10 17:21:08	2018-05-10	17:21:08	17:21:08
Site 007	black-tailed deer	2018-05-10 21:15:34	2018-05-10	21:15:34	21:15:34
Site 007	black-tailed deer	2018-05-16 09:24:52	2018-05-16	09:24:52	9:24:52
Site 007	black-tailed deer	2018-05-16 09:28:46	2018-05-16	09:28:46	9:28:46
Site 007	black-tailed deer	2018-05-17 05:41:44	2018-05-17	05:41:44	5:41:44
Site 007	black-tailed deer	2018-05-17 06:40:49	2018-05-17	06:40:49	6:40:49
Site 007	black-tailed deer	2018-05-17 06:43:00	2018-05-17	06:43:00	6:43:00
Site 007	black-tailed deer	2018-05-17 06:47:25	2018-05-17	06:47:25	6:47:25
Site 007	black-tailed deer	2018-05-17 12:33:21	2018-05-17	12:33:21	12:33:21
Site 007	black-tailed deer	2018-05-17 19:11:36	2018-05-17	19:11:36	19:11:36
Site 007	black-tailed deer	2018-05-17 19:13:37	2018-05-17	19:13:37	19:13:37
Site 007	black-tailed deer	2018-05-17 19:49:44	2018-05-17	19:49:44	19:49:44
Site 007	black-tailed deer	2018-05-19 21:37:27	2018-05-19	21:37:27	21:37:27
Site 007	black-tailed deer	2018-05-19 21:39:12	2018-05-19	21:39:12	21:39:12
Site 007	black-tailed deer	2018-05-19 21:40:12	2018-05-19	21:40:12	21:40:12
Site 007	black-tailed deer	2018-05-19 23:45:06	2018-05-19	23:45:06	23:45:06
Site 007	black-tailed deer	2018-05-19 23:46:17	2018-05-19	23:46:17	23:46:17
Site 007	black-tailed deer	2018-05-21 01:08:05	2018-05-21	01:08:05	1:08:05
Site 007	black-tailed deer	2018-05-21 01:46:01	2018-05-21	01:46:01	1:46:01
Site 007	black-tailed deer	2018-05-21 01:49:45	2018-05-21	01:49:45	1:49:45
Site 007	black-tailed deer	2018-05-21 01:51:41	2018-05-21	01:51:41	1:51:41
Site 007	black-tailed deer	2018-05-21 03:25:44	2018-05-21	03:25:44	3:25:44
Site 007	black-tailed deer	2018-05-21 05:31:38	2018-05-21	05:31:38	5:31:38
Site 007	black-tailed deer	2018-05-21 05:32:40	2018-05-21	05:32:40	5:32:40
Site 007	black-tailed deer	2018-05-21 05:46:34	2018-05-21	05:46:34	5:46:34
Site 007	black-tailed deer	2018-05-21 05:50:36	2018-05-21	05:50:36	5:50:36
Site 007	black-tailed deer	2018-05-21 05:51:37	2018-05-21	05:51:37	5:51:37
Site 007	black-tailed deer	2018-05-21 05:53:48	2018-05-21	05:53:48	5:53:48
Site 007	black-tailed deer	2018-05-21 05:55:02	2018-05-21	05:55:02	5:55:02
Site 007	black-tailed deer	2018-05-21 05:56:25	2018-05-21	05:56:25	5:56:25
Site 007	black-tailed deer	2018-05-21 05:57:54	2018-05-21	05:57:54	5:57:54
Site 007	black-tailed deer	2018-05-21 05:59:35	2018-05-21	05:59:35	5:59:35
Site 007	black-tailed deer	2018-05-21 06:28:51	2018-05-21	06:28:51	6:28:51
Site 007	black-tailed deer	2018-05-21 08:30:11	2018-05-21	08:30:11	8:30:11
Site 007	black-tailed deer	2018-05-21 18:28:19	2018-05-21	18:28:19	18:28:19
Site 007	black-tailed deer	2018-05-21 19:02:13	2018-05-21	19:02:13	19:02:13
Site 007	black-tailed deer	2018-05-22 20:15:41	2018-05-22	20:15:41	20:15:41
Site 007	black-tailed deer	2018-05-22 22:11:25	2018-05-22	22:11:25	22:11:25
Site 007	black-tailed deer	2018-05-23 01:02:27	2018-05-23	01:02:27	1:02:27
Site 007	black-tailed deer	2018-05-23 08:23:22	2018-05-23	08:23:22	8:23:22
Site 007	black-tailed deer	2018-05-23 09:27:30	2018-05-23	09:27:30	9:27:30
Site 007	black-tailed deer	2018-05-23 09:28:49	2018-05-23	09:28:49	9:28:49
Site 007	black-tailed deer	2018-05-24 00:10:38	2018-05-24	00:10:38	0:10:38
Site 007	black-tailed deer	2018-05-24 00:39:21	2018-05-24	00:39:21	0:39:21
Site 007	black-tailed deer	2018-05-25 09:25:24	2018-05-25	09:25:24	9:25:24
Site 007	black-tailed deer	2018-05-26 05:36:56	2018-05-26	05:36:56	5:36:56
Site 007	black-tailed deer	2018-05-26 05:56:03	2018-05-26	05:56:03	5:56:03
Site 007	black-tailed deer	2018-05-26 07:56:27	2018-05-26	07:56:27	7:56:27
Site 007	black-tailed deer	2018-05-26 08:30:00	2018-05-26	08:30:00	8:30:00
Site 007	black-tailed deer	2018-05-26 08:36:04	2018-05-26	08:36:04	8:36:04
Site 007	black-tailed deer	2018-05-26 08:37:52	2018-05-26	08:37:52	8:37:52
Site 007	black-tailed deer	2018-05-27 06:06:43	2018-05-27	06:06:43	6:06:43
Site 007	black-tailed deer	2018-05-27 21:11:58	2018-05-27	21:11:58	21:11:58
Site 007	black-tailed deer	2018-05-29 08:20:28	2018-05-29	08:20:28	8:20:28
Site 007	black-tailed deer	2018-05-29 20:51:19	2018-05-29	20:51:19	20:51:19
Site 007	black-tailed deer	2018-05-30 18:05:49	2018-05-30	18:05:49	18:05:49
Site 007	black-tailed deer	2018-05-31 05:35:10	2018-05-31	05:35:10	5:35:10
Site 007	black-tailed deer	2018-06-01 08:44:24	2018-06-01	08:44:24	8:44:24
Site 007	black-tailed deer	2018-06-01 19:38:27	2018-06-01	19:38:27	19:38:27
Site 007	black-tailed deer	2018-06-01 19:41:33	2018-06-01	19:41:33	19:41:33
Site 007	black-tailed deer	2018-06-02 04:35:02	2018-06-02	04:35:02	4:35:02
Site 007	black-tailed deer	2018-06-02 07:17:58	2018-06-02	07:17:58	7:17:58
Site 007	black-tailed deer	2018-06-04 11:32:03	2018-06-04	11:32:03	11:32:03
Site 007	black-tailed deer	2018-06-05 12:52:00	2018-06-05	12:52:00	12:52:00
Site 007	black-tailed deer	2018-06-05 19:08:59	2018-06-05	19:08:59	19:08:59
Site 007	black-tailed deer	2018-06-06 05:40:47	2018-06-06	05:40:47	5:40:47
Site 007	black-tailed deer	2018-06-06 07:24:43	2018-06-06	07:24:43	7:24:43
Site 007	black-tailed deer	2018-06-07 20:25:05	2018-06-07	20:25:05	20:25:05
Site 007	black-tailed deer	2018-06-09 16:05:33	2018-06-09	16:05:33	16:05:33
Site 007	black-tailed deer	2018-06-09 16:06:36	2018-06-09	16:06:36	16:06:36
Site 007	black-tailed deer	2018-06-09 16:07:39	2018-06-09	16:07:39	16:07:39
Site 007	black-tailed deer	2018-06-09 16:08:40	2018-06-09	16:08:40	16:08:40
Site 007	black-tailed deer	2018-06-09 16:09:40	2018-06-09	16:09:40	16:09:40
Site 007	black-tailed deer	2018-06-09 17:07:07	2018-06-09	17:07:07	17:07:07
Site 007	black-tailed deer	2018-06-09 17:08:09	2018-06-09	17:08:09	17:08:09
Site 007	black-tailed deer	2018-06-09 17:09:09	2018-06-09	17:09:09	17:09:09
Site 007	black-tailed deer	2018-06-10 19:07:34	2018-06-10	19:07:34	19:07:34
Site 007	black-tailed deer	2018-06-12 21:40:21	2018-06-12	21:40:21	21:40:21
Site 007	black-tailed deer	2018-06-14 09:38:10	2018-06-14	09:38:10	9:38:10
Site 007	black-tailed deer	2018-06-14 20:08:19	2018-06-14	20:08:19	20:08:19
Site 007	black-tailed deer	2018-06-14 20:09:28	2018-06-14	20:09:28	20:09:28
Site 007	black-tailed deer	2018-06-16 08:18:49	2018-06-16	08:18:49	8:18:49
Site 007	black-tailed deer	2018-06-16 22:00:15	2018-06-16	22:00:15	22:00:15
Site 007	black-tailed deer	2018-06-17 06:01:29	2018-06-17	06:01:29	6:01:29
Site 007	black-tailed deer	2018-06-17 06:02:46	2018-06-17	06:02:46	6:02:46
Site 007	black-tailed deer	2018-06-18 10:46:09	2018-06-18	10:46:09	10:46:09
Site 007	black-tailed deer	2018-06-18 20:03:15	2018-06-18	20:03:15	20:03:15
Site 007	black-tailed deer	2018-06-18 23:59:01	2018-06-18	23:59:01	23:59:01
Site 007	black-tailed deer	2018-06-19 00:01:32	2018-06-19	00:01:32	0:01:32
Site 007	black-tailed deer	2018-06-19 06:29:53	2018-06-19	06:29:53	6:29:53
Site 007	black-tailed deer	2018-06-21 06:59:41	2018-06-21	06:59:41	6:59:41
Site 007	black-tailed deer	2018-06-21 09:20:39	2018-06-21	09:20:39	9:20:39
Site 007	black-tailed deer	2018-06-21 12:52:49	2018-06-21	12:52:49	12:52:49
Site 007	black-tailed deer	2018-06-21 12:53:48	2018-06-21	12:53:48	12:53:48
Site 007	black-tailed deer	2018-06-21 12:54:48	2018-06-21	12:54:48	12:54:48
Site 007	black-tailed deer	2018-06-21 12:57:25	2018-06-21	12:57:25	12:57:25
Site 007	black-tailed deer	2018-06-21 12:58:26	2018-06-21	12:58:26	12:58:26
Site 007	black-tailed deer	2018-06-22 05:23:00	2018-06-22	05:23:00	5:23:00
Site 007	black-tailed deer	2018-06-22 18:41:44	2018-06-22	18:41:44	18:41:44
Site 007	black-tailed deer	2018-06-23 20:16:18	2018-06-23	20:16:18	20:16:18
Site 007	black-tailed deer	2018-06-23 20:19:43	2018-06-23	20:19:43	20:19:43
Site 007	black-tailed deer	2018-06-23 20:20:52	2018-06-23	20:20:52	20:20:52
Site 007	black-tailed deer	2018-06-23 20:22:17	2018-06-23	20:22:17	20:22:17
Site 007	black-tailed deer	2018-06-23 21:21:37	2018-06-23	21:21:37	21:21:37
Site 007	black-tailed deer	2018-06-23 21:23:10	2018-06-23	21:23:10	21:23:10
Site 007	black-tailed deer	2018-06-24 04:57:33	2018-06-24	04:57:33	4:57:33
Site 007	black-tailed deer	2018-06-24 04:58:33	2018-06-24	04:58:33	4:58:33
Site 007	black-tailed deer	2018-06-24 07:23:05	2018-06-24	07:23:05	7:23:05
Site 007	black-tailed deer	2018-06-24 08:10:29	2018-06-24	08:10:29	8:10:29
Site 007	black-tailed deer	2018-06-24 08:11:29	2018-06-24	08:11:29	8:11:29
Site 007	black-tailed deer	2018-06-24 08:12:30	2018-06-24	08:12:30	8:12:30
Site 007	black-tailed deer	2018-06-24 08:13:30	2018-06-24	08:13:30	8:13:30
Site 007	black-tailed deer	2018-06-24 13:14:56	2018-06-24	13:14:56	13:14:56
Site 007	black-tailed deer	2018-06-25 02:08:45	2018-06-25	02:08:45	2:08:45
Site 007	black-tailed deer	2018-06-25 02:09:44	2018-06-25	02:09:44	2:09:44
Site 007	black-tailed deer	2018-06-27 16:54:28	2018-06-27	16:54:28	16:54:28
Site 007	black-tailed deer	2018-06-27 17:25:08	2018-06-27	17:25:08	17:25:08
Site 007	black-tailed deer	2018-06-27 17:29:45	2018-06-27	17:29:45	17:29:45
Site 007	black-tailed deer	2018-06-28 06:46:59	2018-06-28	06:46:59	6:46:59
Site 007	black-tailed deer	2018-06-28 13:50:45	2018-06-28	13:50:45	13:50:45
Site 007	black-tailed deer	2018-06-28 18:56:18	2018-06-28	18:56:18	18:56:18
Site 007	black-tailed deer	2018-06-28 21:28:07	2018-06-28	21:28:07	21:28:07
Site 007	black-tailed deer	2018-06-28 21:29:27	2018-06-28	21:29:27	21:29:27
Site 007	black-tailed deer	2018-06-28 21:31:55	2018-06-28	21:31:55	21:31:55
Site 007	black-tailed deer	2018-06-29 08:33:46	2018-06-29	08:33:46	8:33:46
Site 007	black-tailed deer	2018-06-29 08:34:46	2018-06-29	08:34:46	8:34:46
Site 007	black-tailed deer	2018-06-29 08:36:31	2018-06-29	08:36:31	8:36:31
Site 007	black-tailed deer	2018-06-29 08:37:31	2018-06-29	08:37:31	8:37:31
Site 007	black-tailed deer	2018-06-29 08:38:54	2018-06-29	08:38:54	8:38:54
Site 007	black-tailed deer	2018-06-29 08:40:14	2018-06-29	08:40:14	8:40:14
Site 007	black-tailed deer	2018-06-29 08:41:28	2018-06-29	08:41:28	8:41:28
Site 007	black-tailed deer	2018-06-30 07:04:07	2018-06-30	07:04:07	7:04:07
Site 007	black-tailed deer	2018-06-30 07:05:07	2018-06-30	07:05:07	7:05:07
Site 007	black-tailed deer	2018-06-30 07:06:20	2018-06-30	07:06:20	7:06:20
Site 007	black-tailed deer	2018-06-30 07:07:20	2018-06-30	07:07:20	7:07:20
Site 007	black-tailed deer	2018-06-30 08:01:58	2018-06-30	08:01:58	8:01:58
Site 007	black-tailed deer	2018-07-01 15:40:07	2018-07-01	15:40:07	15:40:07
Site 007	black-tailed deer	2018-07-03 19:17:21	2018-07-03	19:17:21	19:17:21
Site 007	black-tailed deer	2018-07-03 19:54:43	2018-07-03	19:54:43	19:54:43
Site 007	black-tailed deer	2018-07-03 19:55:43	2018-07-03	19:55:43	19:55:43
Site 007	black-tailed deer	2018-07-03 19:56:43	2018-07-03	19:56:43	19:56:43
Site 007	black-tailed deer	2018-07-03 19:58:30	2018-07-03	19:58:30	19:58:30
Site 007	black-tailed deer	2018-07-03 20:30:19	2018-07-03	20:30:19	20:30:19
Site 007	black-tailed deer	2018-07-03 20:31:20	2018-07-03	20:31:20	20:31:20
Site 007	black-tailed deer	2018-07-03 20:32:21	2018-07-03	20:32:21	20:32:21
Site 007	black-tailed deer	2018-07-04 07:23:26	2018-07-04	07:23:26	7:23:26
Site 007	black-tailed deer	2018-07-04 07:49:29	2018-07-04	07:49:29	7:49:29
Site 007	black-tailed deer	2018-07-04 19:20:11	2018-07-04	19:20:11	19:20:11
Site 007	black-tailed deer	2018-07-04 19:21:11	2018-07-04	19:21:11	19:21:11
Site 007	black-tailed deer	2018-07-04 19:23:07	2018-07-04	19:23:07	19:23:07
Site 007	black-tailed deer	2018-07-04 19:24:25	2018-07-04	19:24:25	19:24:25
Site 007	black-tailed deer	2018-07-04 19:25:25	2018-07-04	19:25:25	19:25:25
Site 007	black-tailed deer	2018-07-04 19:27:29	2018-07-04	19:27:29	19:27:29
Site 007	black-tailed deer	2018-07-05 06:41:05	2018-07-05	06:41:05	6:41:05
Site 007	black-tailed deer	2018-07-05 18:57:53	2018-07-05	18:57:53	18:57:53
Site 007	black-tailed deer	2018-07-05 18:59:04	2018-07-05	18:59:04	18:59:04
Site 007	black-tailed deer	2018-07-05 19:00:53	2018-07-05	19:00:53	19:00:53
Site 007	black-tailed deer	2018-07-05 19:18:44	2018-07-05	19:18:44	19:18:44
Site 007	black-tailed deer	2018-07-05 19:19:46	2018-07-05	19:19:46	19:19:46
Site 007	black-tailed deer	2018-07-05 19:20:50	2018-07-05	19:20:50	19:20:50
Site 007	black-tailed deer	2018-07-05 19:21:50	2018-07-05	19:21:50	19:21:50
[truncated: 21,260 more rows]
